# Supplementary material for: Apoptosis in Cancer Cells Is Induced by Alternative Splicing of hnRNPA2/B1 Through Splicing of Bcl-x, a Mechanism that Can Be Stimulated by an Extract of the South African Medicinal Plant, Cotyledon orbiculata
Source: Front Oncol. 2020 Oct 8;10:547392. doi: 10.3389/fonc.2020.547392 (PMC7580256; doi:10.3389/fonc.2020.547392)
Supplement: Supplementary file 2 [file Data_Sheet_1.xlsx]

## Sheet: S Tab 1A Diff Exp EdgeR
Identifier	logFC	logCPM	PValue	FDR	Gene
ENSG00000130222	-12.1162	3.49839	6.75706e-25	4.09984e-20	GADD45G
ENSG00000197616	-11.3176	2.82882	3.95592e-22	1.20013e-17	MYH6
ENSG00000169896	-11.1241	2.52072	7.41535e-21	1.49975e-16	ITGAM
ENSG00000143110	-10.7241	2.1344	2.82902e-19	2.86084e-15	C1orf162
ENSG00000078401	-10.6705	2.08129	4.60796e-19	3.49485e-15	EDN1
ENSG00000277481	-10.5751	1.98804	1.08095e-18	7.28741e-15	PKD1L3
ENSG00000256128	-10.5494	1.94053	1.72029e-18	1.04379e-14	LINC00944
ENSG00000159251	-10.2939	1.78347	7.06821e-18	3.29895e-14	ACTC1
ENSG00000206538	-10.2165	1.60884	3.55695e-17	1.34886e-13	VGLL3
ENSG00000145536	-10.2118	1.66984	2.00369e-17	8.10494e-14	ADAMTS16
ENSG00000151474	-10.1737	1.58251	4.46389e-17	1.59321e-13	FRMD4A
ENSG00000212901	-10.1097	1.51772	8.20104e-17	2.48799e-13	KRTAP3-1
ENSG00000105929	-9.94431	1.34058	4.14278e-16	1.04735e-12	ATP6V0A4
ENSG00000087589	-9.80808	1.19672	1.50676e-15	3.51626e-12	CASS4
ENSG00000166396	-9.73155	1.10966	3.30619e-15	7.42974e-12	SERPINB7
ENSG00000112782	-9.61567	1.01655	7.59959e-15	1.44095e-11	CLIC5
ENSG00000081985	-9.56511	0.966872	1.1353e-14	1.96812e-11	IL12RB2
ENSG00000115009	-9.46623	0.880796	2.44459e-14	3.90331e-11	CCL20
ENSG00000112562	-9.4504	0.879478	2.44459e-14	3.90331e-11	SMOC2
ENSG00000237927	-9.43439	0.850933	3.26571e-14	5.08069e-11	AL078604.2
ENSG00000255010	-9.36853	0.794442	5.10062e-14	7.54829e-11	AP001767.2
ENSG00000260633	-9.33443	0.744836	8.08355e-14	1.1147e-10	AC010207.1
ENSG00000172349	-9.31708	0.736234	8.74133e-14	1.153e-10	IL16
ENSG00000230825	-9.27275	0.685318	1.41089e-13	1.78345e-10	AC005532.1
ENSG00000082497	-9.27275	0.612081	2.74277e-13	3.03105e-10	SERTAD4
ENSG00000229407	-9.26372	0.652301	1.80369e-13	2.14586e-10	AL359853.1
ENSG00000111859	-9.23629	0.677206	1.41089e-13	1.78345e-10	NEDD9
ENSG00000230047	-9.2177	0.588459	3.25497e-13	3.46483e-10	AC017104.2
ENSG00000255201	-9.18937	0.638804	1.95946e-13	2.24321e-10	AC087623.1
ENSG00000164509	-9.08044	0.480047	7.91648e-13	7.16914e-10	IL31RA
ENSG00000260082	-9.07012	0.477413	7.91648e-13	7.16914e-10	AC106886.1
ENSG00000047617	-9.00658	0.391792	1.68225e-12	1.37933e-09	ANO2
ENSG00000213772	-8.99571	0.496296	6.59721e-13	6.15825e-10	EIF1P7
ENSG00000048740	-8.92874	0.403564	1.38801e-12	1.16969e-09	CELF2
ENSG00000010379	-8.9057	0.34162	2.49108e-12	2.01529e-09	SLC6A13
ENSG00000267308	-8.89404	0.320894	3.04407e-12	2.33796e-09	LINC01764
ENSG00000246526	-8.88229	0.314163	3.04407e-12	2.33796e-09	LINC002481
ENSG00000196503	-8.85849	0.222961	6.99328e-12	4.76761e-09	ARL9
ENSG00000151360	-8.85849	0.255867	5.08987e-12	3.67653e-09	ALLC
ENSG00000231966	-8.8343	0.24878	5.65397e-12	3.989e-09	LINC02818
ENSG00000158113	-8.80969	0.205769	7.78706e-12	5.24978e-09	LRRC43
ENSG00000092054	-8.79723	0.297057	3.36866e-12	2.55492e-09	MYH7
ENSG00000170477	-8.79723	0.186826	9.67927e-12	6.24776e-09	KRT4
ENSG00000144834	-8.77197	0.189764	8.67812e-12	5.66177e-09	TAGLN3
ENSG00000271344	-8.77197	0.195821	8.67812e-12	5.66177e-09	AC018638.6
ENSG00000226312	-8.74627	0.0920157	2.13051e-11	1.24297e-08	CFLAR-AS1
ENSG00000221995	-8.67993	0.117652	1.51105e-11	9.26089e-09	TIAF1
ENSG00000164309	-8.66629	0.036713	3.41401e-11	1.84951e-08	CMYA5
ENSG00000224020	-8.66629	0.0821667	2.13051e-11	1.24297e-08	MIR181A2HG
ENSG00000259442	-8.63862	0.062351	2.39353e-11	1.35726e-08	AC105339.3
ENSG00000189423	-8.6104	0.0155689	3.8508e-11	2.02872e-08	USP32P3
ENSG00000169085	-8.53734	0.000941755	3.8508e-11	2.02872e-08	VXN
ENSG00000231595	-8.52228	-0.0143838	4.34799e-11	2.25482e-08	#N/A
ENSG00000050628	-8.52228	-0.0479676	6.29926e-11	3.13285e-08	PTGER3
ENSG00000238266	-8.50705	-0.0638408	7.14354e-11	3.46747e-08	LINC00707
ENSG00000271971	-8.49166	-0.0677805	7.14354e-11	3.46747e-08	AC120053.1
ENSG00000262655	-8.49166	-0.0867051	8.11017e-11	3.87504e-08	SPON1
ENSG00000239653	-8.47611	-0.115009	1.04901e-10	4.68003e-08	PSMD6-AS2
ENSG00000273237	-8.41216	-0.174001	1.78074e-10	7.15758e-08	#N/A
ENSG00000113578	-8.39573	-0.15811	1.36336e-10	5.71234e-08	FGF1
ENSG00000095932	-8.39573	-0.200527	2.03908e-10	7.93085e-08	SMIM24
ENSG00000229373	-8.3791	-0.228883	2.68429e-10	1.01161e-07	LINC00452
ENSG00000246130	-8.36227	-0.27269	4.09651e-10	1.46209e-07	AC107959.2
ENSG00000205085	-8.32803	-0.211861	2.03908e-10	7.93085e-08	FAM71F2
ENSG00000260105	-8.32803	-0.237818	2.68429e-10	1.01161e-07	AOC4P
ENSG00000232810	-8.32803	-0.260647	3.55307e-10	1.29869e-07	TNF
ENSG00000262155	-8.29295	-0.272253	3.55307e-10	1.29869e-07	LINC02175
ENSG00000137270	-8.257	-0.312484	4.72995e-10	1.6783e-07	GCM1
ENSG00000197332	-8.23868	-0.37306	8.53522e-10	2.82991e-07	AC008543.1
ENSG00000204538	-8.22012	-0.328959	5.46945e-10	1.91826e-07	PSORS1C2
ENSG00000277959	-8.22012	-0.39667	9.93167e-10	3.22248e-07	AL162274.2
ENSG00000249400	-8.22012	-0.351706	6.33418e-10	2.17133e-07	HMGB3P17
ENSG00000205267	-8.20133	-0.386905	8.53522e-10	2.82991e-07	DGAT2L7P
ENSG00000019549	-8.20133	-0.44214	1.35146e-09	4.18704e-07	SNAI2
ENSG00000144410	-8.16299	-0.396358	9.93167e-10	3.22248e-07	CPO
ENSG00000228040	-8.14343	-0.455376	1.58056e-09	4.74755e-07	AL390729.1
ENSG00000163606	-8.1236	-0.458901	1.58056e-09	4.74755e-07	CD200R1
ENSG00000188958	-8.1236	-0.468415	1.58056e-09	4.74755e-07	UTS2B
ENSG00000262772	-8.1236	-0.519871	2.55564e-09	6.98484e-07	LINC01977
ENSG00000129596	-8.10349	-0.462205	1.58056e-09	4.74755e-07	CDO1
ENSG00000251059	-8.0831	-0.544488	3.01078e-09	7.8403e-07	AC139722.1
ENSG00000118137	-8.0831	-0.537671	3.01078e-09	7.8403e-07	APOA1
ENSG00000197808	-8.04144	-0.495721	1.85176e-09	5.4278e-07	ZNF461
ENSG00000148735	-8.04144	-0.508759	2.17341e-09	6.1435e-07	PLEKHS1
ENSG00000154316	-8.04144	-0.521455	2.55564e-09	6.98484e-07	TDH
ENSG00000189068	-8.04144	-0.532216	2.55564e-09	6.98484e-07	VSTM1
ENSG00000182965	-8.02015	-0.603172	4.98124e-09	1.19461e-06	NPM1P14
ENSG00000111181	-8.02015	-0.533423	2.55564e-09	6.98484e-07	SLC6A12
ENSG00000103710	-8.02015	-0.57119	3.55384e-09	9.06005e-07	RASL12
ENSG00000163453	-7.99854	-0.515727	2.17341e-09	6.1435e-07	IGFBP7
ENSG00000230753	-7.99854	-0.581053	3.55384e-09	9.06005e-07	ZNF341-AS1
ENSG00000272836	-7.99854	-0.578087	3.55384e-09	9.06005e-07	AL022328.1
ENSG00000196115	-7.9766	-0.616116	4.98124e-09	1.19461e-06	ADAM5
ENSG00000104371	-7.9766	-0.679289	8.39698e-09	1.90107e-06	DKK4
ENSG00000179564	-7.95432	-0.588752	4.20317e-09	1.05383e-06	LSMEM2
ENSG00000272109	-7.95432	-0.612542	4.98124e-09	1.19461e-06	AC008906.2
ENSG00000265451	-7.95432	-0.656424	7.04024e-09	1.62421e-06	AC012447.1
ENSG00000236184	-7.93169	-0.70109	1.00376e-08	2.16738e-06	TCEA1P4
ENSG00000267709	-7.9087	-0.628815	4.98124e-09	1.19461e-06	AC024592.2
ENSG00000197588	-7.9087	-0.638937	5.91561e-09	1.39661e-06	KLKP1
ENSG00000166589	-7.9087	-0.646192	5.91561e-09	1.39661e-06	CDH16
ENSG00000234017	-7.88534	-0.62176	4.98124e-09	1.19461e-06	AC022018.1
ENSG00000164556	-7.88534	-0.690141	8.39698e-09	1.90107e-06	FAM183BP
ENSG00000215022	-7.88534	-0.703681	1.00376e-08	2.16738e-06	AL008729.1
ENSG00000225793	-7.8616	-0.676387	7.04024e-09	1.62421e-06	AL080250.1
ENSG00000151967	-7.8616	-0.715312	1.00376e-08	2.16738e-06	SCHIP1
ENSG00000157554	-7.8616	-0.731016	1.20264e-08	2.55141e-06	ERG
ENSG00000250697	-7.8129	-0.720904	1.00376e-08	2.16738e-06	AC010343.3
ENSG00000171291	-7.8129	-0.744238	1.20264e-08	2.55141e-06	ZNF439
ENSG00000115008	-7.8129	-0.770655	1.44433e-08	2.98077e-06	IL1A
ENSG00000180549	-7.8129	-0.784142	1.73879e-08	3.41124e-06	FUT7
ENSG00000260314	-7.8129	-0.790037	1.73879e-08	3.41124e-06	MRC1
ENSG00000162641	-7.8129	-0.837376	2.53905e-08	4.69686e-06	AKNAD1
ENSG00000270978	-7.78792	-0.759017	1.44433e-08	2.98077e-06	AC091982.2
ENSG00000223473	-7.78792	-0.737252	1.00376e-08	2.16738e-06	#N/A
ENSG00000271430	-7.78792	-0.788716	1.73879e-08	3.41124e-06	#N/A
ENSG00000260022	-7.78792	-0.790867	1.73879e-08	3.41124e-06	AL031716.1
ENSG00000145777	-7.76251	-0.79811	1.73879e-08	3.41124e-06	TSLP
ENSG00000132718	-7.76251	-0.81716	2.09848e-08	4.05494e-06	SYT11
ENSG00000276523	-7.76251	-0.84516	2.53905e-08	4.69686e-06	AC025287.3
ENSG00000169554	-7.73663	-0.770958	1.44433e-08	2.98077e-06	ZEB2
ENSG00000239701	-7.73663	-0.848423	2.53905e-08	4.69686e-06	AC006512.1
ENSG00000260144	-7.73663	-0.843867	2.53905e-08	4.69686e-06	AC100827.2
ENSG00000267185	-7.73663	-0.854448	3.08019e-08	5.43287e-06	PTP4A2P1
ENSG00000271826	-7.73663	-0.902382	4.57019e-08	7.25907e-06	PLS3-AS1
ENSG00000214788	-7.71028	-0.87592	3.08019e-08	5.43287e-06	AP000790.1
ENSG00000122122	-7.71028	-0.879126	3.08019e-08	5.43287e-06	SASH3
ENSG00000223653	-7.71028	-0.899266	3.74675e-08	6.33242e-06	AL078459.1
ENSG00000111405	-7.71028	-0.927273	4.57019e-08	7.25907e-06	ENDOU
ENSG00000163491	-7.71028	-0.947081	5.59054e-08	8.459e-06	NEK10
ENSG00000185662	-7.68345	-0.876821	3.08019e-08	5.43287e-06	SMIM23
ENSG00000138829	-7.68345	-0.92625	4.57019e-08	7.25907e-06	FBN2
ENSG00000279372	-7.68345	-0.891269	3.74675e-08	6.33242e-06	AC137723.1
ENSG00000197977	-7.68345	-0.963608	6.8588e-08	1.00279e-05	ELOVL2
ENSG00000173432	-7.6561	-0.893889	3.74675e-08	6.33242e-06	SAA1
ENSG00000236360	-7.6561	-0.905443	3.74675e-08	6.33242e-06	AL445183.3
ENSG00000158296	-7.6561	-0.913614	4.57019e-08	7.25907e-06	SLC13A3
ENSG00000266975	-7.6561	-0.912829	4.57019e-08	7.25907e-06	FARSA-AS1
ENSG00000120471	-7.6561	-0.94975	5.59054e-08	8.459e-06	TP53AIP1
ENSG00000270885	-7.6561	-0.926901	4.57019e-08	7.25907e-06	RASL10B
ENSG00000269125	-7.6561	-0.938346	5.59054e-08	8.459e-06	AL137002.1
ENSG00000272505	-7.62823	-0.920358	4.57019e-08	7.25907e-06	AC104964.4
ENSG00000117601	-7.62823	-0.983494	6.8588e-08	1.00279e-05	SERPINC1
ENSG00000113924	-7.5998	-0.961096	5.59054e-08	8.459e-06	HGD
ENSG00000261423	-7.5998	-1.04397	1.04187e-07	1.42699e-05	TMEM202-AS1
ENSG00000236393	-7.57081	-0.969913	5.59054e-08	8.459e-06	AC091806.1
ENSG00000136960	-7.57081	-1.03404	1.04187e-07	1.42699e-05	ENPP2
ENSG00000204869	-7.57081	-1.07293	1.29023e-07	1.69081e-05	IGFL4
ENSG00000279928	-7.54122	-1.01431	8.44023e-08	1.19652e-05	FO538757.1
ENSG00000143995	-7.54122	-0.969072	5.59054e-08	8.459e-06	MEIS1
ENSG00000268225	-7.54122	-0.990527	6.8588e-08	1.00279e-05	AC010487.1
ENSG00000183785	-7.54122	-1.06578	1.29023e-07	1.69081e-05	TUBA8
ENSG00000213221	-7.51101	-1.10346	1.60308e-07	2.01381e-05	DNLZ
ENSG00000176406	-7.51101	-1.15305	2.50051e-07	2.82252e-05	RIMS2
ENSG00000143107	-7.48016	-1.09089	1.29023e-07	1.69081e-05	FNDC7
ENSG00000268093	-7.48016	-1.09981	1.60308e-07	2.01381e-05	AC022154.1
ENSG00000243601	-7.48016	-1.11936	1.9986e-07	2.3709e-05	RPL12P24
ENSG00000239557	-7.48016	-1.16091	2.50051e-07	2.82252e-05	AC092045.1
ENSG00000175267	-7.48016	-1.15745	2.50051e-07	2.82252e-05	VWA3A
ENSG00000256087	-7.44863	-1.10228	1.60308e-07	2.01381e-05	ZNF432
ENSG00000170558	-7.44863	-1.06474	1.04187e-07	1.42699e-05	CDH2
ENSG00000250292	-7.44863	-1.07836	1.29023e-07	1.69081e-05	AC093844.1
ENSG00000236155	-7.44863	-1.13173	1.9986e-07	2.3709e-05	AL355877.1
ENSG00000127578	-7.44863	-1.15569	2.50051e-07	2.82252e-05	WFIKKN1
ENSG00000167654	-7.44863	-1.19107	3.13985e-07	3.39591e-05	ATCAY
ENSG00000184560	-7.44863	-1.21679	3.95751e-07	4.08371e-05	SPEM2
ENSG00000227676	-7.41639	-1.20734	3.13985e-07	3.39591e-05	LINC01068
ENSG00000229931	-7.41639	-1.20559	3.13985e-07	3.39591e-05	AL137003.1
ENSG00000280387	-7.41639	-1.13034	1.60308e-07	2.01381e-05	AL109806.1
ENSG00000092969	-7.41639	-1.19263	3.13985e-07	3.39591e-05	TGFB2
ENSG00000077009	-7.41639	-1.19239	3.13985e-07	3.39591e-05	NMRK2
ENSG00000275703	-7.41639	-1.15474	1.9986e-07	2.3709e-05	U47924.3
ENSG00000204671	-7.41639	-1.15323	1.9986e-07	2.3709e-05	IL31
ENSG00000133106	-7.41639	-1.15497	1.9986e-07	2.3709e-05	EPSTI1
ENSG00000178852	-7.41639	-1.15039	1.9986e-07	2.3709e-05	EFCAB13
ENSG00000275476	-7.41639	-1.16409	2.50051e-07	2.82252e-05	AC009318.4
ENSG00000124134	-7.38342	-1.23328	3.95751e-07	4.08371e-05	KCNS1
ENSG00000248385	-7.38342	-1.25386	5.00751e-07	4.97268e-05	TARM1
ENSG00000091972	-7.34968	-1.27982	5.00751e-07	4.97268e-05	CD200
ENSG00000248746	-7.34968	-1.27458	5.00751e-07	4.97268e-05	ACTN3
ENSG00000276427	-7.34968	-1.26623	5.00751e-07	4.97268e-05	IGLL4P
ENSG00000169194	-7.34968	-1.16797	1.9986e-07	2.3709e-05	IL13
ENSG00000177599	-7.34968	-1.18578	2.50051e-07	2.82252e-05	ZNF491
ENSG00000267904	-7.34968	-1.2099	3.13985e-07	3.39591e-05	AC024075.1
ENSG00000282021	-7.34968	-1.23955	3.95751e-07	4.08371e-05	AC100810.3
ENSG00000131097	-7.34968	-1.25129	3.95751e-07	4.08371e-05	HIGD1B
ENSG00000279863	-7.31513	-1.2346	3.13985e-07	3.39591e-05	AC069547.1
ENSG00000179921	-7.31513	-1.21035	2.50051e-07	2.82252e-05	GPBAR1
ENSG00000104804	-7.31513	-1.25823	3.95751e-07	4.08371e-05	TULP2
ENSG00000260899	-7.31513	-1.28251	5.00751e-07	4.97268e-05	AC106886.2
ENSG00000273342	-7.31513	-1.29145	5.00751e-07	4.97268e-05	AP000553.3
ENSG00000112214	-7.31513	-1.33834	8.11555e-07	7.39077e-05	FHL5
ENSG00000217165	-7.27973	-1.33112	8.11555e-07	7.39077e-05	ANKRD18EP
ENSG00000264269	-7.27973	-1.25473	3.95751e-07	4.08371e-05	AC016866.1
ENSG00000156413	-7.27973	-1.25731	3.95751e-07	4.08371e-05	FUT6
ENSG00000273464	-7.27973	-1.31306	6.36161e-07	6.08818e-05	AP000238.1
ENSG00000237781	-7.27973	-1.35262	8.11555e-07	7.39077e-05	AL356356.1
ENSG00000165807	-7.27973	-1.36493	1.03977e-06	9.07744e-05	PPP1R36
ENSG00000265728	-7.27973	-1.37102	1.03977e-06	9.07744e-05	AP001099.1
ENSG00000237115	-7.27973	-1.39237	1.33813e-06	0.000109569	AL139805.1
ENSG00000133083	-7.27199	1.04565	8.31348e-14	1.12093e-10	DCLK1
ENSG00000271788	-7.24345	-1.37527	1.03977e-06	9.07744e-05	AC008875.1
ENSG00000247213	-7.24345	-1.37353	1.03977e-06	9.07744e-05	LINC01498
ENSG00000237505	-7.24345	-1.32377	6.36161e-07	6.08818e-05	PKN2-AS1
ENSG00000271522	-7.24345	-1.33362	6.36161e-07	6.08818e-05	AC016831.6
ENSG00000279219	-7.24345	-1.3552	8.11555e-07	7.39077e-05	#N/A
ENSG00000272799	-7.20622	-1.34568	8.11555e-07	7.39077e-05	AC006238.1
ENSG00000274210	-7.20622	-1.34519	6.36161e-07	6.08818e-05	U1
ENSG00000220563	-7.20622	-1.40512	1.03977e-06	9.07744e-05	PKMP3
ENSG00000176840	-7.20622	-1.35419	8.11555e-07	7.39077e-05	MIR7-3HG
ENSG00000260277	-7.20622	-1.3169	5.00751e-07	4.97268e-05	AC009019.1
ENSG00000279518	-7.20622	-1.32821	6.36161e-07	6.08818e-05	AC083843.4
ENSG00000254847	-7.20622	-1.32538	6.36161e-07	6.08818e-05	AC009806.1
ENSG00000279414	-7.20622	-1.33141	6.36161e-07	6.08818e-05	CR392039.3
ENSG00000210112	-7.20622	-1.37515	1.03977e-06	9.07744e-05	MT-TM
ENSG00000172478	-7.20622	-1.42552	1.33813e-06	0.000109569	MAB21L4
ENSG00000255526	-7.20622	-1.43178	1.33813e-06	0.000109569	NEDD8-MDP1
ENSG00000112116	-7.16801	-1.45767	1.73007e-06	0.000137759	IL17F
ENSG00000276790	-7.16801	-1.45642	1.73007e-06	0.000137759	AC068234.3
ENSG00000124251	-7.16801	-1.37312	8.11555e-07	7.39077e-05	TP53TG5
ENSG00000256304	-7.16801	-1.44372	1.33813e-06	0.000109569	#N/A
ENSG00000165555	-7.16801	-1.44055	1.33813e-06	0.000109569	NOXRED1
ENSG00000235411	-7.16801	-1.36887	8.11555e-07	7.39077e-05	AC007041.1
ENSG00000100604	-7.16801	-1.36833	8.11555e-07	7.39077e-05	CHGA
ENSG00000162571	-7.16801	-1.40518	1.03977e-06	9.07744e-05	TTLL10
ENSG00000271590	-7.16801	-1.44014	1.33813e-06	0.000109569	AC108463.3
ENSG00000257761	-7.16801	-1.43738	1.33813e-06	0.000109569	AC078860.2
ENSG00000205959	-7.16801	-1.4265	1.33813e-06	0.000109569	AC105345.1
ENSG00000146122	-7.16801	-1.42072	1.33813e-06	0.000109569	DAAM2
ENSG00000150672	-7.12876	-1.41636	1.03977e-06	9.07744e-05	DLG2
ENSG00000198947	-7.12876	-1.38818	8.11555e-07	7.39077e-05	DMD
ENSG00000270178	-7.12876	-1.44883	1.33813e-06	0.000109569	AC007687.1
ENSG00000279762	-7.12876	-1.44883	1.33813e-06	0.000109569	AC005899.8
ENSG00000275560	-7.12876	-1.47456	1.73007e-06	0.000137759	AC008115.3
ENSG00000224080	-7.12876	-1.4592	1.73007e-06	0.000137759	UBE2FP1
ENSG00000004809	-7.12876	-1.5036	2.24759e-06	0.000168778	SLC22A16
ENSG00000256694	-7.08841	-1.45393	1.33813e-06	0.000109569	AC026369.2
ENSG00000241544	-7.08841	-1.53204	2.9345e-06	0.00021027	LINC02029
ENSG00000235526	-7.08841	-1.46241	1.33813e-06	0.000109569	AL355990.2
ENSG00000198074	-7.08841	-1.46386	1.33813e-06	0.000109569	AKR1B10
ENSG00000273476	-7.08841	-1.52062	2.24759e-06	0.000168778	AL133215.3
ENSG00000253892	-7.08841	-1.44899	1.33813e-06	0.000109569	AC022915.3
ENSG00000137869	-7.08841	-1.44306	1.33813e-06	0.000109569	CYP19A1
ENSG00000187479	-7.08841	-1.47276	1.73007e-06	0.000137759	C11orf96
ENSG00000230606	-7.08841	-1.51853	2.24759e-06	0.000168778	AC092683.1
ENSG00000259407	-7.08841	-1.50624	2.24759e-06	0.000168778	AC021739.2
ENSG00000261239	-7.08841	-1.49929	2.24759e-06	0.000168778	ANKRD26P1
ENSG00000263916	-7.08841	-1.50624	2.24759e-06	0.000168778	AC100778.2
ENSG00000101542	-7.08841	-1.49959	2.24759e-06	0.000168778	CDH20
ENSG00000244723	-7.08841	-1.54846	2.9345e-06	0.00021027	ASLP1
ENSG00000119508	-7.0514	3.15495	2.01032e-19	2.43952e-15	NR4A3
ENSG00000243116	-7.04691	-1.57534	3.85123e-06	0.000259061	AC092943.1
ENSG00000180245	-7.04691	-1.57472	3.85123e-06	0.000259061	RRH
ENSG00000154898	-7.04691	-1.5627	2.9345e-06	0.00021027	CCDC144CP
ENSG00000227082	-7.04691	-1.47151	1.33813e-06	0.000109569	LINC02798
ENSG00000257681	-7.04691	-1.51606	2.24759e-06	0.000168778	AC025265.1
ENSG00000233554	-7.04691	-1.53498	2.24759e-06	0.000168778	B4GALT1-AS1
ENSG00000277595	-7.04691	-1.53306	2.24759e-06	0.000168778	AC007546.1
ENSG00000225605	-7.04691	-1.55876	2.9345e-06	0.00021027	AC092813.1
ENSG00000185674	-7.04691	-1.55171	2.9345e-06	0.00021027	LYG2
ENSG00000249695	-7.04691	-1.54495	2.9345e-06	0.00021027	AC026369.1
ENSG00000203801	-7.04691	-1.57968	3.85123e-06	0.000259061	LINC00222
ENSG00000268836	-7.04691	-1.60781	3.85123e-06	0.000259061	Z69706.1
ENSG00000236609	-7.03702	0.815125	6.17419e-13	5.93282e-10	ZNF853
ENSG00000257193	-7.00417	-1.54564	2.24759e-06	0.000168778	LINC02385
ENSG00000206913	-7.00417	-1.60614	3.85123e-06	0.000259061	AP000577.1
ENSG00000176928	-7.00417	-1.55667	2.9345e-06	0.00021027	GCNT4
ENSG00000233073	-7.00417	-1.63833	5.08164e-06	0.000317537	AC005009.2
ENSG00000172803	-7.00417	-1.62948	5.08164e-06	0.000317537	SNX32
ENSG00000266777	-7.00417	-1.63564	5.08164e-06	0.000317537	SH3GL1P1
ENSG00000225083	-7.00417	-1.66045	6.74283e-06	0.000400314	GRTP1-AS1
ENSG00000092850	-6.96013	-1.66359	5.08164e-06	0.000317537	TEKT2
ENSG00000256540	-6.96013	-1.65187	5.08164e-06	0.000317537	AC007406.3
ENSG00000199568	-6.96013	-1.6494	5.08164e-06	0.000317537	RNU5A-1
ENSG00000268095	-6.96013	-1.55992	2.24759e-06	0.000168778	ZNF649-AS1
ENSG00000179242	-6.96013	-1.56925	2.9345e-06	0.00021027	CDH4
ENSG00000154783	-6.96013	-1.62698	3.85123e-06	0.000259061	FGD5
ENSG00000149256	-6.96013	-1.61913	3.85123e-06	0.000259061	TENM4
ENSG00000259001	-6.96013	-1.61082	3.85123e-06	0.000259061	AL355075.4
ENSG00000183911	-6.96013	-1.64466	5.08164e-06	0.000317537	RPL21P132
ENSG00000137571	-6.96013	-1.63978	5.08164e-06	0.000317537	SLCO5A1
ENSG00000179141	-6.96013	-1.62945	5.08164e-06	0.000317537	MTUS2-AS1
ENSG00000178385	-6.96013	-1.67361	6.74283e-06	0.000400314	PLEKHM3
ENSG00000267571	-6.9147	-1.70682	6.74283e-06	0.000400314	AC104532.2
ENSG00000277245	-6.9147	-1.63258	3.85123e-06	0.000259061	AC084782.3
ENSG00000233967	-6.9147	-1.70192	6.74283e-06	0.000400314	AL359715.1
ENSG00000248846	-6.9147	-1.6949	6.74283e-06	0.000400314	LINC02065
ENSG00000207357	-6.9147	-1.69346	6.74283e-06	0.000400314	RNU6-2
ENSG00000261574	-6.9147	-1.6459	5.08164e-06	0.000317537	#N/A
ENSG00000188211	-6.9147	-1.61782	3.85123e-06	0.000259061	NCR3LG1
ENSG00000109846	-6.9147	-1.61677	3.85123e-06	0.000259061	CRYAB
ENSG00000150594	-6.9147	-1.62058	3.85123e-06	0.000259061	ADRA2A
ENSG00000175414	-6.9147	-1.65942	5.08164e-06	0.000317537	ARL10
ENSG00000266117	-6.9147	-1.66688	5.08164e-06	0.000317537	FBXO36P1
ENSG00000263847	-6.9147	-1.66087	5.08164e-06	0.000317537	AP005899.1
ENSG00000125414	-6.9147	-1.6791	6.74283e-06	0.000400314	MYH2
ENSG00000204577	-6.9147	-1.71033	6.74283e-06	0.000400314	LILRB3
ENSG00000272541	-6.9147	-1.71946	8.99943e-06	0.000508892	AL021368.3
ENSG00000234663	-6.86779	-1.7543	8.99943e-06	0.000508892	LINC01934
ENSG00000266010	-6.86779	-1.7475	8.99943e-06	0.000508892	GATA6-AS1
ENSG00000227039	-6.86779	-1.68651	5.08164e-06	0.000317537	ITGB2-AS1
ENSG00000272468	-6.86779	-1.69115	6.74283e-06	0.000400314	AL021807.1
ENSG00000241818	-6.86779	-1.65728	3.85123e-06	0.000259061	AC123768.1
ENSG00000160097	-6.86779	-1.66157	5.08164e-06	0.000317537	FNDC5
ENSG00000224655	-6.86779	-1.66794	5.08164e-06	0.000317537	LINC01823
ENSG00000234290	-6.86779	-1.66907	5.08164e-06	0.000317537	AC116366.1
ENSG00000186452	-6.86779	-1.67122	5.08164e-06	0.000317537	TMPRSS12
ENSG00000101204	-6.86779	-1.65942	5.08164e-06	0.000317537	CHRNA4
ENSG00000261481	-6.86779	-1.69719	6.74283e-06	0.000400314	AC022167.4
ENSG00000187815	-6.86779	-1.7193	6.74283e-06	0.000400314	ZFP69
ENSG00000164175	-6.86779	-1.72468	6.74283e-06	0.000400314	SLC45A2
ENSG00000219738	-6.86779	-1.71896	6.74283e-06	0.000400314	CD83P1
ENSG00000255621	-6.86779	-1.71828	6.74283e-06	0.000400314	AC023790.2
ENSG00000230176	-6.86779	-1.71076	6.74283e-06	0.000400314	LINC01433
ENSG00000277687	-6.86779	-1.76109	8.99943e-06	0.000508892	AL139407.1
ENSG00000268230	-6.8193	-1.80266	1.20846e-05	0.00064375	AC012313.3
ENSG00000267505	-6.8193	-1.72783	6.74283e-06	0.000400314	AC005180.2
ENSG00000229528	-6.8193	-1.72971	6.74283e-06	0.000400314	AC119677.1
ENSG00000124194	-6.8193	-1.78959	1.20846e-05	0.00064375	GDAP1L1
ENSG00000231355	-6.8193	-1.74124	8.99943e-06	0.000508892	AP000302.1
ENSG00000264448	-6.8193	-1.70352	5.08164e-06	0.000317537	MIR378D2HG
ENSG00000229875	-6.8193	-1.70352	5.08164e-06	0.000317537	EIF1P1
ENSG00000238228	-6.8193	-1.71988	6.74283e-06	0.000400314	OR7E7P
ENSG00000054219	-6.8193	-1.75037	8.99943e-06	0.000508892	LY75
ENSG00000249628	-6.8193	-1.75727	8.99943e-06	0.000508892	LINC00942
ENSG00000268744	-6.8193	-1.75325	8.99943e-06	0.000508892	AC008758.4
ENSG00000158077	-6.8193	-1.77903	1.20846e-05	0.00064375	NLRP14
ENSG00000188487	-6.8193	-1.81685	1.63307e-05	0.000810191	INSC
ENSG00000215704	-6.76913	-1.84942	1.63307e-05	0.000810191	CELA2B
ENSG00000235213	-6.76913	-1.81352	1.20846e-05	0.00064375	OR6E1P
ENSG00000253796	-6.76913	-1.81425	1.20846e-05	0.00064375	AC104248.1
ENSG00000157445	-6.76913	-1.78581	8.99943e-06	0.000508892	CACNA2D3
ENSG00000257046	-6.76913	-1.78581	8.99943e-06	0.000508892	AC011604.2
ENSG00000053702	-6.76913	-1.78951	8.99943e-06	0.000508892	NRIP2
ENSG00000134339	-6.76913	-1.82943	1.63307e-05	0.000810191	SAA2
ENSG00000281469	-6.76913	-1.81019	1.20846e-05	0.00064375	AC019226.1
ENSG00000281527	-6.76913	-1.82462	1.20846e-05	0.00064375	#N/A
ENSG00000206113	-6.76913	-1.86053	1.63307e-05	0.000810191	CFAP99
ENSG00000228554	-6.76913	-1.85571	1.63307e-05	0.000810191	AC004837.2
ENSG00000131044	-6.76913	-1.86534	1.63307e-05	0.000810191	TTLL9
ENSG00000100739	-6.71716	-1.90238	2.22155e-05	0.00104087	BDKRB1
ENSG00000278685	-6.71716	-1.86657	1.63307e-05	0.000810191	IQCA1L
ENSG00000127366	-6.71716	-1.83341	1.20846e-05	0.00064375	TAS2R5
ENSG00000269959	-6.71716	-1.83605	1.20846e-05	0.00064375	SPACA6P-AS
ENSG00000229970	-6.71716	-1.84132	1.20846e-05	0.00064375	AC007128.1
ENSG00000225857	-6.71716	-1.84283	1.20846e-05	0.00064375	LINC02816
ENSG00000115896	-6.71716	-1.89108	2.22155e-05	0.00104087	PLCL1
ENSG00000254233	-6.71716	-1.84584	1.63307e-05	0.000810191	LINC02365
ENSG00000181126	-6.71716	-1.85865	1.63307e-05	0.000810191	HLA-V
ENSG00000123119	-6.71716	-1.87524	1.63307e-05	0.000810191	NECAB1
ENSG00000236430	-6.71716	-1.94009	3.04313e-05	0.00132265	KRT8P29
ENSG00000162894	-6.71716	-1.93142	3.04313e-05	0.00132265	FCMR
ENSG00000237230	-6.71716	-1.94009	3.04313e-05	0.00132265	KRTAP2-5P
ENSG00000269235	-6.66324	-1.88129	1.63307e-05	0.000810191	ZNF350-AS1
ENSG00000139572	-6.66324	-1.88284	1.63307e-05	0.000810191	GPR84
ENSG00000261241	-6.66324	-1.95428	3.04313e-05	0.00132265	LINC02128
ENSG00000267462	-6.66324	-1.94853	3.04313e-05	0.00132265	AC090377.1
ENSG00000236484	-6.66324	-1.8928	1.63307e-05	0.000810191	RRM2P2
ENSG00000235772	-6.66324	-1.8928	1.63307e-05	0.000810191	AP001625.2
ENSG00000179580	-6.66324	-1.94623	3.04313e-05	0.00132265	RNF151
ENSG00000267004	-6.66324	-1.94354	3.04313e-05	0.00132265	AC018761.1
ENSG00000073861	-6.66324	-1.94084	3.04313e-05	0.00132265	TBX21
ENSG00000228956	-6.66324	-1.87783	1.63307e-05	0.000810191	SATB1-AS1
ENSG00000236242	-6.66324	-1.87553	1.63307e-05	0.000810191	MYO16-AS1
ENSG00000269420	-6.66324	-1.87783	1.63307e-05	0.000810191	PLA2G4C-AS1
ENSG00000172399	-6.66324	-1.91778	2.22155e-05	0.00104087	MYOZ2
ENSG00000189014	-6.66324	-1.91281	2.22155e-05	0.00104087	SHLD2P3
ENSG00000234382	-6.66324	-1.91009	2.22155e-05	0.00104087	AL513174.1
ENSG00000237740	-6.66324	-1.93355	2.22155e-05	0.00104087	NPAP1P3
ENSG00000260439	-6.66324	-1.90781	2.22155e-05	0.00104087	LMF1-AS1
ENSG00000187848	-6.66324	-1.96581	3.04313e-05	0.00132265	P2RX2
ENSG00000265542	-6.66324	-1.97773	3.04313e-05	0.00132265	AC015845.2
ENSG00000280312	-6.66324	-1.97349	3.04313e-05	0.00132265	Z83836.1
ENSG00000260325	-6.66324	-1.98118	4.19888e-05	0.00169683	HSPB9
ENSG00000278655	-6.66324	-1.9927	4.19888e-05	0.00169683	AP000346.4
ENSG00000010295	-6.61995	0.439626	1.06016e-10	4.6845e-08	IFFO1
ENSG00000259399	-6.60722	-1.9385	2.22155e-05	0.00104087	TGIF2-RAB5IF
ENSG00000102174	-6.60722	-2.01213	4.19888e-05	0.00169683	PHEX
ENSG00000124657	-6.60722	-1.93887	2.22155e-05	0.00104087	OR2B6
ENSG00000188000	-6.60722	-2.01178	4.19888e-05	0.00169683	OR7D2
ENSG00000188501	-6.60722	-1.94122	2.22155e-05	0.00104087	LCTL
ENSG00000268316	-6.60722	-1.94122	2.22155e-05	0.00104087	AC006272.1
ENSG00000100342	-6.60722	-1.94558	2.22155e-05	0.00104087	APOL1
ENSG00000226921	-6.60722	-2.00669	4.19888e-05	0.00169683	LINC00454
ENSG00000112299	-6.60722	-2.0043	4.19888e-05	0.00169683	VNN1
ENSG00000142700	-6.60722	-1.95067	2.22155e-05	0.00104087	DMRTA2
ENSG00000171931	-6.60722	-1.94983	2.22155e-05	0.00104087	FBXW10
ENSG00000112541	-6.60722	-2.00236	4.19888e-05	0.00169683	PDE10A
ENSG00000280537	-6.60722	-1.99295	3.04313e-05	0.00132265	AC068946.1
ENSG00000270108	-6.60722	-1.92362	2.22155e-05	0.00104087	AL049840.6
ENSG00000202031	-6.60722	-1.96632	3.04313e-05	0.00132265	SNORD38A
ENSG00000213060	-6.60722	-1.98124	3.04313e-05	0.00132265	AL031864.1
ENSG00000186446	-6.60722	-1.98984	3.04313e-05	0.00132265	ZNF501
ENSG00000227014	-6.60722	-1.96438	3.04313e-05	0.00132265	AC007285.1
ENSG00000261072	-6.60722	-1.96789	3.04313e-05	0.00132265	AC084783.1
ENSG00000257017	-6.60722	-1.99142	3.04313e-05	0.00132265	HP
ENSG00000273216	-6.60722	-1.99142	3.04313e-05	0.00132265	AC002059.1
ENSG00000273188	-6.60722	-1.98709	3.04313e-05	0.00132265	AL022328.3
ENSG00000253223	-6.60722	-2.01605	4.19888e-05	0.00169683	AC110998.1
ENSG00000116183	-6.60722	-2.04738	5.83776e-05	0.00220827	PAPPA2
ENSG00000188373	-6.60722	-2.0423	5.83776e-05	0.00220827	C10orf99
ENSG00000282772	-6.60722	-2.04738	5.83776e-05	0.00220827	AL358790.1
ENSG00000204889	-6.60722	-2.04738	5.83776e-05	0.00220827	KRT40
ENSG00000207575	-6.60722	-2.04738	5.83776e-05	0.00220827	MIR649
ENSG00000213440	-6.60722	-2.04738	5.83776e-05	0.00220827	H2AFZP1
ENSG00000235748	-6.54895	-2.06878	5.83776e-05	0.00220827	SEPTIN14P12
ENSG00000277701	-6.54895	-2.00521	3.04313e-05	0.00132265	AC159540.2
ENSG00000163464	-6.54895	-2.06079	5.83776e-05	0.00220827	CXCR1
ENSG00000119725	-6.54895	-2.00843	3.04313e-05	0.00132265	ZNF410
ENSG00000150337	-6.54895	-2.00837	3.04313e-05	0.00132265	FCGR1A
ENSG00000197915	-6.54895	-2.00837	3.04313e-05	0.00132265	HRNR
ENSG00000196335	-6.54895	-2.00837	3.04313e-05	0.00132265	STK31
ENSG00000187753	-6.54895	-2.00837	3.04313e-05	0.00132265	C9orf153
ENSG00000240882	-6.54895	-2.01201	3.04313e-05	0.00132265	AC063952.2
ENSG00000265611	-6.54895	-2.01327	3.04313e-05	0.00132265	#N/A
ENSG00000270052	-6.54895	-2.01566	4.19888e-05	0.00169683	BX546450.2
ENSG00000236359	-6.54895	-1.97969	3.04313e-05	0.00132265	OR51B8P
ENSG00000123901	-6.54895	-1.99642	3.04313e-05	0.00132265	GPR83
ENSG00000257588	-6.54895	-1.97969	3.04313e-05	0.00132265	AC025154.2
ENSG00000198650	-6.54895	-1.99284	3.04313e-05	0.00132265	TAT
ENSG00000264057	-6.54895	-1.98327	3.04313e-05	0.00132265	AC103810.1
ENSG00000250969	-6.54895	-2.01685	4.19888e-05	0.00169683	AC097658.2
ENSG00000236861	-6.54895	-2.01637	4.19888e-05	0.00169683	AC006378.1
ENSG00000264125	-6.54895	-2.05202	4.19888e-05	0.00169683	AC104984.1
ENSG00000267892	-6.54895	-2.05364	4.19888e-05	0.00169683	AC022144.1
ENSG00000168314	-6.54895	-2.03167	4.19888e-05	0.00169683	MOBP
ENSG00000240006	-6.54895	-2.02128	4.19888e-05	0.00169683	LINC02004
ENSG00000277157	-6.54895	-2.03322	4.19888e-05	0.00169683	HIST1H4D
ENSG00000225339	-6.54895	-2.02086	4.19888e-05	0.00169683	AL354740.1
ENSG00000234695	-6.54895	-2.03237	4.19888e-05	0.00169683	AC002076.1
ENSG00000175820	-6.54895	-2.02683	4.19888e-05	0.00169683	CCDC168
ENSG00000274883	-6.54895	-2.03167	4.19888e-05	0.00169683	Metazoa_SRP
ENSG00000223254	-6.54895	-2.07321	5.83776e-05	0.00220827	Y_RNA
ENSG00000280198	-6.54895	-2.07321	5.83776e-05	0.00220827	AC087163.3
ENSG00000105261	-6.54895	-2.09233	5.83776e-05	0.00220827	OVOL3
ENSG00000189325	-6.48821	-2.05887	4.19888e-05	0.00169683	BNIP5
ENSG00000253696	-6.48821	-2.05887	4.19888e-05	0.00169683	KBTBD11-OT1
ENSG00000259511	-6.48821	-2.05887	4.19888e-05	0.00169683	UBE2Q2L
ENSG00000259436	-6.48821	-2.05887	4.19888e-05	0.00169683	AC010247.2
ENSG00000244256	-6.48821	-2.06009	4.19888e-05	0.00169683	RN7SL130P
ENSG00000179520	-6.48821	-2.09434	5.83776e-05	0.00220827	SLC17A8
ENSG00000259525	-6.48821	-2.06253	4.19888e-05	0.00169683	GCSHP2
ENSG00000240591	-6.48821	-2.06835	4.19888e-05	0.00169683	AL096701.3
ENSG00000226862	-6.48821	-2.06983	4.19888e-05	0.00169683	AC104463.2
ENSG00000272703	-6.48821	-2.06983	4.19888e-05	0.00169683	AP005137.2
ENSG00000270137	-6.48821	-2.11883	5.83776e-05	0.00220827	AF230666.2
ENSG00000154227	-6.48821	-2.07366	4.19888e-05	0.00169683	CERS3
ENSG00000282951	-6.48821	-2.07444	4.19888e-05	0.00169683	AC008537.4
ENSG00000233030	-6.48821	-2.04181	4.19888e-05	0.00169683	AC243772.2
ENSG00000254057	-6.48821	-2.04913	4.19888e-05	0.00169683	AC084346.1
ENSG00000186198	-6.48821	-2.04669	4.19888e-05	0.00169683	SLC51B
ENSG00000231367	-6.48821	-2.09487	5.83776e-05	0.00220827	LINC02613
ENSG00000224769	-6.48821	-2.11077	5.83776e-05	0.00220827	MUC20P1
ENSG00000251574	-6.48821	-2.09842	5.83776e-05	0.00220827	AC099520.1
ENSG00000244926	-6.48821	-2.09157	5.83776e-05	0.00220827	ALKBH3-AS1
ENSG00000276850	-6.48821	-2.11077	5.83776e-05	0.00220827	AC245041.2
ENSG00000260394	-6.48821	-2.08131	5.83776e-05	0.00220827	Z92544.1
ENSG00000231630	-6.48821	-2.15552	8.18128e-05	0.0028578	AL592464.1
ENSG00000236780	-6.48821	-2.16366	8.18128e-05	0.0028578	LINC01829
ENSG00000225358	-6.48821	-2.13724	8.18128e-05	0.0028578	MIPEPP1
ENSG00000260828	-6.48821	-2.13437	8.18128e-05	0.0028578	HMGB3P32
ENSG00000128254	-6.42481	-2.1924	0.000115619	0.00371568	C22orf24
ENSG00000228874	-6.42481	-2.1241	5.83776e-05	0.00220827	AC090954.1
ENSG00000282602	-6.42481	-2.18824	0.000115619	0.00371568	Z82244.2
ENSG00000230686	-6.42481	-2.12907	5.83776e-05	0.00220827	AC067945.2
ENSG00000069667	-6.42481	-2.18792	8.18128e-05	0.0028578	RORA
ENSG00000264772	-6.42481	-2.18792	8.18128e-05	0.0028578	AC016876.2
ENSG00000201967	-6.42481	-2.18792	8.18128e-05	0.0028578	RN7SKP22
ENSG00000261465	-6.42481	-2.13031	5.83776e-05	0.00220827	AC099518.4
ENSG00000279699	-6.42481	-2.13031	5.83776e-05	0.00220827	AC004264.2
ENSG00000172061	-6.42481	-2.13381	5.83776e-05	0.00220827	LRRC15
ENSG00000225807	-6.42481	-2.18408	8.18128e-05	0.0028578	AC069281.1
ENSG00000260971	-6.42481	-2.16089	8.18128e-05	0.0028578	AC119674.1
ENSG00000235670	-6.42481	-2.13404	5.83776e-05	0.00220827	RPL21P40
ENSG00000255587	-6.42481	-2.17991	8.18128e-05	0.0028578	RAB44
ENSG00000158859	-6.42481	-2.11416	5.83776e-05	0.00220827	ADAMTS4
ENSG00000007908	-6.42481	-2.11789	5.83776e-05	0.00220827	SELE
ENSG00000238133	-6.42481	-2.11416	5.83776e-05	0.00220827	MAP3K20-AS1
ENSG00000251596	-6.42481	-2.11168	5.83776e-05	0.00220827	HADHAP1
ENSG00000264991	-6.42481	-2.1067	5.83776e-05	0.00220827	#N/A
ENSG00000099834	-6.42481	-2.12286	5.83776e-05	0.00220827	CDHR5
ENSG00000260777	-6.42481	-2.1067	5.83776e-05	0.00220827	AC061975.1
ENSG00000229590	-6.42481	-2.12162	5.83776e-05	0.00220827	MSX2P1
ENSG00000234880	-6.42481	-2.11958	5.83776e-05	0.00220827	LINC00163
ENSG00000274510	-6.42481	-2.17496	8.18128e-05	0.0028578	Metazoa_SRP
ENSG00000256732	-6.42481	-2.17171	8.18128e-05	0.0028578	AC006065.4
ENSG00000156265	-6.42481	-2.17574	8.18128e-05	0.0028578	MAP3K7CL
ENSG00000271040	-6.42481	-2.16324	8.18128e-05	0.0028578	AL390955.2
ENSG00000184414	-6.42481	-2.16415	8.18128e-05	0.0028578	IRS3P
ENSG00000128268	-6.42481	-2.16415	8.18128e-05	0.0028578	MGAT3
ENSG00000231468	-6.42481	-2.22567	0.000115619	0.00371568	PRDX3P2
ENSG00000225383	-6.42481	-2.20905	0.000115619	0.00371568	SFTA1P
ENSG00000196628	-6.42481	-2.20411	0.000115619	0.00371568	TCF4
ENSG00000271366	-6.42481	-2.20073	0.000115619	0.00371568	AC002128.2
ENSG00000206150	-6.3585	-2.1911	8.18128e-05	0.0028578	RNASE13
ENSG00000275488	-6.3585	-2.25756	0.000115619	0.00371568	AC023509.5
ENSG00000273901	-6.3585	-2.25756	0.000115619	0.00371568	AC012313.9
ENSG00000257542	-6.3585	-2.19504	8.18128e-05	0.0028578	OR7E47P
ENSG00000230943	-6.3585	-2.1949	8.18128e-05	0.0028578	LINC02541
ENSG00000278244	-6.3585	-2.19678	8.18128e-05	0.0028578	#N/A
ENSG00000253347	-6.3585	-2.25331	0.000115619	0.00371568	AC040934.1
ENSG00000252965	-6.3585	-2.25236	0.000115619	0.00371568	Y_RNA
ENSG00000259555	-6.3585	-2.25236	0.000115619	0.00371568	AC067863.1
ENSG00000267567	-6.3585	-2.25236	0.000115619	0.00371568	AC008736.2
ENSG00000278909	-6.3585	-2.1987	8.18128e-05	0.0028578	AC007608.4
ENSG00000232907	-6.3585	-2.25205	0.000115619	0.00371568	DLGAP4-AS1
ENSG00000138079	-6.3585	-2.19964	8.18128e-05	0.0028578	SLC3A1
ENSG00000231566	-6.3585	-2.20011	8.18128e-05	0.0028578	LINC02595
ENSG00000227497	-6.3585	-2.20123	8.18128e-05	0.0028578	PABPC1P6
ENSG00000144191	-6.3585	-2.20123	8.18128e-05	0.0028578	CNGA3
ENSG00000237021	-6.3585	-2.20123	8.18128e-05	0.0028578	#N/A
ENSG00000275489	-6.3585	-2.20123	8.18128e-05	0.0028578	C17orf98
ENSG00000227212	-6.3585	-2.18983	8.18128e-05	0.0028578	PFN1P6
ENSG00000163263	-6.3585	-2.18476	8.18128e-05	0.0028578	C1orf189
ENSG00000216364	-6.3585	-2.17461	8.18128e-05	0.0028578	MRPL42P2
ENSG00000034053	-6.3585	-2.17461	8.18128e-05	0.0028578	APBA2
ENSG00000279759	-6.3585	-2.20977	8.18128e-05	0.0028578	AC118344.2
ENSG00000066185	-6.3585	-2.24385	0.000115619	0.00371568	ZMYND12
ENSG00000256358	-6.3585	-2.2448	0.000115619	0.00371568	RPL31P57
ENSG00000238009	-6.3585	-2.23202	0.000115619	0.00371568	AL627309.1
ENSG00000228139	-6.3585	-2.23959	0.000115619	0.00371568	LINC01402
ENSG00000269924	-6.3585	-2.22682	0.000115619	0.00371568	AC024451.4
ENSG00000230188	-6.3585	-2.21338	0.000115619	0.00371568	AL158156.1
ENSG00000177291	-6.3585	-2.23502	0.000115619	0.00371568	GJD4
ENSG00000277186	-6.3585	-2.23549	0.000115619	0.00371568	AC131212.1
ENSG00000251467	-6.3585	-2.2821	0.00016484	0.00486935	AC020893.2
ENSG00000234210	-6.3585	-2.29058	0.00016484	0.00486935	AC006372.3
ENSG00000228547	-6.3585	-2.29058	0.00016484	0.00486935	OR7E26P
ENSG00000256661	-6.3585	-2.29058	0.00016484	0.00486935	A2ML1-AS1
ENSG00000245750	-6.3585	-2.27361	0.00016484	0.00486935	DRAIC
ENSG00000177455	-6.3585	-2.27409	0.00016484	0.00486935	CD19
ENSG00000267406	-6.3585	-2.29058	0.00016484	0.00486935	AC011509.1
ENSG00000211648	-6.3585	-2.29058	0.00016484	0.00486935	IGLV1-47
ENSG00000126231	-6.32538	0.958451	6.93641e-12	4.76761e-09	PROZ
ENSG00000124225	-6.31014	4.30941	2.4771e-18	1.36635e-14	PMEPA1
ENSG00000263201	-6.28899	-2.26187	0.000115619	0.00371568	DPEP2NB
ENSG00000231725	-6.28899	-2.26267	0.000115619	0.00371568	VN1R110P
ENSG00000253420	-6.28899	-2.26365	0.000115619	0.00371568	AC103853.1
ENSG00000230970	-6.28899	-2.32497	0.00016484	0.00486935	HHATL-AS1
ENSG00000133636	-6.28899	-2.32497	0.00016484	0.00486935	NTS
ENSG00000259384	-6.28899	-2.26655	0.000115619	0.00371568	GH1
ENSG00000223561	-6.28899	-2.26914	0.000115619	0.00371568	AC005165.1
ENSG00000256625	-6.28899	-2.31963	0.00016484	0.00486935	AC092747.2
ENSG00000261678	-6.28899	-2.27043	0.000115619	0.00371568	SCRT1
ENSG00000269009	-6.28899	-2.31933	0.00016484	0.00486935	SLC6A21P
ENSG00000216762	-6.28899	-2.27172	0.000115619	0.00371568	VN1R13P
ENSG00000226453	-6.28899	-2.27172	0.000115619	0.00371568	LINC02542
ENSG00000213412	-6.28899	-2.27172	0.000115619	0.00371568	HNRNPA1P33
ENSG00000140090	-6.28899	-2.27172	0.000115619	0.00371568	SLC24A4
ENSG00000214424	-6.28899	-2.27172	0.000115619	0.00371568	FAM149B1P1
ENSG00000078328	-6.28899	-2.27172	0.000115619	0.00371568	RBFOX1
ENSG00000152377	-6.28899	-2.27448	0.000115619	0.00371568	SPOCK1
ENSG00000166682	-6.28899	-2.27608	0.000115619	0.00371568	TMPRSS5
ENSG00000278737	-6.28899	-2.27657	0.000115619	0.00371568	AC013553.4
ENSG00000138109	-6.28899	-2.27982	0.000115619	0.00371568	CYP2C9
ENSG00000158816	-6.28899	-2.24585	0.000115619	0.00371568	VWA5B1
ENSG00000249509	-6.28899	-2.25362	0.000115619	0.00371568	AC023886.1
ENSG00000135077	-6.28899	-2.25103	0.000115619	0.00371568	HAVCR2
ENSG00000215644	-6.28899	-2.24585	0.000115619	0.00371568	GCGR
ENSG00000234933	-6.28899	-2.24585	0.000115619	0.00371568	CDC42P1
ENSG00000235081	-6.28899	-2.24585	0.000115619	0.00371568	AC245052.3
ENSG00000274258	-6.28899	-2.3137	0.00016484	0.00486935	MIR6728
ENSG00000269956	-6.28899	-2.30708	0.00016484	0.00486935	MKNK1-AS1
ENSG00000203804	-6.28899	-2.29113	0.00016484	0.00486935	ADAMTSL4-AS1
ENSG00000274049	-6.28899	-2.30965	0.00016484	0.00486935	INO80B-WBP1
ENSG00000131379	-6.28899	-2.29063	0.00016484	0.00486935	C3orf20
ENSG00000188306	-6.28899	-2.29757	0.00016484	0.00486935	LRRIQ4
ENSG00000205097	-6.28899	-2.28547	0.00016484	0.00486935	FRG2
ENSG00000234537	-6.28899	-2.29788	0.00016484	0.00486935	AL354751.1
ENSG00000228401	-6.28899	-2.29113	0.00016484	0.00486935	AL590226.1
ENSG00000229261	-6.28899	-2.32832	0.00016484	0.00486935	AL596223.1
ENSG00000227165	-6.28899	-2.29757	0.00016484	0.00486935	WDR11-AS1
ENSG00000278700	-6.28899	-2.28756	0.00016484	0.00486935	Metazoa_SRP
ENSG00000282936	-6.28899	-2.28498	0.00016484	0.00486935	AC004706.3
ENSG00000266826	-6.28899	-2.32832	0.00016484	0.00486935	AC011195.2
ENSG00000262343	-6.28899	-2.28916	0.00016484	0.00486935	AC100791.1
ENSG00000064886	-6.28899	-2.35869	0.0002372	0.00652113	CHI3L2
ENSG00000115592	-6.28899	-2.34184	0.0002372	0.00652113	PRKAG3
ENSG00000248399	-6.28899	-2.35869	0.0002372	0.00652113	AL645924.1
ENSG00000282988	-6.28899	-2.33701	0.0002372	0.00652113	AL031777.3
ENSG00000259192	-6.28899	-2.35869	0.0002372	0.00652113	AC109631.1
ENSG00000137875	-6.28899	-2.34135	0.0002372	0.00652113	BCL2L10
ENSG00000266456	-6.28899	-2.35869	0.0002372	0.00652113	AP001178.3
ENSG00000187902	-6.28899	-2.33701	0.0002372	0.00652113	SHISA7
ENSG00000197540	-6.22801	1.39309	1.54379e-13	1.91162e-10	GZMM
ENSG00000239219	-6.21596	-2.39927	0.0002372	0.00652113	AC008040.1
ENSG00000234329	-6.21596	-2.33923	0.00016484	0.00486935	AL604028.2
ENSG00000273950	-6.21596	-2.39483	0.0002372	0.00652113	Metazoa_SRP
ENSG00000259884	-6.21596	-2.34319	0.00016484	0.00486935	AC025259.3
ENSG00000279265	-6.21596	-2.34421	0.00016484	0.00486935	AC000123.2
ENSG00000227359	-6.21596	-2.34451	0.00016484	0.00486935	AC017074.1
ENSG00000229867	-6.21596	-2.34451	0.00016484	0.00486935	STEAP3-AS1
ENSG00000235454	-6.21596	-2.34451	0.00016484	0.00486935	HAUS6P3
ENSG00000168032	-6.21596	-2.34583	0.00016484	0.00486935	ENTPD3
ENSG00000281186	-6.21596	-2.34583	0.00016484	0.00486935	LINC00706
ENSG00000232110	-6.21596	-2.34583	0.00016484	0.00486935	AL353751.1
ENSG00000080166	-6.21596	-2.34583	0.00016484	0.00486935	DCT
ENSG00000276704	-6.21596	-2.34583	0.00016484	0.00486935	AL442067.2
ENSG00000200204	-6.21596	-2.34583	0.00016484	0.00486935	RNU1-22P
ENSG00000231625	-6.21596	-2.34583	0.00016484	0.00486935	SLC47A1P2
ENSG00000161298	-6.21596	-2.34583	0.00016484	0.00486935	ZNF382
ENSG00000174844	-6.21596	-2.3497	0.00016484	0.00486935	DNAH12
ENSG00000148600	-6.21596	-2.3497	0.00016484	0.00486935	CDHR1
ENSG00000247372	-6.21596	-2.3901	0.0002372	0.00652113	AC008897.2
ENSG00000184774	-6.21596	-2.35548	0.00016484	0.00486935	MGAT4EP
ENSG00000240100	-6.21596	-2.35548	0.00016484	0.00486935	AC083806.1
ENSG00000215414	-6.21596	-2.35344	0.00016484	0.00486935	PSMA6P1
ENSG00000273768	-6.21596	-2.32867	0.00016484	0.00486935	U1
ENSG00000223374	-6.21596	-2.32602	0.00016484	0.00486935	AC005104.1
ENSG00000226306	-6.21596	-2.32073	0.00016484	0.00486935	NPY6R
ENSG00000107165	-6.21596	-2.32073	0.00016484	0.00486935	TYRP1
ENSG00000256171	-6.21596	-2.32602	0.00016484	0.00486935	GCSHP4
ENSG00000171827	-6.21596	-2.32073	0.00016484	0.00486935	ZNF570
ENSG00000240770	-6.21596	-2.33131	0.00016484	0.00486935	C21orf91-OT1
ENSG00000224481	-6.21596	-2.40371	0.0002372	0.00652113	AC245100.1
ENSG00000232832	-6.21596	-2.37857	0.0002372	0.00652113	LMLN-AS1
ENSG00000261668	-6.21596	-2.40161	0.0002372	0.00652113	AC093591.2
ENSG00000237251	-6.21596	-2.40161	0.0002372	0.00652113	AC004987.3
ENSG00000180139	-6.21596	-2.40371	0.0002372	0.00652113	ACTA2-AS1
ENSG00000257219	-6.21596	-2.36338	0.0002372	0.00652113	LNCOG
ENSG00000092067	-6.21596	-2.37361	0.0002372	0.00652113	CEBPE
ENSG00000196796	-6.21596	-2.37127	0.0002372	0.00652113	NPIPB10P
ENSG00000261701	-6.21596	-2.40161	0.0002372	0.00652113	HPR
ENSG00000168454	-6.21596	-2.40371	0.0002372	0.00652113	TXNDC2
ENSG00000268083	-6.21596	-2.40736	0.0002372	0.00652113	AC008982.1
ENSG00000117152	-6.21596	-2.4131	0.000344676	0.00859211	RGS4
ENSG00000234277	-6.21596	-2.41702	0.000344676	0.00859211	LINC01641
ENSG00000272656	-6.21596	-2.43031	0.000344676	0.00859211	AC024933.1
ENSG00000243799	-6.21596	-2.43031	0.000344676	0.00859211	PEX5L-AS1
ENSG00000251281	-6.21596	-2.41884	0.000344676	0.00859211	AC034223.2
ENSG00000130988	-6.21596	-2.40684	0.000344676	0.00859211	RGN
ENSG00000230889	-6.21596	-2.43031	0.000344676	0.00859211	SHC1P1
ENSG00000272384	-6.21596	-2.40815	0.000344676	0.00859211	AC016405.3
ENSG00000242986	-6.21596	-2.43031	0.000344676	0.00859211	RPL21P99
ENSG00000257509	-6.21596	-2.40815	0.000344676	0.00859211	AC073487.1
ENSG00000256037	-6.21596	-2.43031	0.000344676	0.00859211	MRPL40P1
ENSG00000187812	-6.21596	-2.43031	0.000344676	0.00859211	AC019294.1
ENSG00000266258	-6.21596	-2.43031	0.000344676	0.00859211	LINC01909
ENSG00000226995	-6.21596	-2.43031	0.000344676	0.00859211	LINC00658
ENSG00000268400	-6.21596	-2.41259	0.000344676	0.00859211	AC008763.2
ENSG00000142871	-6.16013	8.25366	3.60669e-19	3.12623e-15	CCN1
ENSG00000221500	-6.13903	-2.41452	0.0002372	0.00652113	SNORD100
ENSG00000170423	-6.13903	-2.41452	0.0002372	0.00652113	KRT78
ENSG00000125845	-6.13903	-2.41587	0.0002372	0.00652113	BMP2
ENSG00000229414	-6.13903	-2.44731	0.000344676	0.00859211	KCNQ1-AS1
ENSG00000230226	-6.13903	-2.47409	0.000344676	0.00859211	AL121829.1
ENSG00000236480	-6.13903	-2.44704	0.000344676	0.00859211	PKMP1
ENSG00000258384	-6.13903	-2.44704	0.000344676	0.00859211	AC068831.1
ENSG00000260468	-6.13903	-2.44704	0.000344676	0.00859211	LINC01290
ENSG00000224888	-6.13903	-2.44704	0.000344676	0.00859211	AC138028.2
ENSG00000116701	-6.13903	-2.41857	0.0002372	0.00652113	NCF2
ENSG00000185739	-6.13903	-2.42098	0.0002372	0.00652113	SRL
ENSG00000267255	-6.13903	-2.46955	0.000344676	0.00859211	AC011498.3
ENSG00000226535	-6.13903	-2.42261	0.0002372	0.00652113	AL445487.1
ENSG00000225063	-6.13903	-2.42395	0.0002372	0.00652113	AC093422.2
ENSG00000183023	-6.13903	-2.42395	0.0002372	0.00652113	SLC8A1
ENSG00000184650	-6.13903	-2.42395	0.0002372	0.00652113	ODF4
ENSG00000206102	-6.13903	-2.42395	0.0002372	0.00652113	KRTAP19-8
ENSG00000253943	-6.13903	-2.465	0.000344676	0.00859211	KRT18P37
ENSG00000260803	-6.13903	-2.42931	0.0002372	0.00652113	Z84723.1
ENSG00000116132	-6.13903	-2.39967	0.0002372	0.00652113	PRRX1
ENSG00000244327	-6.13903	-2.39967	0.0002372	0.00652113	AC109992.2
ENSG00000250891	-6.13903	-2.40508	0.0002372	0.00652113	LINC02208
ENSG00000219433	-6.13903	-2.40643	0.0002372	0.00652113	BTBD10P2
ENSG00000187258	-6.13903	-2.39967	0.0002372	0.00652113	NPSR1
ENSG00000125675	-6.13903	-2.39967	0.0002372	0.00652113	GRIA3
ENSG00000228877	-6.13903	-2.41048	0.0002372	0.00652113	AL669970.3
ENSG00000256146	-6.13903	-2.41317	0.0002372	0.00652113	AC006206.1
ENSG00000267501	-6.13903	-2.39967	0.0002372	0.00652113	AC104365.2
ENSG00000124449	-6.13903	-2.40561	0.0002372	0.00652113	IRGC
ENSG00000272663	-6.13903	-2.46473	0.000344676	0.00859211	AC093635.1
ENSG00000270190	-6.13903	-2.4441	0.000344676	0.00859211	AC068491.3
ENSG00000281404	-6.13903	-2.44113	0.000344676	0.00859211	LINC01176
ENSG00000228204	-6.13903	-2.46045	0.000344676	0.00859211	AC004830.2
ENSG00000235631	-6.13903	-2.45643	0.000344676	0.00859211	RNF148
ENSG00000254479	-6.13903	-2.45294	0.000344676	0.00859211	SLC25A1P1
ENSG00000232043	-6.13903	-2.48238	0.000344676	0.00859211	AL133230.1
ENSG00000261341	-6.13903	-2.46152	0.000344676	0.00859211	AC010325.1
ENSG00000233360	-6.13903	-2.47864	0.000344676	0.00859211	Z83844.2
ENSG00000132464	-6.13903	-2.50584	0.000506039	0.0114738	ENAM
ENSG00000182168	-6.13903	-2.50584	0.000506039	0.0114738	UNC5C
ENSG00000125337	-6.13903	-2.50584	0.000506039	0.0114738	KIF25
ENSG00000237708	-6.13903	-2.50584	0.000506039	0.0114738	AL139397.2
ENSG00000272264	-6.13903	-2.50584	0.000506039	0.0114738	AC009686.2
ENSG00000254596	-6.13903	-2.50584	0.000506039	0.0114738	AP002748.3
ENSG00000255893	-6.13903	-2.50584	0.000506039	0.0114738	AP000786.1
ENSG00000111404	-6.13903	-2.50584	0.000506039	0.0114738	RERGL
ENSG00000202368	-6.13903	-2.50584	0.000506039	0.0114738	Y_RNA
ENSG00000124391	-6.13903	-2.48771	0.000506039	0.0114738	IL17C
ENSG00000232396	-6.13903	-2.50584	0.000506039	0.0114738	AC004882.1
ENSG00000158525	-6.05778	-2.4983	0.000344676	0.00859211	CPA5
ENSG00000231125	-6.05778	-2.49968	0.000344676	0.00859211	AF129075.1
ENSG00000181143	-6.05778	-2.50134	0.000344676	0.00859211	MUC16
ENSG00000273729	-6.05778	-2.55571	0.000506039	0.0114738	AC007686.3
ENSG00000220008	-6.05778	-2.55515	0.000506039	0.0114738	LINGO3
ENSG00000164619	-6.05778	-2.55323	0.000506039	0.0114738	BMPER
ENSG00000228695	-6.05778	-2.55323	0.000506039	0.0114738	CES1P1
ENSG00000132274	-6.05778	-2.50243	0.000344676	0.00859211	TRIM22
ENSG00000272625	-6.05778	-2.52912	0.000506039	0.0114738	AP000919.4
ENSG00000078795	-6.05778	-2.5074	0.000344676	0.00859211	PKD2L2
ENSG00000224799	-6.05778	-2.5074	0.000344676	0.00859211	AL139397.1
ENSG00000235795	-6.05778	-2.50656	0.000344676	0.00859211	AC093157.2
ENSG00000261000	-6.05778	-2.50656	0.000344676	0.00859211	AC244034.2
ENSG00000178631	-6.05778	-2.50656	0.000344676	0.00859211	ACTG1P1
ENSG00000231638	-6.05778	-2.50656	0.000344676	0.00859211	LUARIS
ENSG00000279246	-6.05778	-2.50656	0.000344676	0.00859211	AP003108.3
ENSG00000259563	-6.05778	-2.50656	0.000344676	0.00859211	AC025430.1
ENSG00000243404	-6.05778	-2.50656	0.000344676	0.00859211	RPL35AP32
ENSG00000269792	-6.05778	-2.50656	0.000344676	0.00859211	AC011500.3
ENSG00000228350	-6.05778	-2.54858	0.000506039	0.0114738	LINC02585
ENSG00000271765	-6.05778	-2.54858	0.000506039	0.0114738	RN7SKP299
ENSG00000236494	-6.05778	-2.54858	0.000506039	0.0114738	AC008080.4
ENSG00000279407	-6.05778	-2.50822	0.000344676	0.00859211	AC007191.1
ENSG00000231613	-6.05778	-2.5096	0.000344676	0.00859211	AC099568.1
ENSG00000280221	-6.05778	-2.54777	0.000506039	0.0114738	#N/A
ENSG00000128652	-6.05778	-2.51235	0.000344676	0.00859211	HOXD3
ENSG00000255266	-6.05778	-2.54392	0.000506039	0.0114738	AP003484.1
ENSG00000274340	-6.05778	-2.54392	0.000506039	0.0114738	AC032011.1
ENSG00000155754	-6.05778	-2.49692	0.000344676	0.00859211	C2CD6
ENSG00000241560	-6.05778	-2.48312	0.000344676	0.00859211	ZBTB20-AS1
ENSG00000249706	-6.05778	-2.48312	0.000344676	0.00859211	AC105384.1
ENSG00000164122	-6.05778	-2.48312	0.000344676	0.00859211	ASB5
ENSG00000175967	-6.05778	-2.48312	0.000344676	0.00859211	FO393415.1
ENSG00000200058	-6.05778	-2.51951	0.000344676	0.00859211	RNA5SP218
ENSG00000213924	-6.05778	-2.48312	0.000344676	0.00859211	HNRNPH1P2
ENSG00000248100	-6.05778	-2.49554	0.000344676	0.00859211	AC087257.1
ENSG00000258354	-6.05778	-2.49141	0.000344676	0.00859211	AC138932.2
ENSG00000181013	-6.05778	-2.48312	0.000344676	0.00859211	#N/A
ENSG00000240270	-6.05778	-2.49278	0.000344676	0.00859211	RPL12P37
ENSG00000204532	-6.05778	-2.49416	0.000344676	0.00859211	ZSCAN5C
ENSG00000247872	-6.05778	-2.54367	0.000506039	0.0114738	SPCS2P3
ENSG00000249306	-6.05778	-2.56253	0.000506039	0.0114738	LINC01411
ENSG00000281641	-6.05778	-2.56253	0.000506039	0.0114738	SAMD12-AS1
ENSG00000223839	-6.05778	-2.54311	0.000506039	0.0114738	FAM95B1
ENSG00000252361	-6.05778	-2.57373	0.000506039	0.0114738	RNU6-118P
ENSG00000176236	-6.05778	-2.52059	0.000506039	0.0114738	RPP38-DT
ENSG00000167780	-6.05778	-2.53764	0.000506039	0.0114738	SOAT2
ENSG00000280117	-6.05778	-2.54255	0.000506039	0.0114738	AC122688.4
ENSG00000275322	-6.05778	-2.56253	0.000506039	0.0114738	AC103746.1
ENSG00000198211	-6.05778	-2.52556	0.000506039	0.0114738	AC092143.1
ENSG00000199053	-6.05778	-2.57373	0.000506039	0.0114738	MIR324
ENSG00000268047	-6.05778	-2.56718	0.000506039	0.0114738	AC018766.1
ENSG00000223553	-6.05778	-2.55788	0.000506039	0.0114738	SMPD4P1
ENSG00000271093	-6.05778	-2.52307	0.000506039	0.0114738	IGLCOR22-2
ENSG00000142623	-6.05778	-2.57973	0.000751093	0.0155326	PADI1
ENSG00000267561	-6.05778	-2.58572	0.000751093	0.0155326	AC093155.3
ENSG00000177551	-6.05778	-2.58572	0.000751093	0.0155326	NHLH2
ENSG00000162892	-6.05778	-2.58572	0.000751093	0.0155326	IL24
ENSG00000226036	-6.05778	-2.58572	0.000751093	0.0155326	AL590648.1
ENSG00000244020	-6.05778	-2.58572	0.000751093	0.0155326	MT1HL1
ENSG00000233694	-6.05778	-2.58572	0.000751093	0.0155326	LINC02579
ENSG00000239828	-6.05778	-2.58572	0.000751093	0.0155326	AC063944.1
ENSG00000223941	-6.05778	-2.58572	0.000751093	0.0155326	LINC01014
ENSG00000280871	-6.05778	-2.58572	0.000751093	0.0155326	#N/A
ENSG00000111886	-6.05778	-2.58572	0.000751093	0.0155326	GABRR2
ENSG00000254001	-6.05778	-2.58572	0.000751093	0.0155326	AC084706.1
ENSG00000199072	-6.05778	-2.58572	0.000751093	0.0155326	MIRLET7F1
ENSG00000255931	-6.05778	-2.58572	0.000751093	0.0155326	AP003108.1
ENSG00000185933	-6.05778	-2.58572	0.000751093	0.0155326	CALHM1
ENSG00000262031	-6.05778	-2.58572	0.000751093	0.0155326	LINC01974
ENSG00000266941	-6.05778	-2.58572	0.000751093	0.0155326	AC024592.1
ENSG00000276488	-6.05778	-2.58572	0.000751093	0.0155326	AC008735.4
ENSG00000217261	-6.05778	-2.58572	0.000751093	0.0155326	POM121L4P
ENSG00000211683	-6.05778	-2.58572	0.000751093	0.0155326	AP000346.1
ENSG00000121101	-6.03215	3.33676	5.71228e-17	1.82417e-13	TEX14
ENSG00000169429	-6.00827	3.49454	4.8796e-17	1.64483e-13	CXCL8
ENSG00000169900	-5.98043	-0.180353	2.34811e-09	6.53538e-07	PYDC1
ENSG00000213272	-5.97167	-2.58714	0.000506039	0.0114738	RPL7AP9
ENSG00000273724	-5.97167	-2.58714	0.000506039	0.0114738	AC106782.4
ENSG00000279208	-5.97167	-2.58714	0.000506039	0.0114738	CR381653.2
ENSG00000248890	-5.97167	-2.58855	0.000506039	0.0114738	HHIP-AS1
ENSG00000180209	-5.97167	-2.63978	0.000751093	0.0155326	MYLPF
ENSG00000280353	-5.97167	-2.63978	0.000751093	0.0155326	AC011466.4
ENSG00000280164	-5.97167	-2.63978	0.000751093	0.0155326	CU638689.5
ENSG00000273240	-5.97167	-2.63722	0.000751093	0.0155326	AC013468.1
ENSG00000226957	-5.97167	-2.59418	0.000506039	0.0114738	AL358075.1
ENSG00000237993	-5.97167	-2.59418	0.000506039	0.0114738	AL365318.1
ENSG00000227890	-5.97167	-2.59418	0.000506039	0.0114738	PSMA2P3
ENSG00000251155	-5.97167	-2.59418	0.000506039	0.0114738	SEPTIN14P4
ENSG00000223701	-5.97167	-2.59418	0.000506039	0.0114738	RAET1E-AS1
ENSG00000224185	-5.97167	-2.59418	0.000506039	0.0114738	SNX18P9
ENSG00000255092	-5.97167	-2.59418	0.000506039	0.0114738	AC010768.2
ENSG00000148377	-5.97167	-2.59418	0.000506039	0.0114738	IDI2
ENSG00000260589	-5.97167	-2.59418	0.000506039	0.0114738	STAM-AS1
ENSG00000224301	-5.97167	-2.59418	0.000506039	0.0114738	AL590502.1
ENSG00000270874	-5.97167	-2.59418	0.000506039	0.0114738	RPAP2P1
ENSG00000257940	-5.97167	-2.59418	0.000506039	0.0114738	AC079598.1
ENSG00000211896	-5.97167	-2.59418	0.000506039	0.0114738	IGHG1
ENSG00000073598	-5.97167	-2.59418	0.000506039	0.0114738	FNDC8
ENSG00000185897	-5.97167	-2.59418	0.000506039	0.0114738	FFAR3
ENSG00000274333	-5.97167	-2.59418	0.000506039	0.0114738	CU633967.1
ENSG00000248150	-5.97167	-2.5965	0.000506039	0.0114738	LINC02150
ENSG00000260038	-5.97167	-2.63501	0.000751093	0.0155326	AC009090.1
ENSG00000272426	-5.97167	-2.6027	0.000506039	0.0114738	BX284668.6
ENSG00000223263	-5.97167	-2.57163	0.000506039	0.0114738	RNU6-387P
ENSG00000242412	-5.97167	-2.57163	0.000506039	0.0114738	DBIL5P2
ENSG00000225808	-5.97167	-2.57163	0.000506039	0.0114738	DNAJC19P5
ENSG00000178055	-5.97167	-2.60774	0.000506039	0.0114738	PRSS42P
ENSG00000249737	-5.97167	-2.57163	0.000506039	0.0114738	AC020980.1
ENSG00000249069	-5.97167	-2.57163	0.000506039	0.0114738	LINC01033
ENSG00000250853	-5.97167	-2.57163	0.000506039	0.0114738	RNF138P1
ENSG00000251556	-5.97167	-2.57163	0.000506039	0.0114738	AC091887.1
ENSG00000164430	-5.97167	-2.57163	0.000506039	0.0114738	CGAS
ENSG00000223967	-5.97167	-2.57163	0.000506039	0.0114738	AL603910.2
ENSG00000136274	-5.97167	-2.57304	0.000506039	0.0114738	NACAD
ENSG00000173698	-5.97167	-2.57163	0.000506039	0.0114738	ADGRG2
ENSG00000136573	-5.97167	-2.57163	0.000506039	0.0114738	BLK
ENSG00000186652	-5.97167	-2.57587	0.000506039	0.0114738	PRG2
ENSG00000139540	-5.97167	-2.57304	0.000506039	0.0114738	SLC39A5
ENSG00000199804	-5.97167	-2.57163	0.000506039	0.0114738	RNA5SP383
ENSG00000196273	-5.97167	-2.57163	0.000506039	0.0114738	LINC00523
ENSG00000129226	-5.97167	-2.58549	0.000506039	0.0114738	CD68
ENSG00000229728	-5.97167	-2.57869	0.000506039	0.0114738	AL136531.1
ENSG00000125787	-5.97167	-2.60411	0.000506039	0.0114738	GNRH2
ENSG00000278367	-5.97167	-2.57163	0.000506039	0.0114738	AL356652.1
ENSG00000187905	-5.97167	-2.58068	0.000506039	0.0114738	LRRC74B
ENSG00000175697	-5.97167	-2.63106	0.000751093	0.0155326	GPR156
ENSG00000198857	-5.97167	-2.6089	0.000751093	0.0155326	HSD3BP5
ENSG00000261250	-5.97167	-2.64675	0.000751093	0.0155326	AL160286.3
ENSG00000253326	-5.97167	-2.62127	0.000751093	0.0155326	AL606534.4
ENSG00000042832	-5.97167	-2.62407	0.000751093	0.0155326	TG
ENSG00000234840	-5.97167	-2.61509	0.000751093	0.0155326	LINC01239
ENSG00000230516	-5.97167	-2.65209	0.000751093	0.0155326	AL589642.2
ENSG00000197506	-5.97167	-2.62291	0.000751093	0.0155326	SLC28A3
ENSG00000185863	-5.97167	-2.62127	0.000751093	0.0155326	TMEM210
ENSG00000165511	-5.97167	-2.62291	0.000751093	0.0155326	C10orf25
ENSG00000228527	-5.97167	-2.6089	0.000751093	0.0155326	AC016396.1
ENSG00000259751	-5.97167	-2.65823	0.000751093	0.0155326	AC018868.2
ENSG00000184502	-5.97167	-2.64536	0.000751093	0.0155326	GAST
ENSG00000278219	-5.97167	-2.6089	0.000751093	0.0155326	#N/A
ENSG00000269220	-5.97167	-2.6117	0.000751093	0.0155326	LINC00528
ENSG00000249680	-5.97167	-2.61509	0.000751093	0.0155326	TUBA3GP
ENSG00000224426	-5.97167	-2.67049	0.00112777	0.0209321	SLC31A1P1
ENSG00000204390	-5.97167	-2.67049	0.00112777	0.0209321	HSPA1L
ENSG00000231794	-5.97167	-2.67049	0.00112777	0.0209321	AC009542.1
ENSG00000273419	-5.97167	-2.67049	0.00112777	0.0209321	AC004877.1
ENSG00000253111	-5.97167	-2.67049	0.00112777	0.0209321	AC091114.1
ENSG00000202314	-5.97167	-2.67049	0.00112777	0.0209321	SNORD6
ENSG00000212743	-5.97167	-2.67049	0.00112777	0.0209321	LINC02656
ENSG00000203942	-5.97167	-2.67049	0.00112777	0.0209321	C10orf62
ENSG00000260944	-5.97167	-2.67049	0.00112777	0.0209321	FOXC2-AS1
ENSG00000267202	-5.97167	-2.67049	0.00112777	0.0209321	AC090386.1
ENSG00000167077	-5.97167	-2.67049	0.00112777	0.0209321	MEI1
ENSG00000258893	-5.88009	-2.73565	0.00112777	0.0209321	SETP2
ENSG00000271989	-5.88009	-2.67883	0.000751093	0.0155326	AL139424.1
ENSG00000120937	-5.88009	-2.67883	0.000751093	0.0155326	NPPB
ENSG00000212541	-5.88009	-2.68027	0.000751093	0.0155326	RNU6-510P
ENSG00000272104	-5.88009	-2.68027	0.000751093	0.0155326	Z84492.1
ENSG00000278635	-5.88009	-2.68171	0.000751093	0.0155326	AC141557.2
ENSG00000263781	-5.88009	-2.68171	0.000751093	0.0155326	AC024619.4
ENSG00000233048	-5.88009	-2.73158	0.00112777	0.0209321	LINC01722
ENSG00000283122	-5.88009	-2.68497	0.000751093	0.0155326	HYMAI
ENSG00000228510	-5.88009	-2.72934	0.00112777	0.0209321	AL359091.2
ENSG00000188800	-5.88009	-2.68747	0.000751093	0.0155326	TMCO2
ENSG00000178965	-5.88009	-2.68747	0.000751093	0.0155326	ERICH3
ENSG00000231648	-5.88009	-2.68747	0.000751093	0.0155326	LINC01698
ENSG00000250889	-5.88009	-2.68747	0.000751093	0.0155326	#N/A
ENSG00000188921	-5.88009	-2.68747	0.000751093	0.0155326	HACD4
ENSG00000196566	-5.88009	-2.68747	0.000751093	0.0155326	AL138767.1
ENSG00000258788	-5.88009	-2.68747	0.000751093	0.0155326	CKS1BP1
ENSG00000263257	-5.88009	-2.68747	0.000751093	0.0155326	AC040173.1
ENSG00000221020	-5.88009	-2.68747	0.000751093	0.0155326	#N/A
ENSG00000240589	-5.88009	-2.68747	0.000751093	0.0155326	RN7SL258P
ENSG00000267731	-5.88009	-2.68747	0.000751093	0.0155326	AC005332.2
ENSG00000268499	-5.88009	-2.68747	0.000751093	0.0155326	AC011479.2
ENSG00000262873	-5.88009	-2.68868	0.000751093	0.0155326	AC127496.5
ENSG00000165805	-5.88009	-2.69133	0.000751093	0.0155326	C12orf50
ENSG00000183281	-5.88009	-2.69277	0.000751093	0.0155326	PLGLB1
ENSG00000226279	-5.88009	-2.69095	0.000751093	0.0155326	RPL12P10
ENSG00000204362	-5.88009	-2.66585	0.000751093	0.0155326	LINC02783
ENSG00000163017	-5.88009	-2.67739	0.000751093	0.0155326	ACTG2
ENSG00000233671	-5.88009	-2.67162	0.000751093	0.0155326	AC083899.2
ENSG00000250075	-5.88009	-2.6973	0.000751093	0.0155326	AC104806.2
ENSG00000086570	-5.88009	-2.66585	0.000751093	0.0155326	FAT2
ENSG00000272374	-5.88009	-2.66585	0.000751093	0.0155326	Z97832.2
ENSG00000230225	-5.88009	-2.66585	0.000751093	0.0155326	MTND5P14
ENSG00000254664	-5.88009	-2.66585	0.000751093	0.0155326	AC103681.2
ENSG00000257002	-5.88009	-2.67307	0.000751093	0.0155326	AP000438.1
ENSG00000182985	-5.88009	-2.66585	0.000751093	0.0155326	CADM1
ENSG00000207327	-5.88009	-2.66585	0.000751093	0.0155326	RNU6-883P
ENSG00000151067	-5.88009	-2.67595	0.000751093	0.0155326	CACNA1C
ENSG00000132965	-5.88009	-2.66585	0.000751093	0.0155326	ALOX5AP
ENSG00000260388	-5.88009	-2.67451	0.000751093	0.0155326	LINC00562
ENSG00000184304	-5.88009	-2.66585	0.000751093	0.0155326	PRKD1
ENSG00000189051	-5.88009	-2.69769	0.000751093	0.0155326	RNF222
ENSG00000251537	-5.88009	-2.66585	0.000751093	0.0155326	AC005324.3
ENSG00000270614	-5.88009	-2.66585	0.000751093	0.0155326	AC011451.2
ENSG00000267943	-5.88009	-2.66585	0.000751093	0.0155326	AC010328.1
ENSG00000267122	-5.88009	-2.72302	0.00112777	0.0209321	AC004490.1
ENSG00000134249	-5.88009	-2.7608	0.00112777	0.0209321	ADAM30
ENSG00000279306	-5.88009	-2.7608	0.00112777	0.0209321	AL139288.2
ENSG00000232490	-5.88009	-2.7608	0.00112777	0.0209321	OSBPL10-AS1
ENSG00000144847	-5.88009	-2.7608	0.00112777	0.0209321	IGSF11
ENSG00000242337	-5.88009	-2.7608	0.00112777	0.0209321	INHCAP
ENSG00000251600	-5.88009	-2.7608	0.00112777	0.0209321	AC107223.1
ENSG00000271795	-5.88009	-2.70629	0.00112777	0.0209321	AC011337.1
ENSG00000171217	-5.88009	-2.7608	0.00112777	0.0209321	CLDN20
ENSG00000243004	-5.88009	-2.7608	0.00112777	0.0209321	AC005062.1
ENSG00000232922	-5.88009	-2.7608	0.00112777	0.0209321	MTND6P24
ENSG00000215120	-5.88009	-2.7608	0.00112777	0.0209321	AL590763.1
ENSG00000253521	-5.88009	-2.7608	0.00112777	0.0209321	HPYR1
ENSG00000147852	-5.88009	-2.70403	0.00112777	0.0209321	VLDLR
ENSG00000137731	-5.88009	-2.7608	0.00112777	0.0209321	FXYD2
ENSG00000138308	-5.88009	-2.7608	0.00112777	0.0209321	PLA2G12B
ENSG00000256844	-5.88009	-2.7608	0.00112777	0.0209321	MEF2BNBP1
ENSG00000274315	-5.88009	-2.71037	0.00112777	0.0209321	AC009318.3
ENSG00000129465	-5.88009	-2.7608	0.00112777	0.0209321	RIPK3
ENSG00000258790	-5.88009	-2.71895	0.00112777	0.0209321	AL121594.1
ENSG00000277440	-5.88009	-2.74195	0.00112777	0.0209321	AC012676.4
ENSG00000255185	-5.88009	-2.71037	0.00112777	0.0209321	PDXDC2P
ENSG00000167914	-5.88009	-2.7608	0.00112777	0.0209321	GSDMA
ENSG00000273272	-5.88009	-2.75108	0.00112777	0.0209321	U62317.4
ENSG00000228107	-5.88009	-2.7608	0.00112777	0.0209321	AP000692.1
ENSG00000228137	-5.88009	-2.7608	0.00112777	0.0209321	AP001469.2
ENSG00000137801	-5.85681	5.83239	1.61664e-17	7.00641e-14	THBS1
ENSG00000170458	-5.84808	3.03886	6.60463e-15	1.33579e-11	CD14
ENSG00000152931	-5.7823	-2.83244	0.00171422	0.028233	PART1
ENSG00000271871	-5.7823	-2.77984	0.00112777	0.0209321	AC005740.4
ENSG00000255158	-5.7823	-2.83162	0.00171422	0.028233	AC131934.1
ENSG00000169629	-5.7823	-2.78279	0.00112777	0.0209321	RGPD8
ENSG00000179342	-5.7823	-2.78279	0.00112777	0.0209321	AC008267.1
ENSG00000005471	-5.7823	-2.78279	0.00112777	0.0209321	ABCB4
ENSG00000234993	-5.7823	-2.78279	0.00112777	0.0209321	CUBNP2
ENSG00000258017	-5.7823	-2.78279	0.00112777	0.0209321	AC011603.2
ENSG00000185615	-5.7823	-2.78279	0.00112777	0.0209321	PDIA2
ENSG00000244641	-5.7823	-2.78426	0.00112777	0.0209321	RPS26P43
ENSG00000077935	-5.7823	-2.78617	0.00112777	0.0209321	SMC1B
ENSG00000250033	-5.7823	-2.78573	0.00112777	0.0209321	SLC7A11-AS1
ENSG00000197273	-5.7823	-2.7872	0.00112777	0.0209321	GUCA2A
ENSG00000242267	-5.7823	-2.7872	0.00112777	0.0209321	SKINT1L
ENSG00000237852	-5.7823	-2.7872	0.00112777	0.0209321	AC119800.1
ENSG00000162631	-5.7823	-2.7872	0.00112777	0.0209321	NTNG1
ENSG00000189030	-5.7823	-2.7872	0.00112777	0.0209321	VHLL
ENSG00000211592	-5.7823	-2.7872	0.00112777	0.0209321	IGKC
ENSG00000235258	-5.7823	-2.7872	0.00112777	0.0209321	NDUFB4P6
ENSG00000232766	-5.7823	-2.7872	0.00112777	0.0209321	AC098614.2
ENSG00000242094	-5.7823	-2.7872	0.00112777	0.0209321	FOXP1-IT1
ENSG00000250673	-5.7823	-2.7872	0.00112777	0.0209321	REELD1
ENSG00000221716	-5.7823	-2.7872	0.00112777	0.0209321	SNORA11
ENSG00000272457	-5.7823	-2.7872	0.00112777	0.0209321	AC113194.1
ENSG00000274841	-5.7823	-2.7872	0.00112777	0.0209321	Metazoa_SRP
ENSG00000232807	-5.7823	-2.7872	0.00112777	0.0209321	AL137186.2
ENSG00000136750	-5.7823	-2.7872	0.00112777	0.0209321	GAD2
ENSG00000179774	-5.7823	-2.7872	0.00112777	0.0209321	ATOH7
ENSG00000257859	-5.7823	-2.7872	0.00112777	0.0209321	CASC18
ENSG00000279171	-5.7823	-2.7872	0.00112777	0.0209321	AC006065.6
ENSG00000256022	-5.7823	-2.7872	0.00112777	0.0209321	LINC02411
ENSG00000261996	-5.7823	-2.7872	0.00112777	0.0209321	AC004706.1
ENSG00000126561	-5.7823	-2.7872	0.00112777	0.0209321	STAT5A
ENSG00000275530	-5.7823	-2.78784	0.00112777	0.0209321	#N/A
ENSG00000281420	-5.7823	-2.7872	0.00112777	0.0209321	AP001052.1
ENSG00000158427	-5.7823	-2.82516	0.00171422	0.028233	TMSB15B
ENSG00000261915	-5.7823	-2.82452	0.00171422	0.028233	AC026954.2
ENSG00000235672	-5.7823	-2.82243	0.00171422	0.028233	AC090286.3
ENSG00000229988	-5.7823	-2.79205	0.00112777	0.0209321	HBBP1
ENSG00000267303	-5.7823	-2.79269	0.00112777	0.0209321	AC011511.4
ENSG00000230849	-5.7823	-2.76656	0.00112777	0.0209321	GOT2P2
ENSG00000143355	-5.7823	-2.76656	0.00112777	0.0209321	LHX9
ENSG00000234584	-5.7823	-2.77689	0.00112777	0.0209321	AC019186.1
ENSG00000224346	-5.7823	-2.77689	0.00112777	0.0209321	BICD1P1
ENSG00000248360	-5.7823	-2.76656	0.00112777	0.0209321	LINC00504
ENSG00000185056	-5.7823	-2.77837	0.00112777	0.0209321	C5orf47
ENSG00000279368	-5.7823	-2.77837	0.00112777	0.0209321	AL031123.3
ENSG00000204296	-5.7823	-2.76656	0.00112777	0.0209321	TSBP1
ENSG00000112053	-5.7823	-2.76656	0.00112777	0.0209321	SLC26A8
ENSG00000218363	-5.7823	-2.76656	0.00112777	0.0209321	SLC25A20P1
ENSG00000159167	-5.7823	-2.77099	0.00112777	0.0209321	STC1
ENSG00000253356	-5.7823	-2.76656	0.00112777	0.0209321	AC084024.3
ENSG00000234323	-5.7823	-2.76656	0.00112777	0.0209321	LINC01505
ENSG00000246174	-5.7823	-2.76656	0.00112777	0.0209321	KCTD21-AS1
ENSG00000204403	-5.7823	-2.76656	0.00112777	0.0209321	CASP12
ENSG00000165495	-5.7823	-2.7992	0.00112777	0.0209321	PKNOX2
ENSG00000230573	-5.7823	-2.76656	0.00112777	0.0209321	LINC02639
ENSG00000156886	-5.7823	-2.80233	0.00112777	0.0209321	ITGAD
ENSG00000240338	-5.7823	-2.7994	0.00112777	0.0209321	AC009078.2
ENSG00000261868	-5.7823	-2.76656	0.00112777	0.0209321	MFSD1P1
ENSG00000173714	-5.7823	-2.77542	0.00112777	0.0209321	WFIKKN2
ENSG00000266717	-5.7823	-2.76656	0.00112777	0.0209321	AC134407.1
ENSG00000229999	-5.7823	-2.76656	0.00112777	0.0209321	AL022238.2
ENSG00000229635	-5.7823	-2.8574	0.00171422	0.028233	AL137159.1
ENSG00000237522	-5.7823	-2.83808	0.00171422	0.028233	NONOP2
ENSG00000260868	-5.7823	-2.8574	0.00171422	0.028233	LINC01960
ENSG00000223899	-5.7823	-2.8574	0.00171422	0.028233	SEC13P1
ENSG00000243197	-5.7823	-2.8574	0.00171422	0.028233	TUSC7
ENSG00000230732	-5.7823	-2.81868	0.00171422	0.028233	AC016949.1
ENSG00000261761	-5.7823	-2.8574	0.00171422	0.028233	LINC02616
ENSG00000224560	-5.7823	-2.8574	0.00171422	0.028233	AC108043.1
ENSG00000186952	-5.7823	-2.8574	0.00171422	0.028233	TMEM232
ENSG00000205653	-5.7823	-2.8574	0.00171422	0.028233	AL035696.1
ENSG00000228124	-5.7823	-2.8574	0.00171422	0.028233	AL096678.1
ENSG00000237650	-5.7823	-2.8574	0.00171422	0.028233	OR11Q1P
ENSG00000261618	-5.7823	-2.81741	0.00171422	0.028233	LINC02605
ENSG00000176007	-5.7823	-2.8574	0.00171422	0.028233	FAM220BP
ENSG00000228376	-5.7823	-2.84244	0.00171422	0.028233	GAS2L1P2
ENSG00000183695	-5.7823	-2.8574	0.00171422	0.028233	MRGPRX2
ENSG00000246211	-5.7823	-2.8574	0.00171422	0.028233	P4HA3-AS1
ENSG00000178440	-5.7823	-2.8574	0.00171422	0.028233	TIMM23B-AGAP6
ENSG00000165863	-5.7823	-2.808	0.00171422	0.028233	C10orf82
ENSG00000171840	-5.7823	-2.8574	0.00171422	0.028233	NINJ2
ENSG00000276058	-5.7823	-2.81868	0.00171422	0.028233	STMN1P1
ENSG00000188906	-5.7823	-2.8574	0.00171422	0.028233	LRRK2
ENSG00000223576	-5.7823	-2.81741	0.00171422	0.028233	AL355001.1
ENSG00000225163	-5.7823	-2.8574	0.00171422	0.028233	LINC00618
ENSG00000259205	-5.7823	-2.80443	0.00171422	0.028233	PRKXP1
ENSG00000276867	-5.7823	-2.8574	0.00171422	0.028233	AC074050.4
ENSG00000263946	-5.7823	-2.8574	0.00171422	0.028233	AC015818.3
ENSG00000262339	-5.7823	-2.8574	0.00171422	0.028233	AC130371.1
ENSG00000269505	-5.7823	-2.8574	0.00171422	0.028233	ZNF92P2
ENSG00000254887	-5.7823	-2.8574	0.00171422	0.028233	AC010247.1
ENSG00000262874	-5.7823	-2.84453	0.00171422	0.028233	C19orf84
ENSG00000184809	-5.7823	-2.8574	0.00171422	0.028233	B3GALT5-AS1
ENSG00000138356	-5.7705	0.945751	7.93925e-12	5.29356e-09	AOX1
ENSG00000118523	-5.73052	5.76776	1.38719e-16	3.8258e-13	CCN2
ENSG00000257511	-5.71829	-0.475934	2.37239e-08	4.52088e-06	AC084824.1
ENSG00000180353	-5.70709	1.28048	6.59575e-12	4.59997e-09	HCLS1
ENSG00000204264	-5.69976	0.412126	6.63221e-10	2.26073e-07	PSMB8
ENSG00000101307	-5.6774	-2.88748	0.00171422	0.028233	SIRPB1
ENSG00000265480	-5.6774	-2.88814	0.00171422	0.028233	KRT18P55
ENSG00000242198	-5.6774	-2.88832	0.00171422	0.028233	AC008897.1
ENSG00000214992	-5.6774	-2.88832	0.00171422	0.028233	AKAP17BP
ENSG00000229759	-5.6774	-2.93563	0.00263982	0.0392384	MRPS18AP1
ENSG00000106328	-5.6774	-2.88983	0.00171422	0.028233	FSCN3
ENSG00000178734	-5.6774	-2.93481	0.00263982	0.0392384	LMO7DN
ENSG00000272690	-5.6774	-2.89133	0.00171422	0.028233	LINC02018
ENSG00000278820	-5.6774	-2.89133	0.00171422	0.028233	#N/A
ENSG00000237945	-5.6774	-2.89133	0.00171422	0.028233	LINC00649
ENSG00000154027	-5.6774	-2.89284	0.00171422	0.028233	AK5
ENSG00000226266	-5.6774	-2.89484	0.00171422	0.028233	AC009961.1
ENSG00000205847	-5.6774	-2.89435	0.00171422	0.028233	OR7E91P
ENSG00000229468	-5.6774	-2.89435	0.00171422	0.028233	RPL39P18
ENSG00000248545	-5.6774	-2.89435	0.00171422	0.028233	AC105290.1
ENSG00000250584	-5.6774	-2.89435	0.00171422	0.028233	LINC01511
ENSG00000249894	-5.6774	-2.89435	0.00171422	0.028233	AC024581.1
ENSG00000133710	-5.6774	-2.89435	0.00171422	0.028233	SPINK5
ENSG00000259826	-5.6774	-2.89435	0.00171422	0.028233	AC072061.1
ENSG00000282164	-5.6774	-2.89435	0.00171422	0.028233	PEG13
ENSG00000224416	-5.6774	-2.89435	0.00171422	0.028233	IFNA22P
ENSG00000224067	-5.6774	-2.89435	0.00171422	0.028233	AL354877.1
ENSG00000213277	-5.6774	-2.89435	0.00171422	0.028233	MARCKSL1P1
ENSG00000250432	-5.6774	-2.89435	0.00171422	0.028233	FAM242C
ENSG00000257654	-5.6774	-2.89435	0.00171422	0.028233	AC125603.1
ENSG00000280580	-5.6774	-2.89435	0.00171422	0.028233	LINC02342
ENSG00000250365	-5.6774	-2.89435	0.00171422	0.028233	AL139353.2
ENSG00000183484	-5.6774	-2.89435	0.00171422	0.028233	GPR132
ENSG00000259542	-5.6774	-2.89435	0.00171422	0.028233	AC087477.5
ENSG00000260668	-5.6774	-2.89435	0.00171422	0.028233	AC093536.1
ENSG00000265478	-5.6774	-2.89435	0.00171422	0.028233	AC107982.3
ENSG00000263107	-5.6774	-2.89435	0.00171422	0.028233	AC025627.2
ENSG00000167434	-5.6774	-2.89435	0.00171422	0.028233	CA4
ENSG00000154258	-5.6774	-2.89435	0.00171422	0.028233	ABCA9
ENSG00000280220	-5.6774	-2.89435	0.00171422	0.028233	AL157414.3
ENSG00000267924	-5.6774	-2.89435	0.00171422	0.028233	AC139769.2
ENSG00000272056	-5.6774	-2.89785	0.00171422	0.028233	AC013472.3
ENSG00000204614	-5.6774	-2.90153	0.00171422	0.028233	TRIM40
ENSG00000206448	-5.6774	-2.90153	0.00171422	0.028233	PPIAP30
ENSG00000166743	-5.6774	-2.90153	0.00171422	0.028233	ACSM1
ENSG00000224315	-5.6774	-2.87472	0.00171422	0.028233	RPL7P7
ENSG00000237938	-5.6774	-2.87472	0.00171422	0.028233	AL450998.3
ENSG00000279230	-5.6774	-2.87472	0.00171422	0.028233	#N/A
ENSG00000223575	-5.6774	-2.87472	0.00171422	0.028233	RBMX2P3
ENSG00000274963	-5.6774	-2.87472	0.00171422	0.028233	RN7SL600P
ENSG00000234614	-5.6774	-2.87472	0.00171422	0.028233	C2CD4D-AS1
ENSG00000200674	-5.6774	-2.87472	0.00171422	0.028233	RN7SKP160
ENSG00000244414	-5.6774	-2.87472	0.00171422	0.028233	CFHR1
ENSG00000271680	-5.6774	-2.87472	0.00171422	0.028233	AC098935.2
ENSG00000227591	-5.6774	-2.90821	0.00171422	0.028233	HSD11B1-AS1
ENSG00000229399	-5.6774	-2.88379	0.00171422	0.028233	AL592148.1
ENSG00000242561	-5.6774	-2.87472	0.00171422	0.028233	ATP5MGP5
ENSG00000220343	-5.6774	-2.87472	0.00171422	0.028233	PPIAP74
ENSG00000249947	-5.6774	-2.87472	0.00171422	0.028233	XBP1P1
ENSG00000279926	-5.6774	-2.88077	0.00171422	0.028233	AL138831.3
ENSG00000274494	-5.6774	-2.87472	0.00171422	0.028233	MIR6832
ENSG00000227719	-5.6774	-2.8853	0.00171422	0.028233	AC006042.1
ENSG00000279437	-5.6774	-2.87472	0.00171422	0.028233	Z82170.1
ENSG00000199133	-5.6774	-2.88228	0.00171422	0.028233	MIRLET7D
ENSG00000254978	-5.6774	-2.87623	0.00171422	0.028233	ALG1L9P
ENSG00000110203	-5.6774	-2.91054	0.00171422	0.028233	FOLR3
ENSG00000254873	-5.6774	-2.88228	0.00171422	0.028233	AP001267.1
ENSG00000257354	-5.6774	-2.87472	0.00171422	0.028233	AC048341.1
ENSG00000279816	-5.6774	-2.87472	0.00171422	0.028233	#N/A
ENSG00000135702	-5.6774	-2.90821	0.00171422	0.028233	CHST5
ENSG00000241157	-5.6774	-2.87472	0.00171422	0.028233	AC104763.1
ENSG00000205856	-5.6774	-2.90987	0.00171422	0.028233	C22orf42
ENSG00000233056	-5.6774	-2.87472	0.00171422	0.028233	ERVH48-1
ENSG00000208036	-5.6774	-2.92817	0.00263982	0.0392384	MIR106B
ENSG00000235098	-5.6774	-2.91487	0.00263982	0.0392384	ANKRD65
ENSG00000258465	-5.6774	-2.96124	0.00263982	0.0392384	AL139011.2
ENSG00000135744	-5.6774	-2.96124	0.00263982	0.0392384	AGT
ENSG00000157856	-5.6774	-2.94143	0.00263982	0.0392384	DRC1
ENSG00000066032	-5.6774	-2.96124	0.00263982	0.0392384	CTNNA2
ENSG00000182187	-5.6774	-2.96124	0.00263982	0.0392384	CRYGB
ENSG00000269894	-5.6774	-2.96124	0.00263982	0.0392384	AC018809.1
ENSG00000213509	-5.6774	-2.95613	0.00263982	0.0392384	PPIAP16
ENSG00000239005	-5.6774	-2.96124	0.00263982	0.0392384	AC097376.1
ENSG00000186493	-5.6774	-2.96124	0.00263982	0.0392384	C5orf38
ENSG00000113302	-5.6774	-2.94805	0.00263982	0.0392384	IL12B
ENSG00000234817	-5.6774	-2.94805	0.00263982	0.0392384	AL136309.2
ENSG00000207757	-5.6774	-2.96124	0.00263982	0.0392384	MIR93
ENSG00000199226	-5.6774	-2.96124	0.00263982	0.0392384	RNU6-50P
ENSG00000269993	-5.6774	-2.96124	0.00263982	0.0392384	KC877982.1
ENSG00000214897	-5.6774	-2.9459	0.00263982	0.0392384	PNMA6E
ENSG00000281491	-5.6774	-2.96124	0.00263982	0.0392384	DNAJB5-DT
ENSG00000129744	-5.6774	-2.94805	0.00263982	0.0392384	ART1
ENSG00000255434	-5.6774	-2.96124	0.00263982	0.0392384	AP001922.6
ENSG00000226676	-5.6774	-2.96124	0.00263982	0.0392384	LINC02679
ENSG00000256271	-5.6774	-2.96124	0.00263982	0.0392384	CACNA1C-AS2
ENSG00000261375	-5.6774	-2.96124	0.00263982	0.0392384	AC135983.4
ENSG00000223313	-5.6774	-2.91487	0.00263982	0.0392384	RNU6-516P
ENSG00000262420	-5.6774	-2.96124	0.00263982	0.0392384	AC007613.1
ENSG00000279476	-5.6774	-2.9172	0.00263982	0.0392384	AC092139.3
ENSG00000277501	-5.6774	-2.96124	0.00263982	0.0392384	AC243571.2
ENSG00000232938	-5.6774	-2.96124	0.00263982	0.0392384	RPL23AP87
ENSG00000279962	-5.6774	-2.96124	0.00263982	0.0392384	AP001525.1
ENSG00000226144	-5.6774	-2.96124	0.00263982	0.0392384	RPS27AP3
ENSG00000268460	-5.6774	-2.91504	0.00263982	0.0392384	AC006262.1
ENSG00000280011	-5.6774	-2.96124	0.00263982	0.0392384	AL031595.2
ENSG00000223730	-5.6774	-2.91487	0.00263982	0.0392384	Z83838.1
ENSG00000102109	-5.67662	-0.537773	3.83098e-08	6.42112e-06	PCSK1N
ENSG00000267530	-5.63372	-0.559902	3.83098e-08	6.42112e-06	LINC01836
ENSG00000144583	-5.60177	0.824525	9.61797e-11	4.355e-08	38047
ENSG00000205853	-5.57811	1.46133	1.26731e-12	1.08301e-09	RFPL3S
ENSG00000231871	-5.56427	-3.0039	0.00263982	0.0392384	IPO9-AS1
ENSG00000255222	-5.56427	-3.0039	0.00263982	0.0392384	SETP17
ENSG00000256894	-5.56427	-3.0039	0.00263982	0.0392384	AC022509.3
ENSG00000279662	-5.56427	-3.0039	0.00263982	0.0392384	AC131649.2
ENSG00000270265	-5.56427	-3.00531	0.00263982	0.0392384	AC104819.3
ENSG00000198237	-5.56427	-3.00531	0.00263982	0.0392384	AC131392.1
ENSG00000125872	-5.56427	-3.00545	0.00263982	0.0392384	LRRN4
ENSG00000273493	-5.56427	-3.00854	0.00263982	0.0392384	AC098479.1
ENSG00000230697	-5.56427	-3.01008	0.00263982	0.0392384	SAP18P3
ENSG00000276147	-5.56427	-3.01008	0.00263982	0.0392384	MIR548AY
ENSG00000269889	-5.56427	-3.01008	0.00263982	0.0392384	AC078802.1
ENSG00000246214	-5.56427	-3.01008	0.00263982	0.0392384	AC024588.1
ENSG00000241739	-5.56427	-3.01008	0.00263982	0.0392384	AC010469.2
ENSG00000170271	-5.56427	-3.01008	0.00263982	0.0392384	FAXDC2
ENSG00000244476	-5.56427	-3.01008	0.00263982	0.0392384	ERVFRD-1
ENSG00000204472	-5.56427	-3.01008	0.00263982	0.0392384	AIF1
ENSG00000281593	-5.56427	-3.01008	0.00263982	0.0392384	AC006978.2
ENSG00000105967	-5.56427	-3.01008	0.00263982	0.0392384	TFEC
ENSG00000207291	-5.56427	-3.01008	0.00263982	0.0392384	RNU6-30P
ENSG00000253620	-5.56427	-3.01008	0.00263982	0.0392384	AC144568.1
ENSG00000272159	-5.56427	-3.01008	0.00263982	0.0392384	AC087623.3
ENSG00000253636	-5.56427	-3.01008	0.00263982	0.0392384	AC022893.1
ENSG00000254965	-5.56427	-3.01008	0.00263982	0.0392384	C1DP5
ENSG00000126838	-5.56427	-3.01008	0.00263982	0.0392384	PZP
ENSG00000258599	-5.56427	-3.01008	0.00263982	0.0392384	AL355922.2
ENSG00000233614	-5.56427	-3.01008	0.00263982	0.0392384	DDX11L10
ENSG00000265386	-5.56427	-3.01008	0.00263982	0.0392384	RN7SL219P
ENSG00000261266	-5.56427	-3.01008	0.00263982	0.0392384	AC008870.3
ENSG00000264743	-5.56427	-3.01008	0.00263982	0.0392384	DPRXP4
ENSG00000207736	-5.56427	-3.01008	0.00263982	0.0392384	MIR657
ENSG00000179603	-5.56427	-3.0154	0.00263982	0.0392384	GRM8
ENSG00000169442	-5.56427	-2.99927	0.00263982	0.0392384	CD52
ENSG00000183347	-5.56427	-2.99152	0.00263982	0.0392384	GBP6
ENSG00000116690	-5.56427	-3.02603	0.00263982	0.0392384	PRG4
ENSG00000228982	-5.56427	-2.99152	0.00263982	0.0392384	AL627095.1
ENSG00000223962	-5.56427	-2.99842	0.00263982	0.0392384	UBBP3
ENSG00000243396	-5.56427	-3.00081	0.00263982	0.0392384	AC084198.1
ENSG00000182000	-5.56427	-2.99152	0.00263982	0.0392384	PPIAP73
ENSG00000250900	-5.56427	-3.02589	0.00263982	0.0392384	AC008443.6
ENSG00000225864	-5.56427	-2.99152	0.00263982	0.0392384	AL645939.1
ENSG00000233306	-5.56427	-2.99152	0.00263982	0.0392384	TRGV2
ENSG00000240720	-5.56427	-3.02589	0.00263982	0.0392384	LRRD1
ENSG00000196440	-5.56427	-2.99152	0.00263982	0.0392384	ARMCX4
ENSG00000046774	-5.56427	-2.99152	0.00263982	0.0392384	MAGEC2
ENSG00000107014	-5.56427	-3.00236	0.00263982	0.0392384	RLN2
ENSG00000207276	-5.56427	-2.99772	0.00263982	0.0392384	RNU6-1160P
ENSG00000228544	-5.56427	-2.99927	0.00263982	0.0392384	CCDC183-AS1
ENSG00000223735	-5.56427	-2.99152	0.00263982	0.0392384	OR51B3P
ENSG00000255666	-5.56427	-3.00081	0.00263982	0.0392384	LINC02700
ENSG00000225423	-5.56427	-2.99152	0.00263982	0.0392384	TNPO1P1
ENSG00000134538	-5.56427	-2.99152	0.00263982	0.0392384	SLCO1B1
ENSG00000257475	-5.56427	-3.02673	0.00263982	0.0392384	AC068888.2
ENSG00000183160	-5.56427	-3.02296	0.00263982	0.0392384	TMEM119
ENSG00000257221	-5.56427	-2.99152	0.00263982	0.0392384	AC007569.1
ENSG00000226792	-5.56427	-3.02589	0.00263982	0.0392384	C13orf42
ENSG00000281183	-5.56427	-2.99152	0.00263982	0.0392384	NPTN-IT1
ENSG00000159289	-5.56427	-2.99152	0.00263982	0.0392384	GOLGA6A
ENSG00000262152	-5.56427	-2.99152	0.00263982	0.0392384	LINC00514
ENSG00000275056	-5.56427	-2.99927	0.00263982	0.0392384	AC020663.3
ENSG00000260247	-5.56427	-2.99152	0.00263982	0.0392384	SUB1P4
ENSG00000260177	-5.56427	-2.99152	0.00263982	0.0392384	AC126696.1
ENSG00000197291	-5.56427	-2.99617	0.00263982	0.0392384	RAMP2-AS1
ENSG00000267405	-5.56427	-2.99152	0.00263982	0.0392384	AC005180.1
ENSG00000279713	-5.56427	-3.00081	0.00263982	0.0392384	AC080038.3
ENSG00000266541	-5.56427	-3.02603	0.00263982	0.0392384	AP001381.1
ENSG00000205611	-5.56427	-2.99152	0.00263982	0.0392384	LINC01597
ENSG00000260536	-5.56427	-3.02589	0.00263982	0.0392384	AL035071.2
ENSG00000269635	-5.56427	-3.02589	0.00263982	0.0392384	AC004257.1
ENSG00000266559	-5.56427	-2.99152	0.00263982	0.0392384	MIR4530
ENSG00000278917	-5.56427	-2.99772	0.00263982	0.0392384	AC006213.6
ENSG00000081041	-5.49956	2.35105	2.74755e-13	3.03105e-10	CXCL2
ENSG00000267938	-5.49678	-0.734782	8.32956e-07	7.5545e-05	EIF1P6
ENSG00000163739	-5.47551	4.08455	3.55257e-15	7.69829e-12	CXCL1
ENSG00000178301	-5.47264	-0.763087	1.184e-06	0.000101325	AQP11
ENSG00000274678	-5.40945	1.51454	2.63673e-12	2.10505e-09	AC106886.3
ENSG00000237357	-5.37181	-0.845738	3.12194e-07	3.39591e-05	BX088651.4
ENSG00000174792	-5.37181	-0.839082	3.12194e-07	3.39591e-05	ODAPH
ENSG00000217275	-5.37181	-0.882251	2.45783e-06	0.000182923	AL031777.1
ENSG00000188993	-5.34547	-0.846392	3.12194e-07	3.39591e-05	LRRC66
ENSG00000143199	-5.31863	-0.875921	3.7741e-07	3.98944e-05	ADCY10
ENSG00000227959	-5.31863	-0.811189	1.41628e-06	0.000115501	AL451042.2
ENSG00000136881	-5.30477	-0.0840641	7.63589e-09	1.75495e-06	BAAT
ENSG00000267898	-5.19735	1.33468	4.06612e-12	2.97243e-09	AC026803.2
ENSG00000251201	-5.1764	-1.03956	6.47444e-06	0.000396005	TMED7-TICAM2
ENSG00000232630	-5.14619	-1.00782	1.01428e-06	9.02367e-05	PRPS1P2
ENSG00000260101	-5.14619	-1.05818	1.53686e-06	0.000124002	AC008074.2
ENSG00000163273	-5.14423	0.328491	1.42171e-09	4.37879e-07	NPPC
ENSG00000204103	-5.12774	1.47784	3.6789e-12	2.75577e-09	MAFB
ENSG00000103375	-5.11534	-1.10988	1.90061e-06	0.000150352	AQP8
ENSG00000185607	-5.11534	-1.06879	7.92209e-06	0.000460943	ACTBP7
ENSG00000080573	-5.09217	0.980083	8.63232e-11	4.02897e-08	COL5A3
ENSG00000273599	-5.06021	2.86146	1.88485e-13	2.19929e-10	AL731571.1
ENSG00000235821	-5.05158	-1.16806	2.9353e-06	0.00021027	IFITM4P
ENSG00000189001	-5.04918	2.05825	1.55864e-11	9.45704e-09	SBSN
ENSG00000153495	-5.03484	0.193124	4.35889e-09	1.08838e-06	TEX29
ENSG00000214093	-5.02216	0.183734	4.84817e-09	1.19094e-06	AL096701.1
ENSG00000212724	-5.01038	5.20423	7.36074e-15	1.44069e-11	KRTAP2-3
ENSG00000244482	-4.98486	-1.21619	3.66639e-06	0.000254529	LILRA6
ENSG00000182578	-4.98383	-0.377315	7.61092e-08	1.09171e-05	CSF1R
ENSG00000154040	-4.98383	-0.334996	2.41596e-07	2.80283e-05	CABYR
ENSG00000134594	-4.98343	0.141114	6.70347e-09	1.55836e-06	RAB33A
ENSG00000205683	-4.97902	2.01147	1.23196e-11	7.86832e-09	DPF3
ENSG00000223638	-4.94363	0.177227	1.96586e-08	3.81082e-06	RFPL4A
ENSG00000174898	-4.91492	-1.21291	1.82882e-05	0.000896314	CATSPERD
ENSG00000189238	-4.9061	-0.391917	7.61092e-08	1.09171e-05	LINC00943
ENSG00000224321	-4.90518	2.7298	6.25794e-13	5.93282e-10	RPL12P14
ENSG00000172232	-4.8888	0.100561	9.33923e-09	2.06809e-06	AZU1
ENSG00000229222	-4.84492	-0.501225	1.88978e-07	2.30245e-05	KRT18P4
ENSG00000236814	-4.8414	-1.30749	3.54099e-05	0.00151196	AC046176.1
ENSG00000257335	-4.83849	0.764015	5.31297e-10	1.87421e-07	MGAM
ENSG00000107742	-4.83594	0.406322	2.99855e-09	7.8403e-07	SPOCK2
ENSG00000241458	-4.82394	-0.457861	1.1906e-07	1.60451e-05	RPL7P19
ENSG00000235475	-4.80319	-1.37199	9.25563e-06	0.000519987	#N/A
ENSG00000277778	-4.78753	-0.0272233	2.35314e-08	4.504e-06	PGM5P2
ENSG00000186594	-4.77076	3.86918	1.67068e-12	1.37933e-09	MIR22HG
ENSG00000243886	-4.7236	-1.45328	1.50563e-05	0.00077682	AC117440.1
ENSG00000164100	-4.6912	-0.661534	2.78927e-06	0.000204642	NDST3
ENSG00000282034	-4.68463	1.04198	1.72931e-10	7.04202e-08	AC106886.5
ENSG00000163993	-4.68286	1.41858	2.16989e-09	6.1435e-07	S100P
ENSG00000265735	-4.68209	-1.52869	2.49155e-05	0.00114787	RN7SL5P
ENSG00000177606	-4.63329	7.71188	3.3953e-13	3.55189e-10	JUN
ENSG00000188039	-4.60148	1.33154	9.73071e-11	4.37341e-08	NWD1
ENSG00000105278	-4.59544	-0.171095	7.18987e-08	1.04615e-05	ZFR2
ENSG00000260179	-4.59531	-1.57683	3.22699e-05	0.00139457	AL162741.1
ENSG00000102387	-4.57821	-0.235737	1.21663e-07	1.62597e-05	TAF7L
ENSG00000213030	-4.54988	-1.59603	3.22699e-05	0.00139457	CGB8
ENSG00000122641	-4.545	-0.740079	9.92012e-07	8.87763e-05	INHBA
ENSG00000043039	-4.545	-0.740486	9.92012e-07	8.87763e-05	BARX2
ENSG00000270228	-4.545	-0.705608	7.00881e-07	6.66551e-05	AC079880.1
ENSG00000148677	-4.545	-0.763134	5.51983e-06	0.000341751	ANKRD1
ENSG00000267736	-4.51913	-0.75817	4.63975e-06	0.000303686	HMGB2P1
ENSG00000231194	-4.50904	1.48942	1.36513e-10	5.71234e-08	FARP1-AS1
ENSG00000213394	-4.50297	-1.71895	9.53831e-05	0.00324951	RPSAP46
ENSG00000281189	-4.50297	-1.74522	9.53831e-05	0.00324951	GHET1
ENSG00000183722	-4.4855	0.430357	7.26388e-08	1.05188e-05	LHFPL6
ENSG00000273199	-4.47261	0.0984522	3.76371e-08	6.34342e-06	AP000692.2
ENSG00000066336	-4.47031	-0.29058	1.82892e-07	2.24635e-05	SPI1
ENSG00000182586	-4.45151	-0.277138	6.22463e-07	6.08818e-05	LINC00334
ENSG00000225655	-4.45151	-0.335822	2.78248e-07	3.12065e-05	BX255923.1
ENSG00000010282	-4.42922	0.0445675	5.26771e-08	8.17438e-06	HHATL
ENSG00000271978	-4.42922	0.0541011	5.26771e-08	8.17438e-06	AL359643.2
ENSG00000236761	-4.40432	-1.73033	0.000313925	0.00829229	CTAGE9
ENSG00000113742	-4.38367	3.87927	1.39432e-11	8.63267e-09	CPEB4
ENSG00000271643	-4.36646	0.257934	3.6334e-08	6.26297e-06	AC112220.2
ENSG00000182866	-4.35234	-1.76231	9.53831e-05	0.00324951	LCK
ENSG00000261286	-4.35234	-1.76706	9.53831e-05	0.00324951	ATP2C2-AS1
ENSG00000267056	-4.35234	-1.76817	9.53831e-05	0.00324951	AC005336.1
ENSG00000259630	-4.35234	-1.79625	0.00012673	0.00401321	AC104046.1
ENSG00000198798	-4.34142	0.219989	4.92639e-08	7.70384e-06	MAGEB3
ENSG00000261456	-4.32372	-0.976454	1.98067e-05	0.000962189	TUBB8
ENSG00000262003	-4.3197	1.96685	6.7501e-11	3.32978e-08	AC087392.1
ENSG00000196361	-4.30812	0.750646	3.02983e-08	5.43287e-06	ELAVL3
ENSG00000224271	-4.29351	-1.00271	2.39996e-05	0.00111158	AL117329.1
ENSG00000105499	-4.27139	3.58821	9.49716e-11	4.33263e-08	PLA2G4C
ENSG00000279696	-4.26849	1.15202	1.10672e-08	2.38121e-06	AP001273.1
ENSG00000023445	-4.25191	5.14016	1.7631e-11	1.05917e-08	BIRC3
ENSG00000182676	-4.24872	-0.520269	4.02968e-06	0.000268978	PPP1R27
ENSG00000234042	-4.2424	-1.95835	0.000307811	0.0081521	AL591438.2
ENSG00000230508	-4.2424	-1.97747	0.000307811	0.0081521	RPL19P21
ENSG00000264940	-4.2424	-1.99214	0.000418933	0.0101875	SNORD3C
ENSG00000267279	-4.22964	2.41159	8.79153e-10	2.89906e-07	AC090409.1
ENSG00000171786	-4.21053	0.437508	8.6806e-09	1.95797e-06	NHLH1
ENSG00000124103	-4.19443	0.801028	8.85754e-09	1.99049e-06	FAM209A
ENSG00000198932	-4.19024	-0.210318	3.66697e-07	3.89033e-05	GPRASP1
ENSG00000263033	-4.18134	0.0775594	1.42817e-07	1.85159e-05	AC007220.1
ENSG00000257894	-4.1811	0.56852	2.37686e-08	4.52088e-06	AC027288.3
ENSG00000105697	-4.17653	0.753362	1.37138e-08	2.86927e-06	HAMP
ENSG00000161270	-4.16332	0.327697	1.66231e-07	2.08389e-05	NPHS1
ENSG00000226979	-4.15964	2.07196	4.01178e-10	1.4489e-07	LTA
ENSG00000230337	-4.13553	-0.644482	2.36331e-06	0.000176594	EXOSC10-AS1
ENSG00000099860	-4.13513	7.94697	3.40537e-11	1.84951e-08	GADD45B
ENSG00000234477	-4.13218	-1.13554	1.4769e-05	0.000765249	AC004231.1
ENSG00000228857	-4.1234	-1.99768	0.000307811	0.0081521	AC104653.1
ENSG00000237709	-4.1234	-1.98949	0.000307811	0.0081521	EEF1A1P28
ENSG00000198829	-4.11178	-0.687018	1.22912e-05	0.000650757	SUCNR1
ENSG00000100314	-4.10206	0.250372	1.21018e-07	1.62451e-05	CABP7
ENSG00000255303	-4.09763	-1.15746	1.4769e-05	0.000765249	OR5BA1P
ENSG00000134363	-4.09699	0.445095	2.64798e-08	4.85397e-06	FST
ENSG00000238120	-4.07935	1.63463	1.21323e-09	3.85724e-07	LINC01589
ENSG00000134954	-4.07268	5.0848	9.43245e-11	4.33263e-08	ETS1
ENSG00000158683	-4.06354	-0.35572	1.24109e-06	0.000105319	PKD1L1
ENSG00000270604	-4.06223	-1.26911	3.54099e-05	0.00151196	HCG17
ENSG00000164744	-4.06174	4.23733	4.76281e-11	2.44901e-08	SUN3
ENSG00000214362	-4.06	-2.15899	0.000791751	0.0161967	RPS3AP36
ENSG00000162733	-4.05326	1.43117	3.68865e-08	6.33242e-06	DDR2
ENSG00000162944	-4.02594	-1.27459	3.54099e-05	0.00151196	RFTN2
ENSG00000280213	-4.0181	1.8189	1.35255e-09	4.18704e-07	UCKL1-AS1
ENSG00000197208	-4.01715	-0.0132599	8.3154e-07	7.55294e-05	SLC22A4
ENSG00000125740	-4.00401	4.9855	1.06545e-10	4.6845e-08	FOSB
ENSG00000281903	-3.99368	-2.11839	0.000573952	0.0127937	LINC02246
ENSG00000151655	-3.99368	-2.18546	0.000791751	0.0161967	ITIH2
ENSG00000125966	-3.99368	-2.13836	0.000573952	0.0127937	MMP24
ENSG00000213943	-3.9913	1.03517	1.1136e-07	1.51837e-05	KRT18P17
ENSG00000226499	-3.98872	-1.31182	4.44368e-05	0.00178203	AL136380.1
ENSG00000225975	-3.98682	-0.775267	5.51983e-06	0.000341751	LINC01534
ENSG00000237977	-3.98581	-0.393118	1.43055e-06	0.000116508	EIF4HP2
ENSG00000117226	-3.98519	-0.119789	6.48821e-07	6.19956e-05	GBP3
ENSG00000152689	-3.97112	0.172877	2.01523e-07	2.37888e-05	RASGRP3
ENSG00000270022	-3.96893	-0.0572489	4.00303e-07	4.11668e-05	Z93241.1
ENSG00000115963	-3.96449	5.5455	1.35378e-10	5.71234e-08	RND3
ENSG00000162772	-3.95951	7.65528	1.07613e-10	4.69742e-08	ATF3
ENSG00000039987	-3.95051	-1.33392	4.44368e-05	0.00178203	BEST2
ENSG00000253047	-3.95051	-1.39934	7.07451e-05	0.00260623	AL356356.2
ENSG00000168679	-3.94344	0.180634	1.81717e-07	2.24099e-05	SLC16A4
ENSG00000068976	-3.93754	3.25646	2.35872e-10	9.00096e-08	PYGM
ENSG00000269825	-3.93363	-0.802805	6.58069e-06	0.000400314	AC022150.4
ENSG00000188383	-3.92417	-2.18243	0.000791751	0.0161967	GPAT2P2
ENSG00000243777	-3.92417	-2.20265	0.000791751	0.0161967	AP000942.1
ENSG00000227632	-3.92417	-2.21006	0.000791751	0.0161967	AC018804.1
ENSG00000213189	-3.92417	-2.2008	0.000791751	0.0161967	BTF3L4P2
ENSG00000262094	-3.92417	-2.27675	0.0015397	0.0272047	AC139099.1
ENSG00000105609	-3.91904	-0.198522	1.21502e-06	0.000103687	LILRB5
ENSG00000145040	-3.91904	-0.164325	9.4227e-07	8.49513e-05	UCN2
ENSG00000273483	-3.91835	0.715198	9.07277e-08	1.28021e-05	AL354760.1
ENSG00000087074	-3.91636	8.54392	1.78128e-10	7.15758e-08	PPP1R15A
ENSG00000279329	-3.91246	0.257513	2.96805e-07	3.29829e-05	AC020910.6
ENSG00000265185	-3.90629	-0.813845	7.86237e-06	0.000458701	SNORD3B-1
ENSG00000277224	-3.90629	-0.809651	2.42039e-05	0.00111934	HIST1H2BF
ENSG00000160255	-3.90461	1.17861	9.33348e-09	2.06809e-06	ITGB2
ENSG00000166257	-3.90365	-0.426636	1.90878e-06	0.000150801	SCN3B
ENSG00000090932	-3.88236	-0.475051	2.56188e-06	0.000189333	DLL3
ENSG00000228606	-3.85114	-2.27316	0.00110002	0.0209321	AL139011.1
ENSG00000213218	-3.85114	-2.26197	0.00110002	0.0209321	CSH2
ENSG00000229729	-3.85114	-2.28785	0.0015397	0.0272047	#N/A
ENSG00000228817	-3.84999	-0.994793	2.91543e-05	0.00131617	BACH1-IT2
ENSG00000168135	-3.83033	1.02702	3.57067e-07	3.81427e-05	KCNJ4
ENSG00000196110	-3.8294	-1.43745	8.97688e-05	0.00310001	ZNF699
ENSG00000280407	-3.82099	-0.890898	1.12984e-05	0.000618152	AC132872.4
ENSG00000109667	-3.81543	2.93646	2.1077e-09	6.08976e-07	SLC2A9
ENSG00000236824	-3.81234	9.03291	5.94753e-10	2.05038e-07	BCYRN1
ENSG00000170345	-3.79122	7.05846	5.86175e-10	2.03235e-07	FOS
ENSG00000183666	-3.77422	-2.34457	0.0015397	0.0272047	GUSBP1
ENSG00000260660	-3.77422	-2.34254	0.0015397	0.0272047	AC113208.3
ENSG00000243431	-3.77422	-2.33591	0.0015397	0.0272047	RPL5P30
ENSG00000220875	-3.77422	-2.34038	0.0015397	0.0272047	HIST1H3PS1
ENSG00000183638	-3.77422	-2.38347	0.00217176	0.0346767	RP1L1
ENSG00000226800	-3.77091	-0.556146	4.70143e-06	0.00030706	CACTIN-AS1
ENSG00000118503	-3.74949	3.79603	2.31602e-09	6.50575e-07	TNFAIP3
ENSG00000127364	-3.74755	-0.614286	7.5418e-06	0.000441272	TAS2R4
ENSG00000085514	-3.73707	1.6323	4.68719e-08	7.38689e-06	PILRA
ENSG00000137449	-3.73411	2.5483	2.66254e-09	7.11672e-07	CPEB2
ENSG00000139597	-3.71132	0.615409	3.1e-06	0.000220249	N4BP2L1
ENSG00000184492	-3.70804	1.29189	1.31436e-08	2.76905e-06	FOXD4L1
ENSG00000254876	-3.70019	-0.357373	3.52134e-06	0.000245866	SUGT1P4-STRA6LP
ENSG00000260367	-3.69881	-1.0352	2.91543e-05	0.00131617	AC109460.1
ENSG00000178403	-3.69719	-1.54566	0.000146263	0.00454641	NEUROG2
ENSG00000133800	-3.69719	-1.50112	0.000376605	0.00927752	LYVE1
ENSG00000259535	-3.69719	-1.54233	0.000603761	0.0133649	RPL21P12
ENSG00000243709	-3.69296	-2.41064	0.00217176	0.0346767	LEFTY1
ENSG00000229227	-3.69296	-2.46405	0.00308786	0.0446617	AL356056.1
ENSG00000273009	-3.69296	-2.40441	0.00217176	0.0346767	#N/A
ENSG00000227740	-3.68037	-0.412452	6.18179e-06	0.00038002	LINC02803
ENSG00000049249	-3.65581	0.41534	4.65057e-07	4.73445e-05	TNFRSF9
ENSG00000222041	-3.65202	6.42559	2.17693e-09	6.1435e-07	CYTOR
ENSG00000253309	-3.65029	-1.64008	0.000313925	0.00829229	SERPINE3
ENSG00000178502	-3.65013	-0.758934	2.03719e-05	0.000985696	KLHL11
ENSG00000111291	-3.64267	0.0628411	5.29599e-07	5.242e-05	GPRC5D
ENSG00000227992	-3.63946	1.16652	1.19264e-07	1.60451e-05	AC108463.1
ENSG00000254842	-3.63285	-0.184301	3.10824e-06	0.000220476	LINC02551
ENSG00000139626	-3.62472	-0.752911	2.03719e-05	0.000985696	ITGB7
ENSG00000232060	-3.60685	-2.50697	0.00308786	0.0446617	SLC4A1APP1
ENSG00000233594	-3.60685	-2.4982	0.00308786	0.0446617	BTF3P5
ENSG00000270799	-3.60685	-2.4885	0.00308786	0.0446617	AC013467.2
ENSG00000275854	-3.60685	-2.48606	0.00308786	0.0446617	AC084824.4
ENSG00000260602	-3.60685	-2.48606	0.00308786	0.0446617	HMGN2P40
ENSG00000279641	-3.6057	0.810258	2.12665e-06	0.000165488	AC120057.3
ENSG00000258469	-3.60522	1.78591	9.87489e-08	1.38694e-05	CHMP4BP1
ENSG00000259158	-3.6018	-1.60034	0.000768681	0.0158477	ADAM20P1
ENSG00000232450	-3.59987	-1.15942	6.52115e-05	0.0024319	AL133517.1
ENSG00000149201	-3.59884	-0.718251	0.000105839	0.00355384	CCDC81
ENSG00000198156	-3.58818	0.895479	6.25952e-07	6.08818e-05	NPIPB6
ENSG00000087303	-3.58208	0.0150308	7.4186e-07	6.97866e-05	NID2
ENSG00000146674	-3.58208	0.000545506	1.97176e-06	0.00015517	IGFBP3
ENSG00000070190	-3.57692	-0.444039	7.14031e-06	0.000421849	DAPP1
ENSG00000104450	-3.5736	5.06805	4.44685e-09	1.10579e-06	SPAG1
ENSG00000067798	-3.56942	2.90792	3.47588e-09	9.01278e-07	NAV3
ENSG00000184697	-3.55959	1.07094	1.17597e-06	0.000100922	CLDN6
ENSG00000176222	-3.5563	0.149074	7.41661e-07	6.97866e-05	ZNF404
ENSG00000184349	-3.54603	1.42694	4.05415e-08	6.77645e-06	EFNA5
ENSG00000213235	-3.5424	0.237166	8.12467e-07	7.39077e-05	EEF1A1P16
ENSG00000234155	-3.53673	0.842634	1.53039e-07	1.96313e-05	LINC02535
ENSG00000278867	-3.52992	-1.2196	9.92046e-05	0.00336458	AC090616.6
ENSG00000261438	-3.52992	-1.18176	0.000278675	0.0075116	AL157394.1
ENSG00000258454	-3.52495	-0.253935	2.04836e-06	0.00016016	AC016526.2
ENSG00000146592	-3.51883	-0.0483435	3.11294e-06	0.000220476	CREB5
ENSG00000136535	-3.51831	-0.848866	3.4377e-05	0.00147617	TBR1
ENSG00000274290	-3.51418	0.134565	1.8241e-06	0.000144676	HIST1H2BE
ENSG00000173762	-3.51418	0.135381	4.16451e-06	0.000276155	CD7
ENSG00000250461	-3.51109	-0.531314	1.28968e-05	0.000679263	AC122718.1
ENSG00000163376	-3.50346	1.5805	1.66728e-07	2.08582e-05	KBTBD8
ENSG00000015520	-3.49992	2.10858	2.48987e-08	4.6917e-06	NPC1L1
ENSG00000279382	-3.49965	-1.72885	0.000408565	0.00997974	AC018665.1
ENSG00000120500	-3.49965	-1.77525	0.00209942	0.033708	ARR3
ENSG00000226002	-3.49965	-1.74449	0.000534233	0.0120411	GTF2IP14
ENSG00000020577	-3.49111	4.86319	1.7425e-08	3.41124e-06	SAMD4A
ENSG00000104879	-3.48435	0.372797	7.28771e-07	6.89831e-05	CKM
ENSG00000120217	-3.47186	3.14051	3.72494e-08	6.33242e-06	CD274
ENSG00000203392	-3.45641	-1.27262	0.00015276	0.00470996	AC105020.1
ENSG00000268001	-3.44825	-0.322256	8.79389e-06	0.000505274	CARD8-AS1
ENSG00000228214	-3.44573	-1.78717	0.000534233	0.0120411	#N/A
ENSG00000254676	-3.44573	-1.76829	0.000534233	0.0120411	AP000873.4
ENSG00000262251	-3.4453	2.25746	1.36568e-07	1.77817e-05	#N/A
ENSG00000226824	-3.44211	-0.552574	1.28968e-05	0.000679263	AC006001.2
ENSG00000108947	-3.44112	0.0518338	1.49661e-05	0.000773482	EFNB3
ENSG00000269549	-3.43302	-0.966277	8.58555e-05	0.00298355	#N/A
ENSG00000204421	-3.42606	0.0373382	1.85039e-05	0.000905424	LY6G6C
ENSG00000118515	-3.426	3.79983	4.42903e-08	7.25907e-06	SGK1
ENSG00000186364	-3.42442	2.04405	4.86294e-07	4.94235e-05	NUDT17
ENSG00000145861	-3.41856	1.12123	9.99647e-08	1.39755e-05	C1QTNF2
ENSG00000137463	-3.41848	0.235543	8.25278e-06	0.000476439	MGARP
ENSG00000267416	-3.41836	-0.61392	2.3878e-05	0.00110934	AC025048.4
ENSG00000237399	-3.41836	-0.58148	0.00012185	0.00388973	PITRM1-AS1
ENSG00000179148	-3.41773	4.11861	1.47233e-08	3.02825e-06	ALOXE3
ENSG00000265452	-3.40731	0.48338	6.06742e-07	5.96662e-05	MIR3682
ENSG00000047346	-3.40672	2.83362	2.44804e-08	4.64171e-06	FAM214A
ENSG00000180539	-3.40343	-0.894832	4.92435e-05	0.0019554	C9orf139
ENSG00000251485	-3.40343	-0.901403	4.92435e-05	0.0019554	AC068134.3
ENSG00000251259	-3.38972	-1.83261	0.000701932	0.0152651	AC004069.1
ENSG00000272078	-3.37895	-1.31711	0.000190463	0.00554262	AL139423.1
ENSG00000278705	-3.37895	-1.33775	0.000190463	0.00554262	HIST1H4B
ENSG00000180422	-3.37717	0.172973	3.06865e-06	0.000218533	LINC00304
ENSG00000226396	-3.37316	0.423233	1.11094e-06	9.58835e-05	AL031727.1
ENSG00000277149	-3.3712	3.01543	6.74859e-08	1.00115e-05	TYW1B
ENSG00000236833	-3.36725	-0.400826	1.52272e-05	0.00078497	AC024560.1
ENSG00000225439	-3.36725	-0.355441	6.07599e-05	0.00228273	BOLA3-AS1
ENSG00000059728	-3.36214	3.77271	2.19764e-08	4.21968e-06	MXD1
ENSG00000113070	-3.3581	5.78582	4.15594e-08	6.88966e-06	HBEGF
ENSG00000188613	-3.35706	1.90473	2.01211e-07	2.37888e-05	NANOS1
ENSG00000219665	-3.35234	3.31104	2.13173e-08	4.10612e-06	ZNF433-AS1
ENSG00000111837	-3.34627	-0.387751	1.32487e-05	0.000695383	MAK
ENSG00000120949	-3.33144	-1.94031	0.00123015	0.0224817	TNFRSF8
ENSG00000233558	-3.33144	-1.96982	0.00164127	0.028233	AL050331.1
ENSG00000179046	-3.32056	4.73866	2.47787e-08	4.68364e-06	TRIML2
ENSG00000188033	-3.32017	0.130258	4.16451e-06	0.000276155	ZNF490
ENSG00000215481	-3.31551	2.31279	1.87761e-07	2.29475e-05	BCRP3
ENSG00000085563	-3.31232	3.30155	4.29374e-07	4.3859e-05	ABCB1
ENSG00000129437	-3.29556	0.470241	2.95383e-06	0.000211348	KLK14
ENSG00000114019	-3.29232	6.73522	3.03551e-08	5.43287e-06	AMOTL2
ENSG00000249279	-3.2786	-0.98176	0.000567945	0.0126878	LINC02057
ENSG00000272367	-3.2786	-1.02326	0.000678832	0.0148212	#N/A
ENSG00000203684	-3.27469	1.10152	3.61356e-07	3.84654e-05	IBA57-DT
ENSG00000165359	-3.2735	3.02692	1.00251e-07	1.39833e-05	INTS6L
ENSG00000214544	-3.27071	-1.945	0.00123015	0.0224817	GTF2IRD2P1
ENSG00000234231	-3.26806	0.876693	7.62194e-07	7.15884e-05	AC093616.1
ENSG00000164136	-3.25925	2.29172	1.70935e-07	2.12531e-05	IL15
ENSG00000276863	-3.25915	-0.533262	1.50079e-05	0.000774982	AC124319.2
ENSG00000234917	-3.25435	-1.4214	0.000299029	0.00797262	AC098484.2
ENSG00000167767	-3.25401	4.14964	7.50494e-08	1.0842e-05	KRT80
ENSG00000170175	-3.25091	6.62968	5.81807e-08	8.75958e-06	CHRNB1
ENSG00000144655	-3.24605	6.52823	3.60693e-08	6.25287e-06	CSRNP1
ENSG00000099869	-3.24563	-1.07372	0.000152923	0.00470996	IGF2-AS
ENSG00000203709	-3.24563	-1.06156	0.000125845	0.00399144	MIR29B2CHG
ENSG00000205918	-3.24563	-1.06995	0.000152923	0.00470996	PDPK2P
ENSG00000175229	-3.24021	-0.804832	7.49303e-05	0.00273714	GAL3ST3
ENSG00000213949	-3.22893	0.186288	1.21485e-05	0.000645456	ITGA1
ENSG00000250934	-3.22624	0.560602	2.50717e-05	0.00115419	AC016924.1
ENSG00000113448	-3.21353	-0.569902	4.87272e-05	0.00194125	PDE4D
ENSG00000205105	-3.21287	-0.816124	8.88809e-05	0.00307987	COX17P1
ENSG00000188152	-3.21189	-1.12866	0.000186301	0.00544498	NUTM2G
ENSG00000279096	-3.21031	-1.5037	0.000475983	0.0113777	AL356289.2
ENSG00000278600	-3.21031	-1.48425	0.0015621	0.0275204	AC015871.4
ENSG00000260464	-3.20731	-2.06702	0.00296975	0.043294	AL049796.1
ENSG00000171777	-3.20731	-2.03672	0.00220165	0.0350157	RASGRP4
ENSG00000254639	-3.20731	-2.03646	0.00220165	0.0350157	AC116021.1
ENSG00000247982	-3.20071	0.161732	7.28728e-06	0.000428861	LINC00926
ENSG00000237298	-3.19894	-0.00221024	5.36368e-06	0.000333444	TTN-AS1
ENSG00000181016	-3.19753	2.90399	1.27207e-07	1.69081e-05	LSMEM1
ENSG00000277639	-3.18639	0.152119	8.05924e-06	0.000467043	AC007906.2
ENSG00000273340	-3.17886	-0.222114	1.18255e-05	0.00064375	MICE
ENSG00000258708	-3.17734	-1.12925	0.000186301	0.00544498	SLC25A21-AS1
ENSG00000111799	-3.17543	7.40713	1.038e-07	1.42699e-05	COL12A1
ENSG00000273203	-3.17462	1.22466	4.38975e-06	0.000289509	AC006946.2
ENSG00000229808	-3.17014	0.987741	2.53424e-06	0.000187747	AL391825.1
ENSG00000136918	-3.16488	-1.53642	0.00196435	0.0318597	WDR38
ENSG00000274471	-3.16488	-1.53866	0.000603761	0.0133649	AC242376.2
ENSG00000188163	-3.16273	0.225172	1.76546e-05	0.00086844	FAM166A
ENSG00000213714	-3.16273	0.249793	7.50407e-06	0.000439488	FAM209B
ENSG00000223668	-3.15657	-0.783193	6.32903e-05	0.00237632	EEF1A1P24
ENSG00000279191	-3.15499	0.384915	2.99437e-06	0.000213745	AC068491.4
ENSG00000198929	-3.15284	-0.347801	2.26319e-05	0.0010563	NOS1AP
ENSG00000245534	-3.14935	0.195173	6.59377e-06	0.000400314	RORA-AS1
ENSG00000019102	-3.14278	1.07847	7.19415e-07	6.82039e-05	VSIG2
ENSG00000110693	-3.12768	0.667381	2.12741e-06	0.000165488	SOX6
ENSG00000185022	-3.11638	6.98078	2.00066e-07	2.3709e-05	MAFF
ENSG00000174567	-3.11511	5.17101	1.34392e-07	1.7536e-05	GOLT1A
ENSG00000177738	-3.11282	2.76911	1.67842e-07	2.09114e-05	AC025171.1
ENSG00000170498	-3.10693	3.0714	3.56618e-07	3.81427e-05	KISS1
ENSG00000171989	-3.10566	-1.20405	0.000342209	0.00859211	LDHAL6B
ENSG00000188199	-3.09938	0.52492	6.78469e-06	0.000402012	NUTM2B
ENSG00000258857	-3.09799	-0.886074	0.000125798	0.00399144	AL359397.1
ENSG00000150457	-3.09338	5.26487	3.45717e-07	3.71263e-05	LATS2
ENSG00000166819	-3.06949	-1.64893	0.00126033	0.0229503	PLIN1
ENSG00000273026	-3.06843	-1.23161	0.000342209	0.00859211	AL358472.3
ENSG00000183604	-3.06733	-0.612569	0.000141443	0.00441917	SMG1P5
ENSG00000178917	-3.06642	0.0683909	0.000169505	0.00499745	ZNF852
ENSG00000185532	-3.06642	0.0308559	3.71658e-05	0.00157475	PRKG1
ENSG00000130649	-3.0377	0.717139	4.57202e-06	0.0002999	CYP2E1
ENSG00000280287	-3.0347	1.36898	4.26591e-06	0.00028257	AC131212.3
ENSG00000102098	-3.03372	2.94923	6.58097e-07	6.2783e-05	SCML2
ENSG00000180953	-3.03323	1.77214	1.56233e-06	0.000125889	AC015871.1
ENSG00000259306	-3.03022	-1.20047	0.00170746	0.028233	AC020891.2
ENSG00000278267	-3.03022	-1.2015	0.00170746	0.028233	MIR6859-1
ENSG00000165046	-3.01996	4.53882	3.54723e-07	3.80262e-05	LETM2
ENSG00000143632	-3.01862	0.745554	3.69588e-06	0.000256283	ACTA1
ENSG00000228393	-3.01511	-0.727495	5.35591e-05	0.00211569	LINC01004
ENSG00000279821	-3.01237	2.16654	1.32083e-06	0.000109569	AC145098.2
ENSG00000186481	-3.00899	0.720369	4.57202e-06	0.0002999	ANKRD20A5P
ENSG00000164082	-3.00539	-0.967305	0.000215093	0.00620874	GRM2
ENSG00000198939	-2.99097	-1.29733	0.000520365	0.0117635	ZFP2
ENSG00000162511	-2.99097	-1.31586	0.00064444	0.014151	LAPTM5
ENSG00000224786	-2.99097	-1.30915	0.00064444	0.014151	CETN4P
ENSG00000187837	-2.98049	5.82766	4.92376e-07	4.97268e-05	HIST1H1C
ENSG00000143257	-2.97316	-1.03498	0.000310866	0.00822582	NR1I3
ENSG00000271324	-2.97316	-1.03609	0.000374968	0.00924093	#N/A
ENSG00000057468	-2.97316	-1.03097	0.000374968	0.00924093	MSH4
ENSG00000138615	-2.96941	-0.0627377	1.89527e-05	0.000925145	CILP
ENSG00000121577	-2.96812	0.516267	7.35466e-06	0.00043157	POPDC2
ENSG00000270806	-2.96734	-1.72542	0.00162335	0.028233	C17orf50
ENSG00000225137	-2.96734	-1.69026	0.00162335	0.028233	DYNC1I2P1
ENSG00000172965	-2.96314	5.88438	4.07065e-07	4.17913e-05	MIR4435-2HG
ENSG00000260853	-2.96093	-0.751926	0.000798045	0.016287	AC109460.2
ENSG00000257732	-2.96076	2.43304	1.27288e-05	0.000671585	AC089983.1
ENSG00000135604	-2.96016	2.0479	4.28216e-06	0.000283337	STX11
ENSG00000048052	-2.95959	1.40092	4.77439e-06	0.000311156	HDAC9
ENSG00000251598	-2.95752	0.201669	1.21485e-05	0.000645456	AC093916.1
ENSG00000183696	-2.95459	6.66732	4.00034e-07	4.11668e-05	UPP1
ENSG00000124664	-2.9529	0.318396	8.38735e-05	0.00292641	SPDEF
ENSG00000185792	-2.94756	0.0782427	0.000289337	0.00777136	NLRP9
ENSG00000255150	-2.94522	-0.390563	7.92643e-05	0.0028578	EID3
ENSG00000107831	-2.94158	1.96257	2.18299e-06	0.000168778	FGF8
ENSG00000107147	-2.93988	-0.262699	7.9523e-05	0.0028578	KCNT1
ENSG00000240668	-2.93988	-0.207398	0.000369233	0.00913672	KRT8P36
ENSG00000250616	-2.93728	0.770844	5.0668e-06	0.000317537	AC012645.1
ENSG00000166278	-2.93666	0.400838	9.31255e-06	0.0005227	C2
ENSG00000272341	-2.93316	0.981133	8.44137e-05	0.00294269	AL137003.2
ENSG00000234805	-2.93161	0.541417	1.02315e-05	0.00056642	AC090505.1
ENSG00000111713	-2.92787	-0.545948	9.08201e-05	0.00312564	GYS2
ENSG00000283078	-2.92083	-0.212336	0.000369233	0.00913672	AL137077.2
ENSG00000231305	-2.91834	-0.0634634	0.000134564	0.00423039	AC112484.1
ENSG00000185950	-2.91281	5.64378	9.81388e-07	8.80854e-05	IRS2
ENSG00000185261	-2.90912	-1.39257	0.000997217	0.019741	KIAA0825
ENSG00000278000	-2.90603	1.82727	3.91768e-06	0.000262948	AC139100.2
ENSG00000179674	-2.90583	1.01468	3.17663e-06	0.000223858	ARL14
ENSG00000101670	-2.89958	2.24537	1.30565e-06	0.000109569	LIPG
ENSG00000178977	-2.88432	0.01551	0.000430642	0.0104267	LINC00324
ENSG00000271933	-2.87564	-0.82794	0.000105635	0.00354895	AL603756.1
ENSG00000260213	-2.87564	-0.856052	0.000283738	0.00763111	AC092718.2
ENSG00000138271	-2.87345	2.85837	2.46007e-06	0.000182923	GPR87
ENSG00000136153	-2.87056	3.38026	3.859e-06	0.000259296	LMO7
ENSG00000246203	-2.86806	-0.0235774	5.70287e-05	0.00220827	AL353807.3
ENSG00000173702	-2.85969	1.34661	7.59481e-06	0.000443945	MUC13
ENSG00000170442	-2.85292	-0.697012	0.000124205	0.00395392	KRT86
ENSG00000010818	-2.85127	4.98443	1.0664e-06	9.26986e-05	HIVEP2
ENSG00000219891	-2.8488	1.87942	8.60112e-06	0.000494666	ZSCAN12P1
ENSG00000162924	-2.84415	1.44623	3.32721e-06	0.000233926	REL
ENSG00000271754	-2.84204	-0.354127	0.000132408	0.00417343	AL355802.3
ENSG00000272375	-2.8365	-1.20012	0.00099151	0.0196601	AC026979.3
ENSG00000238178	-2.83551	1.86294	9.81876e-06	0.000545561	AC078993.1
ENSG00000116717	-2.83498	8.59765	1.3294e-06	0.000109569	GADD45A
ENSG00000143443	-2.82846	0.86717	3.3972e-05	0.00146292	C1orf56
ENSG00000162734	-2.8278	7.77439	1.58156e-06	0.000127269	PEA15
ENSG00000197140	-2.82598	2.28497	8.05455e-06	0.000467043	ADAM32
ENSG00000166920	-2.82234	-1.47848	0.0015621	0.0275204	C15orf48
ENSG00000139219	-2.82234	-1.43989	0.00124616	0.0227363	COL2A1
ENSG00000215018	-2.82234	-1.50974	0.00196435	0.0318597	COL28A1
ENSG00000230216	-2.82234	-1.50696	0.00196435	0.0318597	HSPB1P2
ENSG00000107249	-2.82199	2.02731	4.09941e-06	0.000272732	GLIS3
ENSG00000227479	-2.81584	-0.908274	0.0003999	0.0097957	AC124861.1
ENSG00000278771	-2.81394	2.78323	4.06972e-06	0.000271352	RN7SL3
ENSG00000225313	-2.81248	-0.478624	0.000591879	0.0131306	AL513327.1
ENSG00000126524	-2.80212	7.24511	2.1083e-06	0.000164423	SBDS
ENSG00000162188	-2.80136	0.349292	2.60766e-05	0.00119321	GNG3
ENSG00000254198	-2.8007	-0.655627	9.0339e-05	0.00311439	AC113191.1
ENSG00000188305	-2.8007	-0.696733	0.000260641	0.00707263	PEAK3
ENSG00000142552	-2.80021	-1.13969	0.000667211	0.0146043	RCN3
ENSG00000247679	-2.79707	1.79101	3.15861e-06	0.000223107	AC139795.2
ENSG00000110876	-2.79416	1.67943	5.798e-06	0.000357514	SELPLG
ENSG00000197847	-2.79007	1.49314	1.45399e-05	0.000756612	SLC22A20P
ENSG00000183891	-2.78995	3.24577	3.49919e-06	0.0002446	TTC32
ENSG00000147576	-2.7833	0.830955	2.05595e-05	0.000993192	ADHFE1
ENSG00000198576	-2.78283	6.50993	2.48895e-06	0.000184617	ARC
ENSG00000279233	-2.78091	0.280032	4.07677e-05	0.00169683	AC122688.3
ENSG00000140839	-2.78091	0.257619	4.89302e-05	0.00194678	CLEC18B
ENSG00000196639	-2.7762	4.44141	2.46544e-06	0.000183097	HRH1
ENSG00000120738	-2.77458	8.26222	1.73612e-06	0.000138059	EGR1
ENSG00000273058	-2.77458	1.4416	9.19663e-06	0.000517951	AL359921.2
ENSG00000272275	-2.77298	1.95719	4.65818e-06	0.000304564	AC092687.3
ENSG00000159208	-2.7726	-0.221443	0.000113624	0.00371568	CIART
ENSG00000105810	-2.76904	6.83678	1.98209e-06	0.000155686	CDK6
ENSG00000169330	-2.76471	1.51167	9.59579e-06	0.000535133	MINAR1
ENSG00000218336	-2.76368	1.2126	5.39336e-06	0.000334603	TENM3
ENSG00000160588	-2.76358	4.59799	3.04492e-06	0.000217098	MPZL3
ENSG00000196189	-2.76092	0.718446	6.89691e-05	0.0025532	SEMA4A
ENSG00000154165	-2.74885	-0.138216	0.000124349	0.00395432	GPR15
ENSG00000279443	-2.74634	2.7742	7.41467e-06	0.000434672	AL513497.1
ENSG00000163806	-2.74399	1.14482	2.53488e-05	0.00116518	SPDYA
ENSG00000278390	-2.74124	-0.615843	0.000191426	0.00556531	AL354696.2
ENSG00000155918	-2.73992	1.34653	0.000130407	0.00411464	RAET1L
ENSG00000258441	-2.73537	4.74581	4.36242e-06	0.000288019	LINC00641
ENSG00000270207	-2.73098	-0.151633	7.9491e-05	0.0028578	AC077690.1
ENSG00000269646	-2.73	-1.60995	0.00313656	0.0452152	AC010487.2
ENSG00000223722	-2.72886	2.41942	3.95282e-06	0.000264721	AC023157.1
ENSG00000152137	-2.72862	4.71941	3.44901e-06	0.00024165	HSPB8
ENSG00000258881	-2.72839	0.756378	0.000219444	0.00632231	AC007040.2
ENSG00000189350	-2.72501	0.224817	0.000170554	0.00502349	TOGARAM2
ENSG00000215241	-2.72478	-1.25136	0.00121318	0.0222318	LINC02449
ENSG00000234498	-2.72255	3.60043	9.49788e-06	0.000530648	RPL13AP20
ENSG00000270722	-2.72122	-1.0416	0.000975658	0.0194347	U1
ENSG00000105369	-2.72009	0.547862	2.70762e-05	0.00123522	CD79A
ENSG00000143512	-2.71515	-0.456461	0.000136842	0.00429534	HHIPL2
ENSG00000214199	-2.71135	1.61937	9.20233e-06	0.000517951	EEF1A1P12
ENSG00000179388	-2.70855	0.617595	6.95371e-05	0.00256953	EGR3
ENSG00000111729	-2.70676	1.14146	9.14137e-06	0.000515476	CLEC4A
ENSG00000248121	-2.69458	-0.0783436	0.000796913	0.0162854	SMURF2P1
ENSG00000028277	-2.69422	2.75999	3.78485e-06	0.000259061	POU2F2
ENSG00000031003	-2.692	3.52279	1.69771e-06	0.000136255	FAM13B
ENSG00000224647	-2.68825	-1.0219	0.000374968	0.00924093	AC026954.1
ENSG00000230736	-2.68825	-1.0217	0.000374968	0.00924093	AL021937.1
ENSG00000256745	-2.68825	-1.01931	0.000812996	0.0165588	AP002784.2
ENSG00000166825	-2.68706	0.612781	6.95371e-05	0.00256953	ANPEP
ENSG00000264608	-2.68621	0.528564	3.41848e-05	0.00146895	AC005726.3
ENSG00000130783	-2.68299	1.89245	4.84765e-06	0.000314916	CCDC62
ENSG00000133121	-2.68212	1.87105	2.74591e-05	0.00125081	STARD13
ENSG00000197815	-2.68151	-1.54607	0.00196435	0.0318597	AC122129.1
ENSG00000227201	-2.67976	0.830177	1.3285e-05	0.000696689	CNN2P1
ENSG00000234084	-2.67312	0.420823	4.25578e-05	0.00171678	AL049552.1
ENSG00000133878	-2.66731	1.30251	7.92359e-06	0.000460943	DUSP26
ENSG00000266209	-2.66352	1.82201	1.4219e-05	0.000741822	#N/A
ENSG00000277310	-2.66122	-0.81447	0.00109213	0.0209321	AC090246.1
ENSG00000166147	-2.66081	0.775686	6.86867e-05	0.0025443	FBN1
ENSG00000280355	-2.65475	1.14091	1.89295e-05	0.000924754	AL132656.4
ENSG00000279392	-2.65451	-0.980468	0.00134415	0.0242511	AL158801.5
ENSG00000184368	-2.64725	-0.522297	0.000445066	0.0107311	MAP7D2
ENSG00000099985	-2.64725	-0.391586	0.00108436	0.0209321	OSM
ENSG00000188996	-2.64512	0.326743	0.000137662	0.00431661	HUS1B
ENSG00000172361	-2.64148	3.29442	7.31772e-06	0.000430235	CFAP53
ENSG00000226763	-2.64041	-0.659412	0.000504023	0.0114738	SRRM5
ENSG00000242779	-2.64012	1.4629	4.24202e-05	0.00171247	ZNF702P
ENSG00000137502	-2.63521	2.35456	1.10291e-05	0.000606725	RAB30
ENSG00000111348	-2.63497	1.93148	4.58629e-05	0.00183679	ARHGDIB
ENSG00000097096	-2.63441	1.19678	6.00602e-05	0.00225924	SYDE2
ENSG00000273365	-2.63134	-1.58214	0.00247815	0.0388031	AL451074.5
ENSG00000161664	-2.63134	-1.64225	0.00313656	0.0452152	ASB16
ENSG00000213801	-2.63134	-1.63134	0.00313656	0.0452152	ZNF321P
ENSG00000131791	-2.62885	4.7081	9.04037e-06	0.00051073	PRKAB2
ENSG00000170396	-2.62786	1.40582	1.25631e-05	0.000663995	ZNF804A
ENSG00000241170	-2.62475	0.689202	0.000369688	0.00914052	AP001992.1
ENSG00000183508	-2.62282	3.06089	9.84336e-06	0.000546428	TENT5C
ENSG00000276075	-2.61996	-1.02132	0.00190516	0.0310407	AC027682.6
ENSG00000260369	-2.61406	-0.751311	0.000418985	0.0101875	AC120024.1
ENSG00000101306	-2.6126	1.66617	0.00010808	0.00362508	MYLK2
ENSG00000164406	-2.61079	0.385424	5.95203e-05	0.00224032	LEAP2
ENSG00000203706	-2.61079	0.402286	0.000296489	0.00793795	SERTAD4-AS1
ENSG00000224660	-2.60952	2.18432	3.06798e-05	0.0013313	SH3BP5-AS1
ENSG00000229348	-2.60628	0.12419	0.000216093	0.00623463	HYI-AS1
ENSG00000234199	-2.60367	-1.36827	0.00225652	0.0357853	LINC01191
ENSG00000158246	-2.60208	5.57018	1.125e-05	0.000616062	TENT5B
ENSG00000224903	-2.60142	-0.901926	0.00047611	0.0113777	AC005534.1
ENSG00000138347	-2.60142	-0.824611	0.000579633	0.0129061	MYPN
ENSG00000263826	-2.60142	-0.773813	0.00320108	0.0460796	AC112907.3
ENSG00000272434	-2.60015	-0.538187	0.000241034	0.00660258	AC137630.3
ENSG00000076356	-2.59899	1.75311	3.73321e-05	0.00157963	PLXNA2
ENSG00000276148	-2.59721	0.921204	3.46017e-05	0.00148477	AC084824.5
ENSG00000260118	-2.59132	0.33501	0.000202233	0.00585983	AL157700.1
ENSG00000274840	-2.58994	-0.121182	0.000124349	0.00395432	AC132807.2
ENSG00000130449	-2.58981	3.81241	1.76634e-05	0.00086844	ZSWIM6
ENSG00000165118	-2.58885	-0.3699	0.000307336	0.0081521	C9orf64
ENSG00000079482	-2.58576	1.67137	0.000155768	0.00479514	OPHN1
ENSG00000172602	-2.58481	2.55528	1.54328e-05	0.000792874	RND1
ENSG00000267082	-2.58456	-1.10569	0.00141389	0.0252838	AC011472.1
ENSG00000119715	-2.5834	1.32996	0.000115965	0.00372482	ESRRB
ENSG00000121417	-2.58301	3.27758	1.00647e-05	0.000558204	ZNF211
ENSG00000183018	-2.58126	3.97059	1.06574e-05	0.000587852	SPNS2
ENSG00000267568	-2.57937	-1.63784	0.00313656	0.0452152	AC016168.2
ENSG00000175564	-2.57488	1.62848	4.0475e-05	0.00169484	UCP3
ENSG00000278341	-2.57	0.582063	5.57248e-05	0.00219409	AC138028.6
ENSG00000102385	-2.56717	0.463445	0.000301889	0.00803029	DRP2
ENSG00000213144	-2.56691	-0.395711	0.00122771	0.0224595	AC084880.1
ENSG00000278384	-2.56691	-0.389441	0.000671735	0.0146821	AL354822.1
ENSG00000173575	-2.56284	8.0173	1.2378e-05	0.000654781	CHD2
ENSG00000173530	-2.55539	7.39661	1.32461e-05	0.000695383	TNFRSF10D
ENSG00000255983	-2.55262	0.929622	0.000237979	0.00653661	AC007848.1
ENSG00000003987	-2.55145	-0.549164	0.00300512	0.0437047	MTMR7
ENSG00000188782	-2.55145	-0.499484	0.00231602	0.036614	CATSPER4
ENSG00000225648	-2.54849	5.10553	1.56155e-05	0.000799551	SBDSP1
ENSG00000181026	-2.541	7.57392	1.22062e-05	0.000646821	AEN
ENSG00000258365	-2.53897	0.482727	7.00898e-05	0.0025868	AC073655.2
ENSG00000269821	-2.53693	2.06849	8.81408e-05	0.00305597	KCNQ1OT1
ENSG00000164949	-2.53498	4.95865	1.97022e-05	0.000958646	GEM
ENSG00000079335	-2.53165	2.7848	2.54702e-05	0.00116988	CDC14A
ENSG00000237575	-2.52711	1.31951	7.51899e-05	0.00274497	PYY2
ENSG00000196878	-2.52448	7.98292	1.11623e-05	0.000612362	LAMB3
ENSG00000167359	-2.522	-0.445275	0.00051805	0.0117199	OR51I1
ENSG00000154479	-2.522	-0.499971	0.000775172	0.0159652	CCDC173
ENSG00000225173	-2.51696	1.85952	9.72217e-05	0.00330472	AL662890.1
ENSG00000156232	-2.51234	4.91803	2.11668e-05	0.0010209	WHAMM
ENSG00000108551	-2.51154	0.594174	0.000122748	0.00391568	RASD1
ENSG00000276256	-2.50983	3.81852	1.33728e-05	0.000700563	AC011043.1
ENSG00000034152	-2.50914	8.52979	1.62352e-05	0.000810191	MAP2K3
ENSG00000164675	-2.50681	-0.908893	0.000955142	0.0190876	IQUB
ENSG00000160886	-2.5066	0.844156	6.42159e-05	0.00240364	LY6K
ENSG00000261490	-2.50611	3.14813	1.52779e-05	0.000785579	AC005674.2
ENSG00000197061	-2.50485	1.71739	2.529e-05	0.00116336	HIST1H4C
ENSG00000219186	-2.50358	-0.785827	0.000492399	0.0114738	FTH1P19
ENSG00000263002	-2.50299	1.13211	0.000478342	0.0114144	ZNF234
ENSG00000198862	-2.50009	2.28933	9.5135e-05	0.00324951	LTN1
ENSG00000049759	-2.4994	6.81121	1.42516e-05	0.000742323	NEDD4L
ENSG00000182264	-2.49902	-0.457079	0.00051805	0.0117199	IZUMO1
ENSG00000111700	-2.49736	2.50867	4.88007e-05	0.0019429	SLCO1B3
ENSG00000006652	-2.49611	5.7353	1.83964e-05	0.00090089	IFRD1
ENSG00000077522	-2.49593	-0.0803136	0.00117147	0.0215766	ACTN2
ENSG00000245954	-2.49371	-0.00119777	0.00017771	0.00521905	LINC02273
ENSG00000267858	-2.49352	2.86826	3.83044e-05	0.00161509	MZF1-AS1
ENSG00000274238	-2.49134	0.311286	0.000569451	0.0127027	AC097478.1
ENSG00000258900	-2.48834	2.53346	5.7676e-05	0.00220827	HNRNPCP1
ENSG00000109758	-2.4872	0.92574	9.59595e-05	0.00326731	HGFAC
ENSG00000276007	-2.48695	0.985724	0.000216563	0.00624524	AC079414.3
ENSG00000272368	-2.48456	1.63518	9.19035e-05	0.00315665	AC074032.1
ENSG00000177432	-2.47513	2.02349	2.28934e-05	0.00106769	NAP1L5
ENSG00000101844	-2.47433	4.1793	1.93871e-05	0.000944828	ATG4A
ENSG00000231551	-2.47384	-0.957654	0.00134415	0.0242511	AC245100.4
ENSG00000267476	-2.47192	1.27535	3.33653e-05	0.00143986	AC104365.1
ENSG00000236751	-2.47116	1.16611	4.4002e-05	0.00176927	LINC01186
ENSG00000143367	-2.47088	5.4779	1.26875e-05	0.000669988	TUFT1
ENSG00000145390	-2.4637	4.58059	2.05025e-05	0.000991226	USP53
ENSG00000275202	-2.45987	-0.0389218	0.000647429	0.0141969	AL161421.1
ENSG00000117616	-2.45873	6.10482	3.38085e-05	0.00145691	RSRP1
ENSG00000265800	-2.45654	-0.22084	0.000250655	0.006823	AC022211.3
ENSG00000129474	-2.45621	6.82859	2.59958e-05	0.00119041	AJUBA
ENSG00000223802	-2.45383	0.459535	8.89395e-05	0.00308014	CERS1
ENSG00000151466	-2.45196	4.52324	2.59415e-05	0.00118882	SCLT1
ENSG00000179454	-2.4511	3.32553	4.33046e-05	0.00174238	KLHL28
ENSG00000152133	-2.44953	4.27785	5.42961e-05	0.00214247	GPATCH11
ENSG00000274735	-2.44883	-0.660069	0.00105458	0.0207547	#N/A
ENSG00000204428	-2.44592	1.82416	4.07615e-05	0.00169683	LY6G5C
ENSG00000258643	-2.44513	0.0799392	0.000169505	0.00499745	BCL2L2-PABPN1
ENSG00000144045	-2.445	-0.7921	0.00109213	0.0209321	DQX1
ENSG00000255198	-2.44266	5.37647	2.77188e-05	0.0012598	SNHG9
ENSG00000268439	-2.44264	-0.0445684	0.00117147	0.0215766	#N/A
ENSG00000196083	-2.44022	1.9569	0.000108209	0.00362538	IL1RAP
ENSG00000168952	-2.44009	-1.02233	0.00190516	0.0310407	STXBP6
ENSG00000162086	-2.43942	3.70524	1.86151e-05	0.00091013	ZNF75A
ENSG00000008405	-2.43778	5.32484	2.66696e-05	0.00121851	CRY1
ENSG00000170122	-2.4366	1.96805	4.20047e-05	0.00169683	FOXD4
ENSG00000131018	-2.43625	2.62937	7.92711e-05	0.0028578	SYNE1
ENSG00000198881	-2.43359	-1.26857	0.00148815	0.0264747	ASB12
ENSG00000266964	-2.43359	-1.21992	0.00250622	0.039192	FXYD1
ENSG00000276851	-2.42887	0.0434127	0.000229138	0.00652113	AC002401.4
ENSG00000085433	-2.42879	4.08604	3.77246e-05	0.00159234	WDR47
ENSG00000076641	-2.42594	2.10182	5.09317e-05	0.00201715	PAG1
ENSG00000121966	-2.42359	1.60243	0.000313792	0.00829229	CXCR4
ENSG00000072415	-2.42159	5.45748	2.26003e-05	0.00105564	MPP5
ENSG00000174799	-2.41841	3.22436	6.68233e-05	0.00248134	CEP135
ENSG00000240291	-2.41715	2.10128	0.000264197	0.00715312	AL450384.2
ENSG00000171790	-2.41479	-0.785723	0.000932882	0.0186684	SLFNL1
ENSG00000229093	-2.41479	-0.862058	0.00176844	0.0290472	OR51AB1P
ENSG00000174010	-2.41227	3.91763	3.57132e-05	0.0015217	KLHL15
ENSG00000148346	-2.41008	2.73866	2.34102e-05	0.00108927	LCN2
ENSG00000196428	-2.40919	4.67454	3.69083e-05	0.00156493	TSC22D2
ENSG00000272343	-2.40554	-1.09973	0.00141389	0.0252838	AC107952.2
ENSG00000114771	-2.40322	1.90103	0.000143877	0.00448831	AADAC
ENSG00000175265	-2.40317	4.70917	2.55067e-05	0.00117067	GOLGA8A
ENSG00000179361	-2.40245	3.89671	6.94495e-05	0.00256942	ARID3B
ENSG00000159882	-2.39559	1.8792	4.85704e-05	0.00193755	ZNF230
ENSG00000131471	-2.39544	3.80905	2.17299e-05	0.00104087	AOC3
ENSG00000132958	-2.39465	-0.748958	0.00165201	0.028233	TPTE2
ENSG00000180210	-2.39324	-1.23812	0.00121318	0.0222318	F2
ENSG00000180611	-2.38999	3.21335	7.87993e-05	0.0028578	MB21D2
ENSG00000136542	-2.38831	4.36016	3.76355e-05	0.00159021	GALNT5
ENSG00000196369	-2.3871	1.48768	0.000121868	0.00388973	SRGAP2B
ENSG00000182798	-2.38354	0.780404	0.000100529	0.0034009	MAGEB17
ENSG00000197467	-2.37341	5.77534	5.82675e-05	0.00220827	COL13A1
ENSG00000112183	-2.37021	3.86964	3.34042e-05	0.00144051	RBM24
ENSG00000134539	-2.36678	-0.732814	0.00165201	0.028233	KLRD1
ENSG00000169826	-2.36485	4.18775	6.03186e-05	0.00226755	CSGALNACT2
ENSG00000272077	-2.3637	2.16307	0.000165131	0.00487557	AC124045.1
ENSG00000135709	-2.36364	5.15404	3.88845e-05	0.00163501	KIAA0513
ENSG00000131480	-2.36263	3.76487	6.62465e-05	0.00246293	AOC2
ENSG00000124613	-2.36196	0.00870361	0.000281051	0.00756893	ZNF391
ENSG00000162782	-2.35282	-0.555892	0.00101981	0.0201423	TDRD5
ENSG00000182628	-2.35212	7.37252	4.62204e-05	0.00184988	SKA2
ENSG00000226900	-2.35173	-1.33099	0.00225652	0.0357853	AL451069.1
ENSG00000197779	-2.34787	1.47504	0.000553469	0.0124193	ZNF81
ENSG00000084710	-2.34484	1.86477	6.48356e-05	0.00242235	EFR3B
ENSG00000084110	-2.34473	-0.0210214	0.00151964	0.0269681	HAL
ENSG00000172748	-2.34221	1.52886	0.000106505	0.00357422	ZNF596
ENSG00000101665	-2.34021	3.06847	5.93382e-05	0.00223624	SMAD7
ENSG00000205323	-2.33835	-0.792018	0.00128051	0.0232397	SARNP
ENSG00000272669	-2.33832	2.10127	7.06834e-05	0.00260554	AL021707.6
ENSG00000261505	-2.33748	1.85662	0.000100381	0.00339877	AL031714.1
ENSG00000161551	-2.33471	1.84361	0.000263271	0.00713443	ZNF577
ENSG00000142396	-2.33403	2.3376	9.77724e-05	0.00332158	ERVK3-1
ENSG00000280010	-2.33386	-1.04336	0.00190516	0.0310407	AP001350.2
ENSG00000070985	-2.33386	-1.11973	0.00325916	0.0468046	TRPM5
ENSG00000177311	-2.33124	4.32313	3.77385e-05	0.00159234	ZBTB38
ENSG00000130203	-2.32683	3.57144	5.85846e-05	0.00221472	APOE
ENSG00000131023	-2.32626	4.16233	8.6651e-05	0.00300947	LATS1
ENSG00000110427	-2.32449	0.237527	0.000170554	0.00502349	KIAA1549L
ENSG00000170855	-2.32254	7.02731	6.45584e-05	0.00241426	TRIAP1
ENSG00000122477	-2.32247	0.493024	0.00147196	0.0262294	LRRC39
ENSG00000197747	-2.3197	9.38549	5.55521e-05	0.00218872	S100A10
ENSG00000125046	-2.31789	0.509426	0.000222371	0.00640054	SSUH2
ENSG00000250220	-2.3175	-0.509489	0.000888613	0.0178887	AC053527.2
ENSG00000243302	-2.3175	-0.473495	0.00112567	0.0209321	AC018638.4
ENSG00000074416	-2.31717	5.09021	7.21204e-05	0.002648	MGLL
ENSG00000185495	-2.31594	-0.146099	0.000470501	0.0112658	AC138393.1
ENSG00000274723	-2.30936	-0.739662	0.000798045	0.016287	AC079906.1
ENSG00000104856	-2.30874	5.87513	4.92983e-05	0.00195629	RELB
ENSG00000169379	-2.30527	3.82644	0.000133303	0.0041951	ARL13B
ENSG00000092200	-2.30506	0.314518	0.000569451	0.0127027	RPGRIP1
ENSG00000165632	-2.30463	6.11894	6.45792e-05	0.00241426	TAF3
ENSG00000120686	-2.30322	6.33125	5.28212e-05	0.00208926	UFM1
ENSG00000198393	-2.30261	2.43073	3.60847e-05	0.0015343	ZNF26
ENSG00000138678	-2.30109	6.32303	6.64323e-05	0.00246833	GPAT3
ENSG00000274943	-2.3006	-0.585641	0.00117173	0.0215766	AC079684.1
ENSG00000164520	-2.30036	2.42458	0.000173642	0.00510699	RAET1E
ENSG00000100292	-2.29794	6.26206	7.31474e-05	0.0026817	HMOX1
ENSG00000112149	-2.29667	5.12161	8.94292e-05	0.00309357	CD83
ENSG00000136167	-2.29664	-1.10114	0.00272006	0.0402793	LCP1
ENSG00000124788	-2.29463	4.2072	6.59444e-05	0.00245356	ATXN1
ENSG00000196873	-2.29405	1.68404	0.000176202	0.00517978	CBWD3
ENSG00000143322	-2.28849	6.15005	9.4868e-05	0.00324654	ABL2
ENSG00000153814	-2.28738	2.47841	0.000224755	0.00645997	JAZF1
ENSG00000255508	-2.2873	0.0549532	0.000581318	0.0129389	AP002990.1
ENSG00000006327	-2.28619	9.03518	6.51254e-05	0.00243019	TNFRSF12A
ENSG00000124145	-2.28407	8.72228	7.67209e-05	0.00279414	SDC4
ENSG00000214212	-2.27977	-0.801099	0.0022433	0.0356221	C19orf38
ENSG00000068028	-2.2778	6.70792	7.21502e-05	0.002648	RASSF1
ENSG00000250590	-2.27554	0.83784	0.000140948	0.00440825	LINC02492
ENSG00000142627	-2.27473	9.03989	6.55778e-05	0.00244406	EPHA2
ENSG00000261534	-2.2702	0.984151	0.000407114	0.00996329	AL596244.1
ENSG00000160712	-2.26748	4.55232	6.33984e-05	0.00237891	IL6R
ENSG00000129538	-2.26621	3.4352	9.27073e-05	0.00318157	RNASE1
ENSG00000182308	-2.26444	0.932399	0.00159609	0.0280103	DCAF4L1
ENSG00000215252	-2.26266	5.05194	0.000110546	0.00368944	GOLGA8B
ENSG00000177469	-2.26158	8.9076	7.71997e-05	0.00280821	CAVIN1
ENSG00000163644	-2.25954	3.75313	0.000235602	0.00652113	PPM1K
ENSG00000145632	-2.25855	7.13135	9.96784e-05	0.00337747	PLK2
ENSG00000085465	-2.25795	4.12095	0.000125379	0.00398292	OVGP1
ENSG00000174099	-2.25199	4.73682	0.000179463	0.00526545	MSRB3
ENSG00000148516	-2.25087	2.22492	0.00018147	0.00532175	ZEB1
ENSG00000251095	-2.24562	3.54473	7.62742e-05	0.00277954	AC093866.1
ENSG00000245149	-2.24165	-0.383867	0.000671735	0.0146821	RNF139-AS1
ENSG00000196159	-2.23966	1.63191	9.53824e-05	0.00324951	FAT4
ENSG00000261889	-2.23714	0.806801	0.000331022	0.00859211	AC108134.2
ENSG00000166311	-2.23528	3.82862	9.33879e-05	0.00320312	SMPD1
ENSG00000083799	-2.2312	4.47445	0.000108196	0.00362538	CYLD
ENSG00000271147	-2.23005	1.50383	0.000799445	0.0163047	ARMCX5-GPRASP2
ENSG00000175556	-2.23004	0.548259	0.00142214	0.0254163	LONRF3
ENSG00000112531	-2.22267	4.81995	0.000110384	0.00368604	QKI
ENSG00000108825	-2.21952	-1.42773	0.00345775	0.0492832	PTGES3L-AARSD1
ENSG00000273032	-2.21918	-1.20123	0.00250622	0.039192	DGCR9
ENSG00000169989	-2.21871	-0.860076	0.00306291	0.0444598	TIGD4
ENSG00000187862	-2.21792	0.0435979	0.000641369	0.0141048	TTC24
ENSG00000185900	-2.21771	0.406698	0.000296489	0.00793795	POMK
ENSG00000102003	-2.21723	2.06101	0.000364257	0.00904308	SYP
ENSG00000163602	-2.2167	5.76092	9.1787e-05	0.00315534	RYBP
ENSG00000164118	-2.21494	2.96965	0.000101417	0.00342621	CEP44
ENSG00000197568	-2.21223	5.31271	0.000127452	0.004034	HHLA3
ENSG00000166900	-2.2122	6.17201	0.000109331	0.00365619	STX3
ENSG00000134313	-2.21076	4.6463	0.000117594	0.00377313	KIDINS220
ENSG00000123358	-2.21003	5.39956	0.000128477	0.00406007	NR4A1
ENSG00000140416	-2.20527	5.857	0.000126305	0.00400395	TPM1
ENSG00000188761	-2.20276	0.19398	0.000399068	0.00977925	BCL2L15
ENSG00000273015	-2.20165	2.97174	0.000223781	0.00643769	AC008124.1
ENSG00000158691	-2.19772	-0.194653	0.0027076	0.0401181	ZSCAN12
ENSG00000087494	-2.19545	0.716769	0.00188313	0.0307562	PTHLH
ENSG00000172687	-2.19505	2.65922	0.000196576	0.00571161	ZNF738
ENSG00000113240	-2.18968	4.10879	0.000286406	0.00769604	CLK4
ENSG00000136052	-2.18963	3.66384	0.000148509	0.00460908	SLC41A2
ENSG00000276966	-2.1877	1.25772	0.000651809	0.0142878	HIST1H4E
ENSG00000114541	-2.18753	0.14073	0.00082813	0.0168275	FRMD4B
ENSG00000236432	-2.18407	-0.0181532	0.000647429	0.0141969	AC097662.1
ENSG00000180071	-2.18121	3.76894	0.00019041	0.00554262	ANKRD18A
ENSG00000268218	-2.17678	1.32183	0.000163191	0.00486935	AC137932.3
ENSG00000204248	-2.17672	4.36138	0.000136997	0.00429798	COL11A2
ENSG00000215915	-2.17655	1.54984	0.000334408	0.00859211	ATAD3C
ENSG00000273373	-2.17593	1.09879	0.000780308	0.0160429	AL355488.1
ENSG00000180336	-2.17214	0.181854	0.000399068	0.00977925	MEIOC
ENSG00000267757	-2.17214	0.181176	0.00146044	0.0260547	EML2-AS1
ENSG00000008516	-2.17181	3.31882	0.000292633	0.00784978	MMP25
ENSG00000118985	-2.1707	5.15026	0.000247516	0.0067406	ELL2
ENSG00000260448	-2.1704	-0.485961	0.00231602	0.036614	LCMT1-AS1
ENSG00000262202	-2.16717	0.421336	0.000412291	0.0100626	AC007952.4
ENSG00000236710	-2.16618	-0.585873	0.00219637	0.0350052	AC108448.2
ENSG00000185527	-2.16489	0.332803	0.000783354	0.0160955	PDE6G
ENSG00000159164	-2.16239	0.268023	0.000525109	0.0118619	SV2A
ENSG00000166592	-2.16208	4.18115	0.000157368	0.00484193	RRAD
ENSG00000182326	-2.16141	2.54908	0.000341869	0.00859211	C1S
ENSG00000279207	-2.15611	4.07949	0.000252891	0.00688078	AC015813.6
ENSG00000103995	-2.15573	4.77902	0.000315069	0.0083189	CEP152
ENSG00000168389	-2.15268	3.79938	0.000320322	0.0084246	MFSD2A
ENSG00000155324	-2.15141	3.58815	0.000136493	0.00428659	GRAMD2B
ENSG00000149289	-2.15141	3.39939	0.000109062	0.00364993	ZC3H12C
ENSG00000259865	-2.15141	2.3508	0.000344645	0.00859211	AL390728.6
ENSG00000186432	-2.1475	6.70325	0.000177921	0.00522272	KPNA4
ENSG00000163121	-2.14723	-1.08231	0.00325916	0.0468046	NEURL3
ENSG00000090530	-2.1422	1.57296	0.000702447	0.0152709	P3H2
ENSG00000242252	-2.14031	-0.129201	0.00177204	0.0290827	BGLAP
ENSG00000113083	-2.13934	-0.624054	0.00289085	0.0423985	LOX
ENSG00000183718	-2.13566	2.63911	0.000172005	0.0050613	TRIM52
ENSG00000139508	-2.13068	1.90454	0.000269114	0.00727003	SLC46A3
ENSG00000272602	-2.13029	1.57073	0.000836313	0.0169749	ZNF595
ENSG00000215009	-2.12836	-0.445451	0.0020361	0.0328477	ACSM4
ENSG00000272899	-2.12787	1.85453	0.000282317	0.00759963	ATP6V1FNB
ENSG00000103196	-2.1258	3.52896	0.000296712	0.00793795	CRISPLD2
ENSG00000123219	-2.125	3.61326	0.000344371	0.00859211	CENPK
ENSG00000158815	-2.1242	1.94783	0.000836786	0.0169749	FGF17
ENSG00000159588	-2.12106	1.19397	0.00103172	0.0203443	CCDC17
ENSG00000151014	-2.12031	3.9258	0.00014873	0.00461148	NOCT
ENSG00000245317	-2.1202	-0.183806	0.00101377	0.0200425	AC008393.1
ENSG00000233966	-2.11995	3.01616	0.000317175	0.00835994	UBE2SP1
ENSG00000230148	-2.1139	-0.0473161	0.00286256	0.0420343	HOXB-AS1
ENSG00000101236	-2.11104	5.09421	0.0002462	0.00671113	RNF24
ENSG00000150938	-2.10886	5.39607	0.000246449	0.00671454	CRIM1
ENSG00000132950	-2.10511	4.00613	0.000296743	0.00793795	ZMYM5
ENSG00000226986	-2.105	-0.372753	0.00284284	0.0417751	AC092017.1
ENSG00000236333	-2.10328	0.545647	0.00103081	0.0203375	TRHDE-AS1
ENSG00000247498	-2.10279	2.86395	0.000272492	0.00735475	GPRC5D-AS1
ENSG00000120129	-2.10099	4.52991	0.000369027	0.00913672	DUSP1
ENSG00000168917	-2.10068	1.7424	0.000335243	0.00859211	SLC35G2
ENSG00000110047	-2.10008	7.335	0.000229135	0.00652113	EHD1
ENSG00000144802	-2.09655	2.47578	0.000390352	0.00958502	NFKBIZ
ENSG00000239388	-2.09582	-0.0900478	0.000983499	0.0195404	ASB14
ENSG00000169193	-2.09402	2.80671	0.000455949	0.0109433	CCDC126
ENSG00000158865	-2.09121	-0.376786	0.00214625	0.0344143	SLC5A11
ENSG00000021488	-2.09121	-0.341018	0.00168403	0.028233	SLC7A9
ENSG00000138685	-2.09038	3.28853	0.00044115	0.0106513	FGF2
ENSG00000198399	-2.08891	5.5981	0.000303455	0.00806487	ITSN2
ENSG00000276023	-2.08729	6.72037	0.000339478	0.00859211	DUSP14
ENSG00000152503	-2.0871	3.55735	0.000223873	0.00643769	TRIM36
ENSG00000137877	-2.08696	1.5616	0.000362368	0.00899988	SPTBN5
ENSG00000136040	-2.08551	6.0258e-06	0.00086445	0.0174777	PLXNC1
ENSG00000260136	-2.0778	1.59703	0.000828096	0.0168275	AC008915.2
ENSG00000259820	-2.0775	-0.0945646	0.00159637	0.0280103	AC083843.3
ENSG00000205485	-2.07473	2.54621	0.000514723	0.0116576	AC004980.1
ENSG00000188981	-2.07428	0.378226	0.00111515	0.0209321	MSANTD1
ENSG00000233461	-2.07237	4.87953	0.000303151	0.00806034	AL445524.1
ENSG00000107738	-2.06824	6.22143	0.000243881	0.00666253	VSIR
ENSG00000132000	-2.06752	0.334416	0.00216538	0.0346752	PODNL1
ENSG00000167552	-2.06369	6.89487	0.00031679	0.00835342	TUBA1A
ENSG00000111011	-2.06337	7.1316	0.000366594	0.00908252	RSRC2
ENSG00000213398	-2.0612	4.63166	0.000263635	0.00714111	LCAT
ENSG00000281706	-2.05781	1.70418	0.000721652	0.0155326	AL009179.1
ENSG00000131061	-2.05656	4.13471	0.000365972	0.00907082	ZNF341
ENSG00000167723	-2.05466	1.14662	0.000455328	0.0109402	TRPV3
ENSG00000253251	-2.05307	2.04514	0.000477979	0.0114134	SHLD3
ENSG00000267769	-2.05134	0.770432	0.0004528	0.0108979	AC011498.6
ENSG00000267510	-2.05108	1.23365	0.00171063	0.028233	AC011451.1
ENSG00000224376	-2.04952	1.90021	0.000243787	0.00666253	AC017104.1
ENSG00000155085	-2.04881	1.59342	0.000507395	0.0115003	AK9
ENSG00000163660	-2.04736	6.68838	0.00035841	0.00890886	CCNL1
ENSG00000170381	-2.04486	0.219825	0.00241414	0.037987	SEMA3E
ENSG00000080823	-2.04267	3.50938	0.000378745	0.00932645	MOK
ENSG00000227671	-2.04203	3.00108	0.000382327	0.00940702	AL390728.4
ENSG00000270804	-2.04124	1.2756	0.000569302	0.0127027	AC010326.4
ENSG00000168811	-2.03723	1.65068	0.000892801	0.0179671	IL12A
ENSG00000197019	-2.03717	7.33622	0.000387579	0.00952851	SERTAD1
ENSG00000206344	-2.03686	-0.283999	0.00200223	0.0323837	HCG27
ENSG00000259426	-2.0358	0.129378	0.000908189	0.0182344	AC027237.3
ENSG00000106366	-2.03268	5.13528	0.00031895	0.00839943	SERPINE1
ENSG00000003436	-2.02861	5.72147	0.000390778	0.0095916	TFPI
ENSG00000183778	-2.02821	1.72409	0.000740717	0.0155326	B3GALT5
ENSG00000225345	-2.02715	0.387083	0.00306977	0.0445274	SNX18P3
ENSG00000233429	-2.02698	4.396	0.000457419	0.0109743	HOTAIRM1
ENSG00000134762	-2.02698	4.40638	0.000498392	0.0114738	DSC3
ENSG00000114529	-2.026	4.82057	0.000388951	0.00955837	C3orf52
ENSG00000165494	-2.02514	5.47546	0.000255132	0.00693554	PCF11
ENSG00000143387	-2.02393	2.79987	0.000657385	0.0143996	CTSK
ENSG00000240476	-2.02378	2.34449	0.000292644	0.00784978	LINC00973
ENSG00000279656	-2.02369	0.2661	0.000797162	0.0162854	AL132780.4
ENSG00000134352	-2.02257	4.98054	0.000294741	0.00790253	IL6ST
ENSG00000123612	-2.01843	1.48618	0.000896965	0.0180329	ACVR1C
ENSG00000262903	-2.01392	0.19741	0.002627	0.0392384	AC027796.4
ENSG00000269982	-2.01292	0.686803	0.000550439	0.0123604	AC018809.2
ENSG00000128510	-2.00923	4.30818	0.000341698	0.00859211	CPA4
ENSG00000243716	-2.00899	0.45224	0.00269453	0.0399341	NPIPB5
ENSG00000100815	-2.00711	4.52793	0.000483751	0.0114738	TRIP11
[truncated: 2,265 more rows]

## Sheet: S Tab 1B Diff Exp DESeq2
ID	baseMean	log2FoldChange	lfcSE	stat	pvalue	padj	Gene
ENSG00000235169	44.405	-9.00214	1.34074	-6.7143	1.89e-11	1.79e-10	SMIM1
ENSG00000130558	42.4132	-8.9302	1.3915	-6.41766	1.38e-10	1.21e-09	OLFM1
ENSG00000171227	36.8574	-8.73052	1.35675	-6.4349	1.24e-10	1.08e-09	TMEM37
ENSG00000272711	32.9996	-8.56666	1.40808	-6.08393	1.17e-09	9.35e-09	AC019069.1
ENSG00000247796	31.8379	-8.51663	1.38863	-6.13309	8.62e-10	6.99e-09	AC008966.1
ENSG00000233901	27.4872	-8.30601	1.40417	-5.91526	3.31e-09	2.52e-08	LINC01503
ENSG00000120337	26.6169	-8.26393	1.42267	-5.80873	6.29e-09	4.64e-08	TNFSF18
ENSG00000225285	23.5432	-8.08434	1.45548	-5.55442	2.79e-08	1.9e-07	LINC01770
ENSG00000281205	21.1934	-7.93502	1.47569	-5.37716	7.57e-08	4.88e-07	#N/A
ENSG00000171766	19.589	-7.81982	1.48581	-5.263	1.42e-07	8.83e-07	GATM
ENSG00000180425	19.069	-7.77289	1.53428	-5.06616	4.06e-07	2.39e-06	C11orf71
ENSG00000101282	16.1449	-7.54614	1.65513	-4.55925	5.13e-06	2.58e-05	RSPO4
ENSG00000107317	15.2598	-7.4619	1.57367	-4.7417	2.12e-06	1.13e-05	PTGDS
ENSG00000259985	14.3112	-7.36085	1.61262	-4.56454	5.01e-06	2.52e-05	AC017100.1
ENSG00000137648	14.0988	-7.34925	1.61714	-4.54459	5.5e-06	2.76e-05	TMPRSS4
ENSG00000175567	201.311	-7.22037	1.62559	-4.44169	8.93e-06	4.31e-05	UCP2
ENSG00000264451	12.0747	-7.12317	1.66969	-4.26615	1.99e-05	9.12e-05	AC036222.1
ENSG00000227620	11.9527	-7.1105	1.68764	-4.21327	2.52e-05	0.000113709	ALG1L8P
ENSG00000273002	11.6224	-7.05834	1.75797	-4.01506	5.94e-05	0.000252426	AL355388.2
ENSG00000228775	11.0838	-7.00283	1.74248	-4.01889	5.85e-05	0.000248749	WEE2-AS1
ENSG00000177112	11.0262	-6.99248	1.69605	-4.12281	3.74e-05	0.000164869	MRVI1-AS1
ENSG00000248243	10.7007	-6.94562	1.7057	-4.072	4.66e-05	0.000201808	LINC02014
ENSG00000172935	10.648	-6.93795	1.70623	-4.06624	4.78e-05	0.000206323	MRGPRF
ENSG00000234390	10.567	-6.91863	1.79186	-3.86115	0.000112854	0.00045762	USP27X-AS1
ENSG00000163467	10.3827	-6.90369	1.82831	-3.776	0.000159369	0.000628816	TSACC
ENSG00000181798	10.2647	-6.8839	1.73392	-3.97014	7.18e-05	0.000301303	LINC00471
ENSG00000225518	10.1465	-6.8769	1.82978	-3.75832	0.000171059	0.000670459	LINC01703
ENSG00000266265	10.1995	-6.87406	1.83283	-3.75051	0.000176473	0.000689104	KLF14
ENSG00000202079	9.88221	-6.8238	1.77774	-3.83847	0.000123801	0.000498477	Y_RNA
ENSG00000160505	9.62089	-6.78956	1.79918	-3.77369	0.000160848	0.000633992	NLRP4
ENSG00000181856	18.714	-6.78284	1.50798	-4.49797	6.86e-06	3.38e-05	SLC2A4
ENSG00000167613	9.48436	-6.77861	1.81201	-3.74094	0.00018333	0.000712641	LAIR1
ENSG00000196748	9.19546	-6.73325	1.81092	-3.71813	0.000200703	0.000773328	CLPSL2
ENSG00000273117	33.9921	-6.72244	1.24937	-5.38065	7.42e-08	4.79e-07	AC144652.1
ENSG00000259088	9.1176	-6.71531	1.77718	-3.77863	0.000157693	0.000622854	AL137779.2
ENSG00000151320	17.6887	-6.69915	1.51347	-4.42636	9.58e-06	4.61e-05	AKAP6
ENSG00000275964	17.5446	-6.68835	1.55382	-4.30445	1.67e-05	7.76e-05	AL355001.2
ENSG00000248375	8.7821	-6.6569	1.82759	-3.64244	0.000270061	0.00101429	AC104066.2
ENSG00000227375	8.55715	-6.62386	1.8273	-3.62495	0.000289013	0.00107839	DLG1-AS1
ENSG00000206417	8.49061	-6.61352	1.81252	-3.64879	0.000263478	0.000991339	H1FX-AS1
ENSG00000274798	8.46546	-6.60373	1.87192	-3.52778	0.000419063	0.00151023	AC025166.1
ENSG00000165879	30.8804	-6.59702	1.26139	-5.22995	1.7e-07	1.05e-06	FRAT1
ENSG00000231920	8.38257	-6.58865	1.83928	-3.58219	0.000340729	0.00125439	NEBL-AS1
ENSG00000271743	8.35056	-6.58504	1.83607	-3.58648	0.000335172	0.00123597	AF287957.1
ENSG00000075673	8.3524	-6.5837	1.85274	-3.55349	0.00038015	0.00138613	ATP12A
ENSG00000249923	8.27446	-6.57351	1.86033	-3.53351	0.000410077	0.00147982	AC007663.2
ENSG00000280916	8.2142	-6.56533	1.83222	-3.58326	0.00033933	0.00124983	FOXCUT
ENSG00000153789	8.19408	-6.5619	1.83085	-3.58407	0.000338275	0.00124644	FAM92B
ENSG00000227619	7.99184	-6.52344	1.87411	-3.48081	0.000499901	0.0017718	AL391056.1
ENSG00000250829	7.98363	-6.52002	1.85465	-3.5155	0.000438926	0.00157534	AC108865.1
ENSG00000205771	7.84098	-6.49669	1.8677	-3.47845	0.000504314	0.00178509	CATSPER2P1
ENSG00000270605	7.69716	-6.46673	1.87588	-3.44731	0.000566199	0.00198554	AL353622.1
ENSG00000102904	15.0316	-6.46163	1.54783	-4.17464	2.98e-05	0.00013362	TSNAXIP1
ENSG00000223813	7.4904	-6.43226	1.91218	-3.36384	0.000768653	0.00261961	AC007255.1
ENSG00000259605	7.3786	-6.41734	2.01307	-3.18784	0.00143342	0.0045918	AC074212.1
ENSG00000137090	7.24668	-6.38737	1.90664	-3.35006	0.000807932	0.00273815	DMRT1
ENSG00000255346	7.1285	-6.36735	1.97177	-3.22925	0.00124116	0.00403685	NOX5
ENSG00000230084	7.18457	-6.36603	1.9543	-3.25745	0.0011242	0.00368949	AC006059.1
ENSG00000181444	195.069	-6.35555	0.482538	-13.1711	1.29e-39	6.63e-38	ZNF467
ENSG00000223742	7.01737	-6.34456	1.99489	-3.18042	0.00147064	0.00469353	AC112495.1
ENSG00000279491	6.91805	-6.3198	1.98259	-3.18765	0.00143436	0.00459404	AP003733.3
ENSG00000166816	62.5258	-6.29745	0.822137	-7.65986	1.86e-14	2.32e-13	LDHD
ENSG00000130307	6.7692	-6.29219	1.98647	-3.16752	0.00153743	0.00488522	USHBP1
ENSG00000222047	6.6367	-6.25459	1.95406	-3.20082	0.00137035	0.00440846	C10orf55
ENSG00000152292	19.9758	-5.93805	1.35638	-4.37787	1.2e-05	5.69e-05	SH2D6
ENSG00000142619	46.4969	-5.82054	0.9179	-6.34115	2.28e-10	1.95e-09	PADI3
ENSG00000160282	9.58231	-5.8054	1.72468	-3.36607	0.00076248	0.00259951	FTCD
ENSG00000243224	17.0618	-5.7871	1.41549	-4.0884	4.34e-05	0.00018926	AC006252.1
ENSG00000230699	8.71858	-5.66207	1.77274	-3.19397	0.00140332	0.00450073	AL645608.2
ENSG00000188488	78.9124	-5.59191	0.659092	-8.48426	2.17e-17	3.4e-16	SERPINA5
ENSG00000104324	31.0763	-5.58109	1.05958	-5.26726	1.38e-07	8.64e-07	CPQ
ENSG00000100100	23.1176	-5.576	1.25106	-4.45703	8.31e-06	4.04e-05	PIK3IP1
ENSG00000155066	70.2288	-5.43369	0.661036	-8.21996	2.04e-16	2.95e-15	PROM2
ENSG00000269388	19.7417	-5.41242	1.24677	-4.34115	1.42e-05	6.65e-05	AC018755.3
ENSG00000259230	25.9519	-5.34101	1.1106	-4.8091	1.52e-06	8.24e-06	LINC02323
ENSG00000099953	105.993	-5.21086	0.546167	-9.54078	1.42e-21	2.96e-20	MMP11
ENSG00000163884	54.4516	-5.20754	0.79001	-6.59173	4.35e-11	3.97e-10	KLF15
ENSG00000212464	30.8416	-5.20531	1.07789	-4.82918	1.37e-06	7.5e-06	SNORA12
ENSG00000183150	17.3932	-5.11924	1.30326	-3.92802	8.56e-05	0.000354607	GPR19
ENSG00000181577	79.7557	-5.11084	0.66179	-7.72276	1.14e-14	1.44e-13	C6orf223
ENSG00000204934	22.3696	-5.08899	1.17209	-4.34182	1.41e-05	6.63e-05	ATP6V0E2-AS1
ENSG00000255468	14.8903	-4.88376	1.36896	-3.5675	0.000360403	0.0013205	AP001107.9
ENSG00000261455	17.667	-4.83755	1.25163	-3.86499	0.000111093	0.000451158	LINC01003
ENSG00000143365	32.837	-4.83001	0.988679	-4.88532	1.03e-06	5.75e-06	RORC
ENSG00000143412	32.6059	-4.81841	0.992424	-4.8552	1.2e-06	6.64e-06	ANXA9
ENSG00000152784	12.9819	-4.80666	1.41339	-3.40082	0.000671849	0.00231687	PRDM8
ENSG00000204710	48.0986	-4.7879	0.754267	-6.34775	2.18e-10	1.87e-09	SPDYC
ENSG00000108244	238.782	-4.7778	1.3456	-3.55069	0.000384223	0.00139882	KRT23
ENSG00000140297	55.7026	-4.70741	0.67593	-6.96435	3.3e-12	3.4e-11	GCNT3
ENSG00000139899	13.1935	-4.69841	1.40328	-3.34816	0.000813494	0.00275502	CBLN3
ENSG00000231023	34.2065	-4.68948	0.976304	-4.8033	1.56e-06	8.48e-06	LINC00326
ENSG00000267296	45.4947	-4.66199	0.838791	-5.55798	2.73e-08	1.86e-07	CEBPA-DT
ENSG00000176909	12.6784	-4.63518	1.41416	-3.2777	0.00104658	0.00345639	MAMSTR
ENSG00000125841	26.5829	-4.62644	1.09333	-4.23152	2.32e-05	0.000105446	NRSN2
ENSG00000237594	20.1717	-4.62045	1.10229	-4.1917	2.77e-05	0.000124341	AP000251.1
ENSG00000177989	67.4266	-4.60602	0.588656	-7.82464	5.09e-15	6.63e-14	ODF3B
ENSG00000183250	16.4035	-4.57915	1.30257	-3.51548	0.000438965	0.00157534	LINC01547
ENSG00000027869	28.073	-4.57415	0.978199	-4.6761	2.92e-06	1.53e-05	SH2D2A
ENSG00000168913	83.2601	-4.5678	0.603723	-7.56605	3.85e-14	4.68e-13	ENHO
ENSG00000012124	71.1553	-4.56226	0.616146	-7.40452	1.32e-13	1.53e-12	CD22
ENSG00000166664	10.6623	-4.43695	1.38859	-3.1953	0.00139685	0.00448149	CHRFAM7A
ENSG00000259291	31.4517	-4.41056	0.901135	-4.89445	9.86e-07	5.51e-06	ZNF710-AS1
ENSG00000187624	32.3482	-4.37378	0.942756	-4.63935	3.5e-06	1.8e-05	C17orf97
ENSG00000197444	239.202	-4.34332	0.338557	-12.8289	1.13e-37	5.39e-36	OGDHL
ENSG00000253210	23.148	-4.29705	1.17071	-3.67047	0.000242107	0.000917324	AC040970.1
ENSG00000136883	100.964	-4.29187	0.491093	-8.73943	2.34e-18	3.89e-17	KIF12
ENSG00000247095	71.0881	-4.27157	0.653215	-6.5393	6.18e-11	5.57e-10	MIR210HG
ENSG00000180644	126.503	-4.27156	1.28501	-3.32414	0.000886915	0.00297761	PRF1
ENSG00000171992	313.791	-4.26533	0.280269	-15.2187	2.66e-52	2.14e-50	SYNPO
ENSG00000142347	32.4978	-4.26081	0.902851	-4.71929	2.37e-06	1.25e-05	MYO1F
ENSG00000151224	28.9114	-4.24673	1.12202	-3.78489	0.000153778	0.000608282	MAT1A
ENSG00000100889	1434.23	-4.24617	0.170105	-24.962	1.58e-137	8.29e-135	PCK2
ENSG00000141639	15.1029	-4.24213	1.23547	-3.43363	0.000595565	0.00207579	MAPK4
ENSG00000180767	29.8623	-4.12333	1.01223	-4.07352	4.63e-05	0.000200658	CHST13
ENSG00000135324	29.3496	-4.08956	0.912345	-4.48247	7.38e-06	3.61e-05	MRAP2
ENSG00000250748	19.327	-4.06558	1.10212	-3.68886	0.000225265	0.000858159	AC025419.1
ENSG00000160233	144.269	-4.03017	0.456483	-8.82872	1.06e-18	1.79e-17	LRRC3
ENSG00000165171	235.086	-4.01879	0.317735	-12.6483	1.14e-36	5.18e-35	METTL27
ENSG00000274828	24.0427	-4.01479	0.891	-4.50594	6.61e-06	3.26e-05	AC068473.5
ENSG00000114378	89.8817	-3.99737	1.23107	-3.24708	0.00116597	0.00381135	HYAL1
ENSG00000230185	19.7815	-3.99602	1.24376	-3.21285	0.00131424	0.00424314	C9orf147
ENSG00000162572	68.2592	-3.98016	0.69015	-5.76709	8.07e-09	5.88e-08	SCNN1D
ENSG00000259803	820.048	-3.97691	0.167543	-23.7367	1.51e-124	6.33e-122	SLC22A31
ENSG00000242193	61.7224	-3.96108	0.637326	-6.21515	5.13e-10	4.23e-09	CRYZL2P
ENSG00000170468	70.9012	-3.94524	0.57362	-6.87779	6.08e-12	6.09e-11	RIOX1
ENSG00000130707	1663.06	-3.93529	0.170186	-23.1235	2.69e-118	1.04e-115	ASS1
ENSG00000237886	65.203	-3.92873	0.697649	-5.63138	1.79e-08	1.25e-07	NALT1
ENSG00000226200	21.4892	-3.91877	1.19002	-3.29304	0.00099111	0.00329219	SGMS1-AS1
ENSG00000122378	64.6142	-3.91871	0.580891	-6.74603	1.52e-11	1.46e-10	PRXL2A
ENSG00000100302	54.8669	-3.91423	0.756773	-5.17227	2.31e-07	1.41e-06	RASD2
ENSG00000140057	30.9697	-3.90995	0.953603	-4.10019	4.13e-05	0.00018062	AK7
ENSG00000186523	41.657	-3.885	0.801352	-4.84805	1.25e-06	6.86e-06	FAM86B1
ENSG00000164362	40.186	-3.87221	0.804927	-4.81064	1.5e-06	8.19e-06	TERT
ENSG00000178947	20.5481	-3.85041	1.11308	-3.45924	0.000541699	0.00190884	SMIM10L2A
ENSG00000174327	37.5322	-3.84857	0.850042	-4.52751	5.97e-06	2.97e-05	SLC16A13
ENSG00000150051	114.358	-3.84314	0.417282	-9.20994	3.26e-20	6.23e-19	MKX
ENSG00000016402	33.0779	-3.83379	1.01907	-3.76205	0.000168525	0.000661351	IL20RA
ENSG00000168918	31.5394	-3.82815	0.906315	-4.22387	2.4e-05	0.000108829	INPP5D
ENSG00000143494	25.053	-3.82778	1.02038	-3.75131	0.000175911	0.000687339	VASH2
ENSG00000165695	46.1003	-3.76804	0.701494	-5.37145	7.81e-08	5.03e-07	AK8
ENSG00000176678	45.1441	-3.75729	0.715235	-5.25323	1.49e-07	9.28e-07	FOXL1
ENSG00000019186	1055.46	-3.74541	0.160026	-23.4051	3.8e-121	1.56e-118	CYP24A1
ENSG00000169683	581.773	-3.744	0.212574	-17.6127	1.97e-69	2.69e-67	LRRC45
ENSG00000167700	648.097	-3.7412	0.186784	-20.0295	3.05e-89	7.37e-87	MFSD3
ENSG00000007314	22.9576	-3.7335	1.08519	-3.44042	0.000580802	0.00203108	SCN4A
ENSG00000121552	330.546	-3.72132	0.27823	-13.375	8.47e-41	4.66e-39	CSTA
ENSG00000130005	1514	-3.72115	0.140031	-26.5738	1.36e-155	1.03e-152	GAMT
ENSG00000102890	982.926	-3.71962	0.163339	-22.7724	8.62e-115	3.13e-112	ELMO3
ENSG00000278023	75.1142	-3.68776	0.565739	-6.51849	7.1e-11	6.38e-10	RDM1
ENSG00000258920	31.0056	-3.6765	1.05035	-3.50025	0.000464826	0.00165931	FOXN3-AS1
ENSG00000259583	20.5048	-3.65859	1.0293	-3.55446	0.000378752	0.00138236	AC015712.2
ENSG00000261713	42.1963	-3.65834	0.786379	-4.65213	3.29e-06	1.7e-05	SSTR5-AS1
ENSG00000174516	99.6211	-3.64521	0.469343	-7.76661	8.06e-15	1.03e-13	PELI3
ENSG00000251602	30.7371	-3.62742	0.923541	-3.92773	8.58e-05	0.000354962	AL928654.1
ENSG00000161681	16.8578	-3.62611	1.14636	-3.16316	0.00156066	0.00495289	SHANK1
ENSG00000258245	30.0649	-3.62219	0.944392	-3.83547	0.000125323	0.000503961	RPL10P13
ENSG00000021300	369.414	-3.61188	0.2316	-15.5953	7.83e-55	6.75e-53	PLEKHB1
ENSG00000110002	56.4019	-3.58512	0.628803	-5.7015	1.19e-08	8.49e-08	VWA5A
ENSG00000135722	55.9709	-3.58215	0.773199	-4.6329	3.61e-06	1.85e-05	FBXL8
ENSG00000180884	42.7975	-3.5727	0.860531	-4.15173	3.3e-05	0.000146857	ZNF792
ENSG00000149654	43.5731	-3.55677	0.72949	-4.8757	1.08e-06	6.02e-06	CDH22
ENSG00000142661	119.053	-3.54045	0.419187	-8.44599	3.01e-17	4.67e-16	MYOM3
ENSG00000157303	146.914	-3.52955	0.94645	-3.72925	0.000192052	0.00074394	SUSD3
ENSG00000162591	299.58	-3.52671	0.710789	-4.96169	6.99e-07	3.97e-06	MEGF6
ENSG00000145103	41.3571	-3.51293	0.731425	-4.80285	1.56e-06	8.49e-06	ILDR1
ENSG00000204624	32.9929	-3.5084	0.980862	-3.57685	0.000347758	0.00127739	DISP3
ENSG00000130303	47.5391	-3.50682	0.742324	-4.72411	2.31e-06	1.22e-05	BST2
ENSG00000117472	120.483	-3.49344	0.527998	-6.61638	3.68e-11	3.39e-10	TSPAN1
ENSG00000189334	2674.09	-3.49273	0.101437	-34.4324	8.26e-260	1.95e-256	S100A14
ENSG00000214049	1184.34	-3.48902	0.137242	-25.4224	1.43e-142	9.28e-140	UCA1
ENSG00000005187	89.24	-3.4775	0.488647	-7.11659	1.11e-12	1.19e-11	ACSM3
ENSG00000007255	345.625	-3.46795	0.306867	-11.3012	1.29e-29	4.2e-28	TRAPPC6A
ENSG00000111087	33.2791	-3.46278	0.833509	-4.15447	3.26e-05	0.000145283	GLI1
ENSG00000149131	42.476	-3.46004	0.835953	-4.13903	3.49e-05	0.000154281	SERPING1
ENSG00000002745	457.973	-3.45065	0.211126	-16.3441	4.8e-60	4.82e-58	WNT16
ENSG00000161082	36.9048	-3.44494	0.843021	-4.08642	4.38e-05	0.000190613	CELF5
ENSG00000110195	148.334	-3.41369	0.395274	-8.63625	5.81e-18	9.43e-17	FOLR1
ENSG00000185630	156.034	-3.40652	0.461456	-7.3821	1.56e-13	1.8e-12	PBX1
ENSG00000172137	187.664	-3.39866	0.417094	-8.14843	3.69e-16	5.22e-15	CALB2
ENSG00000100106	3512.16	-3.39504	0.132257	-25.6701	2.53e-145	1.7e-142	TRIOBP
ENSG00000251669	62.2131	-3.39392	0.680973	-4.98392	6.23e-07	3.57e-06	FAM86EP
ENSG00000107859	31.6856	-3.38633	0.748512	-4.52409	6.07e-06	3.01e-05	PITX3
ENSG00000095539	328.414	-3.38229	0.326889	-10.3469	4.32e-25	1.1e-23	SEMA4G
ENSG00000163322	69.1361	-3.37305	0.608245	-5.54555	2.93e-08	1.99e-07	ABRAXAS1
ENSG00000188878	83.8203	-3.37282	0.529395	-6.37108	1.88e-10	1.62e-09	FBF1
ENSG00000107960	691.325	-3.34335	0.167092	-20.009	4.59e-89	1.1e-86	STN1
ENSG00000169955	22.7543	-3.34294	0.969608	-3.44772	0.000565346	0.00198328	ZNF747
ENSG00000131746	336.087	-3.31087	0.349192	-9.48153	2.51e-21	5.12e-20	TNS4
ENSG00000183048	455.613	-3.30554	0.22493	-14.6958	6.85e-49	5.06e-47	SLC25A10
ENSG00000251161	30.6757	-3.30412	0.950524	-3.4761	0.00050876	0.00179881	AC020661.1
ENSG00000104524	345.441	-3.30124	0.308628	-10.6965	1.06e-26	2.96e-25	PYCR3
ENSG00000275074	103.317	-3.29917	0.597108	-5.52524	3.29e-08	2.22e-07	NUDT18
ENSG00000169126	208.969	-3.29097	0.32287	-10.1929	2.13e-24	5.17e-23	ARMC4
ENSG00000128039	196.023	-3.28787	0.403646	-8.14543	3.78e-16	5.35e-15	SRD5A3
ENSG00000167964	651.657	-3.26836	0.234406	-13.9432	3.46e-44	2.24e-42	RAB26
ENSG00000168517	38.5594	-3.25315	0.735885	-4.42073	9.84e-06	4.73e-05	HEXIM2
ENSG00000196668	102.378	-3.24902	0.533412	-6.09101	1.12e-09	8.97e-09	LINC00173
ENSG00000103253	767.843	-3.23478	0.193115	-16.7505	5.61e-63	6.27e-61	HAGHL
ENSG00000138606	56.1619	-3.22929	0.784226	-4.11781	3.82e-05	0.000168093	SHF
ENSG00000244459	39.2622	-3.2171	0.708692	-4.53949	5.64e-06	2.82e-05	AC147067.1
ENSG00000178026	102.771	-3.18352	0.435367	-7.31226	2.63e-13	2.98e-12	LRRC75B
ENSG00000125968	5726.47	-3.17955	0.102462	-31.0314	2.04e-211	2.75e-208	ID1
ENSG00000142102	585.345	-3.17733	0.219694	-14.4626	2.09e-47	1.47e-45	PGGHG
ENSG00000137103	97.3248	-3.17068	0.477255	-6.64359	3.06e-11	2.84e-10	TMEM8B
ENSG00000261949	170.096	-3.16728	0.339825	-9.32031	1.16e-20	2.29e-19	GFY
ENSG00000197763	164.7	-3.16284	0.337433	-9.37323	7.03e-21	1.41e-19	TXNRD3
ENSG00000198056	300.214	-3.16263	0.288328	-10.9689	5.39e-28	1.61e-26	PRIM1
ENSG00000188483	3144.02	-3.15991	0.110739	-28.5348	4.33e-179	4.54e-176	IER5L
ENSG00000085552	139.759	-3.15885	0.413436	-7.64047	2.16e-14	2.68e-13	IGSF9
ENSG00000182040	57.4811	-3.15035	0.753721	-4.17973	2.92e-05	0.000130911	USH1G
ENSG00000049283	279.691	-3.14671	0.257327	-12.2284	2.19e-34	8.96e-33	EPN3
ENSG00000128965	433.091	-3.14581	0.246719	-12.7506	3.1e-37	1.43e-35	CHAC1
ENSG00000137700	704.377	-3.13251	0.230722	-13.577	5.48e-42	3.32e-40	SLC37A4
ENSG00000003096	38.1856	-3.12839	0.655588	-4.77188	1.83e-06	9.82e-06	KLHL13
ENSG00000213465	513.696	-3.11733	0.223409	-13.9535	3e-44	1.94e-42	ARL2
ENSG00000223572	109.908	-3.11489	0.510567	-6.10086	1.06e-09	8.46e-09	CKMT1A
ENSG00000173267	804.029	-3.10902	0.185635	-16.748	5.86e-63	6.51e-61	SNCG
ENSG00000092621	5502.31	-3.10716	0.101349	-30.658	2.07e-206	2.61e-203	PHGDH
ENSG00000205795	100.057	-3.10549	0.477041	-6.50991	7.52e-11	6.75e-10	CYS1
ENSG00000108641	154.286	-3.10354	0.378811	-8.19286	2.55e-16	3.66e-15	B9D1
ENSG00000187634	62.051	-3.10154	0.620272	-5.00029	5.72e-07	3.3e-06	SAMD11
ENSG00000130313	696.793	-3.10125	0.200914	-15.4357	9.42e-54	7.91e-52	PGLS
ENSG00000110628	539.996	-3.09275	0.200375	-15.4348	9.54e-54	7.97e-52	SLC22A18
ENSG00000006534	465.943	-3.09116	0.222858	-13.8706	9.55e-44	6.1e-42	ALDH3B1
ENSG00000163888	48.1411	-3.08755	0.634098	-4.8692	1.12e-06	6.21e-06	CAMK2N2
ENSG00000166192	54.5975	-3.07214	0.600251	-5.11809	3.09e-07	1.85e-06	SENP8
ENSG00000188130	1260.79	-3.06458	0.171406	-17.8791	1.72e-71	2.57e-69	MAPK12
ENSG00000149476	1257.06	-3.05191	0.135586	-22.509	3.39e-112	1.14e-109	TKFC
ENSG00000162390	157.915	-3.03493	0.47291	-6.41757	1.38e-10	1.21e-09	ACOT11
ENSG00000144455	357.177	-3.03443	0.259194	-11.7072	1.17e-31	4.19e-30	SUMF1
ENSG00000170231	141.752	-3.03305	0.396924	-7.6414	2.15e-14	2.67e-13	FABP6
ENSG00000108932	43.4261	-3.02673	0.692452	-4.37103	1.24e-05	5.86e-05	SLC16A6
ENSG00000188747	294.802	-3.02216	0.266379	-11.3454	7.82e-30	2.56e-28	NOXA1
ENSG00000260461	75.1378	-3.0196	0.487431	-6.19492	5.83e-10	4.79e-09	AL133355.1
ENSG00000159640	42.0729	-3.01588	0.696674	-4.32898	1.5e-05	7.01e-05	ACE
ENSG00000113119	168.158	-3.00927	0.384817	-7.81998	5.28e-15	6.86e-14	TMCO6
ENSG00000138316	280.026	-3.00779	0.30015	-10.021	1.23e-23	2.89e-22	ADAMTS14
ENSG00000161277	28.4255	-2.99152	0.865039	-3.45825	0.000543694	0.00191515	THAP8
ENSG00000184675	49.8046	-2.99082	0.796993	-3.75263	0.00017499	0.00068402	AMER1
ENSG00000116014	38.2941	-2.98873	0.659178	-4.53403	5.79e-06	2.89e-05	KISS1R
ENSG00000187867	121.673	-2.98617	0.431371	-6.92252	4.44e-12	4.5e-11	PALM3
ENSG00000170364	83.425	-2.98495	0.599423	-4.97971	6.37e-07	3.65e-06	SETMAR
ENSG00000181790	63.0129	-2.97821	0.589682	-5.05055	4.41e-07	2.58e-06	ADGRB1
ENSG00000132749	175.503	-2.97288	0.331678	-8.96315	3.16e-19	5.6e-18	TESMIN
ENSG00000230487	28.5321	-2.95566	0.89245	-3.31184	0.000926834	0.00309886	PSMG3-AS1
ENSG00000104814	66.4237	-2.95182	0.562041	-5.25197	1.5e-07	9.34e-07	MAP4K1
ENSG00000232859	46.4158	-2.93235	0.692422	-4.23492	2.29e-05	0.000103935	LYRM9
ENSG00000246465	25.2081	-2.92813	0.804137	-3.64134	0.000271227	0.00101765	AC138904.1
ENSG00000228594	177.082	-2.92579	0.335374	-8.72395	2.69e-18	4.43e-17	FNDC10
ENSG00000012171	387.781	-2.91934	0.263228	-11.0906	1.39e-28	4.31e-27	SEMA3B
ENSG00000169583	211.711	-2.91791	0.342558	-8.51798	1.62e-17	2.57e-16	CLIC3
ENSG00000243479	45.0092	-2.90962	0.634943	-4.58249	4.59e-06	2.33e-05	MNX1-AS1
ENSG00000106077	803.308	-2.90724	0.173883	-16.7195	9.45e-63	1.04e-60	ABHD11
ENSG00000180902	321.027	-2.90607	0.274839	-10.5737	3.94e-26	1.06e-24	D2HGDH
ENSG00000281406	44.0831	-2.90291	0.704302	-4.12169	3.76e-05	0.000165547	BLACAT1
ENSG00000167711	117.739	-2.90069	0.490525	-5.91343	3.35e-09	2.54e-08	SERPINF2
ENSG00000198816	393.781	-2.9002	0.232467	-12.4758	1.01e-35	4.44e-34	ZNF358
ENSG00000137274	184.817	-2.89816	0.339896	-8.52661	1.51e-17	2.39e-16	BPHL
ENSG00000099994	201.899	-2.89123	0.337731	-8.56075	1.12e-17	1.78e-16	SUSD2
ENSG00000164867	176.963	-2.88957	0.325695	-8.87202	7.18e-19	1.24e-17	NOS3
ENSG00000105289	810.348	-2.88743	0.180876	-15.9636	2.29e-57	2.14e-55	TJP3
ENSG00000148219	54.7617	-2.8838	0.567504	-5.08155	3.74e-07	2.21e-06	ASTN2
ENSG00000179886	341.906	-2.88375	0.274069	-10.522	6.84e-26	1.83e-24	TIGD5
ENSG00000169026	39.171	-2.87917	0.651614	-4.41852	9.94e-06	4.78e-05	SLC49A3
ENSG00000160161	284.553	-2.87698	0.251666	-11.4318	2.9e-30	9.73e-29	CILP2
ENSG00000197142	2231.17	-2.8752	0.158656	-18.1222	2.13e-73	3.43e-71	ACSL5
ENSG00000250722	25.1575	-2.87451	0.839475	-3.42418	0.000616666	0.00214301	SELENOP
ENSG00000273314	32.9308	-2.87104	0.705512	-4.06945	4.71e-05	0.000203731	AC005229.4
ENSG00000120049	30.0127	-2.87094	0.84969	-3.37881	0.000728008	0.00249278	KCNIP2
ENSG00000113790	96.579	-2.86893	0.57553	-4.98485	6.2e-07	3.56e-06	EHHADH
ENSG00000255561	42.6951	-2.86651	0.675488	-4.24362	2.2e-05	0.000100203	FDXACB1
ENSG00000149927	155.722	-2.85392	0.341087	-8.36712	5.9e-17	8.93e-16	DOC2A
ENSG00000160172	112.245	-2.85139	0.581215	-4.90592	9.3e-07	5.22e-06	FAM86C2P
ENSG00000111671	197.508	-2.85017	0.387303	-7.359	1.85e-13	2.12e-12	SPSB2
ENSG00000173898	149.32	-2.84972	0.413416	-6.89311	5.46e-12	5.5e-11	SPTBN2
ENSG00000143847	69.1014	-2.83778	0.595609	-4.76449	1.89e-06	1.02e-05	PPFIA4
ENSG00000100968	62.506	-2.82896	0.568941	-4.97234	6.62e-07	3.78e-06	NFATC4
ENSG00000157911	182.371	-2.8274	0.336983	-8.39034	4.85e-17	7.38e-16	PEX10
ENSG00000155254	785.124	-2.82034	0.205775	-13.7059	9.36e-43	5.77e-41	MARVELD1
ENSG00000127084	94.3896	-2.81339	0.490761	-5.73271	9.88e-09	7.12e-08	FGD3
ENSG00000168453	366.934	-2.8108	0.223531	-12.5745	2.92e-36	1.3e-34	HR
ENSG00000243989	40.8385	-2.80509	0.847518	-3.30977	0.000933724	0.00311968	ACY1
ENSG00000196810	111.255	-2.80249	0.407281	-6.88098	5.94e-12	5.97e-11	CTBP1-DT
ENSG00000111077	245.525	-2.80122	0.266266	-10.5204	6.96e-26	1.86e-24	TNS2
ENSG00000172830	646.195	-2.79599	0.189763	-14.7341	3.89e-49	2.88e-47	SSH3
ENSG00000139266	463.947	-2.79384	0.216876	-12.8822	5.67e-38	2.74e-36	39873
ENSG00000111319	926.506	-2.79008	0.187647	-14.8688	5.26e-50	4e-48	SCNN1A
ENSG00000173295	43.195	-2.78391	0.672662	-4.13864	3.49e-05	0.000154508	FAM86B3P
ENSG00000122512	84.8798	-2.78155	0.539994	-5.15108	2.59e-07	1.57e-06	PMS2
ENSG00000141959	2829.82	-2.78098	0.102434	-27.1489	2.61e-162	2.14e-159	PFKL
ENSG00000198121	100.933	-2.78056	0.473635	-5.87068	4.34e-09	3.26e-08	LPAR1
ENSG00000169231	119.874	-2.77813	0.377566	-7.35801	1.87e-13	2.14e-12	THBS3
ENSG00000095066	866.687	-2.7655	0.174681	-15.8317	1.88e-56	1.73e-54	HOOK2
ENSG00000196502	434.49	-2.76529	0.232128	-11.9128	1.02e-32	3.86e-31	SULT1A1
ENSG00000180739	115.141	-2.76286	0.424323	-6.51122	7.45e-11	6.69e-10	S1PR5
ENSG00000179627	90.2112	-2.76014	0.508163	-5.43159	5.59e-08	3.66e-07	ZBTB42
ENSG00000163462	47.6305	-2.75706	0.610613	-4.51523	6.32e-06	3.13e-05	TRIM46
ENSG00000103507	902.936	-2.75021	0.150612	-18.2602	1.72e-74	2.89e-72	BCKDK
ENSG00000166189	614.074	-2.74593	0.167675	-16.3764	2.82e-60	2.86e-58	HPS6
ENSG00000124523	172.176	-2.74583	0.328919	-8.34805	6.94e-17	1.04e-15	SIRT5
ENSG00000149474	137.847	-2.74461	0.392225	-6.99755	2.6e-12	2.71e-11	KAT14
ENSG00000174669	460.897	-2.74346	0.220681	-12.4318	1.76e-35	7.57e-34	SLC29A2
ENSG00000002587	1339.33	-2.74217	0.119618	-22.9244	2.65e-116	9.83e-114	HS3ST1
ENSG00000109107	571.483	-2.73831	0.258137	-10.608	2.74e-26	7.5e-25	ALDOC
ENSG00000154328	498.959	-2.73788	0.220982	-12.3896	2.97e-35	1.26e-33	NEIL2
ENSG00000165912	867.227	-2.736	0.160963	-16.9977	8.55e-65	9.9e-63	PACSIN3
ENSG00000178802	502.091	-2.72209	0.210344	-12.9411	2.64e-38	1.28e-36	MPI
ENSG00000112667	1777.18	-2.72098	0.107324	-25.3531	8.31e-142	5.06e-139	DNPH1
ENSG00000099864	861.484	-2.72074	0.173498	-15.6817	2.02e-55	1.82e-53	PALM
ENSG00000175482	147.881	-2.71997	0.413831	-6.57265	4.94e-11	4.49e-10	POLD4
ENSG00000144591	1063.46	-2.71695	0.19157	-14.1825	1.18e-45	7.87e-44	GMPPA
ENSG00000136490	113.816	-2.71571	0.419023	-6.48105	9.11e-11	8.08e-10	LIMD2
ENSG00000161677	379.296	-2.71392	0.277363	-9.78471	1.31e-22	2.91e-21	JOSD2
ENSG00000129910	75.958	-2.69103	0.531161	-5.06632	4.06e-07	2.39e-06	CDH15
ENSG00000185585	153.612	-2.6855	0.341676	-7.85981	3.85e-15	5.06e-14	OLFML2A
ENSG00000175938	75.5192	-2.68481	0.548818	-4.89198	9.98e-07	5.57e-06	ORAI3
ENSG00000134668	54.9328	-2.68416	0.543103	-4.94227	7.72e-07	4.38e-06	SPOCD1
ENSG00000184508	170.427	-2.68183	0.314896	-8.51654	1.64e-17	2.6e-16	HDDC3
ENSG00000138028	66.7056	-2.67741	0.603316	-4.43783	9.09e-06	4.39e-05	CGREF1
ENSG00000010319	57.9401	-2.67507	0.564788	-4.73641	2.18e-06	1.16e-05	SEMA3G
ENSG00000071246	186.613	-2.67029	0.30016	-8.89623	5.78e-19	1e-17	VASH1
ENSG00000178531	720.445	-2.67023	0.191776	-13.9237	4.55e-44	2.93e-42	CTXN1
ENSG00000235106	226.525	-2.663	0.286261	-9.30269	1.37e-20	2.69e-19	BRD3OS
ENSG00000103044	515.523	-2.65269	0.221703	-11.965	5.42e-33	2.08e-31	HAS3
ENSG00000179528	59.6142	-2.65073	0.518619	-5.11113	3.2e-07	1.91e-06	LBX2
ENSG00000279673	39.1151	-2.64912	0.788904	-3.35798	0.000785149	0.00266812	AC092919.2
ENSG00000089356	161.57	-2.64036	0.329697	-8.00843	1.16e-15	1.59e-14	FXYD3
ENSG00000204852	279.041	-2.63585	0.255619	-10.3116	6.24e-25	1.57e-23	TCTN1
ENSG00000108784	200.759	-2.63521	0.323159	-8.15453	3.51e-16	4.97e-15	NAGLU
ENSG00000131094	116.194	-2.63479	0.405328	-6.50038	8.01e-11	7.16e-10	C1QL1
ENSG00000131650	292.559	-2.62756	0.271647	-9.6727	3.94e-22	8.51e-21	KREMEN2
ENSG00000188051	81.2938	-2.62541	0.597978	-4.39048	1.13e-05	5.4e-05	TMEM221
ENSG00000073849	181.182	-2.62113	0.375123	-6.9874	2.8e-12	2.9e-11	ST6GAL1
ENSG00000205464	138.763	-2.62065	0.515916	-5.07962	3.78e-07	2.23e-06	ATP6AP1L
ENSG00000159214	326.699	-2.61861	0.247718	-10.571	4.06e-26	1.09e-24	CCDC24
ENSG00000196358	37.2099	-2.61552	0.819645	-3.19104	0.00141763	0.004542	NTNG2
ENSG00000103316	99.4787	-2.60429	0.620835	-4.19483	2.73e-05	0.000122782	CRYM
ENSG00000145029	83.3551	-2.604	0.509472	-5.11119	3.2e-07	1.91e-06	NICN1
ENSG00000245848	102.525	-2.6	0.540503	-4.81034	1.51e-06	8.2e-06	CEBPA
ENSG00000170955	262.894	-2.59181	0.317693	-8.15822	3.4e-16	4.83e-15	CAVIN3
ENSG00000130477	373.874	-2.58825	0.222884	-11.6125	3.56e-31	1.25e-29	UNC13A
ENSG00000144504	136.346	-2.58477	0.341988	-7.55806	4.09e-14	4.97e-13	ANKMY1
ENSG00000125520	1569.43	-2.58064	0.129893	-19.8674	7.8e-88	1.8e-85	SLC2A4RG
ENSG00000168209	1565.01	-2.58002	0.148733	-17.3467	2.09e-67	2.65e-65	DDIT4
ENSG00000273145	26.775	-2.57483	0.793465	-3.24504	0.00117434	0.00383738	BX537318.1
ENSG00000129451	127.924	-2.57391	0.447212	-5.75546	8.64e-09	6.28e-08	KLK10
ENSG00000179862	156.192	-2.57075	0.3339	-7.69915	1.37e-14	1.72e-13	CITED4
ENSG00000178057	932.534	-2.56302	0.146711	-17.4699	2.43e-68	3.23e-66	NDUFAF3
ENSG00000187091	206.335	-2.56163	0.286579	-8.93866	3.94e-19	6.93e-18	PLCD1
ENSG00000218510	136.74	-2.55882	0.367425	-6.96421	3.3e-12	3.4e-11	LINC00339
ENSG00000244187	460.13	-2.55215	0.244199	-10.4511	1.45e-25	3.75e-24	TMEM141
ENSG00000265688	164.394	-2.54342	0.368582	-6.90055	5.18e-12	5.23e-11	MAFG-DT
ENSG00000142621	49.9395	-2.54107	0.71643	-3.54686	0.000389858	0.00141687	FHAD1
ENSG00000168243	141.824	-2.53967	0.343236	-7.39921	1.37e-13	1.59e-12	GNG4
ENSG00000125378	1767.72	-2.53201	0.109813	-23.0575	1.24e-117	4.67e-115	BMP4
ENSG00000185100	148.899	-2.53054	0.350761	-7.21442	5.42e-13	5.98e-12	ADSSL1
ENSG00000172508	25.3183	-2.52882	0.77463	-3.26455	0.00109637	0.00360444	CARNS1
ENSG00000182511	274.306	-2.51987	0.323622	-7.78645	6.89e-15	8.87e-14	FES
ENSG00000223478	127.643	-2.51859	0.4372	-5.76073	8.38e-09	6.1e-08	AL441992.1
ENSG00000129455	158.643	-2.51772	0.333824	-7.54206	4.63e-14	5.59e-13	KLK8
ENSG00000184489	358.499	-2.51626	0.328594	-7.65764	1.89e-14	2.36e-13	PTP4A3
ENSG00000184117	2100.91	-2.51539	0.104678	-24.0298	1.36e-127	5.97e-125	NIPSNAP1
ENSG00000160188	30.0703	-2.50935	0.763714	-3.28571	0.00101724	0.00336892	RSPH1
ENSG00000198794	133.62	-2.50102	0.354947	-7.0462	1.84e-12	1.93e-11	SCAMP5
ENSG00000184908	30.4323	-2.4893	0.779181	-3.19477	0.00139942	0.00448899	CLCNKB
ENSG00000185437	47.316	-2.48058	0.726701	-3.41348	0.000641382	0.00222032	SH3BGR
ENSG00000131409	49.0282	-2.47454	0.623214	-3.97061	7.17e-05	0.000300769	LRRC4B
ENSG00000169660	423.259	-2.47062	0.24457	-10.1019	5.42e-24	1.29e-22	HEXD
ENSG00000261373	205.734	-2.47011	0.400089	-6.17391	6.66e-10	5.45e-09	VPS9D1-AS1
ENSG00000196154	4105.68	-2.46992	0.112981	-21.8615	6.05e-106	1.9e-103	S100A4
ENSG00000188176	47.3259	-2.46892	0.660101	-3.74022	0.00018386	0.000714554	SMTNL2
ENSG00000138413	681.455	-2.4686	0.179679	-13.7389	5.93e-43	3.71e-41	IDH1
ENSG00000183248	145.175	-2.46726	0.359745	-6.85836	6.97e-12	6.95e-11	PRR36
ENSG00000132589	1474.14	-2.46624	0.117894	-20.9192	3.58e-97	9.66e-95	FLOT2
ENSG00000204366	133.549	-2.46459	0.370027	-6.66058	2.73e-11	2.55e-10	ZBTB12
ENSG00000088881	168.866	-2.46443	0.391965	-6.28738	3.23e-10	2.72e-09	EBF4
ENSG00000134986	68.9605	-2.46421	0.55745	-4.42051	9.85e-06	4.74e-05	NREP
ENSG00000225968	54.0956	-2.46394	0.607207	-4.05783	4.95e-05	0.000213205	ELFN1
ENSG00000135363	50.3717	-2.4631	0.653862	-3.767	0.000165222	0.00064947	LMO2
ENSG00000168765	185.763	-2.46294	0.341758	-7.20669	5.73e-13	6.32e-12	GSTM4
ENSG00000153406	776.97	-2.4621	0.192081	-12.8181	1.3e-37	6.15e-36	NMRAL1
ENSG00000154134	261.723	-2.45608	0.256806	-9.56394	1.13e-21	2.38e-20	ROBO3
ENSG00000089820	819.68	-2.45596	0.16859	-14.5676	4.51e-48	3.28e-46	ARHGAP4
ENSG00000156398	123.455	-2.45521	0.40813	-6.01574	1.79e-09	1.4e-08	SFXN2
ENSG00000182054	885.289	-2.45518	0.140564	-17.4667	2.57e-68	3.4e-66	IDH2
ENSG00000141401	441.518	-2.45479	0.203605	-12.0566	1.79e-33	6.97e-32	IMPA2
ENSG00000141569	781.222	-2.45396	0.149381	-16.4275	1.22e-60	1.25e-58	TRIM65
ENSG00000108830	35.9694	-2.45244	0.692948	-3.53915	0.000401425	0.00145388	RND2
ENSG00000100802	151.435	-2.45106	0.365208	-6.71142	1.93e-11	1.82e-10	C14orf93
ENSG00000165215	438.413	-2.44707	0.202925	-12.059	1.74e-33	6.8e-32	CLDN3
ENSG00000027001	320.794	-2.44233	0.246602	-9.90395	4e-23	9.18e-22	MIPEP
ENSG00000003989	115.061	-2.44069	0.376257	-6.48677	8.77e-11	7.8e-10	SLC7A2
ENSG00000196220	54.0634	-2.43813	0.58119	-4.19507	2.73e-05	0.000122704	SRGAP3
ENSG00000084693	530.068	-2.43662	0.183337	-13.2904	2.63e-40	1.41e-38	AGBL5
ENSG00000172831	353.167	-2.43147	0.22325	-10.8913	1.27e-27	3.71e-26	CES2
ENSG00000123080	130.583	-2.43105	0.369168	-6.58521	4.54e-11	4.14e-10	CDKN2C
ENSG00000137720	443.712	-2.42121	0.232197	-10.4274	1.86e-25	4.8e-24	C11orf1
ENSG00000105516	947.738	-2.42066	0.146833	-16.4857	4.65e-61	4.9e-59	DBP
ENSG00000160767	967.426	-2.41401	0.136603	-17.6717	6.92e-70	9.61e-68	FAM189B
ENSG00000186007	167.784	-2.41395	0.353988	-6.81931	9.15e-12	9e-11	LEMD1
ENSG00000196132	53.3892	-2.41194	0.571365	-4.22137	2.43e-05	0.000109963	MYT1
ENSG00000013392	132.016	-2.40733	0.439893	-5.47252	4.44e-08	2.94e-07	RWDD2A
ENSG00000050555	216.407	-2.40559	0.290247	-8.28808	1.15e-16	1.7e-15	LAMC3
ENSG00000099999	290.863	-2.40522	0.263525	-9.12713	7.03e-20	1.3e-18	RNF215
ENSG00000197191	50.5395	-2.40483	0.569314	-4.22408	2.4e-05	0.000108754	CYSRT1
ENSG00000156587	407.746	-2.40206	0.221332	-10.8528	1.94e-27	5.61e-26	UBE2L6
ENSG00000160226	190.582	-2.3994	0.309823	-7.74441	9.6e-15	1.22e-13	CFAP410
ENSG00000167965	820.813	-2.39927	0.162249	-14.7876	1.76e-49	1.32e-47	MLST8
ENSG00000169740	126.18	-2.39174	0.43341	-5.51843	3.42e-08	2.3e-07	ZNF32
ENSG00000174791	687.482	-2.39099	0.197923	-12.0804	1.34e-33	5.3e-32	RIN1
ENSG00000110013	422.625	-2.3909	0.212527	-11.2499	2.32e-29	7.46e-28	SIAE
ENSG00000135519	767.204	-2.38785	0.183781	-12.9929	1.34e-38	6.64e-37	KCNH3
ENSG00000278041	96.2324	-2.38152	0.503012	-4.73452	2.2e-06	1.17e-05	AL133325.3
ENSG00000221886	43.0075	-2.37495	0.653995	-3.63145	0.000281833	0.00105389	ZBED8
ENSG00000135074	1037.3	-2.37454	0.152244	-15.597	7.63e-55	6.61e-53	ADAM19
ENSG00000108479	791.026	-2.37286	0.186022	-12.7558	2.89e-37	1.34e-35	GALK1
ENSG00000226137	429.778	-2.37198	0.211129	-11.2347	2.75e-29	8.83e-28	BAIAP2-DT
ENSG00000074181	556.123	-2.36083	0.210353	-11.2232	3.14e-29	1e-27	NOTCH3
ENSG00000170464	78.291	-2.35864	0.492345	-4.79062	1.66e-06	8.99e-06	DNAJC18
ENSG00000173511	526.806	-2.35698	0.230052	-10.2454	1.24e-24	3.06e-23	VEGFB
ENSG00000142273	527.446	-2.34835	0.222594	-10.5499	5.09e-26	1.36e-24	CBLC
ENSG00000233493	221.401	-2.34632	0.288827	-8.12364	4.52e-16	6.36e-15	TMEM238
ENSG00000126583	57.1295	-2.33647	0.577651	-4.04479	5.24e-05	0.000224818	PRKCG
ENSG00000114779	1045.96	-2.33226	0.197551	-11.8059	3.64e-32	1.33e-30	ABHD14B
ENSG00000144063	182.689	-2.33194	0.36584	-6.37421	1.84e-10	1.59e-09	MALL
ENSG00000151917	43.9679	-2.3288	0.690275	-3.37372	0.000741593	0.00253535	BEND6
ENSG00000184709	37.9314	-2.32862	0.635126	-3.66639	0.000245999	0.000931137	LRRC26
ENSG00000162009	120.127	-2.3285	0.453276	-5.13703	2.79e-07	1.68e-06	SSTR5
ENSG00000171954	80.2153	-2.3255	0.611534	-3.80273	0.000143112	0.000569792	CYP4F22
ENSG00000172794	168.959	-2.32295	0.346953	-6.69527	2.15e-11	2.03e-10	RAB37
ENSG00000165716	229.913	-2.31979	0.297755	-7.79095	6.65e-15	8.57e-14	DIPK1B
ENSG00000107821	163.12	-2.31836	0.35854	-6.46612	1.01e-10	8.88e-10	KAZALD1
ENSG00000132470	5303.19	-2.31652	0.0955658	-24.24	8.42e-130	3.88e-127	ITGB4
ENSG00000168481	39.2067	-2.31597	0.679089	-3.41041	0.000648658	0.00224222	LGI3
ENSG00000198915	269.693	-2.31245	0.265643	-8.70508	3.17e-18	5.22e-17	RASGEF1A
ENSG00000154342	92.5231	-2.31195	0.465757	-4.96386	6.91e-07	3.94e-06	WNT3A
ENSG00000186654	299.436	-2.311	0.23444	-9.85752	6.36e-23	1.44e-21	PRR5
ENSG00000181392	356.393	-2.31058	0.229357	-10.0742	7.19e-24	1.7e-22	SYNE4
ENSG00000025708	589.34	-2.30842	0.184059	-12.5418	4.41e-36	1.96e-34	TYMP
ENSG00000133460	142.887	-2.30815	0.356927	-6.46672	1e-10	8.85e-10	SLC2A11
ENSG00000149761	461.851	-2.302	0.193321	-11.9076	1.08e-32	4.09e-31	NUDT22
ENSG00000072310	2983.23	-2.30002	0.111425	-20.6418	1.16e-94	2.99e-92	SREBF1
ENSG00000167925	345.621	-2.29802	0.229804	-9.99989	1.53e-23	3.56e-22	GHDC
ENSG00000106003	124.31	-2.29455	0.391161	-5.86601	4.46e-09	3.34e-08	LFNG
ENSG00000140044	303.822	-2.29296	0.254466	-9.01087	2.04e-19	3.66e-18	JDP2
ENSG00000165282	196.089	-2.28521	0.297771	-7.67441	1.66e-14	2.08e-13	PIGO
ENSG00000132688	314.251	-2.27836	0.289242	-7.87701	3.35e-15	4.42e-14	NES
ENSG00000183208	83.1988	-2.2776	0.474266	-4.80238	1.57e-06	8.51e-06	GDPGP1
ENSG00000099194	7528.61	-2.27686	0.0907627	-25.0859	7.09e-139	3.94e-136	SCD
ENSG00000181513	135.245	-2.27662	0.375165	-6.06832	1.29e-09	1.02e-08	ACBD4
ENSG00000163032	85.835	-2.27356	0.525083	-4.32989	1.49e-05	6.98e-05	VSNL1
ENSG00000197587	49.1347	-2.27213	0.713102	-3.18625	0.00144128	0.0046115	DMBX1
ENSG00000100271	86.3688	-2.27187	0.598016	-3.79901	0.000145276	0.000577676	TTLL1
ENSG00000247596	1724.79	-2.26372	0.111934	-20.2237	6.06e-91	1.55e-88	TWF2
ENSG00000205309	142.035	-2.26309	0.460948	-4.90964	9.12e-07	5.13e-06	NT5M
ENSG00000132535	140.605	-2.26288	0.398625	-5.6767	1.37e-08	9.7e-08	DLG4
ENSG00000134461	107.051	-2.2601	0.405092	-5.57922	2.42e-08	1.66e-07	ANKRD16
ENSG00000101265	60.6576	-2.25875	0.613888	-3.67942	0.000233769	0.000888584	RASSF2
ENSG00000132781	380.587	-2.25011	0.24538	-9.16993	4.73e-20	8.91e-19	MUTYH
ENSG00000213563	792.068	-2.24913	0.158585	-14.1825	1.18e-45	7.87e-44	C8orf82
ENSG00000136327	97.2307	-2.24854	0.477258	-4.71137	2.46e-06	1.3e-05	NKX2-8
ENSG00000109971	12013.8	-2.24734	0.0921978	-24.3752	3.14e-131	1.48e-128	HSPA8
ENSG00000104953	150.135	-2.24371	0.401167	-5.59295	2.23e-08	1.54e-07	TLE6
ENSG00000164088	191.12	-2.24277	0.339941	-6.59754	4.18e-11	3.83e-10	PPM1M
ENSG00000203883	71.3608	-2.24234	0.494109	-4.53814	5.68e-06	2.84e-05	SOX18
ENSG00000123815	423.083	-2.24229	0.214253	-10.4656	1.24e-25	3.25e-24	COQ8B
ENSG00000118894	233.726	-2.24105	0.278446	-8.04841	8.39e-16	1.16e-14	EEF2KMT
ENSG00000169100	11581.3	-2.23857	0.0713234	-31.3862	3.12e-216	4.53e-213	SLC25A6
ENSG00000011523	224.344	-2.23567	0.285812	-7.82218	5.19e-15	6.75e-14	CEP68
ENSG00000111275	734.086	-2.23259	0.192427	-11.6023	4.01e-31	1.4e-29	ALDH2
ENSG00000215271	239.626	-2.2315	0.385646	-5.78641	7.19e-09	5.26e-08	HOMEZ
ENSG00000188690	752.812	-2.23127	0.167032	-13.3583	1.06e-40	5.78e-39	UROS
ENSG00000157184	142.935	-2.22826	0.394476	-5.64865	1.62e-08	1.14e-07	CPT2
ENSG00000142449	73.2561	-2.22754	0.498311	-4.47019	7.82e-06	3.81e-05	FBN3
ENSG00000184194	52.2416	-2.22492	0.611643	-3.63761	0.00027518	0.00103125	GPR173
ENSG00000172456	69.5717	-2.2232	0.649703	-3.42187	0.000621926	0.00215891	FGGY
ENSG00000146070	44.2875	-2.22276	0.617927	-3.59712	0.000321757	0.00119092	PLA2G7
ENSG00000007237	69.9476	-2.21998	0.559883	-3.96508	7.34e-05	0.000307074	GAS7
ENSG00000130511	1543.24	-2.21904	0.124217	-17.8642	2.24e-71	3.33e-69	SSBP4
ENSG00000162344	713.046	-2.21764	0.211647	-10.478	1.09e-25	2.87e-24	FGF19
ENSG00000128311	571.297	-2.21638	0.17541	-12.6354	1.35e-36	6.07e-35	TST
ENSG00000112624	136.824	-2.2143	0.39953	-5.54226	2.99e-08	2.02e-07	BICRAL
ENSG00000229043	147.209	-2.20882	0.392561	-5.62669	1.84e-08	1.28e-07	AC091729.3
ENSG00000255737	68.5801	-2.20747	0.533248	-4.13967	3.48e-05	0.000153889	AGAP2-AS1
ENSG00000162069	241.631	-2.2055	0.336377	-6.55664	5.5e-11	4.99e-10	BICDL2
ENSG00000162426	270.7	-2.20485	0.321014	-6.86838	6.49e-12	6.49e-11	SLC45A1
ENSG00000183010	4693.31	-2.20359	0.0869898	-25.3316	1.43e-141	8.46e-139	PYCR1
ENSG00000143578	189.145	-2.20194	0.324924	-6.77681	1.23e-11	1.19e-10	CREB3L4
ENSG00000049089	68.0544	-2.19782	0.591921	-3.71303	0.000204794	0.000787325	COL9A2
ENSG00000156521	330.046	-2.19425	0.230627	-9.51431	1.83e-21	3.78e-20	TYSND1
ENSG00000167291	646.89	-2.19271	0.157688	-13.9053	5.88e-44	3.76e-42	TBC1D16
ENSG00000065057	466.599	-2.1921	0.193358	-11.337	8.6e-30	2.82e-28	NTHL1
ENSG00000115255	1223.62	-2.19172	0.129691	-16.8996	4.53e-64	5.19e-62	REEP6
ENSG00000150593	398.563	-2.18954	0.237228	-9.22968	2.71e-20	5.22e-19	PDCD4
ENSG00000169174	595.539	-2.18862	0.180663	-12.1143	8.87e-34	3.54e-32	PCSK9
ENSG00000128408	55.2525	-2.18836	0.53715	-4.07403	4.62e-05	0.000200271	RIBC2
ENSG00000261655	36.7311	-2.18779	0.665584	-3.28703	0.00101251	0.00335621	AC100803.3
ENSG00000197070	1016.51	-2.18668	0.148217	-14.7533	2.93e-49	2.18e-47	ARRDC1
ENSG00000107816	1805.11	-2.18333	0.118598	-18.4095	1.1e-75	1.89e-73	LZTS2
ENSG00000132429	132.77	-2.18053	0.384485	-5.6713	1.42e-08	1e-07	POPDC3
ENSG00000178149	539.243	-2.17969	0.202639	-10.7565	5.52e-27	1.57e-25	DALRD3
ENSG00000185847	168.615	-2.17938	0.334814	-6.50922	7.55e-11	6.77e-10	LINC01405
ENSG00000088002	94.2097	-2.17759	0.442097	-4.9256	8.41e-07	4.75e-06	SULT2B1
ENSG00000138375	256.561	-2.17557	0.363633	-5.98287	2.19e-09	1.69e-08	SMARCAL1
ENSG00000142538	97.0922	-2.1691	0.432496	-5.0153	5.3e-07	3.07e-06	PTH2
ENSG00000126882	91.2233	-2.16819	0.420903	-5.15127	2.59e-07	1.57e-06	FAM78A
ENSG00000204128	68.0227	-2.16772	0.536853	-4.03782	5.39e-05	0.000231015	C2orf72
ENSG00000124496	177.859	-2.16325	0.375637	-5.7589	8.47e-09	6.16e-08	TRERF1
ENSG00000117266	389.688	-2.15978	0.224525	-9.6193	6.63e-22	1.42e-20	CDK18
ENSG00000172086	71.0252	-2.15641	0.52617	-4.09832	4.16e-05	0.000181916	KRCC1
ENSG00000251361	54.1512	-2.15578	0.666561	-3.23419	0.0012199	0.00397455	AC012625.1
ENSG00000227403	70.65	-2.155	0.570871	-3.77493	0.000160053	0.00063112	LINC01806
ENSG00000242498	171.154	-2.15111	0.339749	-6.33147	2.43e-10	2.07e-09	ARPIN
ENSG00000127415	208.257	-2.14519	0.325483	-6.5908	4.37e-11	3.99e-10	IDUA
ENSG00000130475	661.646	-2.1434	0.192296	-11.1463	7.46e-29	2.35e-27	FCHO1
ENSG00000063180	537.101	-2.14278	0.203945	-10.5067	8.05e-26	2.14e-24	CA11
ENSG00000260917	203.082	-2.1422	0.29442	-7.27602	3.44e-13	3.87e-12	AL158212.3
ENSG00000042493	2692.6	-2.13971	0.107553	-19.8945	4.54e-88	1.06e-85	CAPG
ENSG00000213889	73.4084	-2.13927	0.553776	-3.86306	0.000111977	0.000454357	PPM1N
ENSG00000263155	38.6903	-2.13702	0.653211	-3.27155	0.00106958	0.00352619	MYZAP
ENSG00000141295	746.954	-2.13636	0.167167	-12.7798	2.13e-37	9.91e-36	SCRN2
ENSG00000204228	244.582	-2.13264	0.291883	-7.30647	2.74e-13	3.11e-12	HSD17B8
ENSG00000130829	327.451	-2.12814	0.239016	-8.90374	5.4e-19	9.42e-18	DUSP9
ENSG00000205363	37.077	-2.12729	0.661924	-3.2138	0.00130992	0.0042321	INSYN1
ENSG00000104883	59.4422	-2.12644	0.556796	-3.81907	0.000133955	0.000536161	PEX11G
ENSG00000205593	147.663	-2.1262	0.331875	-6.40662	1.49e-10	1.29e-09	DENND6B
ENSG00000257261	142.821	-2.12601	0.426397	-4.98599	6.16e-07	3.54e-06	AC008014.1
ENSG00000179178	146.238	-2.12049	0.393076	-5.39461	6.87e-08	4.45e-07	TMEM125
ENSG00000103319	258.846	-2.11763	0.281309	-7.52777	5.16e-14	6.22e-13	EEF2K
ENSG00000124587	613.029	-2.11569	0.182682	-11.5813	5.13e-31	1.78e-29	PEX6
ENSG00000125817	1412.18	-2.11568	0.116125	-18.219	3.65e-74	6.1e-72	CENPB
ENSG00000198598	208.502	-2.11371	0.299951	-7.04686	1.83e-12	1.93e-11	MMP17
ENSG00000158106	824.009	-2.11322	0.15989	-13.2167	7.03e-40	3.67e-38	RHPN1
ENSG00000125967	421.192	-2.10864	0.221779	-9.50782	1.95e-21	4.01e-20	NECAB3
ENSG00000165714	112.228	-2.10755	0.472627	-4.45922	8.23e-06	4e-05	BORCS5
ENSG00000237289	162.83	-2.1051	0.334002	-6.30264	2.93e-10	2.47e-09	CKMT1B
ENSG00000277203	150.341	-2.10389	0.350071	-6.0099	1.86e-09	1.44e-08	F8A1
ENSG00000155792	66.2298	-2.10246	0.541841	-3.88022	0.000104361	0.000425739	DEPTOR
ENSG00000128309	1448.14	-2.1019	0.125042	-16.8096	2.08e-63	2.33e-61	MPST
ENSG00000253982	128.975	-2.09992	0.429039	-4.89447	9.86e-07	5.51e-06	AC100810.1
ENSG00000184588	628.996	-2.09802	0.184341	-11.3812	5.19e-30	1.73e-28	PDE4B
ENSG00000182199	3986.36	-2.09583	0.0825572	-25.3864	3.56e-142	2.24e-139	SHMT2
ENSG00000140854	475.054	-2.0943	0.189708	-11.0396	2.46e-28	7.53e-27	KATNB1
ENSG00000142765	893.698	-2.09325	0.193244	-10.8322	2.42e-27	7.01e-26	SYTL1
ENSG00000204237	674.448	-2.09179	0.189648	-11.0298	2.74e-28	8.37e-27	OXLD1
ENSG00000088280	242.598	-2.08941	0.377467	-5.53536	3.11e-08	2.1e-07	ASAP3
ENSG00000163617	58.724	-2.08788	0.56984	-3.66398	0.000248327	0.000939197	CCDC191
ENSG00000134490	197.858	-2.08647	0.313485	-6.65572	2.82e-11	2.63e-10	TMEM241
ENSG00000165102	174.281	-2.08595	0.30972	-6.73494	1.64e-11	1.57e-10	HGSNAT
ENSG00000185361	419.919	-2.08452	0.214627	-9.7123	2.67e-22	5.83e-21	TNFAIP8L1
ENSG00000137404	169.44	-2.08445	0.36017	-5.7874	7.15e-09	5.23e-08	NRM
ENSG00000254531	279.992	-2.08302	0.278757	-7.47253	7.87e-14	9.34e-13	AP001816.1
ENSG00000099954	66.9697	-2.08277	0.545868	-3.81552	0.000135897	0.000543472	CECR2
ENSG00000171298	2685.05	-2.0827	0.127492	-16.336	5.48e-60	5.47e-58	GAA
ENSG00000168993	217.171	-2.0771	0.345931	-6.00439	1.92e-09	1.49e-08	CPLX1
ENSG00000088543	153.633	-2.07664	0.421595	-4.92568	8.41e-07	4.75e-06	C3orf18
ENSG00000135643	146.181	-2.07601	0.357124	-5.81314	6.13e-09	4.53e-08	KCNMB4
ENSG00000185504	718.516	-2.0759	0.167945	-12.3606	4.27e-35	1.78e-33	FAAP100
ENSG00000135638	52.3663	-2.07589	0.554512	-3.74364	0.000181372	0.000705608	EMX1
ENSG00000185808	214.12	-2.07209	0.388143	-5.33847	9.37e-08	5.98e-07	PIGP
ENSG00000184436	403.53	-2.07159	0.201952	-10.2578	1.09e-24	2.7e-23	THAP7
ENSG00000177732	1267.78	-2.06938	0.176153	-11.7476	7.26e-32	2.63e-30	SOX12
ENSG00000185567	436.921	-2.06854	0.233944	-8.84205	9.4e-19	1.6e-17	AHNAK2
ENSG00000106976	125.598	-2.06715	0.363176	-5.69188	1.26e-08	8.94e-08	DNM1
ENSG00000169035	346.593	-2.06587	0.257665	-8.01767	1.08e-15	1.47e-14	KLK7
ENSG00000137486	211.885	-2.06411	0.273495	-7.54714	4.45e-14	5.39e-13	ARRB1
ENSG00000184986	118.157	-2.06342	0.378265	-5.45496	4.9e-08	3.23e-07	TMEM121
ENSG00000165507	72.3174	-2.06207	0.474924	-4.3419	1.41e-05	6.63e-05	DEPP1
ENSG00000254827	56.7977	-2.06178	0.575947	-3.57982	0.000343838	0.00126475	SLC22A18AS
ENSG00000076555	116.336	-2.05916	0.436972	-4.71233	2.45e-06	1.29e-05	ACACB
ENSG00000171951	147.89	-2.05901	0.518292	-3.97269	7.11e-05	0.000298285	SCG2
ENSG00000090861	4614.16	-2.05846	0.0990035	-20.7917	5.14e-96	1.35e-93	AARS
ENSG00000275183	88.113	-2.05777	0.511943	-4.01952	5.83e-05	0.000248197	LENG9
ENSG00000125375	100.457	-2.054	0.437316	-4.69683	2.64e-06	1.39e-05	DMAC2L
ENSG00000183317	114.387	-2.05223	0.369722	-5.55073	2.84e-08	1.94e-07	EPHA10
ENSG00000171703	415.9	-2.05108	0.206286	-9.94291	2.71e-23	6.24e-22	TCEA2
ENSG00000130270	131.089	-2.0507	0.373436	-5.49144	3.99e-08	2.65e-07	ATP8B3
ENSG00000173546	522.371	-2.04901	0.221134	-9.26591	1.93e-20	3.76e-19	CSPG4
ENSG00000107957	163.555	-2.04877	0.34906	-5.86939	4.37e-09	3.28e-08	SH3PXD2A
ENSG00000173442	1661.4	-2.04643	0.130585	-15.6712	2.38e-55	2.12e-53	EHBP1L1
ENSG00000127399	133.674	-2.04619	0.466364	-4.38753	1.15e-05	5.47e-05	LRRC61
ENSG00000005448	560.535	-2.04258	0.182121	-11.2155	3.42e-29	1.09e-27	WDR54
ENSG00000146376	800.287	-2.03783	0.202119	-10.0823	6.62e-24	1.57e-22	ARHGAP18
ENSG00000006282	963.468	-2.03659	0.16326	-12.4745	1.03e-35	4.5e-34	SPATA20
ENSG00000144120	309.775	-2.03522	0.250505	-8.12446	4.49e-16	6.32e-15	TMEM177
ENSG00000128011	332.656	-2.03445	0.269875	-7.53848	4.75e-14	5.74e-13	LRFN1
ENSG00000160094	111.454	-2.03277	0.435422	-4.66851	3.03e-06	1.58e-05	ZNF362
ENSG00000165795	266.44	-2.03174	0.265939	-7.63988	2.17e-14	2.69e-13	NDRG2
ENSG00000162066	96.1553	-2.0292	0.490818	-4.13431	3.56e-05	0.000157301	AMDHD2
ENSG00000160606	237.417	-2.0281	0.306947	-6.60735	3.91e-11	3.59e-10	TLCD1
ENSG00000171236	70.5103	-2.02703	0.511753	-3.96095	7.47e-05	0.00031202	LRG1
ENSG00000234694	54.5463	-2.02585	0.573515	-3.53234	0.000411906	0.00148613	AL139289.2
ENSG00000181409	75.7991	-2.02346	0.52257	-3.87212	0.000107892	0.000439197	AATK
ENSG00000105088	539.799	-2.02177	0.180971	-11.1718	5.6e-29	1.77e-27	OLFM2
ENSG00000167880	1233.73	-2.01837	0.149395	-13.5102	1.36e-41	7.98e-40	EVPL
ENSG00000117322	36.9057	-2.01734	0.634744	-3.1782	0.00148193	0.00472557	CR2
ENSG00000159166	888.527	-2.01732	0.153086	-13.1777	1.18e-39	6.1e-38	LAD1
ENSG00000133739	142.345	-2.01351	0.408972	-4.92333	8.51e-07	4.8e-06	LRRCC1
ENSG00000163521	56.6206	-2.0121	0.537394	-3.74417	0.000180989	0.000704411	GLB1L
ENSG00000167748	52.2467	-2.01193	0.632093	-3.18296	0.00145778	0.00465798	KLK1
ENSG00000026559	668.099	-2.00994	0.162009	-12.4064	2.41e-35	1.04e-33	KCNG1
ENSG00000149809	843.195	-2.0077	0.182781	-10.9842	4.55e-28	1.36e-26	TM7SF2
ENSG00000119711	171.289	-2.00745	0.347305	-5.78009	7.47e-09	5.45e-08	ALDH6A1
ENSG00000148832	41.1367	-2.00457	0.622785	-3.21873	0.00128762	0.00416573	PAOX
ENSG00000176490	728.177	-2.00444	0.168239	-11.9143	9.97e-33	3.8e-31	DIRAS1
ENSG00000102796	58.181	-2.00211	0.526395	-3.80344	0.000142702	0.000568519	DHRS12
ENSG00000213023	72.2743	-2.00018	0.546905	-3.65727	0.000254914	0.000961989	SYT3
ENSG00000106330	475.999	-1.99974	0.215168	-9.29386	1.49e-20	2.92e-19	MOSPD3
ENSG00000132170	538.759	-1.99952	0.195179	-10.2445	1.25e-24	3.08e-23	PPARG
ENSG00000160193	250.848	-1.99762	0.277849	-7.18959	6.5e-13	7.11e-12	WDR4
ENSG00000235173	400.535	-1.99682	0.236217	-8.45334	2.83e-17	4.4e-16	HGH1
ENSG00000059588	126.733	-1.99501	0.380368	-5.24495	1.56e-07	9.69e-07	TARBP1
ENSG00000130193	502.199	-1.99359	0.197264	-10.1062	5.19e-24	1.23e-22	THEM6
ENSG00000140807	81.5006	-1.9893	0.50016	-3.97733	6.97e-05	0.000293054	NKD1
ENSG00000164649	348.983	-1.98641	0.244213	-8.13391	4.16e-16	5.86e-15	CDCA7L
ENSG00000188938	265.694	-1.98565	0.278999	-7.11705	1.1e-12	1.18e-11	FAM120AOS
ENSG00000130304	435.121	-1.98464	0.192395	-10.3154	6e-25	1.51e-23	SLC27A1
ENSG00000074621	77.9807	-1.98379	0.491161	-4.03899	5.37e-05	0.000230024	SLC24A1
ENSG00000125826	2522.92	-1.98318	0.148026	-13.3975	6.25e-41	3.49e-39	RBCK1
ENSG00000278619	163.847	-1.98292	0.332974	-5.95518	2.6e-09	1.99e-08	MRM1
ENSG00000125895	207.69	-1.97972	0.286046	-6.921	4.48e-12	4.55e-11	TMEM74B
ENSG00000110011	397.168	-1.97585	0.238956	-8.26869	1.35e-16	2e-15	DNAJC4
ENSG00000125089	98.3976	-1.97263	0.472632	-4.17371	3e-05	0.000134074	SH3TC1
ENSG00000120915	256.914	-1.97006	0.312645	-6.30127	2.95e-10	2.5e-09	EPHX2
ENSG00000177181	95.828	-1.96829	0.396175	-4.96824	6.76e-07	3.86e-06	RIMKLA
ENSG00000108439	327.083	-1.96609	0.269763	-7.2882	3.14e-13	3.55e-12	PNPO
ENSG00000145882	251.688	-1.96391	0.344535	-5.70018	1.2e-08	8.54e-08	PCYOX1L
ENSG00000168234	223.96	-1.96263	0.341952	-5.73949	9.5e-09	6.86e-08	TTC39C
ENSG00000106688	108.067	-1.96085	0.43405	-4.51756	6.26e-06	3.1e-05	SLC1A1
ENSG00000164932	64.5206	-1.96011	0.494635	-3.96273	7.41e-05	0.000309981	CTHRC1
ENSG00000125744	419.529	-1.95935	0.193975	-10.101	5.47e-24	1.3e-22	RTN2
ENSG00000185379	124.105	-1.95907	0.383328	-5.11067	3.21e-07	1.92e-06	RAD51D
ENSG00000102743	80.7906	-1.95849	0.500349	-3.91426	9.07e-05	0.000374144	SLC25A15
ENSG00000260328	64.1467	-1.95836	0.495244	-3.95433	7.68e-05	0.000319977	AC104024.2
ENSG00000119669	1124.09	-1.9574	0.144628	-13.5341	9.84e-42	5.84e-40	IRF2BPL
ENSG00000185519	210.663	-1.95468	0.282225	-6.92597	4.33e-12	4.4e-11	FAM131C
ENSG00000126522	406.417	-1.95395	0.194993	-10.0206	1.24e-23	2.9e-22	ASL
ENSG00000177352	416.324	-1.95393	0.241533	-8.08971	5.98e-16	8.33e-15	CCDC71
ENSG00000137135	252.758	-1.9534	0.273391	-7.1451	8.99e-13	9.72e-12	ARHGEF39
ENSG00000183161	67.1388	-1.95123	0.555412	-3.51313	0.000442865	0.00158812	FANCF
ENSG00000272512	53.6988	-1.94742	0.604043	-3.22398	0.00126422	0.00409776	AL645608.7
ENSG00000107537	185.09	-1.94673	0.30922	-6.2956	3.06e-10	2.58e-09	PHYH
ENSG00000180035	389.268	-1.94619	0.210991	-9.22406	2.86e-20	5.48e-19	ZNF48
ENSG00000169750	1509.45	-1.94551	0.110941	-17.5365	7.55e-69	1.02e-66	RAC3
ENSG00000157152	90.4449	-1.94413	0.449631	-4.32383	1.53e-05	7.16e-05	SYN2
ENSG00000213638	156.715	-1.94176	0.342472	-5.66983	1.43e-08	1.01e-07	ADAT3
ENSG00000178821	341.462	-1.93979	0.242516	-7.99861	1.26e-15	1.71e-14	TMEM52
ENSG00000121680	527.092	-1.93967	0.175808	-11.0329	2.65e-28	8.1e-27	PEX16
ENSG00000224081	57.8178	-1.93573	0.587517	-3.29477	0.00098502	0.00327427	SLC44A3-AS1
ENSG00000088836	292.118	-1.93539	0.234382	-8.2574	1.49e-16	2.19e-15	SLC4A11
ENSG00000254837	54.8795	-1.93354	0.592153	-3.26527	0.00109358	0.00359715	AP001372.2
ENSG00000168936	641.602	-1.93258	0.192498	-10.0395	1.02e-23	2.4e-22	TMEM129
ENSG00000139178	211.078	-1.93217	0.293006	-6.59429	4.27e-11	3.91e-10	C1RL
ENSG00000125534	3797.53	-1.93193	0.0960334	-20.1173	5.21e-90	1.29e-87	PPDPF
ENSG00000139405	346.553	-1.93135	0.237145	-8.14417	3.82e-16	5.4e-15	RITA1
ENSG00000167103	294.475	-1.9288	0.274081	-7.03733	1.96e-12	2.06e-11	PIP5KL1
ENSG00000016391	228.268	-1.92769	0.314672	-6.12601	9.01e-10	7.29e-09	CHDH
ENSG00000102871	322.996	-1.92681	0.248441	-7.75561	8.79e-15	1.12e-13	TRADD
ENSG00000167720	114.749	-1.92454	0.579529	-3.32087	0.000897368	0.00300832	SRR
ENSG00000168306	163.838	-1.92415	0.314607	-6.11603	9.59e-10	7.74e-09	ACOX2
ENSG00000100316	63803.3	-1.92335	0.0609144	-31.5746	8.24e-219	1.3e-215	RPL3
ENSG00000135069	2207.51	-1.92151	0.117241	-16.3894	2.28e-60	2.34e-58	PSAT1
ENSG00000110057	1022.42	-1.92126	0.144515	-13.2945	2.49e-40	1.34e-38	UNC93B1
ENSG00000113758	3170.49	-1.9206	0.0867723	-22.1338	1.49e-108	4.86e-106	DBN1
ENSG00000105429	715.077	-1.91784	0.154138	-12.4424	1.54e-35	6.68e-34	MEGF8
ENSG00000105514	153.276	-1.91735	0.367563	-5.21638	1.82e-07	1.12e-06	RAB3D
ENSG00000111602	871.753	-1.91604	0.172681	-11.0958	1.31e-28	4.07e-27	TIMELESS
ENSG00000197958	30727.9	-1.91573	0.059266	-32.3243	3.19e-229	5.47e-226	RPL12
ENSG00000143554	153.699	-1.91439	0.379376	-5.04616	4.51e-07	2.64e-06	SLC27A3
ENSG00000068001	797.088	-1.91418	0.15559	-12.3027	8.75e-35	3.63e-33	HYAL2
ENSG00000157637	1956.42	-1.91209	0.104984	-18.2132	4.05e-74	6.72e-72	SLC38A10
ENSG00000073150	175.686	-1.91083	0.295573	-6.46483	1.01e-10	8.95e-10	PANX2
ENSG00000167994	278.576	-1.9107	0.261282	-7.3128	2.62e-13	2.97e-12	RAB3IL1
ENSG00000103199	153.017	-1.90864	0.338763	-5.63413	1.76e-08	1.23e-07	ZNF500
ENSG00000112234	114.674	-1.89955	0.392573	-4.83873	1.31e-06	7.18e-06	FBXL4
ENSG00000119514	290.096	-1.89922	0.267202	-7.1078	1.18e-12	1.26e-11	GALNT12
ENSG00000077942	506.119	-1.89808	0.187302	-10.1338	3.91e-24	9.38e-23	FBLN1
ENSG00000144567	965.187	-1.89692	0.166267	-11.4088	3.78e-30	1.26e-28	RETREG2
ENSG00000103811	586.359	-1.8968	0.198222	-9.56905	1.08e-21	2.27e-20	CTSH
ENSG00000132182	1939.82	-1.89257	0.12364	-15.3071	6.86e-53	5.66e-51	NUP210
ENSG00000107874	2209.29	-1.89047	0.109659	-17.2396	1.34e-66	1.64e-64	CUEDC2
ENSG00000167680	2253.55	-1.88931	0.103299	-18.2898	9.98e-75	1.7e-72	SEMA6B
ENSG00000146090	47.3132	-1.8871	0.568719	-3.31815	0.000906143	0.00303289	RASGEF1C
ENSG00000181274	165.457	-1.88592	0.379334	-4.97166	6.64e-07	3.79e-06	FRAT2
ENSG00000181481	210.921	-1.88582	0.33739	-5.58943	2.28e-08	1.57e-07	RNF135
ENSG00000103260	2819.35	-1.88566	0.130862	-14.4096	4.5e-47	3.14e-45	METRN
ENSG00000107331	1796.65	-1.88511	0.127147	-14.8263	9.91e-50	7.45e-48	ABCA2
ENSG00000075043	1076.38	-1.88465	0.126375	-14.9132	2.7e-50	2.08e-48	KCNQ2
ENSG00000073536	651.575	-1.88444	0.221594	-8.50403	1.83e-17	2.87e-16	NLE1
ENSG00000185885	69.2117	-1.88332	0.456836	-4.12253	3.75e-05	0.000165028	IFITM1
ENSG00000187994	289.631	-1.88297	0.234558	-8.02773	9.93e-16	1.36e-14	RINL
ENSG00000160326	191.995	-1.88275	0.30785	-6.11579	9.61e-10	7.74e-09	SLC2A6
ENSG00000089116	88.1306	-1.88079	0.419743	-4.48081	7.44e-06	3.64e-05	LHX5
ENSG00000160953	577.503	-1.87997	0.203524	-9.23713	2.53e-20	4.87e-19	PWWP3A
ENSG00000178425	499.026	-1.87982	0.24613	-7.63749	2.22e-14	2.74e-13	NT5DC1
ENSG00000212864	372.015	-1.87659	0.253918	-7.39055	1.46e-13	1.69e-12	RNF208
ENSG00000185269	243.452	-1.87628	0.344879	-5.44039	5.32e-08	3.49e-07	NOTUM
ENSG00000116497	255.62	-1.87204	0.33653	-5.56279	2.65e-08	1.81e-07	S100PBP
ENSG00000116574	79.4133	-1.87076	0.487258	-3.83937	0.000123351	0.000497088	RHOU
ENSG00000133433	49.0526	-1.87075	0.577883	-3.23725	0.00120689	0.00393695	GSTT2B
ENSG00000166924	138.037	-1.86916	0.351714	-5.31444	1.07e-07	6.76e-07	NYAP1
ENSG00000145214	461.707	-1.86672	0.222205	-8.40088	4.43e-17	6.77e-16	DGKQ
ENSG00000151065	237.207	-1.8658	0.252848	-7.37911	1.59e-13	1.83e-12	DCP1B
ENSG00000187840	2269.5	-1.8656	0.122399	-15.242	1.86e-52	1.5e-50	EIF4EBP1
ENSG00000165475	637.603	-1.86525	0.181012	-10.3046	6.72e-25	1.68e-23	CRYL1
ENSG00000236081	362.769	-1.86486	0.259948	-7.17398	7.28e-13	7.93e-12	ELFN1-AS1
ENSG00000167191	95.2788	-1.86241	0.487563	-3.81984	0.000133536	0.000534712	GPRC5B
ENSG00000213930	264.742	-1.86238	0.251313	-7.41062	1.26e-13	1.46e-12	GALT
ENSG00000164638	457.238	-1.86147	0.216816	-8.5855	9.04e-18	1.45e-16	SLC29A4
ENSG00000137834	67.1368	-1.86125	0.502241	-3.7059	0.000210643	0.000807345	SMAD6
ENSG00000198715	189.476	-1.85995	0.328794	-5.65687	1.54e-08	1.08e-07	GLMP
ENSG00000171798	57.1162	-1.85927	0.576291	-3.22628	0.00125411	0.00407339	KNDC1
ENSG00000133250	237.48	-1.85845	0.284141	-6.54059	6.13e-11	5.52e-10	ZNF414
ENSG00000162396	131.97	-1.85809	0.418406	-4.44088	8.96e-06	4.33e-05	PARS2
ENSG00000122971	477.207	-1.85623	0.218832	-8.48245	2.21e-17	3.45e-16	ACADS
ENSG00000160211	2196.61	-1.85386	0.119031	-15.5746	1.08e-54	9.22e-53	G6PD
ENSG00000006016	756.216	-1.85158	0.16465	-11.2456	2.44e-29	7.82e-28	CRLF1
ENSG00000102878	136.048	-1.85154	0.425573	-4.35069	1.36e-05	6.39e-05	HSF4
ENSG00000186994	253.219	-1.8491	0.261511	-7.07082	1.54e-12	1.63e-11	KANK3
ENSG00000258429	144.253	-1.84818	0.34496	-5.35765	8.43e-08	5.41e-07	PDF
ENSG00000210196	661.085	-1.84815	0.207099	-8.92395	4.5e-19	7.87e-18	MT-TP
ENSG00000099330	386.875	-1.84808	0.218745	-8.44856	2.95e-17	4.58e-16	OCEL1
ENSG00000108528	949.684	-1.848	0.13884	-13.3103	2.02e-40	1.1e-38	SLC25A11
ENSG00000101224	3703.85	-1.84573	0.108542	-17.0047	7.57e-65	8.88e-63	CDC25B
ENSG00000167105	151.102	-1.8453	0.332844	-5.54403	2.96e-08	2e-07	TMEM92
ENSG00000091622	54.1258	-1.84259	0.544194	-3.38591	0.000709433	0.00243271	PITPNM3
ENSG00000196422	491.979	-1.84247	0.200373	-9.19522	3.74e-20	7.1e-19	PPP1R26
ENSG00000140006	192.086	-1.84192	0.312267	-5.89853	3.67e-09	2.77e-08	WDR89
ENSG00000183251	85.804	-1.84042	0.470355	-3.91282	9.12e-05	0.000376053	OR51B4
ENSG00000105419	560.093	-1.83948	0.17489	-10.5179	7.14e-26	1.9e-24	MEIS3
ENSG00000283041	413.989	-1.83828	0.233961	-7.85719	3.93e-15	5.16e-14	AC008038.1
ENSG00000170430	414.859	-1.83767	0.252533	-7.27694	3.41e-13	3.85e-12	MGMT
ENSG00000184428	1232.01	-1.83762	0.122075	-15.0532	3.29e-51	2.59e-49	TOP1MT
ENSG00000054179	455.587	-1.83558	0.208835	-8.78965	1.5e-18	2.52e-17	ENTPD2
ENSG00000164904	1224.57	-1.83408	0.136942	-13.3931	6.63e-41	3.66e-39	ALDH7A1
ENSG00000158623	511.226	-1.83222	0.199396	-9.18887	3.97e-20	7.52e-19	COPG2
ENSG00000164062	2896.35	-1.83205	0.104171	-17.5869	3.1e-69	4.21e-67	APEH
ENSG00000203499	455.704	-1.83184	0.244986	-7.47732	7.59e-14	9.01e-13	IQANK1
ENSG00000149782	2333.04	-1.83154	0.102876	-17.8035	6.64e-71	9.72e-69	PLCB3
ENSG00000102125	274.059	-1.82803	0.270034	-6.76964	1.29e-11	1.25e-10	TAZ
ENSG00000005513	124.198	-1.82627	0.413483	-4.4168	1e-05	4.81e-05	SOX8
ENSG00000023839	638.142	-1.82624	0.180017	-10.1448	3.49e-24	8.38e-23	ABCC2
ENSG00000105486	1114.95	-1.82248	0.15419	-11.8197	3.09e-32	1.14e-30	LIG1
ENSG00000137133	503.918	-1.82212	0.199286	-9.14323	6.06e-20	1.13e-18	HINT2
ENSG00000160323	118.81	-1.81922	0.398776	-4.562	5.07e-06	2.55e-05	ADAMTS13
ENSG00000175600	63.8421	-1.81622	0.519869	-3.49362	0.000476526	0.00169813	SUGCT
ENSG00000138085	1153.09	-1.8137	0.145501	-12.4652	1.16e-35	5.04e-34	ATRAID
ENSG00000131188	698.468	-1.8088	0.166536	-10.8613	1.76e-27	5.13e-26	PRR7
ENSG00000149743	509.586	-1.80836	0.189189	-9.55846	1.2e-21	2.51e-20	TRPT1
ENSG00000049130	3529.66	-1.80792	0.0946125	-19.1087	2.14e-81	4.08e-79	KITLG
ENSG00000060642	160.117	-1.80773	0.318209	-5.68096	1.34e-08	9.48e-08	PIGV
ENSG00000161179	1075.08	-1.80509	0.133107	-13.5613	6.8e-42	4.07e-40	YDJC
ENSG00000167608	643.071	-1.80375	0.195088	-9.2458	2.33e-20	4.51e-19	TMC4
ENSG00000186998	285.569	-1.80261	0.282874	-6.37248	1.86e-10	1.61e-09	EMID1
ENSG00000164885	315.579	-1.80183	0.234433	-7.68591	1.52e-14	1.9e-13	CDK5
ENSG00000103876	290.227	-1.80123	0.262875	-6.85207	7.28e-12	7.25e-11	FAH
ENSG00000122642	952.899	-1.79778	0.140174	-12.8253	1.18e-37	5.61e-36	FKBP9
ENSG00000143390	480.573	-1.79713	0.219922	-8.17169	3.04e-16	4.33e-15	RFX5
ENSG00000113763	218.256	-1.79699	0.294453	-6.10281	1.04e-09	8.37e-09	UNC5A
ENSG00000136840	648.943	-1.79538	0.159926	-11.2264	3.03e-29	9.69e-28	ST6GALNAC4
ENSG00000178927	894.645	-1.79537	0.151163	-11.8771	1.56e-32	5.83e-31	CYBC1
ENSG00000105373	7566.19	-1.79526	0.0843143	-21.2925	1.33e-100	3.82e-98	NOP53
ENSG00000110844	90.4232	-1.79504	0.449762	-3.99109	6.58e-05	0.000277352	PRPF40B
ENSG00000100599	460.514	-1.79414	0.220581	-8.13371	4.16e-16	5.86e-15	RIN3
ENSG00000053918	266.577	-1.79397	0.258006	-6.95323	3.57e-12	3.65e-11	KCNQ1
ENSG00000197457	3195.61	-1.79268	0.0996425	-17.9911	2.29e-72	3.57e-70	STMN3
ENSG00000106123	222.597	-1.79226	0.307819	-5.82245	5.8e-09	4.3e-08	EPHB6
ENSG00000133943	695.459	-1.79082	0.192844	-9.28638	1.6e-20	3.13e-19	DGLUCY
ENSG00000169169	193.829	-1.79025	0.36133	-4.95461	7.25e-07	4.12e-06	CPT1C
ENSG00000148803	116.976	-1.79001	0.415714	-4.30586	1.66e-05	7.71e-05	FUOM
ENSG00000092036	211.777	-1.78425	0.290343	-6.14534	7.98e-10	6.5e-09	HAUS4
ENSG00000186806	70.8838	-1.78332	0.506011	-3.52428	0.000424638	0.00152769	VSIG10L
ENSG00000005961	61.9887	-1.78253	0.517485	-3.44459	0.000571917	0.0020041	ITGA2B
ENSG00000105251	63.2627	-1.7824	0.533517	-3.34085	0.000835234	0.00282207	SHD
ENSG00000043143	389.692	-1.78188	0.247364	-7.20344	5.87e-13	6.46e-12	JADE2
ENSG00000160703	303.936	-1.78136	0.24422	-7.29409	3.01e-13	3.4e-12	NLRX1
ENSG00000125459	195.365	-1.78101	0.317861	-5.6031	2.11e-08	1.46e-07	MSTO1
ENSG00000136279	698.585	-1.77744	0.195916	-9.07242	1.16e-19	2.11e-18	DBNL
ENSG00000095321	536.561	-1.77519	0.186806	-9.50284	2.04e-21	4.2e-20	CRAT
ENSG00000174950	237.281	-1.77517	0.290742	-6.10564	1.02e-09	8.23e-09	CD164L2
ENSG00000162976	176.44	-1.77389	0.30548	-5.80689	6.36e-09	4.69e-08	SLC66A3
ENSG00000198945	225.449	-1.77332	0.263583	-6.72773	1.72e-11	1.64e-10	L3MBTL3
ENSG00000114626	345.972	-1.77261	0.258138	-6.8669	6.56e-12	6.56e-11	ABTB1
ENSG00000109790	163.006	-1.77016	0.30515	-5.80093	6.59e-09	4.85e-08	KLHL5
ENSG00000244486	93.6603	-1.76937	0.430955	-4.1057	4.03e-05	0.000176657	SCARF2
ENSG00000104835	97.2967	-1.7687	0.409225	-4.32208	1.55e-05	7.21e-05	SARS2
ENSG00000154102	311.553	-1.76826	0.250636	-7.0551	1.72e-12	1.82e-11	C16orf74
ENSG00000134569	88.6935	-1.76789	0.553266	-3.19538	0.00139647	0.00448105	LRP4
ENSG00000020181	145.252	-1.76713	0.370617	-4.76807	1.86e-06	1e-05	ADGRA2
ENSG00000186635	682.022	-1.76644	0.172898	-10.2167	1.67e-24	4.08e-23	ARAP1
ENSG00000110697	1071.02	-1.76641	0.124428	-14.1963	9.66e-46	6.54e-44	PITPNM1
ENSG00000204438	277.14	-1.76319	0.277753	-6.34805	2.18e-10	1.87e-09	GPANK1
ENSG00000258199	69.5794	-1.7629	0.516466	-3.41339	0.000641601	0.00222067	AC073896.4
ENSG00000183186	187.231	-1.76201	0.290784	-6.05949	1.37e-09	1.08e-08	C2CD4C
ENSG00000181031	159.135	-1.76074	0.360939	-4.87822	1.07e-06	5.95e-06	RPH3AL
ENSG00000149499	1306.41	-1.76058	0.124661	-14.1229	2.75e-45	1.82e-43	EML3
ENSG00000179912	348.989	-1.76047	0.233928	-7.52571	5.24e-14	6.31e-13	R3HDM2
ENSG00000182704	419.379	-1.7602	0.203456	-8.65148	5.08e-18	8.28e-17	TSKU
ENSG00000254470	258.691	-1.75988	0.276529	-6.36418	1.96e-10	1.69e-09	AP5B1
ENSG00000100129	2883.26	-1.75812	0.108473	-16.2079	4.43e-59	4.32e-57	EIF3L
ENSG00000104889	1214.21	-1.75691	0.120877	-14.5347	7.3e-48	5.26e-46	RNASEH2A
ENSG00000136026	983.424	-1.75674	0.141223	-12.4394	1.6e-35	6.91e-34	CKAP4
ENSG00000105649	207.242	-1.75209	0.315975	-5.54504	2.94e-08	1.99e-07	RAB3A
ENSG00000008382	348.526	-1.75128	0.245247	-7.1409	9.27e-13	1e-11	MPND
ENSG00000238227	740.045	-1.75118	0.154482	-11.3358	8.72e-30	2.85e-28	TMEM250
ENSG00000103018	6467.09	-1.74953	0.0884592	-19.7779	4.62e-87	1.05e-84	CYB5B
ENSG00000171425	592.297	-1.74716	0.171692	-10.1761	2.54e-24	6.12e-23	ZNF581
ENSG00000185670	73.9468	-1.74547	0.46144	-3.78266	0.000155163	0.000613377	ZBTB3
ENSG00000241945	122.7	-1.74404	0.386913	-4.50759	6.56e-06	3.24e-05	PWP2
ENSG00000158292	184.316	-1.74159	0.328268	-5.30539	1.12e-07	7.09e-07	GPR153
ENSG00000215256	141.58	-1.74058	0.387121	-4.49622	6.92e-06	3.4e-05	DHRS4-AS1
ENSG00000196405	221.578	-1.74048	0.327675	-5.31162	1.09e-07	6.86e-07	EVL
ENSG00000165757	357.056	-1.73999	0.256911	-6.77274	1.26e-11	1.22e-10	JCAD
ENSG00000171435	90.3875	-1.73974	0.513345	-3.38902	0.000701424	0.00240962	KSR2
ENSG00000131016	7855.03	-1.73821	0.0900421	-19.3044	4.93e-83	9.91e-81	AKAP12
ENSG00000185875	96.7549	-1.73756	0.489222	-3.55168	0.000382785	0.00139412	THNSL1
ENSG00000106327	115.657	-1.7365	0.405807	-4.27913	1.88e-05	8.62e-05	TFR2
ENSG00000204060	144.96	-1.73638	0.356232	-4.87428	1.09e-06	6.06e-06	FOXO6
ENSG00000007520	894.804	-1.73593	0.150862	-11.5067	1.22e-30	4.18e-29	TSR3
ENSG00000100075	2516.08	-1.73367	0.106448	-16.2866	1.23e-59	1.21e-57	SLC25A1
ENSG00000121281	95.9863	-1.7292	0.431386	-4.00847	6.11e-05	0.000259054	ADCY7
ENSG00000124766	1639.67	-1.72869	0.147782	-11.6975	1.31e-31	4.68e-30	SOX4
ENSG00000115257	73.45	-1.72751	0.505484	-3.41753	0.000631917	0.00218956	PCSK4
ENSG00000160460	106.951	-1.72484	0.402995	-4.28006	1.87e-05	8.59e-05	SPTBN4
ENSG00000087842	359.546	-1.72356	0.259516	-6.64146	3.11e-11	2.88e-10	PIR
ENSG00000088367	465.401	-1.72332	0.217011	-7.94118	2e-15	2.68e-14	EPB41L1
ENSG00000054392	68.4075	-1.72146	0.502789	-3.42382	0.000617467	0.00214501	HHAT
ENSG00000170469	60.1276	-1.72104	0.528699	-3.25524	0.00113296	0.00371309	SPATA24
ENSG00000235750	622.103	-1.71995	0.196554	-8.75055	2.12e-18	3.54e-17	KIAA0040
ENSG00000101311	323.195	-1.71929	0.297857	-5.7722	7.82e-09	5.71e-08	FERMT1
ENSG00000125247	175.43	-1.71831	0.324862	-5.28936	1.23e-07	7.7e-07	TMTC4
ENSG00000144827	2315.16	-1.71546	0.111688	-15.3594	3.06e-53	2.54e-51	ABHD10
ENSG00000225138	301.685	-1.71457	0.274471	-6.2468	4.19e-10	3.49e-09	SLC9A3-AS1
ENSG00000149823	1217.08	-1.71328	0.127003	-13.4901	1.79e-41	1.04e-39	VPS51
ENSG00000160345	104.914	-1.71324	0.452117	-3.78939	0.00015102	0.0005985	C9orf116
ENSG00000269609	198.543	-1.71301	0.315555	-5.42857	5.68e-08	3.72e-07	RPARP-AS1
ENSG00000021826	238.207	-1.7082	0.274591	-6.22088	4.94e-10	4.08e-09	CPS1
ENSG00000003147	225.949	-1.70791	0.267143	-6.39323	1.62e-10	1.41e-09	ICA1
ENSG00000167703	255.626	-1.70777	0.297698	-5.7366	9.66e-09	6.97e-08	SLC43A2
ENSG00000160221	86.7047	-1.70554	0.507767	-3.35891	0.000782505	0.00266057	GATD3A
ENSG00000167799	180.292	-1.70407	0.33147	-5.14093	2.73e-07	1.65e-06	NUDT8
ENSG00000204304	784.801	-1.70294	0.166259	-10.2426	1.28e-24	3.14e-23	PBX2
ENSG00000272325	557.404	-1.70119	0.199686	-8.51933	1.6e-17	2.54e-16	NUDT3
ENSG00000167311	73.3247	-1.70108	0.457025	-3.72207	0.000197597	0.000762603	ART5
ENSG00000170915	124.832	-1.70058	0.381009	-4.46336	8.07e-06	3.93e-05	PAQR8
ENSG00000158856	1006.26	-1.69997	0.151758	-11.2018	3.99e-29	1.27e-27	DMTN
ENSG00000067836	320.24	-1.69834	0.248129	-6.84461	7.67e-12	7.62e-11	ROGDI
ENSG00000128165	198.535	-1.69722	0.298437	-5.68704	1.29e-08	9.18e-08	ADM2
ENSG00000184702	130.543	-1.69621	0.375204	-4.52076	6.16e-06	3.06e-05	SEPTIN5
ENSG00000102981	113.282	-1.69606	0.437467	-3.877	0.000105753	0.000431138	PARD6A
ENSG00000255284	94.9526	-1.69579	0.447249	-3.7916	0.000149678	0.000593682	AP006621.3
ENSG00000090971	703.471	-1.69504	0.244726	-6.92628	4.32e-12	4.39e-11	NAT14
ENSG00000099977	562.155	-1.69154	0.195485	-8.65303	5.01e-18	8.17e-17	DDT
ENSG00000103528	126.113	-1.68843	0.42356	-3.98628	6.71e-05	0.000282655	SYT17
ENSG00000169189	1325.83	-1.68746	0.125129	-13.4858	1.9e-41	1.1e-39	NSMCE1
ENSG00000063046	7527.22	-1.68607	0.0637198	-26.4607	2.75e-154	1.99e-151	EIF4B
ENSG00000120068	718.888	-1.68478	0.160947	-10.4679	1.21e-25	3.18e-24	HOXB8
ENSG00000140905	209.179	-1.68276	0.30093	-5.59188	2.25e-08	1.55e-07	GCSH
ENSG00000183751	1319.46	-1.6817	0.152608	-11.0198	3.07e-28	9.32e-27	TBL3
ENSG00000006756	168.341	-1.68145	0.300384	-5.59767	2.17e-08	1.5e-07	ARSD
ENSG00000165905	810.73	-1.6814	0.158916	-10.5805	3.67e-26	9.92e-25	LARGE2
ENSG00000116990	149.749	-1.68139	0.325656	-5.16309	2.43e-07	1.47e-06	MYCL
ENSG00000173137	430.808	-1.68122	0.195288	-8.60888	7.38e-18	1.19e-16	ADCK5
ENSG00000136261	1721.14	-1.68095	0.128271	-13.1047	3.1e-39	1.56e-37	BZW2
ENSG00000161618	481.838	-1.68022	0.186601	-9.00432	2.17e-19	3.87e-18	ALDH16A1
ENSG00000178202	257.701	-1.67689	0.247452	-6.77664	1.23e-11	1.19e-10	POGLUT3
ENSG00000177646	586.358	-1.67588	0.191076	-8.77079	1.77e-18	2.97e-17	ACAD9
ENSG00000198417	81.3647	-1.67543	0.460901	-3.63512	0.000277853	0.00104045	MT1F
ENSG00000136378	244.496	-1.67493	0.281117	-5.95814	2.55e-09	1.96e-08	ADAMTS7
ENSG00000068137	894.833	-1.67358	0.164184	-10.1933	2.12e-24	5.15e-23	PLEKHH3
ENSG00000136213	325.212	-1.67263	0.225758	-7.40892	1.27e-13	1.48e-12	CHST12
ENSG00000204356	1303.69	-1.67165	0.118487	-14.1083	3.37e-45	2.21e-43	NELFE
ENSG00000204371	1363.44	-1.66861	0.127558	-13.0812	4.22e-39	2.12e-37	EHMT2
ENSG00000104783	1036.78	-1.66839	0.127975	-13.0368	7.55e-39	3.78e-37	KCNN4
ENSG00000171443	246.323	-1.66836	0.281133	-5.93441	2.95e-09	2.25e-08	ZNF524
ENSG00000169499	147.814	-1.66707	0.365056	-4.56661	4.96e-06	2.5e-05	PLEKHA2
ENSG00000185813	755.063	-1.66661	0.18625	-8.94822	3.61e-19	6.38e-18	PCYT2
ENSG00000164078	594.274	-1.66649	0.233035	-7.15126	8.6e-13	9.3e-12	MST1R
ENSG00000168067	734.45	-1.66589	0.184081	-9.04981	1.43e-19	2.59e-18	MAP4K2
ENSG00000100979	81.6012	-1.6646	0.450553	-3.69457	0.000220257	0.00084027	PLTP
ENSG00000125611	561.079	-1.66285	0.205032	-8.11018	5.05e-16	7.06e-15	CHCHD5
ENSG00000156253	302.268	-1.66241	0.233439	-7.1214	1.07e-12	1.15e-11	RWDD2B
ENSG00000250479	2603.94	-1.66055	0.12372	-13.4219	4.5e-41	2.54e-39	CHCHD10
ENSG00000133315	1343.57	-1.65949	0.137166	-12.0984	1.08e-33	4.26e-32	MACROD1
ENSG00000003400	60.5109	-1.65925	0.499372	-3.32267	0.000891589	0.00299054	CASP10
ENSG00000007376	1187.65	-1.6587	0.154602	-10.7288	7.45e-27	2.09e-25	RPUSD1
ENSG00000069535	457.738	-1.65699	0.238055	-6.96054	3.39e-12	3.48e-11	MAOB
ENSG00000178814	487.284	-1.65668	0.244942	-6.76354	1.35e-11	1.3e-10	OPLAH
ENSG00000080819	3248.29	-1.65589	0.103762	-15.9585	2.49e-57	2.31e-55	CPOX
ENSG00000164967	579.525	-1.65512	0.207295	-7.9844	1.41e-15	1.91e-14	RPP25L
ENSG00000187730	316.571	-1.6549	0.292081	-5.66591	1.46e-08	1.03e-07	GABRD
ENSG00000089351	1182.24	-1.65485	0.129438	-12.7849	1.99e-37	9.35e-36	GRAMD1A
ENSG00000169258	319.694	-1.65371	0.269959	-6.1258	9.02e-10	7.3e-09	GPRIN1
ENSG00000172828	86.1018	-1.65335	0.438372	-3.77156	0.000162228	0.000638633	CES3
ENSG00000006611	401.569	-1.64958	0.249665	-6.60718	3.92e-11	3.59e-10	USH1C
ENSG00000101190	286.454	-1.64871	0.267512	-6.16312	7.13e-10	5.83e-09	TCFL5
ENSG00000132541	397.09	-1.6484	0.244238	-6.74915	1.49e-11	1.43e-10	RIDA
ENSG00000142082	345.113	-1.64729	0.230217	-7.15539	8.34e-13	9.04e-12	SIRT3
ENSG00000066248	189.203	-1.64722	0.307991	-5.34829	8.88e-08	5.68e-07	NGEF
ENSG00000141696	503.675	-1.64597	0.185575	-8.8696	7.34e-19	1.26e-17	P3H4
ENSG00000166169	547.806	-1.6434	0.1801	-9.12493	7.18e-20	1.32e-18	POLL
ENSG00000136379	293.868	-1.6427	0.268594	-6.11593	9.6e-10	7.74e-09	ABHD17C
ENSG00000124574	270.578	-1.64248	0.253383	-6.4822	9.04e-11	8.02e-10	ABCC10
ENSG00000103202	939.184	-1.6396	0.144388	-11.3555	6.96e-30	2.29e-28	NME4
ENSG00000132405	98.3249	-1.63922	0.436735	-3.75336	0.00017448	0.000682453	TBC1D14
ENSG00000104691	147.357	-1.63903	0.32153	-5.0976	3.44e-07	2.04e-06	UBXN8
ENSG00000144824	923.42	-1.63287	0.175968	-9.27937	1.7e-20	3.33e-19	PHLDB2
ENSG00000142173	2500.61	-1.63201	0.0935072	-17.4533	3.25e-68	4.26e-66	COL6A2
ENSG00000154957	103.499	-1.63184	0.423688	-3.85151	0.00011739	0.000474891	ZNF18
ENSG00000167528	129.382	-1.63171	0.385925	-4.22805	2.36e-05	0.000107032	ZNF641
ENSG00000173894	439.925	-1.63116	0.219297	-7.43816	1.02e-13	1.2e-12	CBX2
ENSG00000130158	661.455	-1.62979	0.185497	-8.78609	1.55e-18	2.6e-17	DOCK6
ENSG00000151150	59.4505	-1.62894	0.515399	-3.16054	0.00157477	0.00499359	ANK3
ENSG00000012211	312.683	-1.62668	0.237789	-6.84083	7.87e-12	7.8e-11	PRICKLE3
ENSG00000131899	737.134	-1.6256	0.174871	-9.29599	1.46e-20	2.86e-19	LLGL1
ENSG00000037757	99.6261	-1.62353	0.494341	-3.28423	0.00102262	0.00338494	MRI1
ENSG00000171084	70.7815	-1.62243	0.482329	-3.36374	0.00076893	0.00262008	FAM86JP
ENSG00000185522	105.549	-1.62127	0.372331	-4.35439	1.33e-05	6.3e-05	LMNTD2
ENSG00000090447	487.653	-1.62124	0.185519	-8.73892	2.35e-18	3.9e-17	TFAP4
ENSG00000135587	173.917	-1.62102	0.295266	-5.49005	4.02e-08	2.67e-07	SMPD2
ENSG00000124593	91.0941	-1.62081	0.453166	-3.57664	0.000348036	0.00127816	AL365205.1
ENSG00000119333	2722.37	-1.61949	0.0929106	-17.4306	4.83e-68	6.25e-66	WDR34
ENSG00000111144	2556.29	-1.61838	0.114688	-14.1111	3.24e-45	2.13e-43	LTA4H
ENSG00000128394	74.4862	-1.61677	0.49349	-3.2762	0.00105213	0.00347167	APOBEC3F
ENSG00000161558	119.262	-1.61615	0.385057	-4.19718	2.7e-05	0.000121598	TMEM143
ENSG00000130768	297.954	-1.61587	0.242932	-6.65153	2.9e-11	2.7e-10	SMPDL3B
ENSG00000099364	774.876	-1.61532	0.17159	-9.41384	4.78e-21	9.65e-20	FBXL19
ENSG00000105639	122.936	-1.61512	0.469922	-3.43699	0.000588213	0.00205282	JAK3
ENSG00000130720	419.112	-1.61379	0.1913	-8.43591	3.29e-17	5.08e-16	FIBCD1
ENSG00000118762	122.8	-1.61257	0.447087	-3.60684	0.000309952	0.00114993	PKD2
ENSG00000169228	70.2775	-1.61178	0.48379	-3.33158	0.000863535	0.00290729	RAB24
ENSG00000114923	298.287	-1.61164	0.259843	-6.20237	5.56e-10	4.58e-09	SLC4A3
ENSG00000136807	1161.8	-1.60905	0.149001	-10.799	3.48e-27	1e-25	CDK9
ENSG00000131844	596.387	-1.60803	0.184833	-8.6999	3.32e-18	5.46e-17	MCCC2
ENSG00000168890	115.974	-1.60786	0.362384	-4.4369	9.13e-06	4.4e-05	TMEM150A
ENSG00000138496	154.682	-1.60739	0.336524	-4.77644	1.78e-06	9.62e-06	PARP9
ENSG00000135439	297.78	-1.60692	0.237726	-6.75955	1.38e-11	1.33e-10	AGAP2
ENSG00000068079	181.462	-1.60682	0.388675	-4.13408	3.56e-05	0.000157424	IFI35
ENSG00000167747	2667.27	-1.60631	0.121719	-13.1969	9.14e-40	4.74e-38	C19orf48
ENSG00000221829	715.791	-1.60601	0.181248	-8.86086	7.94e-19	1.36e-17	FANCG
ENSG00000166123	867.76	-1.6057	0.146164	-10.9856	4.48e-28	1.35e-26	GPT2
ENSG00000172053	3632.47	-1.60557	0.0937682	-17.1227	1e-65	1.22e-63	QARS
ENSG00000106683	1045.88	-1.6046	0.166838	-9.61773	6.73e-22	1.44e-20	LIMK1
ENSG00000053371	1271.32	-1.60426	0.127978	-12.5354	4.78e-36	2.11e-34	AKR7A2
ENSG00000240204	97.8506	-1.60337	0.461592	-3.47357	0.000513584	0.00181484	SMKR1
ENSG00000070669	6825.38	-1.60331	0.0749435	-21.3935	1.54e-101	4.53e-99	ASNS
ENSG00000138434	4790.95	-1.60218	0.0722253	-22.1831	5.01e-109	1.66e-106	ITPRID2
ENSG00000113108	162.764	-1.59963	0.385422	-4.15033	3.32e-05	0.000147618	APBB3
ENSG00000188677	424.994	-1.5983	0.190543	-8.3881	4.94e-17	7.5e-16	PARVB
ENSG00000100116	1144.97	-1.59805	0.156173	-10.2326	1.42e-24	3.47e-23	GCAT
ENSG00000164011	123.158	-1.59568	0.382046	-4.17667	2.96e-05	0.000132525	ZNF691
ENSG00000141971	1202.77	-1.59449	0.128902	-12.3698	3.81e-35	1.59e-33	MVB12A
ENSG00000065054	971.762	-1.59296	0.135596	-11.7478	7.25e-32	2.63e-30	SLC9A3R2
ENSG00000110455	88.4825	-1.59273	0.483313	-3.29544	0.000982694	0.00326711	ACCS
ENSG00000172500	1354.18	-1.59271	0.128246	-12.4192	2.06e-35	8.85e-34	FIBP
ENSG00000177674	568.938	-1.59214	0.203579	-7.82072	5.25e-15	6.82e-14	AGTRAP
ENSG00000130881	603.338	-1.58833	0.181715	-8.7408	2.31e-18	3.85e-17	LRP3
ENSG00000128050	4526.96	-1.58827	0.0944641	-16.8135	1.94e-63	2.2e-61	PAICS
ENSG00000069812	187.692	-1.58771	0.29405	-5.39947	6.68e-08	4.33e-07	HES2
ENSG00000221838	249.621	-1.58701	0.266692	-5.95073	2.67e-09	2.05e-08	AP4M1
ENSG00000112294	129.404	-1.58554	0.431543	-3.67412	0.000238672	0.000905036	ALDH5A1
ENSG00000105255	322.425	-1.58367	0.225511	-7.02256	2.18e-12	2.28e-11	FSD1
ENSG00000198755	19428.9	-1.58041	0.0626744	-25.2162	2.66e-140	1.52e-137	RPL10A
ENSG00000103152	299.6	-1.57994	0.246451	-6.41079	1.45e-10	1.26e-09	MPG
ENSG00000124191	581.872	-1.57878	0.174626	-9.04093	1.55e-19	2.8e-18	TOX2
ENSG00000129219	734.458	-1.5781	0.165548	-9.53256	1.53e-21	3.19e-20	PLD2
ENSG00000162600	155.705	-1.57722	0.373582	-4.22189	2.42e-05	0.000109764	OMA1
ENSG00000107902	818.619	-1.57478	0.157942	-9.9706	2.05e-23	4.74e-22	LHPP
ENSG00000184900	485.854	-1.57423	0.207382	-7.59097	3.18e-14	3.89e-13	SUMO3
ENSG00000124920	906.404	-1.57418	0.151013	-10.4242	1.92e-25	4.95e-24	MYRF
ENSG00000175575	194.531	-1.574	0.29499	-5.33579	9.51e-08	6.06e-07	PAAF1
ENSG00000157734	101.848	-1.5735	0.471353	-3.33827	0.00084302	0.00284634	SNX22
ENSG00000102882	1205.15	-1.57122	0.129462	-12.1365	6.77e-34	2.72e-32	MAPK3
ENSG00000272047	432.429	-1.56897	0.231742	-6.77031	1.29e-11	1.24e-10	GTF2H5
ENSG00000255874	114.754	-1.56819	0.371543	-4.22076	2.43e-05	0.000110233	LINC00346
ENSG00000232573	455.163	-1.56715	0.227854	-6.87785	6.08e-12	6.09e-11	RPL3P4
ENSG00000187535	453.405	-1.56504	0.197508	-7.92395	2.3e-15	3.07e-14	IFT140
ENSG00000157657	182.692	-1.5645	0.304042	-5.14568	2.67e-07	1.61e-06	ZNF618
ENSG00000142530	292.082	-1.56287	0.281643	-5.54912	2.87e-08	1.95e-07	FAM71E1
ENSG00000188372	187.265	-1.56202	0.312472	-4.99889	5.77e-07	3.32e-06	ZP3
ENSG00000162244	19281.5	-1.5609	0.0627647	-24.869	1.61e-136	8.01e-134	RPL29
ENSG00000130731	959.381	-1.5606	0.164959	-9.46054	3.06e-21	6.23e-20	METTL26
ENSG00000104518	1725.37	-1.56021	0.107624	-14.4968	1.27e-47	9.01e-46	GSDMD
ENSG00000103034	127.904	-1.55926	0.337431	-4.62098	3.82e-06	1.96e-05	NDRG4
ENSG00000027847	285.155	-1.55888	0.265093	-5.88053	4.09e-09	3.08e-08	B4GALT7
ENSG00000182180	967.829	-1.55875	0.14653	-10.6378	1.99e-26	5.49e-25	MRPS16
ENSG00000142156	1759.41	-1.55797	0.128027	-12.1691	4.54e-34	1.84e-32	COL6A1
ENSG00000136997	3638.61	-1.55726	0.122455	-12.717	4.76e-37	2.18e-35	MYC
ENSG00000167393	165.708	-1.5571	0.335397	-4.64256	3.44e-06	1.78e-05	PPP2R3B
ENSG00000164484	143.495	-1.55679	0.338393	-4.60053	4.21e-06	2.14e-05	TMEM200A
ENSG00000162676	77.8752	-1.55423	0.488941	-3.17877	0.00147903	0.0047171	GFI1
ENSG00000147813	2201.9	-1.55381	0.116213	-13.3704	9.01e-41	4.94e-39	NAPRT
ENSG00000090539	266.067	-1.55272	0.285348	-5.44151	5.28e-08	3.47e-07	CHRD
ENSG00000163040	139.153	-1.55271	0.370131	-4.19502	2.73e-05	0.000122704	CCDC74A
ENSG00000136425	300.718	-1.5519	0.276635	-5.60993	2.02e-08	1.4e-07	CIB2
ENSG00000100577	548.432	-1.55157	0.192804	-8.04739	8.46e-16	1.17e-14	GSTZ1
ENSG00000004660	214.103	-1.55046	0.303821	-5.10318	3.34e-07	1.99e-06	CAMKK1
ENSG00000127980	134.938	-1.54919	0.369548	-4.19213	2.76e-05	0.000124194	PEX1
ENSG00000213931	3000.44	-1.54735	0.0886871	-17.4473	3.61e-68	4.7e-66	HBE1
ENSG00000125843	119.756	-1.54644	0.415037	-3.72603	0.00019452	0.000752004	AP5S1
ENSG00000134146	141.947	-1.54385	0.386395	-3.99552	6.46e-05	0.000272408	DPH6
ENSG00000006015	905.908	-1.54242	0.143389	-10.757	5.5e-27	1.56e-25	REX1BD
ENSG00000168904	175.823	-1.54193	0.338288	-4.55805	5.16e-06	2.59e-05	LRRC28
ENSG00000139289	4946.39	-1.54135	0.0790896	-19.4887	1.37e-84	2.84e-82	PHLDA1
ENSG00000008323	363.99	-1.54038	0.245326	-6.2789	3.41e-10	2.87e-09	PLEKHG6
ENSG00000170846	430.055	-1.53961	0.255095	-6.03544	1.59e-09	1.24e-08	AC093323.1
ENSG00000215375	70.3254	-1.53911	0.468795	-3.28312	0.00102664	0.00339767	MYL5
ENSG00000128266	186.264	-1.53827	0.295262	-5.20986	1.89e-07	1.16e-06	GNAZ
ENSG00000138814	1442.06	-1.53721	0.131171	-11.7192	1.02e-31	3.65e-30	PPP3CA
ENSG00000203943	83.3878	-1.5368	0.451838	-3.40122	0.000670862	0.00231431	SAMD13
ENSG00000155363	1561.08	-1.53618	0.109485	-14.0309	1.01e-44	6.59e-43	MOV10
ENSG00000154059	316.279	-1.53515	0.245671	-6.24879	4.14e-10	3.45e-09	IMPACT
ENSG00000141349	719.42	-1.53502	0.158926	-9.65869	4.52e-22	9.73e-21	G6PC3
ENSG00000166578	83.1481	-1.53477	0.468957	-3.27273	0.00106513	0.00351213	IQCD
ENSG00000185386	422.925	-1.53379	0.269362	-5.69416	1.24e-08	8.83e-08	MAPK11
ENSG00000169710	6829.09	-1.53342	0.0866423	-17.6982	4.33e-70	6.19e-68	FASN
ENSG00000230202	66.266	-1.53323	0.463596	-3.30725	0.000942183	0.00314405	AL450405.1
ENSG00000167702	813.487	-1.53311	0.171648	-8.93172	4.19e-19	7.37e-18	KIFC2
ENSG00000100823	3649.3	-1.53288	0.0925473	-16.5632	1.29e-61	1.38e-59	APEX1
ENSG00000171604	744.002	-1.53183	0.148414	-10.3214	5.64e-25	1.43e-23	CXXC5
ENSG00000094914	1160.15	-1.53138	0.133478	-11.473	1.8e-30	6.12e-29	AAAS
ENSG00000104833	413.305	-1.53025	0.225507	-6.78581	1.15e-11	1.12e-10	TUBB4A
ENSG00000141376	278.732	-1.53014	0.282141	-5.42333	5.85e-08	3.82e-07	BCAS3
ENSG00000186222	246.263	-1.52538	0.31801	-4.79664	1.61e-06	8.75e-06	BLOC1S4
ENSG00000168887	209.399	-1.52477	0.297552	-5.12439	2.99e-07	1.79e-06	C2orf68
ENSG00000160867	1116.21	-1.52437	0.135118	-11.2817	1.62e-29	5.22e-28	FGFR4
ENSG00000127423	148.383	-1.523	0.420003	-3.62616	0.000287663	0.0010742	AUNIP
ENSG00000170382	109.12	-1.52275	0.414098	-3.67727	0.000235741	0.000894819	LRRN2
ENSG00000231789	212.236	-1.52255	0.262875	-5.7919	6.96e-09	5.1e-08	PIK3CD-AS2
ENSG00000162430	2262.39	-1.5219	0.0968144	-15.7198	1.11e-55	1.01e-53	SELENON
ENSG00000129038	258.464	-1.51913	0.309268	-4.91203	9.01e-07	5.07e-06	LOXL1
ENSG00000114631	182.547	-1.51785	0.34606	-4.38608	1.15e-05	5.5e-05	PODXL2
ENSG00000169093	1375.66	-1.51756	0.11665	-13.0095	1.08e-38	5.37e-37	ASMTL
ENSG00000198840	18844.3	-1.51662	0.198534	-7.63907	2.19e-14	2.71e-13	MT-ND3
ENSG00000169851	836.303	-1.51658	0.158221	-9.5852	9.23e-22	1.95e-20	PCDH7
ENSG00000146072	750.549	-1.51376	0.169543	-8.92844	4.32e-19	7.58e-18	TNFRSF21
ENSG00000169105	333.458	-1.51337	0.257833	-5.86959	4.37e-09	3.28e-08	CHST14
ENSG00000054598	914.968	-1.5131	0.158672	-9.53605	1.48e-21	3.09e-20	FOXC1
ENSG00000186918	483.605	-1.51269	0.233691	-6.47302	9.61e-11	8.5e-10	ZNF395
ENSG00000177679	369.313	-1.51254	0.214654	-7.0464	1.84e-12	1.93e-11	SRRM3
ENSG00000196663	189.791	-1.51218	0.294816	-5.12923	2.91e-07	1.75e-06	TECPR2
ENSG00000062282	103.16	-1.51155	0.42665	-3.54282	0.000395867	0.00143595	DGAT2
ENSG00000167674	2045.67	-1.51094	0.0990039	-15.2615	1.38e-52	1.12e-50	HDGFL2
ENSG00000053501	403.299	-1.51062	0.227593	-6.63737	3.19e-11	2.96e-10	USE1
ENSG00000196465	1200.47	-1.50723	0.141698	-10.6369	2.01e-26	5.53e-25	MYL6B
ENSG00000166897	974.065	-1.50693	0.154693	-9.74144	2.01e-22	4.41e-21	ELFN2
ENSG00000100196	534.467	-1.50402	0.189077	-7.95453	1.8e-15	2.41e-14	KDELR3
ENSG00000176410	105.571	-1.49859	0.41099	-3.64629	0.000266049	0.00100041	DNAJC30
ENSG00000129195	645.202	-1.49808	0.178767	-8.38008	5.29e-17	8.02e-16	PIMREG
ENSG00000106049	433.837	-1.4976	0.270376	-5.53897	3.04e-08	2.06e-07	HIBADH
ENSG00000092098	149.178	-1.49716	0.365197	-4.0996	4.14e-05	0.000181	RNF31
ENSG00000132635	435.722	-1.49659	0.194152	-7.70832	1.27e-14	1.6e-13	PCED1A
ENSG00000135482	108.479	-1.495	0.392956	-3.80449	0.000142099	0.000566477	ZC3H10
ENSG00000119574	250.544	-1.49496	0.298897	-5.0016	5.69e-07	3.28e-06	ZBTB45
ENSG00000213445	1404.81	-1.4943	0.123739	-12.0762	1.41e-33	5.56e-32	SIPA1
ENSG00000099904	749.185	-1.49342	0.172398	-8.66267	4.61e-18	7.52e-17	ZDHHC8
ENSG00000105404	876.576	-1.49154	0.171791	-8.68231	3.88e-18	6.35e-17	RABAC1
ENSG00000227097	3325.36	-1.49113	0.0802472	-18.5817	4.52e-77	8.28e-75	RPS28P7
ENSG00000185347	606.472	-1.48994	0.185318	-8.03988	8.99e-16	1.24e-14	TEDC1
ENSG00000149150	118.634	-1.48964	0.399787	-3.72609	0.000194476	0.000752004	SLC43A1
ENSG00000174989	132.637	-1.48893	0.344845	-4.31768	1.58e-05	7.35e-05	FBXW8	HNRNPA2B1
ENSG00000117411	1510.88	-1.48871	0.140533	-10.5934	3.2e-26	8.7e-25	B4GALT2
ENSG00000144579	1179.36	-1.48834	0.156498	-9.51028	1.9e-21	3.92e-20	CTDSP1
ENSG00000109084	531.819	-1.48788	0.185092	-8.03862	9.09e-16	1.25e-14	TMEM97
ENSG00000167513	2869.99	-1.48619	0.0904019	-16.4398	9.93e-61	1.04e-58	CDT1
ENSG00000174917	802.058	-1.48486	0.161774	-9.17858	4.37e-20	8.25e-19	MICOS13
ENSG00000160993	253.458	-1.48471	0.274879	-5.40132	6.62e-08	4.29e-07	ALKBH4
ENSG00000160298	88.0741	-1.48451	0.433849	-3.42171	0.000622277	0.00215933	C21orf58
ENSG00000129158	325.58	-1.48347	0.246529	-6.0174	1.77e-09	1.38e-08	SERGEF
ENSG00000156384	263.66	-1.48144	0.269034	-5.50651	3.66e-08	2.45e-07	SFR1
ENSG00000143314	1501.37	-1.47914	0.133592	-11.0721	1.71e-28	5.26e-27	MRPL24
ENSG00000139428	281.378	-1.47913	0.306672	-4.82316	1.41e-06	7.71e-06	MMAB
ENSG00000140939	600.252	-1.47776	0.181483	-8.14272	3.86e-16	5.46e-15	NOL3
ENSG00000167549	128.966	-1.47763	0.378071	-3.90834	9.29e-05	0.000382674	CORO6
ENSG00000184207	818.945	-1.47719	0.168831	-8.74948	2.14e-18	3.57e-17	PGP
ENSG00000198938	97437.8	-1.4769	0.163202	-9.04951	1.44e-19	2.59e-18	MT-CO3
ENSG00000147364	231.838	-1.4768	0.269073	-5.48848	4.05e-08	2.7e-07	FBXO25
ENSG00000246089	88.0773	-1.47599	0.456015	-3.23672	0.00120914	0.00394291	AC016065.1
ENSG00000184292	119.779	-1.47555	0.399206	-3.69621	0.000218844	0.000835553	TACSTD2
ENSG00000196151	106.162	-1.47544	0.4215	-3.50045	0.000464482	0.0016584	WDSUB1
ENSG00000162062	326.503	-1.47309	0.241893	-6.08984	1.13e-09	9.03e-09	TEDC2
ENSG00000125457	429.47	-1.47302	0.224929	-6.5488	5.8e-11	5.24e-10	MIF4GD
ENSG00000260822	143.48	-1.47258	0.360238	-4.08779	4.36e-05	0.000189628	#N/A
ENSG00000184939	176.749	-1.47205	0.295978	-4.97351	6.58e-07	3.76e-06	ZFP90
ENSG00000165929	106.937	-1.47106	0.412917	-3.56259	0.000367208	0.00134387	TC2N
ENSG00000125458	974.083	-1.47052	0.141961	-10.3587	3.82e-25	9.74e-24	NT5C
ENSG00000100982	621.775	-1.47052	0.180753	-8.13552	4.1e-16	5.78e-15	PCIF1
ENSG00000174672	274.958	-1.47028	0.26342	-5.58148	2.38e-08	1.64e-07	BRSK2
ENSG00000221955	224.899	-1.46969	0.286738	-5.12554	2.97e-07	1.78e-06	SLC12A8
ENSG00000132600	379.303	-1.46927	0.22741	-6.46088	1.04e-10	9.19e-10	PRMT7
ENSG00000181192	296.666	-1.46906	0.293004	-5.0138	5.34e-07	3.09e-06	DHTKD1
ENSG00000085831	237.813	-1.46787	0.305741	-4.80101	1.58e-06	8.56e-06	TTC39A
ENSG00000182742	316.742	-1.46694	0.244097	-6.00966	1.86e-09	1.45e-08	HOXB4
ENSG00000117016	175.625	-1.4653	0.31702	-4.62209	3.8e-06	1.95e-05	RIMS3
ENSG00000116128	288.055	-1.46356	0.270013	-5.42035	5.95e-08	3.89e-07	BCL9
ENSG00000213420	70.0743	-1.46335	0.459695	-3.1833	0.00145605	0.00465325	GPC2
ENSG00000141858	1107.86	-1.46239	0.125303	-11.6709	1.8e-31	6.39e-30	SAMD1
ENSG00000185252	239.517	-1.46167	0.282213	-5.17931	2.23e-07	1.36e-06	ZNF74
ENSG00000175130	2846.42	-1.46139	0.0973258	-15.0154	5.82e-51	4.52e-49	MARCKSL1
ENSG00000168286	403.794	-1.46133	0.215101	-6.79371	1.09e-11	1.07e-10	THAP11
ENSG00000128604	264.224	-1.45967	0.25296	-5.77038	7.91e-09	5.77e-08	IRF5
ENSG00000185133	182.012	-1.45946	0.347092	-4.20482	2.61e-05	0.000117844	INPP5J
ENSG00000100055	77.6358	-1.45919	0.455478	-3.20365	0.00135699	0.00436995	CYTH4
ENSG00000176720	636.516	-1.45905	0.186219	-7.83509	4.68e-15	6.11e-14	BOK
ENSG00000204576	199.254	-1.45815	0.289468	-5.03733	4.72e-07	2.76e-06	PRR3
ENSG00000148180	2018.11	-1.45759	0.113902	-12.7969	1.71e-37	8.06e-36	GSN
ENSG00000143434	133.18	-1.45699	0.362571	-4.01849	5.86e-05	0.000249066	SEMA6C
ENSG00000181085	454.007	-1.45688	0.191532	-7.60646	2.82e-14	3.46e-13	MAPK15
ENSG00000112365	126.647	-1.45617	0.449173	-3.2419	0.00118738	0.0038773	ZBTB24
ENSG00000180155	99.2607	-1.45467	0.390736	-3.7229	0.000196944	0.000760706	LYNX1
ENSG00000116661	2819.9	-1.45282	0.113557	-12.7938	1.78e-37	8.36e-36	FBXO2
ENSG00000148700	253.922	-1.45249	0.257566	-5.63929	1.71e-08	1.2e-07	ADD3
ENSG00000176884	319.294	-1.45168	0.239751	-6.05495	1.4e-09	1.11e-08	GRIN1
ENSG00000157833	253.464	-1.45159	0.271422	-5.34811	8.89e-08	5.68e-07	GAREM2
ENSG00000115661	495.022	-1.45096	0.185708	-7.81309	5.58e-15	7.23e-14	STK16
ENSG00000186615	91.3145	-1.44967	0.433824	-3.3416	0.00083298	0.00281496	KTN1-AS1
ENSG00000007541	198.346	-1.44642	0.286145	-5.05483	4.31e-07	2.53e-06	PIGQ
ENSG00000117480	386.812	-1.44579	0.221659	-6.52259	6.91e-11	6.21e-10	FAAH
ENSG00000173638	503.99	-1.44441	0.191564	-7.54008	4.7e-14	5.67e-13	SLC19A1
ENSG00000092096	157.839	-1.44298	0.373049	-3.86806	0.000109703	0.000446183	SLC22A17
ENSG00000142303	92.1104	-1.44294	0.411204	-3.50905	0.000449715	0.00161086	ADAMTS10
ENSG00000197956	23273.4	-1.44152	0.0807342	-17.8551	2.64e-71	3.89e-69	S100A6
ENSG00000213442	249.827	-1.44065	0.260126	-5.5383	3.05e-08	2.07e-07	RPL18AP3
ENSG00000161714	1436.56	-1.44063	0.125729	-11.4582	2.14e-30	7.24e-29	PLCD3
ENSG00000126602	2682.33	-1.43955	0.106277	-13.5453	8.45e-42	5.03e-40	TRAP1
ENSG00000177000	146.6	-1.43889	0.402073	-3.57868	0.000345338	0.00126947	MTHFR
ENSG00000164808	434.517	-1.43824	0.194675	-7.38788	1.49e-13	1.72e-12	SPIDR
ENSG00000111731	177.784	-1.43652	0.317427	-4.52551	6.02e-06	2.99e-05	C2CD5
ENSG00000134222	512.782	-1.43503	0.200378	-7.16161	7.97e-13	8.66e-12	PSRC1
ENSG00000115694	1702.34	-1.43459	0.117382	-12.2215	2.39e-34	9.73e-33	STK25
ENSG00000126878	815.332	-1.43418	0.147559	-9.71939	2.49e-22	5.46e-21	AIF1L
ENSG00000132481	1126.01	-1.4325	0.131488	-10.8945	1.22e-27	3.59e-26	TRIM47
ENSG00000101255	2224.32	-1.43182	0.15569	-9.19662	3.69e-20	7.02e-19	TRIB3
ENSG00000099810	1656.66	-1.42976	0.160957	-8.88292	6.51e-19	1.13e-17	MTAP
ENSG00000182810	267.044	-1.42917	0.266362	-5.3655	8.07e-08	5.19e-07	DDX28
ENSG00000103150	162.879	-1.42735	0.34284	-4.1633	3.14e-05	0.000139968	MLYCD
ENSG00000215012	285.194	-1.42726	0.230564	-6.1903	6.01e-10	4.93e-09	RTL10
ENSG00000115648	776.165	-1.42665	0.15376	-9.27844	1.72e-20	3.36e-19	MLPH
ENSG00000167315	286.605	-1.42553	0.271124	-5.25786	1.46e-07	9.06e-07	ACAA2
ENSG00000116396	131.483	-1.42489	0.364915	-3.90471	9.43e-05	0.000387782	KCNC4
ENSG00000124006	468.331	-1.42472	0.210347	-6.77319	1.26e-11	1.22e-10	OBSL1
ENSG00000254726	139.963	-1.42463	0.357692	-3.98285	6.81e-05	0.000286648	MEX3A
ENSG00000089220	4598.86	-1.42428	0.0739807	-19.2521	1.36e-82	2.69e-80	PEBP1
ENSG00000166289	120.096	-1.42405	0.42903	-3.31924	0.000902636	0.00302277	PLEKHF1
ENSG00000068354	211.082	-1.42393	0.315518	-4.513	6.39e-06	3.16e-05	TBC1D25
ENSG00000121057	654.351	-1.42349	0.215435	-6.6075	3.91e-11	3.59e-10	AKAP1
ENSG00000161395	197.612	-1.42156	0.292089	-4.86686	1.13e-06	6.28e-06	PGAP3
ENSG00000196684	366.923	-1.42014	0.247186	-5.74522	9.18e-09	6.65e-08	HSH2D
ENSG00000117543	459.185	-1.41965	0.188669	-7.52454	5.29e-14	6.37e-13	DPH5
ENSG00000187017	1300.4	-1.41925	0.125253	-11.331	9.21e-30	3.01e-28	ESPN
ENSG00000174564	97.1145	-1.41896	0.418916	-3.38723	0.000706023	0.00242233	IL20RB
ENSG00000068831	236.704	-1.41873	0.308344	-4.60115	4.2e-06	2.14e-05	RASGRP2
ENSG00000124243	492.079	-1.41787	0.203635	-6.96281	3.34e-12	3.43e-11	BCAS4
ENSG00000092964	234.763	-1.41768	0.314108	-4.51334	6.38e-06	3.16e-05	DPYSL2
ENSG00000173715	153.417	-1.41729	0.428873	-3.30467	0.000950875	0.00317081	C11orf80
ENSG00000198648	1561.08	-1.41688	0.154642	-9.1623	5.08e-20	9.54e-19	STK39
ENSG00000072135	564.854	-1.41634	0.173363	-8.16977	3.09e-16	4.4e-15	PTPN18
ENSG00000121691	769.349	-1.41586	0.157921	-8.96561	3.09e-19	5.48e-18	CAT
ENSG00000105701	6705.69	-1.4156	0.0861539	-16.4311	1.15e-60	1.19e-58	FKBP8
ENSG00000103254	559.885	-1.4149	0.176786	-8.00345	1.21e-15	1.65e-14	ANTKMT
ENSG00000103067	552.357	-1.41423	0.209736	-6.7429	1.55e-11	1.49e-10	ESRP2
ENSG00000134463	274.882	-1.41397	0.291334	-4.85341	1.21e-06	6.69e-06	ECHDC3
ENSG00000106477	101.303	-1.41325	0.399176	-3.54043	0.000399482	0.00144711	CEP41
ENSG00000130529	540.583	-1.41295	0.172717	-8.18072	2.82e-16	4.03e-15	TRPM4
ENSG00000152147	301.792	-1.41279	0.29705	-4.75607	1.97e-06	1.06e-05	GEMIN6
ENSG00000128805	188.918	-1.41192	0.278703	-5.06604	4.06e-07	2.39e-06	ARHGAP22
ENSG00000196642	978.162	-1.41047	0.156564	-9.0089	2.08e-19	3.72e-18	RABL6
ENSG00000142541	60440.8	-1.40911	0.0758585	-18.5755	5.07e-77	9.21e-75	RPL13A
ENSG00000176182	203.32	-1.40666	0.284433	-4.9455	7.59e-07	4.31e-06	MYPOP
ENSG00000143373	599.324	-1.40575	0.167548	-8.39015	4.86e-17	7.38e-16	ZNF687
ENSG00000170439	175.253	-1.40328	0.368749	-3.80552	0.000141508	0.000564583	METTL7B
ENSG00000129911	1038.28	-1.40207	0.142066	-9.86914	5.66e-23	1.29e-21	KLF16
ENSG00000153885	304.445	-1.40196	0.250919	-5.58732	2.31e-08	1.59e-07	KCTD15
ENSG00000010626	186.086	-1.40195	0.357364	-3.92303	8.74e-05	0.000361638	LRRC23
ENSG00000163346	386.544	-1.40185	0.2104	-6.66277	2.69e-11	2.51e-10	PBXIP1
ENSG00000119950	549.339	-1.40155	0.175484	-7.98673	1.39e-15	1.88e-14	MXI1
ENSG00000118898	933.179	-1.40141	0.147854	-9.47829	2.58e-21	5.28e-20	PPL
ENSG00000168159	2591.9	-1.40062	0.113014	-12.3934	2.84e-35	1.21e-33	RNF187
ENSG00000144730	155.363	-1.39947	0.32578	-4.29576	1.74e-05	8.06e-05	IL17RD
ENSG00000156795	318.33	-1.39704	0.219178	-6.37399	1.84e-10	1.59e-09	WDYHV1
ENSG00000140263	710.765	-1.39572	0.161854	-8.62333	6.5e-18	1.05e-16	SORD
ENSG00000171680	502.705	-1.3953	0.195819	-7.12544	1.04e-12	1.12e-11	PLEKHG5
ENSG00000196155	300.349	-1.39498	0.280253	-4.97757	6.44e-07	3.68e-06	PLEKHG4
ENSG00000143891	284.76	-1.39441	0.250569	-5.56498	2.62e-08	1.79e-07	GALM
ENSG00000126005	636.883	-1.39303	0.180413	-7.72133	1.15e-14	1.46e-13	MMP24OS
ENSG00000044090	716.702	-1.39302	0.185882	-7.49412	6.67e-14	7.97e-13	CUL7
ENSG00000116151	135.054	-1.38896	0.405366	-3.42643	0.000611562	0.00212723	MORN1
ENSG00000164237	971.349	-1.38644	0.14485	-9.57152	1.05e-21	2.22e-20	CMBL
ENSG00000161267	354.4	-1.38581	0.235167	-5.89288	3.8e-09	2.87e-08	BDH1
ENSG00000182621	95.7548	-1.38518	0.402576	-3.44081	0.000579984	0.0020286	PLCB1
ENSG00000133466	187.652	-1.38445	0.34443	-4.01953	5.83e-05	0.000248197	C1QTNF6
ENSG00000140943	2042.81	-1.3837	0.116079	-11.9203	9.28e-33	3.54e-31	MBTPS1
ENSG00000105223	2552.54	-1.38213	0.119878	-11.5295	9.37e-31	3.23e-29	PLD3
ENSG00000109654	224.143	-1.38164	0.351099	-3.9352	8.31e-05	0.000344932	TRIM2
ENSG00000167535	358.287	-1.3813	0.253281	-5.45362	4.94e-08	3.25e-07	CACNB3
ENSG00000105048	4246.15	-1.38103	0.0964701	-14.3156	1.75e-46	1.2e-44	TNNT1
ENSG00000159658	481.835	-1.38079	0.178775	-7.72359	1.13e-14	1.43e-13	EFCAB14
ENSG00000167632	645.251	-1.37915	0.176632	-7.80804	5.81e-15	7.51e-14	TRAPPC9
ENSG00000159267	228.487	-1.37729	0.290312	-4.74419	2.09e-06	1.12e-05	HLCS
ENSG00000157214	161.585	-1.37692	0.433017	-3.17982	0.00147366	0.00470238	STEAP2
ENSG00000004975	840.906	-1.37452	0.167816	-8.19062	2.6e-16	3.73e-15	DVL2
ENSG00000162384	568.213	-1.3743	0.176742	-7.77574	7.5e-15	9.63e-14	CZIB
ENSG00000162437	368.44	-1.37153	0.225237	-6.08929	1.13e-09	9.06e-09	RAVER2
ENSG00000085998	1296.33	-1.36896	0.123025	-11.1275	9.22e-29	2.89e-27	POMGNT1
ENSG00000240857	193.406	-1.36858	0.274749	-4.98119	6.32e-07	3.62e-06	RDH14
ENSG00000108389	505.036	-1.36831	0.258906	-5.28497	1.26e-07	7.87e-07	MTMR4
ENSG00000132026	276.268	-1.36818	0.304904	-4.48723	7.22e-06	3.54e-05	RTBDN
ENSG00000236104	263.544	-1.36454	0.246686	-5.53149	3.18e-08	2.14e-07	ZBTB22
ENSG00000174705	459.167	-1.36437	0.242761	-5.62021	1.91e-08	1.33e-07	SH3PXD2B
ENSG00000259956	969.349	-1.36307	0.17015	-8.01102	1.14e-15	1.55e-14	RBM15B
ENSG00000125846	155.448	-1.35968	0.392405	-3.46499	0.000530252	0.00187059	ZNF133
ENSG00000198892	187.981	-1.35922	0.291558	-4.66191	3.13e-06	1.63e-05	SHISA4
ENSG00000092758	575.474	-1.3592	0.217602	-6.24626	4.2e-10	3.5e-09	COL9A3
ENSG00000186907	370.624	-1.35852	0.226064	-6.00947	1.86e-09	1.45e-08	RTN4RL2
ENSG00000163597	884.579	-1.35797	0.143861	-9.43948	3.75e-21	7.61e-20	SNHG16
ENSG00000184060	147.534	-1.35746	0.345297	-3.93129	8.45e-05	0.000350365	ADAP2
ENSG00000160271	632.862	-1.35707	0.169714	-7.99621	1.28e-15	1.74e-14	RALGDS
ENSG00000158793	614.714	-1.35671	0.194572	-6.97278	3.11e-12	3.21e-11	NIT1
ENSG00000074071	2837.02	-1.35617	0.100911	-13.4393	3.56e-41	2.03e-39	MRPS34
ENSG00000262001	210.615	-1.35431	0.367696	-3.68323	0.000230297	0.000876446	DLGAP1-AS2
ENSG00000065268	1861.9	-1.35163	0.119098	-11.3489	7.51e-30	2.47e-28	WDR18
ENSG00000039068	660.508	-1.3515	0.188482	-7.17043	7.48e-13	8.13e-12	CDH1
ENSG00000131653	2248.71	-1.34969	0.100743	-13.3974	6.26e-41	3.49e-39	TRAF7
ENSG00000146733	399.52	-1.34896	0.244243	-5.52302	3.33e-08	2.24e-07	PSPH
ENSG00000183828	536.502	-1.34862	0.179251	-7.52364	5.33e-14	6.41e-13	NUDT14
ENSG00000104522	2008.94	-1.34796	0.11632	-11.5884	4.72e-31	1.64e-29	TSTA3
ENSG00000105655	5068.13	-1.3478	0.0860998	-15.6539	3.12e-55	2.74e-53	ISYNA1
ENSG00000146904	469.836	-1.34556	0.233838	-5.75425	8.7e-09	6.32e-08	EPHA1
ENSG00000172661	204.142	-1.3453	0.279242	-4.81769	1.45e-06	7.91e-06	WASHC2C
ENSG00000151692	158.309	-1.34516	0.327294	-4.10994	3.96e-05	0.000173518	RNF144A
ENSG00000135686	678.447	-1.3449	0.152007	-8.84762	8.94e-19	1.52e-17	KLHL36
ENSG00000099849	585.042	-1.34479	0.210099	-6.40076	1.55e-10	1.34e-09	RASSF7
ENSG00000173269	91.076	-1.34408	0.407804	-3.29589	0.00098109	0.00326293	MMRN2
ENSG00000124104	98.3403	-1.34382	0.404762	-3.32002	0.000900125	0.0030162	SNX21
ENSG00000196305	3163.3	-1.34335	0.096532	-13.9161	5.06e-44	3.25e-42	IARS
ENSG00000175643	238.509	-1.34143	0.264882	-5.06424	4.1e-07	2.41e-06	RMI2
ENSG00000163975	910.041	-1.33826	0.181898	-7.35719	1.88e-13	2.15e-12	MELTF
ENSG00000074370	509.476	-1.33709	0.212051	-6.30549	2.87e-10	2.43e-09	ATP2A3
ENSG00000160392	219.2	-1.3368	0.273342	-4.89058	1.01e-06	5.61e-06	C19orf47
ENSG00000156011	209.134	-1.33624	0.339793	-3.93252	8.41e-05	0.00034865	PSD3
ENSG00000148680	266.964	-1.3358	0.296801	-4.50067	6.77e-06	3.34e-05	HTR7
ENSG00000162522	1073.28	-1.33532	0.123499	-10.8124	3.01e-27	8.65e-26	KIAA1522
ENSG00000101104	461.111	-1.33453	0.219738	-6.07328	1.25e-09	9.94e-09	PABPC1L
ENSG00000117318	2295.97	-1.33441	0.110674	-12.0571	1.78e-33	6.94e-32	ID3
ENSG00000250920	435.104	-1.33358	0.209752	-6.35788	2.05e-10	1.76e-09	AC105460.1
ENSG00000198911	2320.08	-1.3324	0.104249	-12.781	2.09e-37	9.79e-36	SREBF2
ENSG00000132763	208.937	-1.33206	0.412977	-3.2255	0.00125755	0.00408174	MMACHC
ENSG00000197043	1932.53	-1.33133	0.110267	-12.0736	1.46e-33	5.73e-32	ANXA6
ENSG00000157212	208.957	-1.32891	0.313015	-4.24551	2.18e-05	9.94e-05	PAXIP1
ENSG00000158109	742.361	-1.3287	0.16603	-8.00279	1.22e-15	1.66e-14	TPRG1L
ENSG00000137124	836.804	-1.32784	0.161452	-8.22437	1.96e-16	2.85e-15	ALDH1B1
ENSG00000115325	322.918	-1.32664	0.224565	-5.90757	3.47e-09	2.63e-08	DOK1
ENSG00000101955	321.804	-1.32425	0.240077	-5.51591	3.47e-08	2.33e-07	SRPX
ENSG00000116096	1293.7	-1.32348	0.118319	-11.1857	4.79e-29	1.52e-27	SPR
ENSG00000106009	1483.18	-1.32332	0.155323	-8.51975	1.6e-17	2.54e-16	BRAT1
ENSG00000154743	167.322	-1.32324	0.353806	-3.74002	0.000184008	0.00071498	TSEN2
ENSG00000169884	163.206	-1.32313	0.396985	-3.33295	0.000859309	0.00289513	WNT10B
ENSG00000111358	639.174	-1.3231	0.246207	-5.37392	7.7e-08	4.96e-07	GTF2H3
ENSG00000142733	402.854	-1.3227	0.246717	-5.36119	8.27e-08	5.31e-07	MAP3K6
ENSG00000181284	219.126	-1.32268	0.266411	-4.96481	6.88e-07	3.92e-06	TMEM102
ENSG00000160410	1602.32	-1.32261	0.120592	-10.9676	5.47e-28	1.63e-26	SHKBP1
ENSG00000161920	195.512	-1.32123	0.320532	-4.122	3.76e-05	0.000165374	MED11
ENSG00000198804	101381	-1.32038	0.181008	-7.29458	3e-13	3.39e-12	MT-CO1
ENSG00000180096	123.293	-1.31949	0.385617	-3.42177	0.000622148	0.00215928	SEPTIN1
ENSG00000100380	3744.13	-1.31915	0.0852162	-15.48	4.74e-54	4.01e-52	ST13
ENSG00000101400	340.594	-1.31683	0.278272	-4.73217	2.22e-06	1.18e-05	SNTA1
ENSG00000139800	168.276	-1.31682	0.317709	-4.14474	3.4e-05	0.000151017	ZIC5
ENSG00000149932	928.779	-1.31636	0.144177	-9.13018	6.84e-20	1.27e-18	TMEM219
ENSG00000076248	1450.1	-1.31621	0.125502	-10.4875	9.86e-26	2.6e-24	UNG
ENSG00000277972	702.049	-1.31601	0.194786	-6.7562	1.42e-11	1.36e-10	CISD3
ENSG00000233927	13545.2	-1.31518	0.0743486	-17.6894	5.06e-70	7.19e-68	RPS28
ENSG00000184363	2548.96	-1.31396	0.113295	-11.5977	4.23e-31	1.47e-29	PKP3
ENSG00000130762	803.333	-1.31348	0.150193	-8.74529	2.22e-18	3.7e-17	ARHGEF16
ENSG00000149260	248.851	-1.31183	0.26208	-5.00545	5.57e-07	3.21e-06	CAPN5
ENSG00000107719	826.831	-1.31134	0.15987	-8.20254	2.35e-16	3.39e-15	PALD1
ENSG00000168268	2076.99	-1.31023	0.0976839	-13.4129	5.08e-41	2.85e-39	NT5DC2
ENSG00000163344	781.245	-1.31016	0.175597	-7.46118	8.57e-14	1.01e-12	PMVK
ENSG00000232445	167.936	-1.30988	0.359638	-3.64222	0.000270299	0.00101478	AC006329.1
ENSG00000105607	325.101	-1.30979	0.229045	-5.71848	1.07e-08	7.72e-08	GCDH
ENSG00000184575	1050.89	-1.30891	0.126872	-10.3168	5.92e-25	1.49e-23	XPOT
ENSG00000172340	585.792	-1.30858	0.17417	-7.51324	5.77e-14	6.92e-13	SUCLG2
ENSG00000101546	513.264	-1.30792	0.204802	-6.38628	1.7e-10	1.47e-09	RBFA
ENSG00000138363	1759.98	-1.30528	0.104125	-12.5358	4.76e-36	2.11e-34	ATIC
ENSG00000159753	431.582	-1.30425	0.254756	-5.1196	3.06e-07	1.83e-06	CARMIL2
ENSG00000197157	3004.31	-1.30363	0.0879027	-14.8304	9.31e-50	7.03e-48	SND1
ENSG00000205922	750.134	-1.30349	0.168867	-7.71908	1.17e-14	1.48e-13	ONECUT3
ENSG00000155660	4234.86	-1.30237	0.0788394	-16.5193	2.66e-61	2.83e-59	PDIA4
ENSG00000130560	986.49	-1.30214	0.15127	-8.60806	7.43e-18	1.19e-16	UBAC1
ENSG00000064547	445.475	-1.30142	0.23132	-5.62603	1.84e-08	1.29e-07	LPAR2
ENSG00000243477	138.529	-1.30126	0.350902	-3.70831	0.000208643	0.000800492	NAA80
ENSG00000196557	762.763	-1.3012	0.154372	-8.42903	3.49e-17	5.38e-16	CACNA1H
ENSG00000152556	2054.66	-1.3007	0.0983586	-13.224	6.37e-40	3.34e-38	PFKM
ENSG00000125746	1859.66	-1.30059	0.136426	-9.53325	1.52e-21	3.17e-20	EML2
ENSG00000142784	873.909	-1.2975	0.179013	-7.24806	4.23e-13	4.71e-12	WDTC1
ENSG00000198551	160.194	-1.29748	0.335608	-3.86605	0.000110614	0.000449404	ZNF627
ENSG00000168061	709.187	-1.2962	0.172468	-7.51561	5.66e-14	6.8e-13	SAC3D1
ENSG00000181418	135.228	-1.29615	0.33041	-3.92287	8.75e-05	0.000361729	DDN
ENSG00000162341	135.628	-1.29521	0.382693	-3.38446	0.00071319	0.00244515	TPCN2
ENSG00000108852	288.463	-1.29512	0.254674	-5.08541	3.67e-07	2.17e-06	MPP2
ENSG00000175745	1151.07	-1.29421	0.145727	-8.88111	6.62e-19	1.14e-17	NR2F1
ENSG00000126351	498.787	-1.29359	0.179279	-7.21547	5.37e-13	5.94e-12	THRA
ENSG00000146416	616.734	-1.29226	0.184843	-6.99115	2.73e-12	2.83e-11	AIG1
ENSG00000104413	1275.87	-1.29182	0.126653	-10.1996	1.99e-24	4.84e-23	ESRP1
ENSG00000135446	1523.57	-1.29176	0.133091	-9.70584	2.85e-22	6.2e-21	CDK4
ENSG00000116353	617.399	-1.29132	0.160498	-8.04571	8.57e-16	1.19e-14	MECR
ENSG00000108469	511.441	-1.28917	0.210576	-6.12213	9.23e-10	7.46e-09	RECQL5
ENSG00000108375	856.438	-1.28723	0.146524	-8.78514	1.56e-18	2.62e-17	RNF43
ENSG00000169925	230.546	-1.28651	0.284714	-4.5186	6.22e-06	3.09e-05	BRD3
ENSG00000165152	333.381	-1.28612	0.213949	-6.01132	1.84e-09	1.43e-08	TMEM246
ENSG00000035687	414.275	-1.2857	0.214832	-5.98466	2.17e-09	1.68e-08	ADSS
ENSG00000039650	746.457	-1.28561	0.144953	-8.86916	7.37e-19	1.27e-17	PNKP
ENSG00000163382	2100.81	-1.28557	0.122995	-10.4522	1.43e-25	3.71e-24	NAXE
ENSG00000185686	721.065	-1.28542	0.185194	-6.94096	3.89e-12	3.97e-11	PRAME
ENSG00000173992	655.822	-1.28518	0.169755	-7.5708	3.71e-14	4.52e-13	CCS
ENSG00000139370	192.804	-1.28367	0.311178	-4.12521	3.7e-05	0.000163309	SLC15A4
ENSG00000141756	1169.39	-1.2823	0.13537	-9.4726	2.73e-21	5.57e-20	FKBP10
ENSG00000169371	195.168	-1.2821	0.311124	-4.12085	3.77e-05	0.000166084	SNUPN
ENSG00000126814	300.375	-1.27909	0.22983	-5.56538	2.62e-08	1.79e-07	TRMT5
ENSG00000110492	5923.22	-1.27874	0.079989	-15.9865	1.59e-57	1.49e-55	MDK
ENSG00000256235	628.966	-1.2776	0.166251	-7.68475	1.53e-14	1.92e-13	SMIM3
ENSG00000135406	103.757	-1.27693	0.402384	-3.17342	0.00150656	0.00479358	PRPH
ENSG00000133835	994.142	-1.27631	0.149934	-8.51252	1.7e-17	2.69e-16	HSD17B4
ENSG00000105427	211.997	-1.27627	0.296196	-4.30886	1.64e-05	7.62e-05	CNFN
ENSG00000059691	479.164	-1.27592	0.217878	-5.85609	4.74e-09	3.53e-08	GATB
ENSG00000074201	1568.87	-1.27562	0.120417	-10.5934	3.2e-26	8.7e-25	CLNS1A
ENSG00000183762	685.386	-1.27482	0.161014	-7.9174	2.43e-15	3.23e-14	KREMEN1
ENSG00000242612	205.649	-1.27424	0.270801	-4.70546	2.53e-06	1.33e-05	DECR2
ENSG00000076864	367.963	-1.274	0.205059	-6.21281	5.2e-10	4.29e-09	RAP1GAP
ENSG00000187720	309.224	-1.27083	0.230832	-5.50543	3.68e-08	2.46e-07	THSD4
ENSG00000167771	185.96	-1.26998	0.310201	-4.09406	4.24e-05	0.000185121	RCOR2
ENSG00000164087	552.409	-1.26883	0.195864	-6.47814	9.29e-11	8.23e-10	POC1A
ENSG00000179958	1328.23	-1.26871	0.142978	-8.87347	7.09e-19	1.22e-17	DCTPP1
ENSG00000179981	116.666	-1.2678	0.366962	-3.45485	0.000550589	0.00193605	TSHZ1
ENSG00000118816	2225.14	-1.26682	0.102244	-12.3901	2.96e-35	1.26e-33	CCNI
ENSG00000255248	486.628	-1.26665	0.200388	-6.32101	2.6e-10	2.21e-09	MIR100HG
ENSG00000044446	297.078	-1.26531	0.274908	-4.60267	4.17e-06	2.12e-05	PHKA2
ENSG00000129968	1314.62	-1.26475	0.118692	-10.6558	1.64e-26	4.56e-25	ABHD17A
ENSG00000021355	1277.62	-1.26417	0.131552	-9.60967	7.28e-22	1.55e-20	SERPINB1
ENSG00000196517	146.155	-1.26415	0.372699	-3.39189	0.000694128	0.0023876	SLC6A9
ENSG00000059915	188.195	-1.26362	0.315051	-4.01086	6.05e-05	0.00025673	PSD
ENSG00000104687	1778.01	-1.26351	0.127901	-9.87888	5.14e-23	1.18e-21	GSR
ENSG00000130513	7199.65	-1.26211	0.093665	-13.4747	2.2e-41	1.27e-39	GDF15
ENSG00000133134	571.175	-1.26099	0.190242	-6.62832	3.4e-11	3.14e-10	BEX2
ENSG00000110315	1169.41	-1.25847	0.125286	-10.0448	9.68e-24	2.28e-22	RNF141
ENSG00000138759	354.74	-1.25794	0.279896	-4.4943	6.98e-06	3.43e-05	FRAS1
ENSG00000183386	311.396	-1.25794	0.287155	-4.38069	1.18e-05	5.62e-05	FHL3
ENSG00000105220	9375.32	-1.25779	0.0725183	-17.3445	2.17e-67	2.73e-65	GPI
ENSG00000186577	161.417	-1.25759	0.310606	-4.04884	5.15e-05	0.000221057	SMIM29
ENSG00000171421	582.203	-1.25737	0.185228	-6.78825	1.14e-11	1.1e-10	MRPL36
ENSG00000092010	3130.62	-1.25669	0.0950364	-13.2233	6.44e-40	3.37e-38	PSME1
ENSG00000074219	305.28	-1.25666	0.255901	-4.91074	9.07e-07	5.1e-06	TEAD2
ENSG00000176946	1285.22	-1.25651	0.138298	-9.08555	1.03e-19	1.89e-18	THAP4
ENSG00000079691	280.598	-1.25628	0.238515	-5.2671	1.39e-07	8.65e-07	CARMIL1
ENSG00000184254	1056.87	-1.25627	0.181643	-6.91614	4.64e-12	4.7e-11	ALDH1A3
ENSG00000196365	3781.63	-1.25544	0.113911	-11.0212	3.02e-28	9.18e-27	LONP1
ENSG00000104946	549.306	-1.25489	0.1914	-6.55638	5.51e-11	4.99e-10	TBC1D17
ENSG00000099785	370.749	-1.25439	0.226489	-5.53841	3.05e-08	2.07e-07	37316
ENSG00000154237	183.344	-1.25423	0.366625	-3.42102	0.000623874	0.00216368	LRRK1
ENSG00000169375	670.031	-1.25388	0.184262	-6.80488	1.01e-11	9.93e-11	SIN3A
ENSG00000171700	298.707	-1.25332	0.244789	-5.11999	3.06e-07	1.83e-06	RGS19
ENSG00000197363	148.985	-1.25271	0.351975	-3.55909	0.000372138	0.0013598	ZNF517
ENSG00000100867	280.457	-1.25243	0.323329	-3.87354	0.000107266	0.000436835	DHRS2
ENSG00000186281	698.827	-1.25038	0.194387	-6.43245	1.26e-10	1.1e-09	GPAT2
ENSG00000160972	954.911	-1.24995	0.149998	-8.33312	7.87e-17	1.18e-15	PPP1R16A
ENSG00000076706	347.245	-1.24992	0.214728	-5.82097	5.85e-09	4.33e-08	MCAM
ENSG00000186891	1058.76	-1.24978	0.140611	-8.88823	6.21e-19	1.08e-17	TNFRSF18
ENSG00000148334	2172.24	-1.24976	0.10379	-12.0412	2.16e-33	8.39e-32	PTGES2
ENSG00000163931	13060.4	-1.249	0.0772516	-16.1679	8.49e-59	8.14e-57	TKT
ENSG00000103479	206.968	-1.24873	0.324919	-3.8432	0.00012144	0.000490227	RBL2
ENSG00000158716	379.992	-1.24833	0.210332	-5.93506	2.94e-09	2.24e-08	DUSP23
ENSG00000124098	303.445	-1.24752	0.247869	-5.033	4.83e-07	2.81e-06	FAM210B
ENSG00000166979	312.826	-1.24728	0.231165	-5.39566	6.83e-08	4.42e-07	EVA1C
ENSG00000084092	820.808	-1.24714	0.168839	-7.38655	1.51e-13	1.74e-12	NOA1
ENSG00000112146	487.555	-1.24706	0.28544	-4.36891	1.25e-05	5.91e-05	FBXO9
ENSG00000143320	3094.48	-1.24652	0.106116	-11.7467	7.34e-32	2.65e-30	CRABP2
ENSG00000064270	215.426	-1.24634	0.316673	-3.93574	8.29e-05	0.00034423	ATP2C2
ENSG00000137054	767.59	-1.24603	0.169068	-7.37	1.71e-13	1.96e-12	POLR1E
ENSG00000133131	330.318	-1.24549	0.219894	-5.66404	1.48e-08	1.04e-07	MORC4
ENSG00000168556	111.839	-1.24548	0.371687	-3.35088	0.000805542	0.00273103	ING2
ENSG00000082014	830.435	-1.24391	0.149677	-8.31066	9.52e-17	1.42e-15	SMARCD3
ENSG00000101189	863.996	-1.24389	0.143221	-8.68513	3.78e-18	6.2e-17	MRGBP
ENSG00000170085	213.646	-1.24367	0.279744	-4.44575	8.76e-06	4.24e-05	SIMC1
ENSG00000160781	210.809	-1.24309	0.335038	-3.71029	0.000207023	0.000794761	PAQR6
ENSG00000060656	909.723	-1.24255	0.156851	-7.92189	2.34e-15	3.12e-14	PTPRU
ENSG00000184381	241.297	-1.24255	0.291362	-4.26463	2e-05	9.17e-05	PLA2G6
ENSG00000177595	821.642	-1.23983	0.15454	-8.02276	1.03e-15	1.42e-14	PIDD1
ENSG00000156453	501.885	-1.23934	0.219785	-5.63888	1.71e-08	1.2e-07	PCDH1
ENSG00000140365	1249.33	-1.23919	0.144202	-8.59343	8.44e-18	1.35e-16	COMMD4
ENSG00000106211	8290.77	-1.23804	0.0802289	-15.4313	1.01e-53	8.39e-52	HSPB1
ENSG00000142657	2526.88	-1.23719	0.115624	-10.7002	1.02e-26	2.85e-25	PGD
ENSG00000175061	9641.87	-1.23657	0.0691121	-17.8923	1.35e-71	2.05e-69	SNHG29
ENSG00000160991	251.628	-1.23637	0.284112	-4.35172	1.35e-05	6.37e-05	ORAI2
ENSG00000143797	164.81	-1.23606	0.357156	-3.46083	0.000538514	0.00189832	MBOAT2
ENSG00000167815	4318.6	-1.2359	0.0977838	-12.6391	1.29e-36	5.81e-35	PRDX2
ENSG00000164252	272.315	-1.23542	0.256418	-4.818	1.45e-06	7.9e-06	AGGF1
ENSG00000125652	838.913	-1.23469	0.143099	-8.62822	6.23e-18	1.01e-16	ALKBH7
ENSG00000079462	1479.23	-1.23416	0.125559	-9.82939	8.41e-23	1.9e-21	PAFAH1B3
ENSG00000137161	1231.43	-1.23307	0.131666	-9.36509	7.6e-21	1.52e-19	CNPY3
ENSG00000117151	259.586	-1.23296	0.260122	-4.73995	2.14e-06	1.14e-05	CTBS
ENSG00000162836	260.155	-1.23262	0.25425	-4.84806	1.25e-06	6.86e-06	ACP6
ENSG00000173327	1246.34	-1.23115	0.126077	-9.76507	1.59e-22	3.52e-21	MAP3K11
ENSG00000188846	22540.4	-1.23067	0.0617202	-19.9395	1.85e-88	4.37e-86	RPL14
ENSG00000119431	451.659	-1.22951	0.209796	-5.86048	4.62e-09	3.45e-08	HDHD3
ENSG00000104884	1185.09	-1.22918	0.148916	-8.25419	1.53e-16	2.24e-15	ERCC2
ENSG00000140688	384.274	-1.22892	0.239541	-5.13029	2.89e-07	1.74e-06	C16orf58
ENSG00000065621	1703.25	-1.22848	0.131192	-9.36397	7.68e-21	1.53e-19	GSTO2
ENSG00000178035	10806.1	-1.22825	0.0681431	-18.0246	1.25e-72	1.97e-70	IMPDH2
ENSG00000159184	251.908	-1.22627	0.279706	-4.38413	1.16e-05	5.54e-05	HOXB13
ENSG00000186897	245.086	-1.22552	0.287841	-4.25762	2.07e-05	9.45e-05	C1QL4
ENSG00000138764	192.405	-1.22493	0.308975	-3.96449	7.36e-05	0.000307772	CCNG2
ENSG00000162869	244.005	-1.2242	0.25807	-4.74366	2.1e-06	1.12e-05	PPP1R21
ENSG00000163932	762.766	-1.22378	0.154595	-7.91604	2.45e-15	3.26e-14	PRKCD
ENSG00000094631	690.277	-1.22378	0.175041	-6.99138	2.72e-12	2.82e-11	HDAC6
ENSG00000116273	457.917	-1.2233	0.195907	-6.24428	4.26e-10	3.54e-09	PHF13
ENSG00000146281	323.185	-1.22218	0.268801	-4.54678	5.45e-06	2.73e-05	PM20D2
ENSG00000092929	207.779	-1.22191	0.277596	-4.40177	1.07e-05	5.14e-05	UNC13D
ENSG00000063761	132.368	-1.22151	0.358722	-3.40518	0.000661204	0.00228267	ADCK1
ENSG00000184967	619.781	-1.22149	0.178694	-6.83564	8.16e-12	8.08e-11	NOC4L
ENSG00000196372	391.705	-1.22146	0.208824	-5.84927	4.94e-09	3.67e-08	ASB13
ENSG00000073060	1313.43	-1.22135	0.123154	-9.91722	3.5e-23	8.06e-22	SCARB1
ENSG00000140043	168.307	-1.22132	0.305006	-4.00424	6.22e-05	0.000263428	PTGR2
ENSG00000115234	1636.89	-1.22036	0.11461	-10.6479	1.78e-26	4.95e-25	SNX17
ENSG00000113719	1515.75	-1.22033	0.130298	-9.36568	7.56e-21	1.51e-19	ERGIC1
ENSG00000184857	224.569	-1.2186	0.260775	-4.67301	2.97e-06	1.55e-05	TMEM186
ENSG00000139613	554.659	-1.21856	0.179364	-6.79379	1.09e-11	1.07e-10	SMARCC2
ENSG00000127946	467.272	-1.21821	0.201031	-6.05979	1.36e-09	1.08e-08	HIP1
ENSG00000121653	115.658	-1.21694	0.384183	-3.16761	0.00153699	0.00488463	MAPK8IP1
ENSG00000147010	1189.68	-1.21569	0.140867	-8.63008	6.13e-18	9.93e-17	SH3KBP1
ENSG00000100596	681.319	-1.21493	0.167005	-7.2748	3.47e-13	3.9e-12	SPTLC2
ENSG00000115107	713.116	-1.2147	0.175867	-6.90693	4.95e-12	5.01e-11	STEAP3
ENSG00000105426	964.668	-1.21359	0.155494	-7.80472	5.96e-15	7.71e-14	PTPRS
ENSG00000174206	128.864	-1.21182	0.375772	-3.22488	0.00126025	0.00408839	C12orf66
ENSG00000108773	816.096	-1.21165	0.156	-7.76698	8.04e-15	1.03e-13	KAT2A
ENSG00000182173	1330.07	-1.2116	0.135527	-8.93995	3.89e-19	6.86e-18	TSEN54
ENSG00000151743	172.445	-1.21158	0.326021	-3.71626	0.000202194	0.000778438	AMN1
ENSG00000131187	510.606	-1.21049	0.197994	-6.11377	9.73e-10	7.83e-09	F12
ENSG00000166938	374.043	-1.20966	0.204631	-5.91142	3.39e-09	2.57e-08	DIS3L
ENSG00000157326	241.66	-1.20906	0.259004	-4.66812	3.04e-06	1.58e-05	DHRS4
ENSG00000100263	305.928	-1.20844	0.255407	-4.7314	2.23e-06	1.18e-05	RHBDD3
ENSG00000064490	804.83	-1.20781	0.170058	-7.10238	1.23e-12	1.31e-11	RFXANK
ENSG00000111252	291.767	-1.20776	0.249978	-4.83146	1.36e-06	7.42e-06	SH2B3
ENSG00000100300	2516.67	-1.20741	0.108928	-11.0845	1.49e-28	4.61e-27	TSPO
ENSG00000151093	253.35	-1.20666	0.289766	-4.16427	3.12e-05	0.000139412	OXSM
ENSG00000001617	367.538	-1.20613	0.216224	-5.57814	2.43e-08	1.67e-07	SEMA3F
ENSG00000064933	250.058	-1.20585	0.375115	-3.21462	0.00130619	0.00422074	PMS1
ENSG00000179965	236.982	-1.20543	0.283566	-4.25097	2.13e-05	9.72e-05	ZNF771
ENSG00000174939	333.366	-1.2054	0.232352	-5.18783	2.13e-07	1.3e-06	ASPHD1
ENSG00000162191	2175.89	-1.20501	0.0994791	-12.1132	8.99e-34	3.58e-32	UBXN1
ENSG00000172819	892.519	-1.20491	0.150226	-8.02066	1.05e-15	1.44e-14	RARG
ENSG00000147130	566.354	-1.20475	0.181849	-6.62498	3.47e-11	3.21e-10	ZMYM3
ENSG00000133243	2545.58	-1.20361	0.0948151	-12.6943	6.36e-37	2.89e-35	BTBD2
ENSG00000101210	11494.8	-1.20356	0.0650988	-18.4882	2.57e-76	4.62e-74	EEF1A2
ENSG00000159714	159.7	-1.20306	0.335788	-3.58279	0.000339947	0.00125187	ZDHHC1
ENSG00000187742	552.257	-1.20288	0.217225	-5.53747	3.07e-08	2.08e-07	SECISBP2
ENSG00000174684	159.064	-1.20277	0.34023	-3.53517	0.000407508	0.00147139	B4GAT1
ENSG00000126107	653.458	-1.20272	0.181683	-6.6199	3.59e-11	3.31e-10	HECTD3
ENSG00000179604	1098.74	-1.20132	0.1364	-8.80727	1.28e-18	2.16e-17	CDC42EP4
ENSG00000121900	1414.76	-1.20112	0.141028	-8.51686	1.64e-17	2.59e-16	TMEM54
ENSG00000165644	434.175	-1.20102	0.189656	-6.3326	2.41e-10	2.05e-09	COMTD1
ENSG00000154529	138.154	-1.20067	0.367832	-3.26417	0.00109784	0.00360864	CNTNAP3B
ENSG00000214026	472.301	-1.20057	0.206282	-5.82005	5.88e-09	4.36e-08	MRPL23
ENSG00000123213	586.478	-1.1992	0.16677	-7.19071	6.45e-13	7.06e-12	NLN
ENSG00000148450	431.837	-1.19893	0.236856	-5.06183	4.15e-07	2.44e-06	MSRB2
ENSG00000229891	189.448	-1.19808	0.313936	-3.81631	0.000135464	0.000541857	LINC01315
ENSG00000123143	5527.05	-1.19786	0.0882026	-13.5808	5.21e-42	3.17e-40	PKN1
ENSG00000128951	1010.73	-1.19739	0.134098	-8.92925	4.29e-19	7.53e-18	DUT
ENSG00000106305	368.923	-1.19637	0.221902	-5.39145	6.99e-08	4.52e-07	AIMP2
ENSG00000105612	751.342	-1.19601	0.154076	-7.76248	8.33e-15	1.06e-13	DNASE2
ENSG00000099290	214.939	-1.19582	0.321221	-3.72274	0.000197073	0.000761047	WASHC2A
ENSG00000171903	215.959	-1.19532	0.287001	-4.16487	3.12e-05	0.000139111	CYP4F11
ENSG00000175115	629.444	-1.19524	0.175089	-6.82644	8.7e-12	8.59e-11	PACS1
ENSG00000236552	166.896	-1.19426	0.369247	-3.2343	0.0012194	0.00397361	RPL13AP5
ENSG00000233426	115.705	-1.19374	0.369118	-3.23404	0.00122052	0.00397591	EIF3FP3
ENSG00000117593	231.754	-1.19191	0.26584	-4.48354	7.34e-06	3.59e-05	DARS2
ENSG00000198712	109576	-1.19142	0.150567	-7.91289	2.51e-15	3.34e-14	MT-CO2
ENSG00000077348	876.686	-1.19076	0.14544	-8.1873	2.67e-16	3.83e-15	EXOSC5
ENSG00000188322	636.432	-1.19014	0.18038	-6.59795	4.17e-11	3.82e-10	SBK1
ENSG00000103024	1700.54	-1.18878	0.116119	-10.2376	1.35e-24	3.3e-23	NME3
ENSG00000177628	150.386	-1.1886	0.365804	-3.24927	0.00115701	0.00378601	GBA
ENSG00000131171	499.093	-1.18811	0.198026	-5.99979	1.98e-09	1.53e-08	SH3BGRL
ENSG00000176973	276.016	-1.18637	0.268404	-4.42007	9.87e-06	4.74e-05	FAM89B
ENSG00000105186	499.63	-1.18604	0.206201	-5.75185	8.83e-09	6.41e-08	ANKRD27
ENSG00000138111	569.62	-1.18563	0.177577	-6.67671	2.44e-11	2.29e-10	MFSD13A
ENSG00000104812	842.74	-1.1851	0.142686	-8.30564	9.93e-17	1.48e-15	GYS1
ENSG00000124787	158.276	-1.18365	0.33206	-3.56458	0.000364439	0.00133399	RPP40
ENSG00000020256	208.366	-1.18348	0.297071	-3.98382	6.78e-05	0.000285545	ZFP64
ENSG00000131669	817.585	-1.18321	0.145731	-8.11912	4.7e-16	6.58e-15	NINJ1
ENSG00000137309	41033	-1.18228	0.0660589	-17.8974	1.24e-71	1.88e-69	HMGA1
ENSG00000144468	498.77	-1.18227	0.243105	-4.86323	1.15e-06	6.39e-06	RHBDD1
ENSG00000143553	417.762	-1.1805	0.224178	-5.26589	1.4e-07	8.7e-07	SNAPIN
ENSG00000176428	219.051	-1.17874	0.283954	-4.15116	3.31e-05	0.000147156	VPS37D
ENSG00000100099	415.379	-1.17859	0.221527	-5.32031	1.04e-07	6.56e-07	HPS4
ENSG00000266714	165.819	-1.17805	0.321123	-3.66853	0.000243948	0.000924115	MYO15B
ENSG00000100994	2169.69	-1.17724	0.107502	-10.9508	6.58e-28	1.96e-26	PYGB
ENSG00000166337	1705.73	-1.17604	0.119108	-9.87375	5.41e-23	1.24e-21	TAF10
ENSG00000139044	327.093	-1.17576	0.228037	-5.15601	2.52e-07	1.53e-06	B4GALNT3
ENSG00000163933	371.662	-1.17457	0.241844	-4.85673	1.19e-06	6.59e-06	RFT1
ENSG00000154310	271.205	-1.17431	0.23597	-4.97655	6.47e-07	3.7e-06	TNIK
ENSG00000131089	159.443	-1.17388	0.358252	-3.27668	0.00105034	0.003467	ARHGEF9
ENSG00000132670	1088.8	-1.17354	0.13983	-8.39261	4.75e-17	7.24e-16	PTPRA
ENSG00000138629	943.109	-1.17287	0.138313	-8.47982	2.26e-17	3.53e-16	UBL7
ENSG00000186815	432.554	-1.17264	0.235176	-4.98623	6.16e-07	3.53e-06	TPCN1
ENSG00000167930	420.262	-1.17116	0.226922	-5.16106	2.46e-07	1.49e-06	FAM234A
ENSG00000142632	968.965	-1.16884	0.155575	-7.51303	5.78e-14	6.93e-13	ARHGEF19
ENSG00000119929	753.401	-1.16877	0.194393	-6.0124	1.83e-09	1.43e-08	CUTC
ENSG00000129993	258.521	-1.16876	0.311435	-3.75281	0.000174862	0.000683806	CBFA2T3
ENSG00000116852	150.921	-1.16819	0.347907	-3.35775	0.000785796	0.00266984	KIF21B
ENSG00000155367	169.412	-1.16803	0.346651	-3.36948	0.000753107	0.0025708	PPM1J
ENSG00000149485	737.891	-1.16724	0.156497	-7.45853	8.75e-14	1.03e-12	FADS1
ENSG00000167861	859.482	-1.16716	0.148646	-7.8519	4.1e-15	5.37e-14	HID1
ENSG00000112855	565.713	-1.16671	0.191994	-6.0768	1.23e-09	9.74e-09	HARS2
ENSG00000123415	377.447	-1.16598	0.200022	-5.82925	5.57e-09	4.13e-08	SMUG1
ENSG00000168906	1822.6	-1.16529	0.113115	-10.3018	6.91e-25	1.72e-23	MAT2A
ENSG00000100897	918.288	-1.16505	0.139535	-8.34952	6.85e-17	1.03e-15	DCAF11
ENSG00000226887	216.408	-1.16408	0.279884	-4.15914	3.19e-05	0.000142406	ERVMER34-1
ENSG00000112812	125.289	-1.16404	0.357807	-3.25326	0.0011409	0.00373845	PRSS16
ENSG00000072195	583.259	-1.16246	0.185539	-6.26534	3.72e-10	3.12e-09	SPEG
ENSG00000117448	1973.17	-1.16211	0.107648	-10.7955	3.61e-27	1.04e-25	AKR1A1
ENSG00000138796	563.177	-1.16189	0.219762	-5.28702	1.24e-07	7.79e-07	HADH
ENSG00000197766	1060.2	-1.16163	0.139314	-8.33821	7.54e-17	1.13e-15	CFD
ENSG00000168792	183.943	-1.16106	0.302042	-3.84402	0.000121034	0.000488692	ABHD15
ENSG00000175707	363.014	-1.16043	0.225138	-5.15432	2.55e-07	1.54e-06	KDF1
ENSG00000167705	197.865	-1.1594	0.301545	-3.84487	0.000120614	0.000487203	RILP
ENSG00000235034	130.643	-1.15899	0.364884	-3.17633	0.00149151	0.00475291	C19orf81
ENSG00000120254	1476.94	-1.15865	0.123	-9.41991	4.51e-21	9.12e-20	MTHFD1L
ENSG00000136933	789.154	-1.15846	0.179149	-6.46645	1e-10	8.87e-10	RABEPK
ENSG00000248527	4920.81	-1.15812	0.117831	-9.82859	8.48e-23	1.91e-21	MTATP6P1
ENSG00000143845	341.345	-1.1581	0.230751	-5.01884	5.2e-07	3.01e-06	ETNK2
ENSG00000196526	248.597	-1.15767	0.252251	-4.58934	4.45e-06	2.26e-05	AFAP1
ENSG00000135424	264.657	-1.15686	0.255257	-4.53213	5.84e-06	2.91e-05	ITGA7
ENSG00000115271	185.241	-1.15666	0.348433	-3.31961	0.000901448	0.00301986	GCA
ENSG00000182325	993.248	-1.15386	0.145777	-7.9152	2.47e-15	3.28e-14	FBXL6
ENSG00000159023	404.043	-1.15342	0.203429	-5.66991	1.43e-08	1.01e-07	EPB41
ENSG00000114388	639.515	-1.15291	0.17129	-6.73076	1.69e-11	1.61e-10	NPRL2
ENSG00000167257	240.143	-1.15268	0.305279	-3.77582	0.000159481	0.000629128	RNF214
ENSG00000106948	263.07	-1.15244	0.290871	-3.96204	7.43e-05	0.00031074	AKNA
ENSG00000103037	250.574	-1.15237	0.250286	-4.60421	4.14e-06	2.11e-05	SETD6
ENSG00000179409	851.099	-1.14979	0.165507	-6.94706	3.73e-12	3.81e-11	GEMIN4
ENSG00000198899	43904.7	-1.14966	0.174335	-6.59453	4.27e-11	3.9e-10	MT-ATP6
ENSG00000213347	616.413	-1.14862	0.173482	-6.62097	3.57e-11	3.29e-10	MXD3
ENSG00000204681	286.344	-1.14833	0.283549	-4.04983	5.13e-05	0.000220273	GABBR1
ENSG00000125637	227.063	-1.14812	0.281135	-4.08389	4.43e-05	0.000192528	PSD4
ENSG00000151500	464.539	-1.1471	0.197555	-5.80646	6.38e-09	4.7e-08	THYN1
ENSG00000100023	501.293	-1.14688	0.187578	-6.11415	9.71e-10	7.82e-09	PPIL2
ENSG00000074211	486.387	-1.14524	0.211997	-5.40217	6.58e-08	4.28e-07	PPP2R2C
ENSG00000103148	509.452	-1.14425	0.232162	-4.92868	8.28e-07	4.68e-06	NPRL3
ENSG00000110042	194.317	-1.14394	0.283571	-4.03404	5.48e-05	0.000234402	DTX4
ENSG00000089639	225.362	-1.14319	0.268307	-4.26075	2.04e-05	9.32e-05	GMIP
ENSG00000141101	1731.41	-1.14284	0.113353	-10.0821	6.63e-24	1.57e-22	NOB1
ENSG00000099624	5045.86	-1.14157	0.084955	-13.4373	3.66e-41	2.08e-39	ATP5F1D
ENSG00000184232	660.649	-1.14134	0.169688	-6.72611	1.74e-11	1.66e-10	OAF
ENSG00000256269	879.586	-1.14033	0.138026	-8.26168	1.44e-16	2.12e-15	HMBS
ENSG00000071994	1403.21	-1.14006	0.113096	-10.0805	6.74e-24	1.59e-22	PDCD2
ENSG00000087008	269.776	-1.14006	0.252684	-4.51179	6.43e-06	3.18e-05	ACOX3
ENSG00000204580	2671.98	-1.13834	0.0955988	-11.9075	1.08e-32	4.09e-31	DDR1
ENSG00000211450	1390.95	-1.13775	0.161973	-7.0243	2.15e-12	2.25e-11	SELENOH
ENSG00000111716	17212.8	-1.13753	0.0588519	-19.3287	3.08e-83	6.25e-81	LDHB
ENSG00000166340	673.565	-1.13709	0.193555	-5.8748	4.23e-09	3.18e-08	TPP1
ENSG00000142798	294.542	-1.13638	0.246764	-4.6051	4.12e-06	2.1e-05	HSPG2
ENSG00000172889	1863.64	-1.13525	0.115087	-9.86426	5.95e-23	1.35e-21	EGFL7
ENSG00000160447	954.154	-1.13517	0.133586	-8.49764	1.93e-17	3.03e-16	PKN3
ENSG00000178971	568.204	-1.1348	0.181898	-6.23867	4.41e-10	3.66e-09	CTC1
ENSG00000167685	402.245	-1.13438	0.235491	-4.8171	1.46e-06	7.93e-06	ZNF444
ENSG00000179051	3368.86	-1.13431	0.0973704	-11.6494	2.31e-31	8.18e-30	RCC2
ENSG00000099622	3159.11	-1.13378	0.115986	-9.77509	1.44e-22	3.2e-21	CIRBP
ENSG00000083544	214.372	-1.13225	0.278185	-4.07013	4.7e-05	0.000203232	TDRD3
ENSG00000125354	240.952	-1.13192	0.261554	-4.32768	1.51e-05	7.04e-05	SEPTIN6
ENSG00000101997	293.194	-1.13069	0.322412	-3.50699	0.000453208	0.00162123	CCDC22
ENSG00000205643	218.196	-1.13062	0.304663	-3.71105	0.000206399	0.000792686	CDPF1
ENSG00000169957	1269.5	-1.12987	0.119144	-9.48326	2.46e-21	5.04e-20	ZNF768
ENSG00000100726	902.969	-1.12958	0.148222	-7.62084	2.52e-14	3.1e-13	TELO2
ENSG00000117308	2055.09	-1.12879	0.121705	-9.27476	1.78e-20	3.47e-19	GALE
ENSG00000143363	207.588	-1.12765	0.329674	-3.4205	0.000625062	0.0021674	PRUNE1
ENSG00000176476	234.953	-1.12704	0.334167	-3.3727	0.000744347	0.00254366	SGF29
ENSG00000117280	256.517	-1.1265	0.271856	-4.14372	3.42e-05	0.000151478	RAB29
ENSG00000160691	1609.9	-1.12647	0.12824	-8.78409	1.58e-18	2.64e-17	SHC1
ENSG00000197712	386.324	-1.12561	0.208134	-5.40808	6.37e-08	4.15e-07	FAM114A1
ENSG00000118960	409.743	-1.12456	0.231744	-4.85262	1.22e-06	6.72e-06	HS1BP3
ENSG00000205352	1100.14	-1.12379	0.1643	-6.83986	7.93e-12	7.85e-11	PRR13
ENSG00000100167	202.13	-1.1234	0.311321	-3.6085	0.000307967	0.00114369	SEPTIN3
ENSG00000054690	193.535	-1.12334	0.3304	-3.39993	0.000674033	0.00232329	PLEKHH1
ENSG00000169047	707.532	-1.12322	0.187945	-5.97634	2.28e-09	1.76e-08	IRS1
ENSG00000144354	494.402	-1.12273	0.206589	-5.4346	5.49e-08	3.6e-07	CDCA7
ENSG00000213380	369.448	-1.12265	0.209021	-5.371	7.83e-08	5.04e-07	COG8
ENSG00000137198	463.638	-1.12208	0.221516	-5.06547	4.07e-07	2.4e-06	GMPR
ENSG00000250571	311.487	-1.12168	0.279728	-4.00989	6.07e-05	0.000257616	GLI4
ENSG00000171302	1223.59	-1.12158	0.1491	-7.52235	5.38e-14	6.47e-13	CANT1
ENSG00000125246	361.862	-1.12046	0.297406	-3.76743	0.000164937	0.000648483	CLYBL
ENSG00000213672	464.292	-1.1202	0.189368	-5.91547	3.31e-09	2.51e-08	NCKIPSD
ENSG00000082516	426.873	-1.11968	0.201252	-5.56359	2.64e-08	1.8e-07	GEMIN5
ENSG00000196544	152.974	-1.11879	0.33447	-3.34498	0.000822898	0.00278388	BORCS6
ENSG00000136444	1327.04	-1.11858	0.116225	-9.62429	6.31e-22	1.35e-20	RSAD1
ENSG00000065029	586.913	-1.11856	0.168689	-6.63089	3.34e-11	3.09e-10	ZNF76
ENSG00000104140	168.957	-1.11835	0.298553	-3.74589	0.000179758	0.000700197	RHOV
ENSG00000046647	152.835	-1.11719	0.33325	-3.3524	0.000801129	0.00271754	GEMIN8
ENSG00000104805	1838.61	-1.11656	0.122028	-9.15006	5.69e-20	1.06e-18	NUCB1
ENSG00000172893	1358.82	-1.11488	0.122128	-9.12881	6.93e-20	1.28e-18	DHCR7
ENSG00000130429	3767.77	-1.11463	0.0943411	-11.8149	3.27e-32	1.2e-30	ARPC1B
ENSG00000022267	275.829	-1.11388	0.335506	-3.31999	0.000900197	0.0030162	FHL1
ENSG00000129480	167.298	-1.11355	0.293498	-3.79408	0.000148193	0.000588535	DTD2
ENSG00000073670	225.221	-1.11249	0.256349	-4.33976	1.43e-05	6.69e-05	ADAM11
ENSG00000160957	2234.02	-1.11184	0.122535	-9.0737	1.15e-19	2.09e-18	RECQL4
ENSG00000218891	689.588	-1.11093	0.151043	-7.35507	1.91e-13	2.18e-12	ZNF579
ENSG00000197006	506.262	-1.11069	0.18579	-5.97818	2.26e-09	1.74e-08	METTL9
ENSG00000261221	449.289	-1.10928	0.206347	-5.37582	7.62e-08	4.91e-07	ZNF865
ENSG00000223501	405.256	-1.10828	0.225558	-4.91351	8.95e-07	5.03e-06	VPS52
ENSG00000141510	1543.42	-1.10732	0.12205	-9.07265	1.16e-19	2.11e-18	TP53
ENSG00000073050	607.862	-1.10668	0.198469	-5.57607	2.46e-08	1.69e-07	XRCC1
ENSG00000171045	159.806	-1.10582	0.305472	-3.62004	0.00029456	0.00109714	TSNARE1
ENSG00000167355	731.006	-1.10501	0.151821	-7.27834	3.38e-13	3.81e-12	OR51B5
ENSG00000180921	1682.6	-1.10451	0.124423	-8.87703	6.87e-19	1.19e-17	FAM83H
ENSG00000185033	884.945	-1.10363	0.155514	-7.09666	1.28e-12	1.36e-11	SEMA4B
ENSG00000139239	136.378	-1.10283	0.342989	-3.21536	0.00130283	0.00421206	RPL14P1
ENSG00000049239	537.164	-1.10231	0.208353	-5.29056	1.22e-07	7.66e-07	H6PD
ENSG00000196476	378.383	-1.10174	0.263574	-4.17998	2.92e-05	0.000130799	C20orf96
ENSG00000240342	9636.68	-1.10121	0.0587997	-18.7282	2.91e-78	5.5e-76	RPS2P5
ENSG00000065485	832.014	-1.10081	0.153329	-7.17938	7e-13	7.65e-12	PDIA5
ENSG00000189143	4692.27	-1.10042	0.0971409	-11.3281	9.52e-30	3.1e-28	CLDN4
ENSG00000089289	1207.08	-1.10018	0.15142	-7.26573	3.71e-13	4.16e-12	IGBP1
ENSG00000111981	150.415	-1.09991	0.319871	-3.4386	0.000584734	0.00204294	ULBP1
ENSG00000125901	1650.85	-1.09897	0.114017	-9.63863	5.49e-22	1.18e-20	MRPS26
ENSG00000009950	985.954	-1.09889	0.142181	-7.7288	1.09e-14	1.38e-13	MLXIPL
ENSG00000103544	318.268	-1.0986	0.253655	-4.3311	1.48e-05	6.94e-05	VPS35L
ENSG00000146828	554.425	-1.09846	0.170202	-6.45384	1.09e-10	9.61e-10	SLC12A9
ENSG00000137819	314.687	-1.09838	0.281852	-3.89701	9.74e-05	0.00039963	PAQR5
ENSG00000119522	461.22	-1.09781	0.198548	-5.52918	3.22e-08	2.17e-07	DENND1A
ENSG00000174718	318.361	-1.09592	0.245107	-4.47121	7.78e-06	3.8e-05	RESF1
ENSG00000121211	276.944	-1.09492	0.239247	-4.5765	4.73e-06	2.39e-05	MND1
ENSG00000043355	424.997	-1.0946	0.222098	-4.92846	8.29e-07	4.68e-06	ZIC2
ENSG00000198837	565.87	-1.09417	0.208959	-5.23627	1.64e-07	1.01e-06	DENND4B
ENSG00000160813	554.497	-1.09224	0.184217	-5.92909	3.05e-09	2.32e-08	PPP1R35
ENSG00000254986	773.298	-1.09176	0.148245	-7.36456	1.78e-13	2.04e-12	DPP3
ENSG00000013288	512.967	-1.09174	0.187807	-5.8131	6.13e-09	4.53e-08	MAN2B2
ENSG00000135392	139.659	-1.09107	0.338883	-3.21959	0.00128375	0.0041543	DNAJC14
ENSG00000169926	853.115	-1.09016	0.151481	-7.19669	6.17e-13	6.77e-12	KLF13
ENSG00000131558	336.563	-1.08916	0.230965	-4.71569	2.41e-06	1.27e-05	EXOC4
ENSG00000137038	468.531	-1.08811	0.219255	-4.96278	6.95e-07	3.96e-06	DMAC1
ENSG00000102897	460.045	-1.08619	0.187425	-5.79533	6.82e-09	5e-08	LYRM1
ENSG00000170275	1898.83	-1.0856	0.102691	-10.5716	4.04e-26	1.09e-24	CRTAP
ENSG00000125898	463.613	-1.08523	0.202825	-5.35059	8.77e-08	5.61e-07	FAM110A
ENSG00000162512	1010.83	-1.08494	0.138757	-7.81901	5.32e-15	6.9e-14	SDC3
ENSG00000105357	1152.9	-1.08343	0.161095	-6.72539	1.75e-11	1.66e-10	MYH14
ENSG00000196923	1861.6	-1.08331	0.113784	-9.52076	1.72e-21	3.56e-20	PDLIM7
ENSG00000115884	746.224	-1.08324	0.157513	-6.87719	6.1e-12	6.12e-11	SDC1
ENSG00000173227	152.744	-1.08323	0.325824	-3.3246	0.000885459	0.00297474	SYT12
ENSG00000182118	408.991	-1.08173	0.228136	-4.74159	2.12e-06	1.13e-05	FAM89A
ENSG00000148303	38394.7	-1.08155	0.0549437	-19.6847	2.92e-86	6.41e-84	RPL7A
ENSG00000172992	423.704	-1.08037	0.205573	-5.25541	1.48e-07	9.18e-07	DCAKD
ENSG00000129354	1959.51	-1.07991	0.0998689	-10.8133	2.98e-27	8.59e-26	AP1M2
ENSG00000085377	905.709	-1.07941	0.158997	-6.78889	1.13e-11	1.1e-10	PREP
ENSG00000167658	66667.9	-1.07916	0.0666926	-16.181	6.86e-59	6.65e-57	EEF2
ENSG00000130717	321.632	-1.07834	0.22523	-4.7877	1.69e-06	9.11e-06	UCK1
ENSG00000178401	512.449	-1.07729	0.187787	-5.73677	9.65e-09	6.97e-08	DNAJC22
ENSG00000162585	1547.71	-1.0769	0.114557	-9.40064	5.42e-21	1.09e-19	FAAP20
ENSG00000114767	1424.45	-1.07677	0.135668	-7.93674	2.08e-15	2.78e-14	RRP9
ENSG00000162227	263.965	-1.07628	0.319717	-3.36634	0.000761715	0.00259737	TAF6L
ENSG00000099875	3412.34	-1.07566	0.114494	-9.39493	5.73e-21	1.15e-19	MKNK2
ENSG00000164323	254.735	-1.07404	0.249068	-4.31224	1.62e-05	7.51e-05	CFAP97
ENSG00000105379	1603.39	-1.07328	0.13352	-8.03838	9.1e-16	1.25e-14	ETFB
ENSG00000106524	285.067	-1.07297	0.240695	-4.45781	8.28e-06	4.03e-05	ANKMY2
ENSG00000165724	878.647	-1.07255	0.14494	-7.39998	1.36e-13	1.58e-12	ZMYND19
ENSG00000163050	751.025	-1.07246	0.186541	-5.74919	8.97e-09	6.51e-08	COQ8A
ENSG00000273604	1187.88	-1.0721	0.142034	-7.54825	4.41e-14	5.35e-13	EPOP
ENSG00000135476	596.62	-1.07167	0.188055	-5.69869	1.21e-08	8.61e-08	ESPL1
ENSG00000108448	185.225	-1.0712	0.321563	-3.33124	0.000864611	0.00290988	TRIM16L
ENSG00000023041	816.341	-1.07083	0.162483	-6.59043	4.39e-11	4e-10	ZDHHC6
ENSG00000165556	325.742	-1.07021	0.224144	-4.77467	1.8e-06	9.7e-06	CDX2
ENSG00000102996	1538.62	-1.06965	0.144798	-7.3872	1.5e-13	1.73e-12	MMP15
ENSG00000133706	1659.57	-1.06938	0.11953	-8.94654	3.67e-19	6.47e-18	LARS
ENSG00000100304	1790.51	-1.06851	0.0990147	-10.7915	3.78e-27	1.08e-25	TTLL12
ENSG00000173171	605.246	-1.06817	0.167088	-6.39284	1.63e-10	1.41e-09	MTX1
ENSG00000177106	2219.34	-1.06798	0.105652	-10.1085	5.07e-24	1.21e-22	EPS8L2
ENSG00000110881	815.156	-1.06776	0.143095	-7.46193	8.53e-14	1.01e-12	ASIC1
ENSG00000108604	3977.91	-1.06771	0.0770717	-13.8535	1.21e-43	7.65e-42	SMARCD2
ENSG00000186470	304.709	-1.06758	0.253803	-4.20636	2.6e-05	0.000117104	BTN3A2
ENSG00000172216	1437.99	-1.06702	0.136136	-7.8379	4.58e-15	5.97e-14	CEBPB
ENSG00000145198	191.463	-1.06701	0.311529	-3.42508	0.000614616	0.00213667	VWA5B2
ENSG00000105613	366.31	-1.06671	0.229949	-4.63888	3.5e-06	1.81e-05	MAST1
ENSG00000090863	4640.5	-1.06536	0.0730555	-14.5829	3.61e-48	2.63e-46	GLG1
ENSG00000161981	543.66	-1.06473	0.207457	-5.13229	2.86e-07	1.72e-06	SNRNP25
ENSG00000107140	392.36	-1.06374	0.215387	-4.93875	7.86e-07	4.45e-06	TESK1
ENSG00000058804	672.217	-1.0635	0.205047	-5.18664	2.14e-07	1.31e-06	NDC1
ENSG00000069998	1309.46	-1.06295	0.152015	-6.9924	2.7e-12	2.81e-11	HDHD5
ENSG00000101986	250.594	-1.06279	0.247901	-4.28716	1.81e-05	8.35e-05	ABCD1
ENSG00000140990	3848.47	-1.06273	0.0915269	-11.6112	3.62e-31	1.27e-29	NDUFB10
ENSG00000167157	532.988	-1.0616	0.201832	-5.25983	1.44e-07	8.97e-07	PRRX2
ENSG00000083444	3597.95	-1.0616	0.0849286	-12.4999	7.47e-36	3.3e-34	PLOD1
ENSG00000175792	2411.84	-1.05992	0.115087	-9.20965	3.27e-20	6.24e-19	RUVBL1
ENSG00000157014	315.65	-1.05932	0.224458	-4.71947	2.36e-06	1.25e-05	TATDN2
ENSG00000100297	3122.6	-1.05819	0.100631	-10.5155	7.33e-26	1.95e-24	MCM5
ENSG00000100296	892.493	-1.05774	0.139206	-7.59843	3e-14	3.68e-13	THOC5
ENSG00000100568	746.197	-1.05773	0.152875	-6.91894	4.55e-12	4.61e-11	VTI1B
ENSG00000054611	355.486	-1.05702	0.227788	-4.64036	3.48e-06	1.8e-05	TBC1D22A
ENSG00000102967	408.77	-1.05444	0.198027	-5.32474	1.01e-07	6.41e-07	DHODH
ENSG00000181396	873.195	-1.05402	0.143279	-7.35642	1.89e-13	2.16e-12	OGFOD3
ENSG00000168056	3170.75	-1.05377	0.102958	-10.235	1.38e-24	3.39e-23	LTBP3
ENSG00000160113	2325.68	-1.052	0.113997	-9.22829	2.75e-20	5.28e-19	NR2F6
ENSG00000015133	182.223	-1.05104	0.301191	-3.48962	0.000483716	0.00171798	CCDC88C
ENSG00000143870	1619.44	-1.04946	0.117162	-8.95736	3.33e-19	5.88e-18	PDIA6
ENSG00000170190	648.864	-1.04871	0.190915	-5.49307	3.95e-08	2.63e-07	SLC16A5
ENSG00000147383	389.293	-1.04764	0.239568	-4.37303	1.23e-05	5.81e-05	NSDHL
ENSG00000137106	1927.09	-1.04722	0.107018	-9.78542	1.3e-22	2.9e-21	GRHPR
ENSG00000092330	443.723	-1.04628	0.189076	-5.53366	3.14e-08	2.12e-07	TINF2
ENSG00000164051	514.615	-1.04605	0.1741	-6.0083	1.87e-09	1.46e-08	CCDC51
ENSG00000105640	24738.4	-1.04507	0.0587581	-17.7861	9.06e-71	1.32e-68	RPL18A
ENSG00000162777	247.382	-1.0443	0.302985	-3.44672	0.000567431	0.00198948	DENND2D
ENSG00000075239	1137.82	-1.04414	0.12954	-8.06034	7.61e-16	1.05e-14	ACAT1
ENSG00000244509	986.174	-1.04396	0.149731	-6.97224	3.12e-12	3.22e-11	APOBEC3C
ENSG00000176454	999.983	-1.04384	0.133774	-7.80296	6.05e-15	7.81e-14	LPCAT4
ENSG00000141034	221.738	-1.04349	0.277742	-3.75705	0.000171926	0.000673158	GID4
ENSG00000189067	1136.83	-1.0432	0.12792	-8.15513	3.49e-16	4.95e-15	LITAF
ENSG00000005156	309.162	-1.04296	0.24681	-4.22578	2.38e-05	0.00010804	LIG3
ENSG00000110811	673.886	-1.04234	0.159599	-6.53101	6.53e-11	5.88e-10	P3H3
ENSG00000144559	152.474	-1.04182	0.321141	-3.24412	0.00117816	0.0038492	TAMM41
ENSG00000197256	746.933	-1.04143	0.172597	-6.03385	1.6e-09	1.26e-08	KANK2
ENSG00000071082	16190.3	-1.04086	0.0680114	-15.3042	7.17e-53	5.89e-51	RPL31
ENSG00000172663	515.286	-1.0396	0.181007	-5.74343	9.28e-09	6.72e-08	TMEM134
ENSG00000103145	626.442	-1.03931	0.156696	-6.63266	3.3e-11	3.05e-10	HCFC1R1
ENSG00000124313	281.012	-1.0388	0.276422	-3.75801	0.000171271	0.000670875	IQSEC2
ENSG00000107798	345.662	-1.03879	0.259953	-3.99606	6.44e-05	0.00027191	LIPA
ENSG00000086232	2612.75	-1.03849	0.0883459	-11.7548	6.67e-32	2.43e-30	EIF2AK1
ENSG00000198695	12924.8	-1.03588	0.194402	-5.32857	9.9e-08	6.29e-07	MT-ND6
ENSG00000083807	237.229	-1.03546	0.271234	-3.81759	0.000134763	0.000539282	SLC27A5
ENSG00000107833	2569.06	-1.03421	0.106813	-9.68246	3.58e-22	7.75e-21	NPM3
ENSG00000173210	259.744	-1.03339	0.294583	-3.50796	0.000451565	0.00161625	ABLIM3
ENSG00000196975	897.33	-1.03322	0.157958	-6.5411	6.11e-11	5.5e-10	ANXA4
ENSG00000101138	600.909	-1.03307	0.179902	-5.74242	9.33e-09	6.76e-08	CSTF1
ENSG00000173821	520.967	-1.03203	0.183857	-5.61324	1.99e-08	1.38e-07	RNF213
ENSG00000102804	4213.34	-1.03108	0.0841074	-12.2591	1.5e-34	6.17e-33	TSC22D1
ENSG00000100711	544.692	-1.03083	0.179531	-5.74182	9.37e-09	6.78e-08	ZFYVE21
ENSG00000160796	911.553	-1.03034	0.14687	-7.01531	2.29e-12	2.4e-11	NBEAL2
ENSG00000014138	254.269	-1.03031	0.316409	-3.25627	0.00112886	0.00370158	POLA2
ENSG00000088888	1851.98	-1.02985	0.101444	-10.1519	3.25e-24	7.81e-23	MAVS
ENSG00000100983	1955.51	-1.02937	0.101427	-10.1489	3.35e-24	8.06e-23	GSS
ENSG00000267073	197.614	-1.02916	0.287781	-3.57621	0.000348611	0.00128002	AC005256.1
ENSG00000090924	233.352	-1.02821	0.281689	-3.65016	0.000262073	0.000986835	PLEKHG2
ENSG00000062038	2218.56	-1.0281	0.103969	-9.88851	4.67e-23	1.07e-21	CDH3
ENSG00000169783	424.695	-1.02799	0.21892	-4.69571	2.66e-06	1.39e-05	LINGO1
ENSG00000143353	261.915	-1.02774	0.294094	-3.49459	0.000474788	0.00169264	LYPLAL1
ENSG00000183978	412.542	-1.02759	0.211103	-4.86771	1.13e-06	6.26e-06	COA3
ENSG00000167526	56881.2	-1.02754	0.0592454	-17.3439	2.19e-67	2.74e-65	RPL13
ENSG00000079459	1638.62	-1.02743	0.129138	-7.95605	1.78e-15	2.38e-14	FDFT1
ENSG00000143633	279.179	-1.02708	0.262323	-3.91534	9.03e-05	0.000372554	C1orf131
ENSG00000152669	221.708	-1.02653	0.318146	-3.22661	0.00125265	0.00406933	CCNO
ENSG00000175221	1295.38	-1.02612	0.128505	-7.9851	1.4e-15	1.9e-14	MED16
ENSG00000135336	296.961	-1.02611	0.246205	-4.16773	3.08e-05	0.000137476	ORC3
ENSG00000114942	11446.7	-1.02607	0.0734847	-13.9631	2.62e-44	1.7e-42	EEF1B2
ENSG00000143061	311.684	-1.02402	0.240036	-4.26611	1.99e-05	9.12e-05	IGSF3
ENSG00000038210	179.326	-1.02342	0.307751	-3.32549	0.000882619	0.00296626	PI4K2B
ENSG00000041880	192.838	-1.02266	0.284986	-3.58843	0.000332669	0.00122698	PARP3
ENSG00000177239	1253.61	-1.02236	0.149333	-6.84616	7.59e-12	7.54e-11	MAN1B1
ENSG00000100426	432.356	-1.02152	0.204	-5.00743	5.52e-07	3.18e-06	ZBED4
ENSG00000196961	1918	-1.02076	0.117308	-8.70156	3.27e-18	5.38e-17	AP2A1
ENSG00000014919	954.945	-1.02046	0.140509	-7.26259	3.8e-13	4.25e-12	COX15
ENSG00000160446	1022.02	-1.01999	0.14699	-6.93918	3.94e-12	4.02e-11	ZDHHC12
ENSG00000029639	347.12	-1.01996	0.243548	-4.18794	2.81e-05	0.000126386	TFB1M
ENSG00000167996	11002.6	-1.01942	0.172533	-5.90855	3.45e-09	2.61e-08	FTH1
ENSG00000197892	171.002	-1.01801	0.309782	-3.28622	0.00101543	0.0033647	KIF13B
ENSG00000180340	313.439	-1.01795	0.249431	-4.08109	4.48e-05	0.000194591	FZD2
ENSG00000105722	1366.71	-1.01738	0.113533	-8.96116	3.21e-19	5.69e-18	ERF
ENSG00000248275	182.387	-1.01731	0.308967	-3.29261	0.000992626	0.00329665	TRIM52-AS1
ENSG00000128283	3134.89	-1.0173	0.109138	-9.32123	1.15e-20	2.27e-19	CDC42EP1
ENSG00000170854	299.286	-1.01712	0.248803	-4.08805	4.35e-05	0.00018946	RIOX2
ENSG00000160285	688.978	-1.01624	0.152861	-6.64811	2.97e-11	2.76e-10	LSS
ENSG00000178184	248.44	-1.01582	0.256486	-3.96052	7.48e-05	0.000312444	PARD6G
ENSG00000003249	1594.66	-1.01581	0.120242	-8.44806	2.96e-17	4.59e-16	DBNDD1
ENSG00000141556	1830.89	-1.01563	0.116752	-8.69907	3.35e-18	5.49e-17	TBCD
ENSG00000198276	756.609	-1.01503	0.178763	-5.67805	1.36e-08	9.63e-08	UCKL1
ENSG00000117984	1955.59	-1.01369	0.116082	-8.7325	2.49e-18	4.12e-17	CTSD
ENSG00000204628	37684.4	-1.01344	0.0550136	-18.4216	8.81e-76	1.53e-73	RACK1
ENSG00000160049	1138.07	-1.01227	0.135602	-7.46502	8.33e-14	9.86e-13	DFFA
ENSG00000108828	4264.91	-1.01222	0.0932125	-10.8593	1.8e-27	5.24e-26	VAT1
ENSG00000187961	918.76	-1.01181	0.136065	-7.43625	1.04e-13	1.22e-12	KLHL17
ENSG00000166441	25712.3	-1.01078	0.058344	-17.3244	3.08e-67	3.82e-65	RPL27A
ENSG00000153551	1412.99	-1.01036	0.115941	-8.71445	2.92e-18	4.81e-17	CMTM7
ENSG00000159259	502.721	-1.01035	0.187553	-5.38701	7.16e-08	4.63e-07	CHAF1B
ENSG00000135821	1811.19	-1.01034	0.109299	-9.24383	2.38e-20	4.59e-19	GLUL
ENSG00000146834	925.606	-1.01021	0.140276	-7.20161	5.95e-13	6.54e-12	MEPCE
ENSG00000152620	202.253	-1.01001	0.30898	-3.26886	0.00107983	0.00355502	NADK2
ENSG00000170892	1856.84	-1.00965	0.11239	-8.98341	2.63e-19	4.67e-18	TSEN34
ENSG00000179918	418.714	-1.00959	0.243483	-4.14645	3.38e-05	0.000149967	SEPHS2
ENSG00000112759	990.4	-1.0084	0.160085	-6.29915	2.99e-10	2.53e-09	SLC29A1
ENSG00000183605	653.692	-1.00828	0.170327	-5.91967	3.23e-09	2.45e-08	SFXN4
ENSG00000178096	288.737	-1.00539	0.234172	-4.29339	1.76e-05	8.13e-05	BOLA1
ENSG00000178773	2948.1	-1.00505	0.0874543	-11.4923	1.44e-30	4.91e-29	CPNE7
ENSG00000168944	172.793	-1.00493	0.31636	-3.17653	0.00149048	0.00475043	CEP120
ENSG00000158825	549.943	-1.00462	0.213224	-4.71158	2.46e-06	1.3e-05	CDA
ENSG00000126243	393.716	-1.00458	0.199659	-5.03149	4.87e-07	2.83e-06	LRFN3
ENSG00000099800	1422.7	-1.00421	0.123331	-8.14238	3.88e-16	5.47e-15	TIMM13
ENSG00000197448	1451.12	-1.00375	0.119649	-8.38911	4.9e-17	7.44e-16	GSTK1
ENSG00000198736	451.528	-1.00257	0.237608	-4.21942	2.45e-05	0.000110813	MSRB1
ENSG00000074964	264.369	-1.00254	0.311389	-3.21956	0.00128387	0.0041543	ARHGEF10L
ENSG00000140988	99005.1	-1.00238	0.0539008	-18.5967	3.42e-77	6.33e-75	RPS2
ENSG00000179526	917.085	-1.00149	0.135689	-7.38074	1.57e-13	1.81e-12	SHARPIN
ENSG00000158864	1774.99	-1.00137	0.102445	-9.77467	1.45e-22	3.21e-21	NDUFS2
ENSG00000072864	397.354	-1.00093	0.246797	-4.0557	5e-05	0.000215066	NDE1
ENSG00000119729	413.494	-1.00081	0.208786	-4.79346	1.64e-06	8.88e-06	RHOQ
ENSG00000179818	199.449	1.00031	0.278543	3.59121	0.000329143	0.00121516	PCBP1-AS1
ENSG00000198563	871.156	1.00104	0.148266	6.75164	1.46e-11	1.4e-10	DDX39B
ENSG00000174953	521.238	1.00119	0.225361	4.44259	8.89e-06	4.3e-05	DHX36
ENSG00000196505	212.224	1.00126	0.281817	3.55288	0.000381036	0.00138855	GDAP2
ENSG00000198356	2512.58	1.00164	0.107649	9.3047	1.34e-20	2.65e-19	GET3
ENSG00000169045	7170.94	1.00216	0.0783925	12.7839	2.02e-37	9.45e-36	HNRNPH1
ENSG00000154640	1295.12	1.00265	0.125652	7.97961	1.47e-15	1.98e-14	BTG3
ENSG00000184983	2778.59	1.00295	0.0842992	11.8975	1.22e-32	4.6e-31	NDUFA6
ENSG00000066322	2634.37	1.00313	0.0966409	10.38	3.06e-25	7.83e-24	ELOVL1
ENSG00000119328	322.515	1.00316	0.219273	4.57494	4.76e-06	2.41e-05	ABITRAM
ENSG00000146576	818.369	1.00347	0.175009	5.73382	9.82e-09	7.08e-08	C7orf26
ENSG00000157741	205.735	1.00372	0.30029	3.34249	0.000830315	0.00280646	UBN2
ENSG00000144840	336.63	1.00401	0.215236	4.66468	3.09e-06	1.61e-05	RABL3
ENSG00000101856	1902.43	1.00409	0.102751	9.772	1.48e-22	3.29e-21	PGRMC1
ENSG00000157181	419.829	1.00428	0.221801	4.52786	5.96e-06	2.96e-05	ODR4
ENSG00000130766	964.585	1.00453	0.178139	5.63905	1.71e-08	1.2e-07	SESN2
ENSG00000204160	1129.18	1.00505	0.143796	6.98941	2.76e-12	2.86e-11	ZDHHC18
ENSG00000197223	321.735	1.00688	0.233963	4.3036	1.68e-05	7.79e-05	C1D
ENSG00000069956	522.137	1.00917	0.194263	5.19488	2.05e-07	1.26e-06	MAPK6
ENSG00000112851	642.845	1.00923	0.19244	5.24442	1.57e-07	9.71e-07	ERBIN
ENSG00000185246	370.313	1.00935	0.227143	4.44369	8.84e-06	4.28e-05	PRPF39
ENSG00000160336	187.153	1.0101	0.28435	3.55232	0.000381854	0.00139127	ZNF761
ENSG00000059758	233.509	1.01167	0.259571	3.89747	9.72e-05	0.000398946	CDK17
ENSG00000064652	256.46	1.01277	0.269485	3.75817	0.000171159	0.000670573	SNX24
ENSG00000141027	859.836	1.01315	0.169861	5.96458	2.45e-09	1.89e-08	NCOR1
ENSG00000102057	198.909	1.01491	0.312226	3.25056	0.00115177	0.00377146	KCND1
ENSG00000184677	823.469	1.01549	0.198927	5.10487	3.31e-07	1.97e-06	ZBTB40
ENSG00000109270	426.766	1.01631	0.21827	4.65623	3.22e-06	1.67e-05	LAMTOR3
ENSG00000180263	190.346	1.01648	0.294657	3.44969	0.00056122	0.00197027	FGD6
ENSG00000113583	799.996	1.0171	0.154714	6.57405	4.9e-11	4.45e-10	C5orf15
ENSG00000075624	44859.2	1.0173	0.0647558	15.7097	1.3e-55	1.18e-53	ACTB
ENSG00000187522	510.096	1.01737	0.216103	4.7078	2.5e-06	1.32e-05	HSPA14
ENSG00000167283	4971.97	1.0175	0.0706089	14.4104	4.45e-47	3.11e-45	ATP5MG
ENSG00000242259	505.316	1.01785	0.213496	4.76755	1.86e-06	1e-05	C22orf39
ENSG00000123268	349.32	1.01898	0.208006	4.89878	9.64e-07	5.4e-06	ATF1
ENSG00000152102	2684.32	1.01904	0.0998805	10.2026	1.93e-24	4.7e-23	FAM168B
ENSG00000143033	677.973	1.02011	0.170701	5.976	2.29e-09	1.76e-08	MTF2
ENSG00000112763	311.528	1.02043	0.22417	4.55204	5.31e-06	2.67e-05	BTN2A1
ENSG00000026652	399.397	1.02102	0.197618	5.16663	2.38e-07	1.45e-06	AGPAT4
ENSG00000115295	270.744	1.02189	0.238829	4.27874	1.88e-05	8.64e-05	CLIP4
ENSG00000162775	354.45	1.02241	0.225459	4.53479	5.77e-06	2.88e-05	RBM15
ENSG00000106617	475.237	1.02263	0.185409	5.51551	3.48e-08	2.33e-07	PRKAG2
ENSG00000118007	239.731	1.0236	0.272965	3.74992	0.00017689	0.00069059	STAG1
ENSG00000169604	749.183	1.02405	0.163725	6.2547	3.98e-10	3.32e-09	ANTXR1
ENSG00000173744	864.876	1.02467	0.168179	6.09275	1.11e-09	8.88e-09	AGFG1
ENSG00000205155	820.956	1.02546	0.184755	5.55037	2.85e-08	1.94e-07	PSENEN
ENSG00000132466	1585.48	1.02633	0.130849	7.84358	4.38e-15	5.72e-14	ANKRD17
ENSG00000268205	345.165	1.02711	0.241334	4.25599	2.08e-05	9.51e-05	AC005261.1
ENSG00000198960	278.668	1.0294	0.253766	4.05649	4.98e-05	0.000214389	ARMCX6
ENSG00000100401	4658.15	1.02962	0.0925823	11.1211	9.9e-29	3.09e-27	RANGAP1
ENSG00000174373	156.796	1.02976	0.30899	3.33266	0.000860197	0.0028976	RALGAPA1
ENSG00000144597	546.882	1.03076	0.18941	5.44197	5.27e-08	3.46e-07	EAF1
ENSG00000137210	1387.19	1.03114	0.138506	7.44475	9.71e-14	1.14e-12	TMEM14B
ENSG00000175866	2655.5	1.03166	0.112202	9.1947	3.76e-20	7.13e-19	BAIAP2
ENSG00000114209	749.195	1.03213	0.151441	6.81539	9.4e-12	9.24e-11	PDCD10
ENSG00000077782	1475.32	1.03311	0.116699	8.85276	8.54e-19	1.46e-17	FGFR1
ENSG00000105948	171.171	1.03355	0.316573	3.26482	0.00109533	0.00360227	TTC26
ENSG00000075292	1290.57	1.03381	0.127677	8.0971	5.63e-16	7.86e-15	ZNF638
ENSG00000166024	247.017	1.03392	0.272671	3.79184	0.000149537	0.000593248	R3HCC1L
ENSG00000115520	545.075	1.03441	0.184013	5.6214	1.89e-08	1.32e-07	COQ10B
ENSG00000143942	174.243	1.03509	0.294188	3.51845	0.00043408	0.00155899	CHAC2
ENSG00000037241	900.185	1.03522	0.1703	6.07877	1.21e-09	9.63e-09	RPL26L1
ENSG00000109133	1089.92	1.03532	0.162268	6.3803	1.77e-10	1.53e-09	TMEM33
ENSG00000172667	336.368	1.03557	0.244097	4.24246	2.21e-05	0.000100674	ZMAT3
ENSG00000196776	669.717	1.03646	0.173439	5.97591	2.29e-09	1.76e-08	CD47
ENSG00000151923	3149.64	1.03648	0.105746	9.80156	1.11e-22	2.48e-21	TIAL1
ENSG00000178038	499.384	1.03685	0.198819	5.21506	1.84e-07	1.13e-06	ALS2CL
ENSG00000170791	475.067	1.03739	0.198763	5.21923	1.8e-07	1.11e-06	CHCHD7
ENSG00000119707	5037.4	1.0375	0.108379	9.57295	1.04e-21	2.19e-20	RBM25
ENSG00000151287	348.052	1.03833	0.277344	3.74383	0.000181237	0.000705229	TEX30
ENSG00000164162	320.619	1.03838	0.228755	4.53929	5.64e-06	2.82e-05	ANAPC10
ENSG00000196459	289.083	1.03885	0.238307	4.35929	1.3e-05	6.17e-05	TRAPPC2
ENSG00000007168	1977.5	1.03962	0.132433	7.85021	4.15e-15	5.43e-14	PAFAH1B1
ENSG00000067533	862.406	1.04062	0.202921	5.12819	2.93e-07	1.76e-06	RRP15
ENSG00000120137	552.799	1.04063	0.182164	5.71259	1.11e-08	7.98e-08	PANK3
ENSG00000127914	840.124	1.04072	0.188249	5.52842	3.23e-08	2.18e-07	AKAP9
ENSG00000148339	361.369	1.04073	0.223418	4.65823	3.19e-06	1.66e-05	SLC25A25
ENSG00000135318	1458.97	1.04122	0.12316	8.45419	2.81e-17	4.37e-16	NT5E
ENSG00000042429	670.195	1.04165	0.168093	6.19686	5.76e-10	4.74e-09	MED17
ENSG00000143751	373.983	1.04186	0.225522	4.61978	3.84e-06	1.97e-05	SDE2
ENSG00000160908	452.976	1.04252	0.219319	4.75343	2e-06	1.07e-05	ZNF394
ENSG00000141644	828.022	1.04256	0.152275	6.84655	7.57e-12	7.53e-11	MBD1
ENSG00000140948	1027.02	1.04272	0.141825	7.35216	1.95e-13	2.22e-12	ZCCHC14
ENSG00000198612	818.119	1.04275	0.161652	6.45058	1.11e-10	9.81e-10	COPS8
ENSG00000141458	814.229	1.04299	0.167363	6.2319	4.61e-10	3.82e-09	NPC1
ENSG00000152484	697.838	1.04336	0.160736	6.49115	8.52e-11	7.59e-10	USP12
ENSG00000173207	2734.75	1.04347	0.109103	9.56405	1.13e-21	2.38e-20	CKS1B
ENSG00000204954	374.54	1.04405	0.224229	4.65616	3.22e-06	1.67e-05	C12orf73
ENSG00000181381	355.509	1.04444	0.228367	4.57351	4.8e-06	2.42e-05	DDX60L
ENSG00000068383	316.538	1.0445	0.22001	4.7475	2.06e-06	1.1e-05	INPP5A
ENSG00000157106	644.239	1.04704	0.186527	5.61337	1.98e-08	1.38e-07	SMG1
ENSG00000166881	313.4	1.04732	0.249176	4.20315	2.63e-05	0.000118578	NEMP1
ENSG00000115355	649.326	1.04757	0.219812	4.76574	1.88e-06	1.01e-05	CCDC88A
ENSG00000215717	372.116	1.04819	0.246289	4.25594	2.08e-05	9.51e-05	TMEM167B
ENSG00000140307	1349.94	1.04839	0.127384	8.23014	1.87e-16	2.73e-15	GTF2A2
ENSG00000185088	3202.98	1.04915	0.0968678	10.8308	2.46e-27	7.11e-26	RPS27L
ENSG00000004866	371.141	1.04936	0.230445	4.5536	5.27e-06	2.65e-05	ST7
ENSG00000282826	404.442	1.0497	0.23458	4.47482	7.65e-06	3.73e-05	FRG1CP
ENSG00000168394	1308.49	1.05053	0.129052	8.14033	3.94e-16	5.56e-15	TAP1
ENSG00000136021	490.274	1.05067	0.186245	5.64131	1.69e-08	1.18e-07	SCYL2
ENSG00000129932	807.88	1.05076	0.163516	6.42605	1.31e-10	1.15e-09	DOHH
ENSG00000106299	485.198	1.05122	0.181277	5.79897	6.67e-09	4.9e-08	WASL
ENSG00000174021	3977.77	1.05177	0.109384	9.61539	6.88e-22	1.47e-20	GNG5
ENSG00000176014	2659.36	1.05178	0.101398	10.3728	3.3e-25	8.42e-24	TUBB6
ENSG00000082781	2702.72	1.05206	0.106796	9.85111	6.78e-23	1.53e-21	ITGB5
ENSG00000144848	1147.81	1.05258	0.128958	8.16214	3.29e-16	4.68e-15	ATG3
ENSG00000110218	281.769	1.05281	0.238756	4.40954	1.04e-05	4.97e-05	PANX1
ENSG00000119820	621.697	1.05291	0.193571	5.4394	5.35e-08	3.51e-07	YIPF4
ENSG00000076321	187.677	1.05297	0.30169	3.49022	0.000482615	0.00171517	KLHL20
ENSG00000075539	365.684	1.05303	0.271221	3.88254	0.00010337	0.000421971	FRYL
ENSG00000052841	871.158	1.05613	0.164359	6.42575	1.31e-10	1.15e-09	TTC17
ENSG00000187325	339.548	1.05691	0.240191	4.40029	1.08e-05	5.17e-05	TAF9B
ENSG00000136631	620.101	1.05741	0.160503	6.58809	4.46e-11	4.06e-10	VPS45
ENSG00000166004	168.354	1.05746	0.296634	3.56485	0.000364067	0.00133289	CEP295
ENSG00000170234	203.745	1.05798	0.302475	3.49773	0.000469228	0.00167408	PWWP2A
ENSG00000000419	1362.58	1.05813	0.13493	7.84202	4.43e-15	5.79e-14	DPM1
ENSG00000142546	4488.54	1.05845	0.101295	10.4492	1.48e-25	3.82e-24	NOSIP
ENSG00000136816	360.905	1.05856	0.222043	4.76736	1.87e-06	1e-05	TOR1B
ENSG00000171169	280.411	1.05867	0.267682	3.95497	7.65e-05	0.00031923	NAIF1
ENSG00000156256	856.494	1.05892	0.167201	6.3332	2.4e-10	2.05e-09	USP16
ENSG00000072401	334.807	1.05916	0.247082	4.28667	1.81e-05	8.36e-05	UBE2D1
ENSG00000080815	993.829	1.0593	0.138915	7.62554	2.43e-14	3e-13	PSEN1
ENSG00000120306	1734.42	1.05935	0.132093	8.01974	1.06e-15	1.45e-14	CYSTM1
ENSG00000168140	244.29	1.05991	0.267031	3.96924	7.21e-05	0.000302302	VASN
ENSG00000172331	231.786	1.06085	0.276305	3.83942	0.000123324	0.000497087	BPGM
ENSG00000198258	4790.07	1.06096	0.079906	13.2776	3.12e-40	1.67e-38	UBL5
ENSG00000175376	822.458	1.06125	0.146661	7.23607	4.62e-13	5.12e-12	EIF1AD
ENSG00000113593	485.73	1.06142	0.18891	5.61868	1.92e-08	1.34e-07	PPWD1
ENSG00000185404	360.086	1.0629	0.219718	4.83759	1.31e-06	7.21e-06	SP140L
ENSG00000125971	3158.03	1.06331	0.0911564	11.6646	1.93e-31	6.86e-30	DYNLRB1
ENSG00000106537	511.495	1.0647	0.209391	5.08474	3.68e-07	2.18e-06	TSPAN13
ENSG00000010810	475.378	1.06556	0.196718	5.4167	6.07e-08	3.96e-07	FYN
ENSG00000167772	565.962	1.06707	0.245739	4.34228	1.41e-05	6.62e-05	ANGPTL4
ENSG00000028116	276.557	1.06724	0.274853	3.88294	0.000103203	0.000421379	VRK2
ENSG00000176853	942.943	1.06796	0.142541	7.49229	6.77e-14	8.07e-13	FAM91A1
ENSG00000115421	258.07	1.06796	0.295653	3.6122	0.000303607	0.00112927	PAPOLG
ENSG00000114127	282.242	1.06824	0.273672	3.90334	9.49e-05	0.000389735	XRN1
ENSG00000136682	363.738	1.06879	0.234302	4.56157	5.08e-06	2.55e-05	CBWD2
ENSG00000198315	416.205	1.06898	0.215548	4.95935	7.07e-07	4.02e-06	ZKSCAN8
ENSG00000114573	780.159	1.07007	0.181798	5.88602	3.96e-09	2.98e-08	ATP6V1A
ENSG00000127990	307.145	1.07096	0.282544	3.79041	0.000150402	0.000596177	SGCE
ENSG00000033100	549.295	1.07098	0.176992	6.05102	1.44e-09	1.13e-08	CHPF2
ENSG00000108061	461.109	1.07101	0.280562	3.81739	0.000134873	0.000539606	SHOC2
ENSG00000166579	670.203	1.07104	0.168229	6.36655	1.93e-10	1.67e-09	NDEL1
ENSG00000161010	430.941	1.07119	0.206734	5.18146	2.2e-07	1.34e-06	MRNIP
ENSG00000154114	164.002	1.07133	0.326558	3.28068	0.00103558	0.00342426	TBCEL
ENSG00000140511	445.16	1.0723	0.217677	4.9261	8.39e-07	4.74e-06	HAPLN3
ENSG00000081014	182.216	1.07235	0.311057	3.44744	0.000565935	0.00198498	AP4E1
ENSG00000136738	346.447	1.07293	0.242344	4.42731	9.54e-06	4.6e-05	STAM
ENSG00000131504	3784.24	1.07345	0.0881835	12.1729	4.33e-34	1.76e-32	DIAPH1
ENSG00000213390	901.798	1.07389	0.143842	7.46576	8.28e-14	9.81e-13	ARHGAP19
ENSG00000232112	3534.3	1.07439	0.11903	9.02617	1.78e-19	3.19e-18	TMA7
ENSG00000149187	2449.41	1.0753	0.110946	9.69214	3.26e-22	7.07e-21	CELF1
ENSG00000159579	352.728	1.07549	0.226887	4.74022	2.13e-06	1.14e-05	RSPRY1
ENSG00000077721	1404.27	1.07565	0.121118	8.88102	6.62e-19	1.14e-17	UBE2A
ENSG00000240024	147.623	1.0758	0.330878	3.25134	0.00114861	0.0037624	LINC00888
ENSG00000179094	2346.02	1.07608	0.102595	10.4886	9.74e-26	2.57e-24	PER1
ENSG00000136527	4022.29	1.07638	0.0843592	12.7595	2.76e-37	1.28e-35	TRA2B
ENSG00000117500	740.539	1.07706	0.145178	7.41887	1.18e-13	1.38e-12	TMED5
ENSG00000177370	1128.19	1.07708	0.156385	6.88737	5.68e-12	5.72e-11	TIMM22
ENSG00000106052	1437.13	1.07812	0.109693	9.82857	8.48e-23	1.91e-21	TAX1BP1
ENSG00000170502	537.807	1.07865	0.225231	4.7891	1.68e-06	9.06e-06	NUDT9
ENSG00000170860	2303.82	1.07916	0.117129	9.21348	3.16e-20	6.04e-19	LSM3
ENSG00000159256	251.746	1.0798	0.290666	3.71491	0.000203273	0.00078187	MORC3
ENSG00000138032	398.432	1.0811	0.227739	4.74712	2.06e-06	1.1e-05	PPM1B
ENSG00000113734	452.932	1.08117	0.249335	4.33621	1.45e-05	6.79e-05	BNIP1
ENSG00000126775	240.384	1.08146	0.321564	3.36312	0.000770673	0.00262521	ATG14
ENSG00000005889	208.788	1.08183	0.286246	3.77938	0.000157218	0.000621109	ZFX
ENSG00000112972	382.445	1.08232	0.230116	4.70337	2.56e-06	1.35e-05	HMGCS1
ENSG00000137947	827.86	1.08259	0.159168	6.80155	1.03e-11	1.01e-10	GTF2B
ENSG00000142910	1987.64	1.08309	0.108355	9.99572	1.59e-23	3.71e-22	TINAGL1
ENSG00000172380	1256.06	1.0831	0.137336	7.88647	3.11e-15	4.11e-14	GNG12
ENSG00000167193	1881.71	1.08333	0.0977988	11.0772	1.62e-28	4.98e-27	CRK
ENSG00000104131	1946.83	1.08419	0.108353	10.0061	1.43e-23	3.34e-22	EIF3J
ENSG00000152359	273.19	1.08495	0.247648	4.38103	1.18e-05	5.62e-05	POC5
ENSG00000107951	622.783	1.08566	0.213427	5.0868	3.64e-07	2.16e-06	MTPAP
ENSG00000065243	526.174	1.08602	0.190539	5.69974	1.2e-08	8.56e-08	PKN2
ENSG00000110092	8948.14	1.08651	0.0793499	13.6926	1.12e-42	6.91e-41	CCND1
ENSG00000176124	252.156	1.08732	0.279736	3.88695	0.000101513	0.00041502	DLEU1
ENSG00000126012	2170.83	1.08777	0.114247	9.52127	1.71e-21	3.54e-20	KDM5C
ENSG00000096070	408.712	1.08792	0.248825	4.37222	1.23e-05	5.83e-05	BRPF3
ENSG00000116095	283.92	1.08798	0.263772	4.12471	3.71e-05	0.000163586	PLEKHA3
ENSG00000134851	813.285	1.08822	0.147795	7.36301	1.8e-13	2.06e-12	TMEM165
ENSG00000112031	240.274	1.0888	0.267469	4.07074	4.69e-05	0.000202793	MTRF1L
ENSG00000177731	5473.41	1.08926	0.0705357	15.4426	8.46e-54	7.13e-52	FLII
ENSG00000185728	623.005	1.08932	0.205346	5.30481	1.13e-07	7.11e-07	YTHDF3
ENSG00000151689	718.145	1.0902	0.170031	6.41174	1.44e-10	1.25e-09	INPP1
ENSG00000081026	167.267	1.09098	0.326039	3.34618	0.000819325	0.00277328	MAGI3
ENSG00000235954	242.846	1.09125	0.274775	3.97144	7.14e-05	0.000299792	TTC28-AS1
ENSG00000174842	216.143	1.0925	0.287078	3.80558	0.000141474	0.00056458	GLMN
ENSG00000100058	259.802	1.09258	0.298769	3.65693	0.000255258	0.000962903	CRYBB2P1
ENSG00000143771	1197.21	1.09341	0.131481	8.31611	9.09e-17	1.36e-15	CNIH4
ENSG00000118496	277.242	1.09348	0.250991	4.35667	1.32e-05	6.23e-05	FBXO30
ENSG00000173145	578.15	1.0935	0.185	5.91083	3.4e-09	2.58e-08	NOC3L
ENSG00000123728	377.644	1.09376	0.255157	4.28662	1.81e-05	8.36e-05	RAP2C
ENSG00000189410	312.265	1.09472	0.297514	3.67957	0.000233627	0.000888223	SH2D5
ENSG00000108848	6742.18	1.09488	0.239584	4.56995	4.88e-06	2.46e-05	LUC7L3
ENSG00000064651	463.633	1.09543	0.203151	5.39218	6.96e-08	4.51e-07	SLC12A2
ENSG00000086619	175.089	1.09605	0.293913	3.72917	0.000192109	0.000744009	ERO1B
ENSG00000086065	1550.51	1.09626	0.123156	8.90138	5.52e-19	9.6e-18	CHMP5
ENSG00000133818	936.085	1.09667	0.133329	8.22533	1.95e-16	2.83e-15	RRAS2
ENSG00000171488	247.994	1.09702	0.291898	3.75821	0.000171134	0.000670573	LRRC8C
[truncated: 58,676 more rows]

## Sheet: S Tab 2 A5 Splicing
ID	GeneID	geneSymbol	chr	strand	longExonStart_0base	longExonEnd	shortES	shortEE	flankingES	flankingEE	ID	IC_SAMPLE_1	SC_SAMPLE_1	IC_SAMPLE_2	SC_SAMPLE_2	IncFormLen	SkipFormLen	PValue	FDR	IncLevel1	IncLevel2	IncLevelDifference	dPSI	Abs dPSI
1237	ENSG00000158793	NIT1	1	+	161118117	161118225	161118117	161118178	161118785	161118881	1237	0,11,0	76,30,24	39,20,26	6,3,3	120	73	0	0	0.0,0.182,0.0	0.798,0.802,0.841	-0.753	-75.3	75.3
124	ENSG00000127564	PKMYT1	16	-	2973133	2973215	2973137	2973215	2972850	2973064	124	13,40,28	46,105,55	5,1,2	207130125	77	73	0	0	0.211,0.265,0.326	0.022,0.007,0.015	0.253	25.3	25.3
1262	ENSG00000132429	POPDC3	6	-	105161424	105162160	105161795	105162160	105159710	105159819	1262	0,0,0	12,29,48	1,5,12	0,0,0	444	73	0	0	0.0,0.0,0.0	1.0,1.0,1.0	-1	-100	100
1695	ENSG00000172809	RPL38	17	+	74203581	74203790	74203581	74203710	74203917	74203958	1695	43,29,59	397778495	122,170,55	432423339	153	73	0	0	0.049,0.017,0.054	0.119,0.161,0.072	-0.077	-7.7	7.7
231	ENSG00000198755	RPL10A	6	+	35468946	35469285	35468946	35469027	35469380	35469529	231	55712181011	360860355863	1202844937	165714591462	331	73	0	0	0.033,0.043,0.037	0.138,0.113,0.124	-0.087	-8.7	8.7
2680	ENSG00000163479	SSR2	1	-	156018131	156018368	156018269	156018368	156014960	156015069	2680	35,90,34	397613547	227137117	599527509	211	73	0	0	0.03,0.048,0.021	0.116,0.083,0.074	-0.058	-5.8	5.8
2684	ENSG00000198931	APRT	16	-	88811496	88811656	88811549	88811656	88810069	88810148	2684	43,118,84	0,0,9	21,31,17	28,17,35	126	73	0	0	1.0,1.0,0.844	0.303,0.514,0.22	0.602	60.2	60.2
2856	ENSG00000135506	OS9	12	+	57718992	57720263	57718992	57719182	57720405	57720518	2856	229422489	50114101	523226280	336183180	1154	73	0	0	0.225,0.19,0.234	0.09,0.072,0.09	0.132	13.2	13.2
3070	ENSG00000196465	MYL6B	12	+	56155418	56155597	56155418	56155493	56157467	56157545	3070	614827676	0,0,0	287129189	23,7,4	177	73	0	0	1.0,1.0,1.0	0.837,0.884,0.951	0.109	10.9	10.9
3276	ENSG00000126214	KLC1	14	+	103679407	103679545	103679407	103679518	103687080	103687211	3276	123,106,84	0,5,2	138,79,94	80,78,52	100	73	0	0	1.0,0.939,0.968	0.557,0.425,0.569	0.452	45.2	45.2
417	ENSG00000102317	RBM3	X	+	48575560	48576083	48575560	48575667	48576313	48576419	417	4,38,23	225564289	98,64,58	117122109	489	73	0	0	0.003,0.01,0.012	0.111,0.073,0.074	-0.078	-7.8	7.8
5059	ENSG00000120533	ENY2	8	+	109334323	109334471	109334323	109334402	109336127	109336204	5059	193295270	63,97,80	1034866721	95,95,78	142	73	0	0	0.612,0.61,0.634	0.848,0.824,0.826	-0.214	-21.4	21.4
5062	ENSG00000120533	ENY2	8	+	109334323	109334474	109334323	109334402	109336127	109336204	5062	486668556	63,97,80	232419511607	95,95,78	145	73	0	0	0.795,0.776,0.778	0.925,0.912,0.912	-0.133	-13.3	13.3
5265	ENSG00000122406	RPL5	1	+	92837455	92837633	92837455	92837630	92840550	92840639	5265	410255476613	194202386	441541544039	55,18,7	76	73	0	0	0.953,0.963,0.943	0.987,0.996,0.998	-0.041	-4.1	4.1
5316	ENSG00000178982	EIF3K	19	+	38619094	38619302	38619094	38619223	38620336	38620435	5316	227449258	0,11,0	411219174	58,16,33	152	73	0	0	1.0,0.951,1.0	0.773,0.868,0.717	0.198	19.8	19.8
5924	ENSG00000090621	PABPC4	1	-	39571096	39571349	39571233	39571349	39569862	39570002	5924	8,19,14	54130112	49,89,141	56,43,45	210	73	0	0	0.049,0.048,0.042	0.233,0.418,0.521	-0.344	-34.4	34.4
5977	ENSG00000111906	HDDC2	6	-	125301848	125302078	125302032	125302078	125300537	125300659	5977	228207296	7,0,20	119144134	31,66,38	257	73	0	0	0.902,1.0,0.808	0.522,0.383,0.5	0.435	43.5	43.5
59	ENSG00000197958	RPL12	9	-	127451049	127451405	127451280	127451405	127450730	127450804	59	401724669	59721116911452	1041610631	227723721846	304	73	0	0	0.016,0.015,0.014	0.099,0.058,0.076	-0.063	-6.3	6.3
6219	ENSG00000020129	NCDN	1	+	35558155	35558484	35558155	35558223	35559106	35559247	6219	0,0,0	3,13,7	22,12,12	0,0,0	334	73	0	0	0.0,0.0,0.0	1.0,1.0,1.0	-1	-100	100
6228	ENSG00000171763	SPATA5L1	15	+	45415586	45415809	45415586	45415779	45417268	45417399	6228	0,0,0	10,72,8	24,8,36	10,14,16	103	73	0	0	0.0,0.0,0.0	0.63,0.288,0.615	-0.511	-51.1	51.1
6596	ENSG00000114021	NIT2	3	+	100345584	100345730	100345584	100345678	100346180	100346255	6596	14,0,0	95144138	38,49,19	55,76,70	125	73	0	0	0.079,0.0,0.0	0.287,0.274,0.137	-0.206	-20.6	20.6
6	ENSG00000166012	TAF1D	11	-	93736140	93736304	93736289	93736304	93734624	93734660	6	317375428	0,0,0	1047717732	69,40,27	222	73	0	0	1.0,1.0,1.0	0.833,0.855,0.899	0.138	13.8	13.8
7439	ENSG00000032389	TSSC1	2	-	3196801	3197017	3196880	3197017	3194082	3194166	7439	11,35,17	49,68,57	0,0,0	87,30,55	152	73	0	0	0.097,0.198,0.125	0.0,0.0,0.0	0.14	14	14
7734	ENSG00000215472	RPL17-C18orf32	18	-	49492257	49492479	49492457	49492479	49491516	49491584	7734	163365244	168528312127	395311314	148311851010	273	73	0	0	0.025,0.033,0.03	0.066,0.066,0.077	-0.04	-4	4
8317	ENSG00000101365	IDH3B	20	-	2658637	2658859	2658758	2658859	2658394	2658522	8317	292373479	36,32,55	836756497	16,10,1	194	73	0	0	0.753,0.814,0.766	0.952,0.966,0.995	-0.193	-19.3	19.3
8768	ENSG00000089009	RPL6	12	-	112409405	112409641	112409586	112409641	112408489	112408656	8768	49,107,58	99327399	174218152	240241159	254	73	0	0	0.125,0.086,0.04	0.172,0.206,0.216	-0.114	-11.4	11.4
965	ENSG00000186716	BCR	22	+	23311696	23311918	23311696	23311836	23312886	23313021	965	0,0,0	30,59,94	19,38,49	12,37,49	155	73	0	0	0.0,0.0,0.0	0.427,0.326,0.32	-0.358	-35.8	35.8
1870	ENSG00000197989	SNHG12	1	-	28580424	28580646	28580559	28580646	28579911	28579981	1870	18,19,43	108157182	443169256	259290277	208	73	1.11022e-16	1.83545e-14	0.055,0.041,0.077	0.375,0.17,0.245	-0.206	-20.6	20.6
5060	ENSG00000120533	ENY2	8	+	109334323	109334534	109334323	109334402	109336127	109336204	5060	271447382	63,97,80	14781092973	95,95,78	205	73	1.11022e-16	1.83545e-14	0.605,0.621,0.63	0.847,0.804,0.816	-0.204	-20.4	20.4
5142	ENSG00000161996	WDR90	16	+	662672	663064	662672	662844	665678	665801	5142	0,35,18	19,18,13	15,29,16	0,0,0	293	73	1.11022e-16	1.83545e-14	0.0,0.326,0.256	1.0,1.0,1.0	-0.806	-80.6	80.6
7736	ENSG00000215472	RPL17-C18orf32	18	-	49492274	49492479	49492457	49492479	49491516	49491584	7736	204461313	168528312127	431377358	148311851010	256	73	1.11022e-16	1.83545e-14	0.033,0.044,0.04	0.077,0.083,0.092	-0.045	-4.5	4.5
3061	ENSG00000137106	GRHPR	9	+	37422713	37422833	37422713	37422805	37424844	37424971	3061	181256184	14,53,22	104108113	0,0,0	101	73	3.33067e-16	5.17263e-14	0.903,0.777,0.858	1.0,1.0,1.0	-0.154	-15.4	15.4
5677	ENSG00000105373	GLTSCR2	19	+	47755783	47756005	47755783	47755822	47756527	47756604	5677	48124118	59612141165	58,65,83	321220195	256	73	3.33067e-16	5.17263e-14	0.022,0.028,0.028	0.049,0.078,0.108	-0.052	-5.2	5.2
1661	ENSG00000122566	HNRNPA2B1	7	-	26192300	26192528	26192494	26192528	26190992	26191128	1661	47154104	63,97,79	220219205	611579689	267	73	4.44089e-16	6.69399e-14	0.169,0.303,0.265	0.09,0.094,0.075	0.159	15.9	15.9
4742	ENSG00000169689	STRA13	17	-	82019292	82019381	82019307	82019381	82018702	82019219	4742	361800523	33,61,49	855764721	10,25,13	88	73	6.66134e-16	9.7541e-14	0.901,0.916,0.899	0.986,0.962,0.979	-0.07	-7	7
3876	ENSG00000084072	PPIE	1	+	39745374	39748767	39745374	39745498	39748902	39749088	3876	21,42,17	111124148	158146214	157159150	3342	73	7.77156e-16	1.10637e-13	0.004,0.007,0.003	0.022,0.02,0.03	-0.019	-1.9	1.9
670	ENSG00000159069	FBXW5	9	-	136941754	136942466	136942045	136942466	136941536	136941684	670	41,66,108	55134109	176125116	65,41,59	364	73	1.66533e-15	2.30671e-13	0.13,0.09,0.166	0.352,0.379,0.283	-0.209	-20.9	20.9
4304	ENSG00000072195	SPEG	2	+	219443107	219443637	219443107	219443150	219444652	219444742	4304	6,31,30	0,0,0	0,8,22	4,9,4	560	73	2.33147e-15	3.14441e-13	1.0,1.0,1.0	0.0,0.104,0.418	0.826	82.6	82.6
593	ENSG00000105486	LIG1	19	-	48120166	48121322	48121169	48121322	48119136	48119190	593	15,49,27	106139123	109,138,16	20,74,36	1076	73	3.55271e-15	4.66863e-13	0.01,0.023,0.015	0.27,0.112,0.029	-0.121	-12.1	12.1
7033	ENSG00000071054	MAP4K4	2	+	101887087	101887261	101887087	101887237	101887777	101887937	7033	14,3,23	20,27,28	0,0,0	42,93,75	97	73	4.10783e-15	5.26315e-13	0.345,0.077,0.382	0.0,0.0,0.0	0.268	26.8	26.8
1649	ENSG00000164896	FASTK	7	-	151076912	151077236	151077100	151077236	151076625	151076832	1649	284549409	3,8,4	204236118	18,28,33	261	73	4.66294e-15	5.82867e-13	0.964,0.95,0.966	0.76,0.702,0.5	0.306	30.6	30.6
5730	ENSG00000060138	YBX3	12	-	10709907	10713333	10713210	10713333	10704054	10704148	5730	8631154915	237502325	167016091708	230275325	3376	73	5.88418e-15	7.1801e-13	0.073,0.047,0.057	0.136,0.112,0.102	-0.058	-5.8	5.8
5243	ENSG00000161249	DMKN	19	-	35498597	35498763	35498715	35498763	35497219	35497538	5243	139,93,158	197345314	365281249	328224158	191	73	9.88098e-15	1.17768e-12	0.212,0.093,0.161	0.298,0.324,0.376	-0.177	-17.7	17.7
362	ENSG00000011243	AKAP8L	19	-	15398629	15399410	15399301	15399410	15397713	15397855	362	69,80,92	113166135	66,89,58	453283338	745	73	1.03251e-14	1.20264e-12	0.056,0.045,0.063	0.014,0.03,0.017	0.034	3.4	3.4
7615	ENSG00000108344	PSMD3	17	+	39995423	39995623	39995423	39995527	39996182	39996338	7615	1,5,8	340461448	49,28,72	709525588	169	73	1.28786e-14	1.46673e-12	0.001,0.005,0.008	0.029,0.023,0.05	-0.029	-2.9	2.9
3442	ENSG00000160948	VPS28	8	-	144425921	144426063	144426025	144426063	144425660	144425772	3442	12,28,59	276395478	79,58,72	358196235	177	73	1.72085e-14	1.91725e-12	0.018,0.028,0.048	0.083,0.109,0.112	-0.07	-7	7
3071	ENSG00000196465	MYL6B	12	+	56155418	56155592	56155418	56155493	56157467	56157545	3071	84311731009	0,0,0	446251305	23,7,4	172	73	2.13163e-14	2.27596e-12	1.0,1.0,1.0	0.892,0.938,0.97	0.067	6.7	6.7
5922	ENSG00000090621	PABPC4	1	-	39563526	39563741	39563613	39563741	39562072	39562203	5922	42,8,2	0,0,0	44,6,0	14,11,28	160	73	2.09832e-14	2.27596e-12	1.0,1.0,1.0	0.589,0.199,0.0	0.737	73.7	73.7
6514	ENSG00000141030	COPS3	17	-	17270757	17271008	17270895	17271008	17267884	17267977	6514	26,63,47	0,0,0	69,30,26	18,6,12	211	73	3.64153e-14	3.80874e-12	1.0,1.0,1.0	0.57,0.634,0.428	0.456	45.6	45.6
2411	ENSG00000204387	C6orf48	6	+	31835413	31835455	31835413	31835451	31837235	31837435	2411	10,35,34	171373395	3,5,2	314272375	77	73	3.73035e-14	3.82361e-12	0.053,0.082,0.075	0.009,0.017,0.005	0.06	6	6
2960	ENSG00000166145	SPINT1	15	+	40853710	40853929	40853710	40853881	40854059	40854086	2960	55145109	68118104	243151138	65,36,51	121	73	6.01741e-14	6.04691e-12	0.328,0.426,0.387	0.693,0.717,0.62	-0.296	-29.6	29.6
490	ENSG00000010626	LRRC23	12	+	6907314	6907457	6907314	6907445	6909889	6910026	490	11,28,10	11,37,8	0,0,0	14,15,13	85	73	6.93889e-14	6.83881e-12	0.462,0.394,0.518	0.0,0.0,0.0	0.458	45.8	45.8
1725	ENSG00000129968	ABHD17A	19	-	1878663	1880115	1879920	1880115	1877507	1877687	1725	80172126	101250159	108140141	63,66,55	1330	73	9.55902e-14	9.24339e-12	0.042,0.036,0.042	0.086,0.104,0.123	-0.064	-6.4	6.4
5675	ENSG00000105373	GLTSCR2	19	+	47755755	47755987	47755755	47755822	47756527	47756604	5675	51139138	59612141165	60,63,83	321220195	238	73	2.44693e-13	2.32232e-11	0.026,0.034,0.035	0.054,0.081,0.115	-0.052	-5.2	5.2
172	ENSG00000177666	PNPLA2	11	+	823693	824130	823693	823855	824313	824436	172	381712662	0,0,0	124911921151	50,2,33	348	73	2.49245e-13	2.32251e-11	1.0,1.0,1.0	0.84,0.992,0.88	0.096	9.6	9.6
209	ENSG00000054148	PHPT1	9	+	136850012	136850560	136850012	136850137	136850754	136851022	209	133261293	241690606	104145106	645602496	496	73	2.78222e-13	2.54623e-11	0.075,0.053,0.066	0.023,0.034,0.03	0.036	3.6	3.6
3441	ENSG00000160948	VPS28	8	-	144425874	144426105	144426025	144426105	144425660	144425772	3441	18,41,84	276395478	87,67,103	358196235	224	73	5.832e-13	5.24369e-11	0.021,0.033,0.054	0.073,0.1,0.125	-0.063	-6.3	6.3
2693	ENSG00000092036	HAUS4	14	-	22956745	22957094	22956915	22957094	22955099	22955176	2693	31,66,26	43,19,11	12,35,11	0,0,0	243	73	6.11289e-13	5.40147e-11	0.178,0.511,0.415	1.0,1.0,1.0	-0.632	-63.2	63.2
5617	ENSG00000225973	PIGBOS1	15	-	55318900	55319107	55318930	55319107	55317703	55317867	5617	10,16,10	4,10,12	0,4,1	55,25,13	103	73	6.44373e-13	5.59731e-11	0.639,0.531,0.371	0.0,0.102,0.052	0.462	46.2	46.2
4213	ENSG00000160226	C21orf2	21	-	44334060	44335804	44335757	44335804	44333032	44333262	4213	0,62,20	33,15,33	5,8,19	0,0,0	1770	73	9.97979e-13	8.52441e-11	0.0,0.146,0.024	1.0,1.0,1.0	-0.943	-94.3	94.3
6575	ENSG00000064012	CASP8	2	+	201276826	201277104	201276826	201276968	201284815	201285317	6575	0,0,0	44,24,15	12,9,20	4,27,13	209	73	1.29985e-12	1.09209e-10	0.0,0.0,0.0	0.512,0.104,0.35	-0.322	-32.2	32.2
8247	ENSG00000119689	DLST	14	+	74891055	74891299	74891055	74891167	74892833	74892986	8247	0,0,3	20,108,23	22,35,0	43,60,15	205	73	1.55198e-12	1.28289e-10	0.0,0.0,0.044	0.154,0.172,0.0	-0.094	-9.4	9.4
6944	ENSG00000106263	EIF3B	7	+	2363631	2363855	2363631	2363760	2364371	2364396	6944	0,0,19	137240115	20,38,25	142123121	168	73	1.84408e-12	1.50014e-10	0.0,0.0,0.067	0.058,0.118,0.082	-0.064	-6.4	6.4
5861	ENSG00000076382	SPAG5	17	-	28584649	28584745	28584651	28584745	28584425	28584480	5861	14,10,10	32,57,46	0,0,0	56,44,49	75	73	2.09432e-12	1.6771e-10	0.299,0.146,0.175	0.0,0.0,0.0	0.207	20.7	20.7
2692	ENSG00000092036	HAUS4	14	-	22956796	22956961	22956915	22956961	22955099	22955176	2692	22,56,22	43,19,11	5,31,10	0,0,0	192	73	2.21434e-12	1.74592e-10	0.163,0.528,0.432	1.0,1.0,1.0	-0.626	-62.6	62.6
3920	ENSG00000204422	XXbac-BPG32J3.20	6	-	31688028	31688103	31688040	31688103	31687823	31687900	3920	0,25,26	16,67,61	1,4,6	232146175	85	73	2.76801e-12	2.1494e-10	0.0,0.243,0.268	0.004,0.023,0.029	0.152	15.2	15.2
3180	ENSG00000087087	SRRT	7	+	100885700	100885774	100885700	100885762	100885862	100885941	3180	1,0,0	62,115,87	9,20,38	198132114	85	73	4.13236e-12	3.16095e-10	0.014,0.0,0.0	0.038,0.115,0.223	-0.121	-12.1	12.1
8857	ENSG00000136518	ACTL6A	3	+	179562922	179563117	179562922	179562973	179569823	179569900	8857	62,90,68	6,22,19	14,88,30	0,0,0	217	73	4.73233e-12	3.56664e-10	0.777,0.579,0.546	1.0,1.0,1.0	-0.366	-36.6	36.6
1471	ENSG00000178980	SEPW1	19	+	47780863	47781000	47780863	47780917	47781107	47781182	1471	10,40,39	280452475	52,37,37	265144137	156	73	5.39624e-12	4.00808e-10	0.016,0.04,0.037	0.084,0.107,0.112	-0.07	-7	7
8846	ENSG00000089693	MLF2	12	-	6750144	6750305	6750176	6750305	6749847	6750007	8846	10,10,10	6021071756	26,53,37	877736666	105	73	5.94913e-12	4.35561e-10	0.011,0.006,0.009	0.02,0.048,0.037	-0.026	-2.6	2.6
2195	ENSG00000099797	TECR	19	+	14564785	14564992	14564785	14564858	14565065	14565123	2195	531712760	0,0,0	114711171042	35,0,31	207	73	8.69882e-12	6.27908e-10	1.0,1.0,1.0	0.92,1.0,0.922	0.053	5.3	5.3
6982	ENSG00000152556	PFKM	12	+	48134942	48135383	48134942	48135038	48137720	48137846	6982	121,89,65	25,7,32	23,82,37	0,0,0	418	73	1.05425e-11	7.50418e-10	0.458,0.689,0.262	1.0,1.0,1.0	-0.53	-53	53
1783	ENSG00000101158	NELFCD	20	+	58993623	58993764	58993623	58993675	58994109	58994239	1783	328365199	7,0,0	279229164	14,14,46	162	73	1.44219e-11	1.0125e-09	0.955,1.0,1.0	0.9,0.881,0.616	0.186	18.6	18.6
5092	ENSG00000178999	AURKB	17	-	8207175	8207367	8207317	8207367	8206490	8206639	5092	360533471	6,4,4	421232276	16,15,39	215	73	1.49104e-11	1.03265e-09	0.953,0.978,0.976	0.899,0.84,0.706	0.154	15.4	15.4
5245	ENSG00000161249	DMKN	19	-	35498597	35498763	35498715	35498763	35497646	35497681	5245	139,90,122	61,49,95	279215171	24,28,37	191	73	2.62645e-11	1.79474e-09	0.466,0.412,0.329	0.816,0.746,0.639	-0.331	-33.1	33.1
7483	ENSG00000126226	PCID2	13	-	113208023	113208650	113208598	113208650	113200426	113200516	7483	0,1,1	20,22,47	27,14,2	26,8,16	648	73	3.28165e-11	2.21296e-09	0.0,0.005,0.002	0.105,0.165,0.014	-0.092	-9.2	9.2
3148	ENSG00000138834	MAPK8IP3	16	+	1761223	1761305	1761223	1761278	1762350	1762481	3148	8,15,3	0,0,0	20,12,12	17,8,11	100	73	3.50876e-11	2.33538e-09	1.0,1.0,1.0	0.462,0.523,0.443	0.524	52.4	52.4
5848	ENSG00000106052	TAX1BP1	7	+	27816348	27816520	27816348	27816394	27816889	27817038	5848	36,0,16	48,117,88	1,0,7	150172203	199	73	3.69363e-11	2.42691e-09	0.216,0.0,0.063	0.002,0.0,0.012	0.088	8.8	8.8
2566	ENSG00000076944	STXBP2	19	+	7647161	7647511	7647161	7647247	7647724	7647873	2566	379790580	0,3,0	412440492	12,12,11	337	73	4.08642e-11	2.63078e-09	1.0,0.983,1.0	0.881,0.888,0.906	0.103	10.3	10.3
795	ENSG00000137312	FLOT1	6	-	30741189	30741704	30741613	30741704	30740678	30740798	795	106,80,186	6,9,14	90,80,102	0,0,0	497	73	4.10658e-11	2.63078e-09	0.722,0.566,0.661	1.0,1.0,1.0	-0.35	-35	35
752	ENSG00000148362	C9orf142	9	+	136992639	136992704	136992639	136992700	136992924	136992974	752	15,28,33	140140159	55,50,37	32,84,40	77	73	4.28129e-11	2.70884e-09	0.092,0.159,0.164	0.62,0.361,0.467	-0.344	-34.4	34.4
4087	ENSG00000102393	GLA	X	-	101401631	101401809	101401667	101401809	101400665	101400757	4087	19,25,34	11,14,0	225174180	0,0,0	109	73	5.06889e-11	3.16806e-09	0.536,0.545,1.0	1.0,1.0,1.0	-0.306	-30.6	30.6
8062	ENSG00000164068	RNF123	3	+	49712478	49712656	49712478	49712536	49713512	49713587	8062	21,90,90	12,43,36	40,23,31	0,0,3	193	73	7.17871e-11	4.43264e-09	0.398,0.442,0.486	1.0,1.0,0.796	-0.49	-49	49
3987	ENSG00000100258	LMF2	22	-	50506284	50506502	50506369	50506502	50506034	50506213	3987	45,131,23	0,0,0	35,37,28	9,4,5	158	73	8.52096e-11	5.1988e-09	1.0,1.0,1.0	0.642,0.81,0.721	0.276	27.6	27.6
2355	ENSG00000186166	CCDC84	11	+	119011220	119011311	119011220	119011283	119011938	119012003	2355	5,4,1	13,6,13	77,70,57	35,1,4	101	73	8.91185e-11	5.37332e-09	0.218,0.325,0.053	0.614,0.981,0.912	-0.637	-63.7	63.7
3250	ENSG00000270647	TAF15	17	+	35824077	35824198	35824077	35824099	35833906	35833941	3250	200441405	7,14,19	229310260	0,0,0	172	73	1.12513e-10	6.70496e-09	0.924,0.93,0.9	1.0,1.0,1.0	-0.082	-8.2	8.2
3024	ENSG00000007923	DNAJC11	1	-	6638082	6638364	6638294	6638364	6637446	6637504	3024	1,0,0	90,79,26	29,13,3	50,57,68	285	73	1.32829e-10	7.82468e-09	0.003,0.0,0.0	0.129,0.055,0.011	-0.064	-6.4	6.4
8672	ENSG00000165006	UBAP1	9	+	34250657	34250871	34250657	34250759	34251391	34251850	8672	0,0,0	16,20,40	22,29,28	114,31,99	185	73	1.66812e-10	9.7149e-09	0.0,0.0,0.0	0.071,0.27,0.1	-0.147	-14.7	14.7
8298	ENSG00000084764	MAPRE3	2	+	27024095	27024297	27024095	27024252	27025582	27025737	8298	21,35,33	0,0,0	18,45,3	4,17,12	118	73	1.73801e-10	1.00082e-08	1.0,1.0,1.0	0.736,0.621,0.134	0.503	50.3	50.3
2128	ENSG00000157045	NTAN1	16	-	15047417	15047550	15047441	15047550	15044333	15044407	2128	2,16,16	11,44,17	2,0,0	21,25,69	97	73	1.94325e-10	1.10657e-08	0.12,0.215,0.415	0.067,0.0,0.0	0.228	22.8	22.8
5421	ENSG00000074219	TEAD2	19	-	49343230	49343398	49343269	49343398	49342437	49342590	5421	14,45,58	3,9,18	19,20,40	0,0,0	112	73	2.13399e-10	1.20184e-08	0.753,0.765,0.677	1.0,1.0,1.0	-0.268	-26.8	26.8
6518	ENSG00000108384	RAD51C	17	+	58692572	58692788	58692572	58692685	58694930	58695189	6518	118272241	0,20,13	427485420	6,0,0	176	73	2.53832e-10	1.41401e-08	1.0,0.849,0.885	0.967,1.0,1.0	-0.078	-7.8	7.8
5048	ENSG00000185049	NELFA	4	-	1985993	1986183	1986113	1986183	1985775	1985864	5048	4,0,0	27,57,60	26,7,23	90,51,29	193	73	3.01957e-10	1.66401e-08	0.053,0.0,0.0	0.099,0.049,0.231	-0.109	-10.9	10.9
1915	ENSG00000064687	ABCA7	19	+	1063759	1063899	1063759	1063775	1064160	1064253	1915	53,131,96	0,13,11	167125200	0,0,0	197	73	3.21993e-10	1.75555e-08	1.0,0.789,0.764	1.0,1.0,1.0	-0.149	-14.9	14.9
2970	ENSG00000160408	ST6GALNAC6	9	-	127890636	127891043	127890655	127891043	127887483	127887591	2970	30,11,12	17,2,12	11,24,16	0,0,0	92	73	3.4431e-10	1.85746e-08	0.583,0.814,0.442	1.0,1.0,1.0	-0.387	-38.7	38.7
2401	ENSG00000173465	SSSCA1	11	+	65570606	65570760	65570606	65570755	65570885	65570970	2401	1,0,5	118158130	26,19,0	113,81,74	78	73	3.62556e-10	1.93552e-08	0.008,0.0,0.035	0.177,0.18,0.0	-0.105	-10.5	10.5
7199	ENSG00000229117	RPL41	12	+	56116774	56116930	56116774	56116799	56117188	56117211	7199	218437426	550085548521	498520505	794052775300	204	73	3.7497e-10	1.98116e-08	0.014,0.018,0.018	0.022,0.034,0.033	-0.013	-1.3	1.3
3249	ENSG00000270647	TAF15	17	+	35809483	35809616	35809483	35809576	35817715	35817755	3249	0,3,0	106,129,69	8,4,17	44,61,71	113	73	5.87672e-10	3.04662e-08	0.0,0.015,0.0	0.105,0.041,0.134	-0.088	-8.8	8.8
531	ENSG00000023287	RB1CC1	8	-	52628031	52628168	52628040	52628168	52624716	52624787	531	21,49,16	0,0,0	17,13,21	54,5,4	82	73	5.88518e-10	3.04662e-08	1.0,1.0,1.0	0.219,0.698,0.824	0.42	42	42
2145	ENSG00000135597	REPS1	6	-	138926400	138930098	138929976	138930098	138921036	138921124	2145	30,35,31	0,17,13	67,61,73	0,0,0	3649	73	6.73746e-10	3.45295e-08	1.0,0.04,0.046	1.0,1.0,1.0	-0.638	-63.8	63.8
5840	ENSG00000143793	C1orf35	1	-	228102309	228102560	228102477	228102560	228102083	228102165	5840	58,97,89	0,0,0	90,73,79	28,1,24	241	73	7.38266e-10	3.74615e-08	1.0,1.0,1.0	0.493,0.957,0.499	0.35	35	35
4145	ENSG00000106400	ZNHIT1	7	+	101218318	101221796	101218318	101218485	101222603	101222774	4145	6,83,47	23,0,4	53,82,70	0,0,0	3384	73	8.13816e-10	4.08903e-08	0.006,1.0,0.202	1.0,1.0,1.0	-0.597	-59.7	59.7
2433	ENSG00000105372	RPS19	19	+	41860445	41860601	41860445	41860494	41860774	41860844	2433	12,12,17	7,16,11	13,35,13	94119141	180	73	9.15331e-10	4.55444e-08	0.41,0.233,0.385	0.053,0.107,0.036	0.277	27.7	27.7
4433	ENSG00000263809	RP11-849F2.7	17	-	8382774	8382998	8382780	8382998	8382142	8382315	4433	1,0,0	35,61,52	9,16,14	126,31,54	79	73	1.01831e-09	5.01814e-08	0.026,0.0,0.0	0.062,0.323,0.193	-0.184	-18.4	18.4
1694	ENSG00000172809	RPL38	17	+	74203581	74203736	74203581	74203710	74203917	74203958	1694	39,9,11	397778495	33,71,23	432423339	99	73	1.34045e-09	6.48881e-08	0.068,0.008,0.016	0.053,0.11,0.048	-0.04	-4	4
7998	ENSG00000184164	CRELD2	22	+	49923233	49923449	49923233	49923317	49924359	49924455	7998	0,10,0	34,142,88	27,69,0	77,65,80	205	73	1.34208e-09	6.48881e-08	0.0,0.024,0.0	0.111,0.274,0.0	-0.12	-12	12
772	ENSG00000276291	FRG1HP	9	+	40992260	40992775	40992260	40992479	40993252	40993434	772	34,98,52	0,0,0	72,42,82	4,14,7	369	73	1.41903e-09	6.79675e-08	1.0,1.0,1.0	0.781,0.372,0.699	0.383	38.3	38.3
7714	ENSG00000131748	STARD3	17	+	39662250	39662367	39662250	39662344	39662803	39663484	7714	4,24,8	104,140,67	0,1,0	89,89,101	96	73	1.56219e-09	7.41315e-08	0.028,0.115,0.083	0.0,0.008,0.0	0.073	7.3	7.3
348	ENSG00000079459	FDFT1	8	+	11830243	11830420	11830243	11830254	11831517	11831670	348	366468448	16,10,12	312206250	0,0,0	239	73	1.58302e-09	7.44311e-08	0.875,0.935,0.919	1.0,1.0,1.0	-0.09	-9	9
2438	ENSG00000159086	PAXBP1	21	-	32755212	32755353	32755229	32755353	32751118	32751218	2438	13,12,14	0,0,0	0,26,14	13,9,6	90	73	1.73162e-09	8.06778e-08	1.0,1.0,1.0	0.0,0.701,0.654	0.548	54.8	54.8
2806	ENSG00000105443	CYTH2	19	+	48474837	48474953	48474837	48474949	48478068	48478145	2806	0,1,0	28,61,35	5,17,10	33,35,71	77	73	2.04623e-09	9.44766e-08	0.0,0.015,0.0	0.126,0.315,0.118	-0.181	-18.1	18.1
4632	ENSG00000001497	LAS1L	X	-	65520701	65523707	65523559	65523707	65517986	65518465	4632	52,5,8	42,99,76	23,61,22	24,37,15	2931	73	2.13998e-09	9.79233e-08	0.03,0.001,0.003	0.023,0.039,0.035	-0.021	-2.1	2.1
2834	ENSG00000122705	CLTA	9	+	36204067	36204183	36204067	36204179	36211607	36211784	2834	41,74,73	0,0,0	58,31,29	0,12,14	77	73	2.22847e-09	1.0107e-07	1.0,1.0,1.0	1.0,0.71,0.663	0.209	20.9	20.9
1148	ENSG00000096746	HNRNPH3	10	+	68338502	68338687	68338502	68338642	68339139	68339226	1148	131242222	42,40,44	666502521	339272303	118	73	2.7202e-09	1.2229e-07	0.659,0.789,0.757	0.549,0.533,0.515	0.203	20.3	20.3
5889	ENSG00000141503	MINK1	17	+	4894173	4894381	4894173	4894311	4894524	4894633	5889	0,15,0	5,32,34	21,19,14	14,0,0	143	73	2.7653e-09	1.23236e-07	0.0,0.193,0.0	0.434,1.0,1.0	-0.747	-74.7	74.7
8743	ENSG00000108465	CDK5RAP3	17	+	47973518	47973696	47973518	47973650	47973930	47974031	8743	11,0,4	44,111,95	10,23,21	31,12,33	119	73	2.80642e-09	1.23991e-07	0.133,0.0,0.025	0.165,0.54,0.281	-0.276	-27.6	27.6
8750	ENSG00000100296	THOC5	22	-	29528936	29529239	29529161	29529239	29528425	29528466	8750	0,0,0	11,42,86	17,7,0	28,14,16	298	73	2.85115e-09	1.2489e-07	0.0,0.0,0.0	0.129,0.109,0.0	-0.079	-7.9	7.9
8771	ENSG00000177675	CD163L1	12	-	7368057	7368197	7368086	7368197	7367235	7367331	8771	0,0,0	14,20,137	25,22,0	63,137,86	102	73	2.96302e-09	1.28691e-07	0.0,0.0,0.0	0.221,0.103,0.0	-0.108	-10.8	10.8
4419	ENSG00000136811	ODF2	9	+	128496040	128496297	128496040	128496141	128498412	128498575	4419	9,1,0	37,192,72	5,60,10	169,117,56	229	73	3.50753e-09	1.5106e-07	0.072,0.002,0.0	0.009,0.141,0.054	-0.043	-4.3	4.3
1302	ENSG00000278615	C11orf98	11	-	62665056	62665191	62665130	62665191	62664848	62664973	1302	43,101,81	394735598	39,28,21	656473509	147	73	3.57748e-09	1.52788e-07	0.051,0.064,0.063	0.029,0.029,0.02	0.033	3.3	3.3
4927	ENSG00000185803	SLC52A2	8	+	144358592	144359065	144358592	144358783	144359183	144359423	4927	235393350	7,11,5	378450363	0,0,0	355	73	3.85184e-09	1.63146e-07	0.873,0.88,0.935	1.0,1.0,1.0	-0.104	-10.4	10.4
4562	ENSG00000090863	GLG1	16	-	74461958	74462195	74462093	74462195	74459681	74459789	4562	41,8,29	79160123	2,0,2	44,73,45	208	73	4.12448e-09	1.72454e-07	0.154,0.017,0.076	0.016,0.0,0.015	0.072	7.2	7.2
6659	ENSG00000148341	SH3GLB2	9	-	129022277	129022347	129022281	129022347	129021090	129021219	6659	11,17,6	43,70,42	0,0,0	33,5,38	77	73	4.17255e-09	1.72454e-07	0.195,0.187,0.119	0.0,0.0,0.0	0.167	16.7	16.7
7131	ENSG00000265681	RPL17	18	-	49491516	49491584	49491531	49491584	49490792	49490927	7131	23,69,65	27,0,20	132,160,74	0,0,0	88	73	4.16314e-09	1.72454e-07	0.414,1.0,0.729	1.0,1.0,1.0	-0.286	-28.6	28.6
669	ENSG00000146054	TRIM7	5	-	181203476	181203640	181203544	181203640	181199850	181200081	669	62,15,53	15,5,13	136107136	0,7,7	141	73	4.30977e-09	1.76701e-07	0.682,0.608,0.679	1.0,0.888,0.91	-0.276	-27.6	27.6
7140	ENSG00000255717	SNHG1	11	-	62853341	62853590	62853551	62853590	62853074	62853115	7140	87,187,64	224371272	89,88,142	690489547	283	73	4.99259e-09	2.03071e-07	0.091,0.115,0.057	0.032,0.044,0.063	0.041	4.1	4.1
2331	ENSG00000049656	CLPTM1L	5	-	1324762	1325816	1325750	1325816	1322876	1322911	2331	5,27,12	0,0,0	18,1,24	11,5,0	1061	73	5.23228e-09	2.11145e-07	1.0,1.0,1.0	0.101,0.014,1.0	0.628	62.8	62.8
1085	ENSG00000173171	MTX1	1	+	155210547	155212219	155210547	155210627	155212384	155212567	1085	285469434	0,5,10	172160182	64,8,28	1665	73	5.42016e-09	2.17018e-07	1.0,0.804,0.656	0.105,0.467,0.222	0.555	55.5	55.5
1794	ENSG00000119537	KDSR	18	-	63350881	63351079	63350887	63351079	63344409	63344493	1794	10,8,0	43,38,41	0,0,0	111134111	79	73	5.52324e-09	2.19431e-07	0.177,0.163,0.0	0.0,0.0,0.0	0.113	11.3	11.3
3464	ENSG00000181929	PRKAG1	12	-	49018523	49018748	49018731	49018748	49013061	49013110	3464	42,154,97	2,28,28	19,20,9	28,30,12	281	73	5.6459e-09	2.22579e-07	0.845,0.588,0.474	0.15,0.148,0.163	0.482	48.2	48.2
3212	ENSG00000147586	MRPS28	8	-	80030020	80030232	80030053	80030232	79919124	79919148	3212	51,106,66	0,0,0	46,48,69	14,10,0	106	73	6.14916e-09	2.40568e-07	1.0,1.0,1.0	0.694,0.768,1.0	0.179	17.9	17.9
4119	ENSG00000101901	ALG13	X	+	111682131	111682300	111682131	111682294	111684964	111685103	4119	0,0,0	43,34,46	37,8,16	154,197,93	79	73	6.29323e-09	2.41662e-07	0.0,0.0,0.0	0.182,0.036,0.137	-0.118	-11.8	11.8
6100	ENSG00000115762	PLEKHB2	2	+	131132901	131133015	131132901	131132991	131140166	131140275	6100	0,0,0	4,16,33	5,14,9	36,26,13	97	73	6.31857e-09	2.41662e-07	0.0,0.0,0.0	0.095,0.288,0.343	-0.242	-24.2	24.2
7784	ENSG00000117118	SDHB	1	-	17023840	17024074	17023972	17024074	17022607	17022730	7784	0,15,24	349411498	76,10,55	699371432	205	73	6.29721e-09	2.41662e-07	0.0,0.013,0.017	0.037,0.01,0.043	-0.02	-2	2
7321	ENSG00000121152	NCAPH	2	+	96369424	96369513	96369424	96369500	96373291	96373845	7321	0,0,0	25,64,61	8,33,1	65,74,65	86	73	7.71188e-09	2.92766e-07	0.0,0.0,0.0	0.095,0.275,0.013	-0.128	-12.8	12.8
7091	ENSG00000111237	VPS29	12	-	110499456	110499546	110499534	110499546	110498819	110498859	7091	3,16,20	0,0,2	10,39,0	11,17,11	151	73	7.90269e-09	2.97804e-07	1.0,1.0,0.829	0.305,0.526,0.0	0.666	66.6	66.6
1914	ENSG00000064687	ABCA7	19	+	1063759	1063863	1063759	1063775	1064160	1064253	1914	76198165	0,13,11	155158201	0,0,0	161	73	8.44032e-09	3.15742e-07	1.0,0.874,0.872	1.0,1.0,1.0	-0.085	-8.5	8.5
2687	ENSG00000104852	SNRNP70	19	+	49102113	49102185	49102113	49102173	49104633	49104735	2687	0,0,0	16,9,8	18,9,26	64,21,62	85	73	8.6707e-09	3.20103e-07	0.0,0.0,0.0	0.195,0.269,0.265	-0.243	-24.3	24.3
3908	ENSG00000170632	ARMC10	7	+	103083681	103084062	103083681	103083830	103086629	103086764	3908	0,0,4	18,34,23	17,15,5	35,19,13	305	73	8.68183e-09	3.20103e-07	0.0,0.0,0.04	0.104,0.159,0.084	-0.102	-10.2	10.2
270	ENSG00000272752	STAG3L5P-PVRIG2P-PILRB	7	+	100353372	100354012	100353372	100353483	100355142	100355240	270	26158138	0,16,6	171239233	0,0,0	602	73	8.90936e-09	3.25434e-07	1.0,0.545,0.736	1.0,1.0,1.0	-0.24	-24	24
2786	ENSG00000160789	LMNA	1	+	156130616	156130818	156130616	156130773	156134402	156134528	2786	3,0,15	187516458	26,42,25	389627498	118	73	8.95339e-09	3.25434e-07	0.01,0.0,0.02	0.04,0.04,0.03	-0.027	-2.7	2.7
1469	ENSG00000178980	SEPW1	19	+	47780814	47780964	47780814	47780917	47781107	47781182	1469	0,42,4	280452475	33,15,21	265144137	120	73	9.09951e-09	3.28415e-07	0.0,0.054,0.005	0.07,0.06,0.085	-0.052	-5.2	5.2
4386	ENSG00000102125	TAZ	X	+	154413206	154413352	154413206	154413252	154413481	154413567	4386	0,0,2	11,32,4	11,5,11	0,12,0	173	73	1.01766e-08	3.64722e-07	0.0,0.0,0.174	1.0,0.15,1.0	-0.659	-65.9	65.9
4383	ENSG00000102125	TAZ	X	+	154413206	154413358	154413206	154413252	154413481	154413567	4383	0,0,2	11,32,4	11,5,11	0,12,0	179	73	1.14424e-08	4.07237e-07	0.0,0.0,0.169	1.0,0.145,1.0	-0.659	-65.9	65.9
2242	ENSG00000092094	OSGEP	14	-	20448901	20449013	20448963	20449013	20448732	20448811	2242	0,3,3	18,26,36	36,22,12	27,19,44	135	73	1.2515e-08	4.42341e-07	0.0,0.059,0.043	0.419,0.385,0.129	-0.277	-27.7	27.7
4928	ENSG00000185803	SLC52A2	8	+	144358592	144358900	144358592	144358783	144359183	144359423	4928	77181208	7,11,5	96198169	0,0,0	190	73	1.26736e-08	4.44879e-07	0.809,0.863,0.941	1.0,1.0,1.0	-0.129	-12.9	12.9
8699	ENSG00000139725	RHOF	12	-	121780871	121781006	121780875	121781006	121779417	121779662	8699	113200197	0,0,0	245163183	3,9,22	77	73	1.36222e-08	4.74922e-07	1.0,1.0,1.0	0.987,0.945,0.887	0.06	6	6
4384	ENSG00000102125	TAZ	X	+	154413206	154413370	154413206	154413252	154413481	154413567	4384	0,0,2	11,32,4	11,5,11	0,12,0	191	73	1.44811e-08	5.01457e-07	0.0,0.0,0.16	1.0,0.137,1.0	-0.659	-65.9	65.9
5640	ENSG00000277258	PCGF2	17	-	38738748	38738861	38738752	38738861	38738540	38738595	5640	17,21,1	62,129,94	4,0,0	115,78,103	77	73	1.46016e-08	5.02235e-07	0.206,0.134,0.01	0.032,0.0,0.0	0.106	10.6	10.6
3252	ENSG00000270647	TAF15	17	+	35820046	35820248	35820046	35820075	35820331	35820437	3252	99237124	0,0,0	102115148	0,6,17	246	73	1.70503e-08	5.82552e-07	1.0,1.0,1.0	1.0,0.85,0.721	0.143	14.3	14.3
3170	ENSG00000263798	RP11-6N17.9	17	+	47973518	47973693	47973518	47973650	47973930	47974031	3170	11,0,4	44,111,95	10,32,21	31,12,33	116	73	1.85725e-08	6.30357e-07	0.136,0.0,0.026	0.169,0.627,0.286	-0.307	-30.7	30.7
2202	ENSG00000168894	RNF181	2	+	85596518	85596734	85596518	85596649	85596821	85596931	2202	5,7,7	181279237	44,25,19	363212281	158	73	1.94501e-08	6.51993e-07	0.013,0.011,0.013	0.053,0.052,0.03	-0.033	-3.3	3.3
7733	ENSG00000215472	RPL17-C18orf32	18	-	49491351	49491584	49491531	49491584	49490792	49490927	7733	37,84,93	27,0,20	147190130	0,0,0	253	73	1.94644e-08	6.51993e-07	0.283,1.0,0.573	1.0,1.0,1.0	-0.381	-38.1	38.1
2711	ENSG00000166986	MARS	12	+	57512007	57512353	57512007	57512103	57512750	57512964	2711	183490506	0,0,0	118213191	3,0,27	323	73	2.41226e-08	8.0278e-07	1.0,1.0,1.0	0.899,1.0,0.615	0.162	16.2	16.2
8045	ENSG00000105755	ETHE1	19	-	43511398	43511566	43511436	43511566	43508774	43508864	8045	0,1,9	182367360	11,30,1	211215169	111	73	2.4599e-08	8.13352e-07	0.0,0.002,0.016	0.033,0.084,0.004	-0.034	-3.4	3.4
8256	ENSG00000090372	STRN4	19	-	46721985	46722340	46722241	46722340	46720535	46720771	8256	153258158	0,0,0	232171227	11,13,0	329	73	3.15745e-08	1.0373e-06	1.0,1.0,1.0	0.824,0.745,1.0	0.144	14.4	14.4
8464	ENSG00000104783	KCNN4	19	-	43780702	43781257	43781226	43781257	43776540	43776636	8464	101153190	3,7,12	101,72,34	0,0,0	597	73	3.34813e-08	1.09294e-06	0.805,0.728,0.659	1.0,1.0,1.0	-0.269	-26.9	26.9
4360	ENSG00000158773	USF1	1	-	161042554	161042670	161042585	161042670	161042115	161042217	4360	34,33,51	0,9,11	109,81,76	2,0,0	104	73	3.68862e-08	1.19647e-06	1.0,0.72,0.765	0.975,1.0,1.0	-0.163	-16.3	16.3
4567	ENSG00000214293	APTR	7	-	77695895	77696265	77696171	77696265	77685201	77685328	4567	47,33,72	11,7,0	167,125,81	0,0,0	349	73	3.83053e-08	1.23468e-06	0.472,0.496,1.0	1.0,1.0,1.0	-0.344	-34.4	34.4
7692	ENSG00000255508	RP11-864I4.1	11	-	62573830	62574003	62573981	62574003	62572583	62572742	7692	191831222669	0,16,0	1083872902	22,6,9	224	73	3.86126e-08	1.23681e-06	1.0,0.985,1.0	0.941,0.979,0.97	0.032	3.2	3.2
3356	ENSG00000250588	IQCJ-SCHIP1	3	+	159764442	159765138	159764442	159765099	159866162	159866281	3356	21,2,13	0,0,0	44,24,3	20,4,2	112	73	4.0331e-08	1.28383e-06	1.0,1.0,1.0	0.589,0.796,0.494	0.374	37.4	37.4
4296	ENSG00000089157	RPLP0	12	-	120200718	120200831	120200729	120200831	120199309	120199485	4296	127194146	382666715982	54,43,35	352528482786	84	73	4.13676e-08	1.30067e-06	0.028,0.025,0.021	0.013,0.013,0.011	0.012	1.2	1.2
4862	ENSG00000118418	HMGN3	6	-	79202275	79202388	79202316	79202388	79201244	79201726	4862	112202176	88,99,187	221180141	385342336	114	73	4.12656e-08	1.30067e-06	0.449,0.566,0.376	0.269,0.252,0.212	0.219	21.9	21.9
1303	ENSG00000278615	C11orf98	11	-	62665122	62665217	62665130	62665217	62664848	62664973	1303	39,28,56	394735598	24,6,13	656473509	81	73	4.32355e-08	1.35111e-06	0.082,0.033,0.078	0.032,0.011,0.022	0.043	4.3	4.3
437	ENSG00000174231	PRPF8	17	-	1653537	1653683	1653541	1653683	1651647	1651788	437	0,63,25	188371424	10,9,2	364281396	77	73	4.49557e-08	1.39635e-06	0.0,0.139,0.053	0.025,0.029,0.005	0.044	4.4	4.4
1751	ENSG00000067836	ROGDI	16	-	4801049	4801321	4801266	4801321	4800497	4800578	1751	0,0,5	15,28,25	27,0,20	27,8,12	290	73	4.62175e-08	1.4269e-06	0.0,0.0,0.048	0.201,0.0,0.296	-0.15	-15	15
2514	ENSG00000162066	AMDHD2	16	+	2528451	2528718	2528451	2528559	2528993	2529095	2514	20,16,17	4,10,1	6,8,7	0,0,0	232	73	4.90495e-08	1.50526e-06	0.611,0.335,0.842	1.0,1.0,1.0	-0.404	-40.4	40.4
2372	ENSG00000073921	PICALM	11	-	86010984	86011136	86011029	86011136	86007541	86007583	2372	0,0,0	4,16,15	0,22,8	4,13,8	118	73	5.36121e-08	1.63549e-06	0.0,0.0,0.0	0.0,0.511,0.382	-0.298	-29.8	29.8
8099	ENSG00000130706	ADRM1	20	+	62302895	62303049	62302895	62303045	62303567	62303781	8099	225275258	13,20,10	226196230	22,35,54	77	73	5.83179e-08	1.76851e-06	0.943,0.929,0.961	0.907,0.841,0.802	0.094	9.4	9.4
8574	ENSG00000176978	DPP7	9	-	137111872	137111997	137111940	137111997	137111689	137111754	8574	65213351158	13,55,32	625624514	10,0,5	141	73	5.88296e-08	1.77354e-06	0.963,0.926,0.949	0.97,1.0,0.982	-0.038	-3.8	3.8
3357	ENSG00000174748	RPL15	3	+	23917946	23918047	23917946	23918031	23918439	23918576	3357	49213113	215438563248	121148143	219820441670	89	73	5.93815e-08	1.77971e-06	0.018,0.043,0.028	0.043,0.056,0.066	-0.025	-2.5	2.5
676	ENSG00000145191	EIF2B5	3	+	184140079	184140221	184140079	184140157	184140417	184140730	676	0,0,0	19,35,16	22,8,0	32,22,33	137	73	6.0119e-08	1.79134e-06	0.0,0.0,0.0	0.268,0.162,0.0	-0.143	-14.3	14.3
2221	ENSG00000112130	RNF8	6	+	37374619	37374741	37374619	37374709	37376925	37377033	2221	1,0,0	12,23,49	23,12,9	29,52,0	105	73	6.06034e-08	1.79533e-06	0.055,0.0,0.0	0.355,0.138,1.0	-0.479	-47.9	47.9
774	ENSG00000230082	PRRT3-AS1	3	+	9947403	9947604	9947403	9947405	9948066	9948180	774	24,20,9	18,12,0	28,25,24	0,0,0	272	73	6.42167e-08	1.89144e-06	0.264,0.309,1.0	1.0,1.0,1.0	-0.476	-47.6	47.6
5271	ENSG00000104129	DNAJC17	15	-	40774967	40775108	40775030	40775108	40774355	40774436	5271	13,19,4	14,60,55	0,3,0	73,25,30	136	73	6.69331e-08	1.96018e-06	0.333,0.145,0.038	0.0,0.061,0.0	0.152	15.2	15.2
2254	ENSG00000132424	PNISR	6	-	99403828	99404702	99404602	99404702	99402539	99402710	2254	62,106,68	0,5,0	188204114	119,18,83	847	73	6.7945e-08	1.97241e-06	1.0,0.646,1.0	0.12,0.494,0.106	0.642	64.2	64.2
8629	ENSG00000168522	FNTA	8	+	43077215	43080441	43077215	43077364	43083117	43083180	8629	38,98,28	29,31,58	206238177	58,35,92	3150	73	6.81204e-08	1.97241e-06	0.029,0.068,0.011	0.076,0.136,0.043	-0.049	-4.9	4.9
775	ENSG00000230082	PRRT3-AS1	3	+	9947403	9947523	9947403	9947405	9948066	9948180	775	15,3,4	18,12,0	6,3,12	0,0,0	191	73	7.67913e-08	2.21099e-06	0.242,0.087,1.0	1.0,1.0,1.0	-0.557	-55.7	55.7
5851	ENSG00000125734	GPR108	19	-	6732471	6732549	6732475	6732549	6732262	6732380	5851	0,4,0	128,166,85	15,7,3	132,65,43	77	73	7.87914e-08	2.2559e-06	0.0,0.022,0.0	0.097,0.093,0.062	-0.077	-7.7	7.7
3277	ENSG00000126214	KLC1	14	+	103679383	103679545	103679383	103679518	103684985	103685036	3277	97,91,89	0,4,0	110,72,71	20,24,0	100	73	8.3339e-08	2.37285e-06	1.0,0.943,1.0	0.801,0.687,1.0	0.152	15.2	15.2
5953	ENSG00000153914	SREK1	5	+	66162413	66162592	66162413	66162483	66163791	66163922	5953	76,55,36	0,0,0	99,127,56	2,15,7	182	73	8.46873e-08	2.39792e-06	1.0,1.0,1.0	0.952,0.773,0.762	0.171	17.1	17.1
7430	ENSG00000130811	EIF3G	19	-	10119066	10119171	10119087	10119171	10118867	10118956	7430	11,10,10	245422542	51,19,52	619526468	94	73	8.74459e-08	2.46242e-06	0.034,0.018,0.014	0.06,0.027,0.079	-0.033	-3.3	3.3
1150	ENSG00000096746	HNRNPH3	10	+	68338502	68338669	68338502	68338642	68339139	68339226	1150	38,64,55	42,40,44	203111116	339272303	100	73	8.90465e-08	2.49379e-06	0.398,0.539,0.477	0.304,0.23,0.218	0.221	22.1	22.1
5046	ENSG00000185049	NELFA	4	-	1986051	1986183	1986113	1986183	1985775	1985864	5046	4,0,0	27,57,60	22,3,15	90,51,29	135	73	1.16925e-07	3.25673e-06	0.074,0.0,0.0	0.117,0.031,0.219	-0.098	-9.8	9.8
5445	ENSG00000159352	PSMD4	1	+	151266003	151266208	151266003	151266112	151266307	151266439	5445	28,13,10	366576531	38,60,12	432322427	169	73	1.22072e-07	3.38174e-06	0.032,0.01,0.008	0.037,0.074,0.012	-0.024	-2.4	2.4
1641	ENSG00000183010	PYCR1	17	-	81937241	81937296	81937261	81937296	81936747	81936861	1641	17,29,9	94,86,162	0,3,0	69,39,37	93	73	1.25122e-07	3.42914e-06	0.124,0.209,0.042	0.0,0.057,0.0	0.106	10.6	10.6
6748	ENSG00000177830	CHID1	11	-	883147	883303	883199	883303	870418	870499	6748	251418426	0,0,0	359176245	26,0,1	125	73	1.25114e-07	3.42914e-06	1.0,1.0,1.0	0.89,1.0,0.993	0.039	3.9	3.9
560	ENSG00000171960	PPIH	1	+	42659227	42659370	42659227	42659251	42659521	42659566	560	0,0,2	146272256	14,7,17	147,176,91	192	73	1.26636e-07	3.45217e-06	0.0,0.0,0.003	0.035,0.015,0.066	-0.038	-3.8	3.8
4006	ENSG00000065029	ZNF76	6	+	35293750	35293928	35293750	35293915	35294455	35294569	4006	1,31,9	10,35,39	0,0,0	9,18,7	86	73	1.30523e-07	3.53932e-06	0.078,0.429,0.164	0.0,0.0,0.0	0.224	22.4	22.4
3618	ENSG00000149273	RPS3	11	+	75401639	75402446	75401639	75401733	75404019	75404207	3618	84821499314541	0,2,28	928377937111	14,26,26	786	73	1.37815e-07	3.69791e-06	1.0,0.999,0.98	0.984,0.965,0.962	0.023	2.3	2.3
844	ENSG00000214174	AMZ2P1	17	-	64974554	64975576	64975559	64975576	64972753	64973517	844	53,154,70	0,0,0	73,16,29	16,0,3	1078	73	1.37444e-07	3.69791e-06	1.0,1.0,1.0	0.236,1.0,0.396	0.456	45.6	45.6
2688	ENSG00000104852	SNRNP70	19	+	49102113	49103587	49102113	49102185	49104633	49104735	2688	334527218	0,0,0	225719432034	18,9,24	1475	73	1.45742e-07	3.84022e-06	1.0,1.0,1.0	0.861,0.914,0.807	0.139	13.9	13.9
3124	ENSG00000142541	RPL13A	19	+	49489849	49490090	49489849	49489912	49490231	49490297	3124	146133932570	57197174	14259881084	39,12,45	251	73	1.44839e-07	3.84022e-06	0.882,0.834,0.811	0.914,0.96,0.875	-0.074	-7.4	7.4
5691	ENSG00000090316	MAEA	4	+	1311978	1312238	1311978	1312161	1315396	1315600	5691	0,0,0	37,71,18	27,0,7	14,27,21	150	73	1.46116e-07	3.84022e-06	0.0,0.0,0.0	0.484,0.0,0.14	-0.208	-20.8	20.8
7322	ENSG00000011009	LYPLA2	1	+	23793710	23793930	23793710	23793752	23794062	23794136	7322	113204147	0,0,0	273166210	13,0,11	251	73	1.44346e-07	3.84022e-06	1.0,1.0,1.0	0.859,1.0,0.847	0.098	9.8	9.8
5751	ENSG00000121774	KHDRBS1	1	+	32037834	32038119	32037834	32038036	32038551	32038619	5751	3,12,2	144153102	13,24,10	74,98,83	156	73	1.57957e-07	4.13025e-06	0.01,0.035,0.009	0.076,0.103,0.053	-0.059	-5.9	5.9
3149	ENSG00000138834	MAPK8IP3	16	+	1766722	1766803	1766722	1766801	1766903	1766971	3149	7,22,19	0,0,0	16,27,21	6,8,3	75	73	1.75627e-07	4.56897e-06	1.0,1.0,1.0	0.722,0.767,0.872	0.213	21.3	21.3
1781	ENSG00000101158	NELFCD	20	+	58989857	58990232	58989857	58989988	58990909	58991075	1781	6,0,1	41,37,23	8,20,65	108,39,39	317	73	1.84171e-07	4.76705e-06	0.033,0.0,0.01	0.017,0.106,0.277	-0.119	-11.9	11.9
101	ENSG00000088340	FER1L4	20	-	35560122	35560638	35560539	35560638	35559340	35559627	101	37,72,76	0,0,0	28,12,24	0,4,15	490	73	1.85848e-07	4.78629e-06	1.0,1.0,1.0	1.0,0.309,0.192	0.5	50	50
8438	ENSG00000115685	PPP1R7	2	+	241158483	241158549	241158483	241158531	241159212	241159343	8438	78121125	4,0,0	140,192,67	18,8,9	91	73	2.01762e-07	5.17014e-06	0.94,1.0,1.0	0.862,0.951,0.857	0.09	9	9
6844	ENSG00000130734	ATG4D	19	+	10546838	10547115	10546838	10547071	10547188	10547253	6844	36,52,78	0,0,0	169146116	4,7,29	117	73	2.06578e-07	5.26723e-06	1.0,1.0,1.0	0.963,0.929,0.714	0.131	13.1	13.1
3253	ENSG00000270647	TAF15	17	+	35820046	35820239	35820046	35820075	35820331	35820437	3253	23,94,56	0,0,0	81,24,43	0,6,17	237	73	2.0881e-07	5.29778e-06	1.0,1.0,1.0	1.0,0.552,0.438	0.337	33.7	33.7
7130	ENSG00000265681	RPL17	18	-	49491516	49491584	49491531	49491584	49491404	49491445	7130	22,69,71	6246107618756	132,160,74	705954035114	88	73	2.13775e-07	5.39703e-06	0.003,0.005,0.007	0.015,0.024,0.012	-0.012	-1.2	1.2
5320	ENSG00000156253	RWDD2B	21	-	29008239	29008621	29008394	29008621	29007760	29008123	5320	13,30,43	0,17,11	4,2,32	0,0,0	228	73	2.32236e-07	5.83435e-06	1.0,0.361,0.556	1.0,1.0,1.0	-0.361	-36.1	36.1
3799	ENSG00000104969	SGTA	19	-	2768964	2769091	2768968	2769091	2767579	2767686	3799	3,0,12	17,27,56	0,0,0	53,89,99	77	73	2.36471e-07	5.91179e-06	0.143,0.0,0.169	0.0,0.0,0.0	0.104	10.4	10.4
5646	ENSG00000103253	HAGHL	16	+	729008	729092	729008	729088	729287	729715	5646	9,34,25	43,269,69	0,0,0	19,14,9	77	73	2.41312e-07	6.00352e-06	0.166,0.107,0.256	0.0,0.0,0.0	0.176	17.6	17.6
5995	ENSG00000126581	BECN1	17	-	42823704	42823879	42823747	42823879	42820773	42820841	5995	10,15,0	8,22,4	0,4,0	26,29,62	116	73	2.64344e-07	6.54475e-06	0.44,0.3,0.0	0.0,0.08,0.0	0.22	22	22
318	ENSG00000110717	NDUFS8	11	+	68032285	68032523	68032285	68032336	68032922	68033012	318	23,80,23	334448502	2,5,27	375312310	260	73	2.72257e-07	6.70826e-06	0.019,0.048,0.013	0.001,0.004,0.024	0.017	1.7	1.7
8065	ENSG00000164068	RNF123	3	+	49716392	49716477	49716392	49716457	49720510	49720653	8065	43,56,88	0,0,0	53,22,115	0,15,14	93	73	2.92513e-07	7.17287e-06	1.0,1.0,1.0	1.0,0.535,0.866	0.2	20	20
2077	ENSG00000144034	TPRKB	2	-	73734431	73734591	73734527	73734591	73732162	73732285	2077	131229138	0,1,0	356263416	0,25,14	169	73	3.05543e-07	7.45671e-06	1.0,0.99,1.0	1.0,0.82,0.928	0.081	8.1	8.1
2634	ENSG00000167272	POP5	12	-	120580995	120581257	120581114	120581257	120579773	120579923	2634	17,5,10	79,65,123	18,16,72	86,26,45	192	73	3.52985e-07	8.57368e-06	0.076,0.028,0.03	0.074,0.19,0.378	-0.169	-16.9	16.9
1176	ENSG00000234741	GAS5	1	-	173864483	173864704	173864674	173864704	173864256	173864304	1176	148024942538	41,48,125	216718891826	186,88,101	264	73	3.7173e-07	8.9864e-06	0.909,0.935,0.849	0.763,0.856,0.833	0.08	8	8
2058	ENSG00000149923	PPP4C	16	+	30076004	30076145	30076004	30076094	30076314	30076475	2058	23,3,8	307600371	22,45,36	497472398	124	73	3.85559e-07	9.27695e-06	0.042,0.003,0.013	0.025,0.053,0.051	-0.024	-2.4	2.4
1138	ENSG00000039650	PNKP	19	-	49861607	49861881	49861771	49861881	49861448	49861510	1138	104196203	0,0,0	111,64,62	4,0,12	237	73	3.90016e-07	9.30607e-06	1.0,1.0,1.0	0.895,1.0,0.614	0.164	16.4	16.4
1223	ENSG00000256269	HMBS	11	+	119092124	119092523	119092124	119092163	119092757	119092811	1223	105351188	8,0,16	134104111	0,0,0	433	73	3.92191e-07	9.30607e-06	0.689,1.0,0.665	1.0,1.0,1.0	-0.215	-21.5	21.5
8623	ENSG00000023572	GLRX2	1	-	193105196	193105431	193105263	193105431	193101140	193101204	8623	0,0,5	61,41,72	24,1,19	77,64,96	140	73	3.92217e-07	9.30607e-06	0.0,0.0,0.035	0.14,0.008,0.094	-0.069	-6.9	6.9
3111	ENSG00000132305	IMMT	2	-	86161951	86162079	86161975	86162079	86159535	86159671	3111	0,35,22	19,49,43	0,0,3	14,22,46	97	73	3.96221e-07	9.35774e-06	0.0,0.35,0.278	0.0,0.0,0.047	0.194	19.4	19.4
6706	ENSG00000147687	TATDN1	8	-	124504270	124504347	124504274	124504347	124503839	124503951	6706	32,44,63	0,0,0	36,35,10	13,0,3	77	73	3.9862e-07	9.37123e-06	1.0,1.0,1.0	0.724,1.0,0.76	0.172	17.2	17.2
2345	ENSG00000248333	CDK11B	1	-	1652438	1652566	1652468	1652566	1649498	1649637	2345	52114124	0,0,23	193160136	0,0,0	103	73	4.01989e-07	9.40729e-06	1.0,1.0,0.793	1.0,1.0,1.0	-0.069	-6.9	6.9
8745	ENSG00000108465	CDK5RAP3	17	+	47973930	47974035	47973930	47974031	47974399	47975337	8745	0,16,10	55,63,27	0,0,0	30,28,23	77	73	4.05986e-07	9.45762e-06	0.0,0.194,0.26	0.0,0.0,0.0	0.151	15.1	15.1
7782	ENSG00000004142	POLDIP2	17	-	28353132	28353316	28353240	28353316	28352911	28353019	7782	0,6,1	108,132,88	0,29,7	60,102,91	181	73	4.09911e-07	9.50586e-06	0.0,0.018,0.005	0.0,0.103,0.03	-0.037	-3.7	3.7
6857	ENSG00000167543	TP53I13	17	+	29567179	29567411	29567179	29567203	29568277	29568548	6857	12,41,6	0,13,8	14,3,6	0,0,0	281	73	4.21386e-07	9.72795e-06	1.0,0.45,0.163	1.0,1.0,1.0	-0.462	-46.2	46.2
1309	ENSG00000150433	TMEM218	11	-	125102636	125102809	125102733	125102809	125102131	125102317	1309	12,84,43	4,0,0	25,38,18	11,16,12	170	73	4.47921e-07	1.02942e-05	0.563,1.0,1.0	0.494,0.505,0.392	0.391	39.1	39.1
5975	ENSG00000111906	HDDC2	6	-	125292827	125292909	125292840	125292909	125277101	125277240	5975	13,5,32	96264184	2,5,0	105173106	86	73	4.66209e-07	1.06666e-05	0.103,0.016,0.129	0.016,0.024,0.0	0.069	6.9	6.9
2957	ENSG00000169714	CNBP	3	-	129171633	129171771	129171651	129171771	129171445	129171538	2957	94160125	17,35,0	152268191	0,9,5	91	73	4.75174e-07	1.08234e-05	0.816,0.786,1.0	1.0,0.96,0.968	-0.109	-10.9	10.9
5923	ENSG00000090621	PABPC4	1	-	39564422	39564542	39564470	39564542	39563835	39563922	5923	329466464	38,102,97	235174221	98,62,82	121	73	4.79552e-07	1.08748e-05	0.839,0.734,0.743	0.591,0.629,0.619	0.159	15.9	15.9
926	ENSG00000185122	HSF1	8	+	144309771	144311249	144309771	144309896	144311320	144311382	926	136338316	10,0,8	223242300	0,0,0	1426	73	4.896e-07	1.10538e-05	0.41,1.0,0.669	1.0,1.0,1.0	-0.307	-30.7	30.7
5660	ENSG00000169738	DCXR	17	-	82036181	82036308	82036190	82036308	82035878	82036063	5660	10,22,22	520672830	84,50,46	1116878904	82	73	4.9859e-07	1.12073e-05	0.017,0.028,0.023	0.063,0.048,0.043	-0.029	-2.9	2.9
526	ENSG00000119616	FCF1	14	+	74713169	74713259	74713169	74713200	74713484	74713552	526	0,0,0	8,7,9	7,17,0	11,26,5	132	73	5.15809e-07	1.15438e-05	0.0,0.0,0.0	0.26,0.266,0.0	-0.175	-17.5	17.5
2853	ENSG00000169964	TMEM42	3	+	44861868	44862116	44861868	44862015	44864196	44864343	2853	33,24,38	14,5,2	4,16,5	0,0,0	174	73	5.29234e-07	1.17417e-05	0.497,0.668,0.889	1.0,1.0,1.0	-0.315	-31.5	31.5
3211	ENSG00000147586	MRPS28	8	-	80030020	80030232	80030053	80030232	80002998	80003180	3211	78,183,70	23,33,16	75,60,76	0,0,10	106	73	5.27978e-07	1.17417e-05	0.7,0.792,0.751	1.0,1.0,0.84	-0.199	-19.9	19.9
7635	ENSG00000112110	MRPL18	6	+	159797286	159797518	159797286	159797369	159798051	159798436	7635	6449181030	3,14,16	989680886	0,0,0	222	73	5.6674e-07	1.25196e-05	0.986,0.956,0.955	1.0,1.0,1.0	-0.034	-3.4	3.4
7395	ENSG00000125731	SH2D3A	19	-	6754250	6754731	6754615	6754731	6754051	6754163	7395	224258276	0,0,0	531340339	11,12,0	438	73	5.76851e-07	1.26882e-05	1.0,1.0,1.0	0.889,0.825,1.0	0.095	9.5	9.5
1726	ENSG00000137210	TMEM14B	6	+	10755141	10755232	10755141	10755225	10770076	10770204	1726	1,34,18	0,0,0	54,53,36	19,12,0	80	73	5.80053e-07	1.27041e-05	1.0,1.0,1.0	0.722,0.801,1.0	0.159	15.9	15.9
5368	ENSG00000141741	MIEN1	17	-	39730168	39730291	39730193	39730291	39729684	39729761	5368	4,12,19	207337406	34,45,22	421308281	98	73	6.42535e-07	1.40127e-05	0.014,0.026,0.034	0.057,0.098,0.055	-0.045	-4.5	4.5
674	ENSG00000145191	EIF2B5	3	+	184143051	184143565	184143051	184143142	184144098	184144224	674	238282277	0,0,0	498343492	0,13,10	496	73	6.59993e-07	1.43325e-05	1.0,1.0,1.0	1.0,0.795,0.879	0.109	10.9	10.9
4961	ENSG00000221978	CCNL2	1	-	1392678	1392803	1392789	1392803	1390765	1390865	4961	142,89,78	8,0,0	7,51,27	13,6,9	184	73	6.68729e-07	1.44609e-05	0.876,1.0,1.0	0.176,0.771,0.543	0.462	46.2	46.2
4568	ENSG00000214293	APTR	7	-	77696117	77696262	77696171	77696262	77685201	77685328	4568	13,2,16	11,7,0	50,11,10	0,0,0	127	73	7.14473e-07	1.53852e-05	0.405,0.141,1.0	1.0,1.0,1.0	-0.485	-48.5	48.5
1428	ENSG00000159314	ARHGAP27	17	-	45395965	45396117	45395982	45396117	45395743	45395849	1428	0,0,0	6,17,28	3,14,0	6,14,10	90	73	7.59039e-07	1.6263e-05	0.0,0.0,0.0	0.289,0.448,0.0	-0.246	-24.6	24.6
5272	ENSG00000104129	DNAJC17	15	-	40776189	40776401	40776195	40776401	40775552	40775596	5272	0,0,0	15,62,60	12,0,5	53,42,18	79	73	7.61582e-07	1.6263e-05	0.0,0.0,0.0	0.173,0.0,0.204	-0.126	-12.6	12.6
875	ENSG00000105723	GSK3A	19	-	42236593	42236716	42236605	42236716	42234547	42234678	875	0,8,4	76,68,158	21,16,28	125104179	85	73	7.67314e-07	1.63174e-05	0.0,0.092,0.021	0.126,0.117,0.118	-0.083	-8.3	8.3
5446	ENSG00000159352	PSMD4	1	+	151266003	151266208	151266003	151266121	151266307	151266439	5446	6,1,1	16,51,44	22,36,11	13,6,51	160	73	7.75211e-07	1.64172e-05	0.146,0.009,0.01	0.436,0.732,0.09	-0.364	-36.4	36.4
3102	ENSG00000158290	CUL4B	X	-	120538117	120538209	120538123	120538209	120536926	120537034	3102	0,0,0	3,40,42	9,10,0	5,0,13	79	73	7.88664e-07	1.65652e-05	0.0,0.0,0.0	0.625,1.0,0.0	-0.542	-54.2	54.2
4063	ENSG00000177595	PIDD1	11	-	800332	800451	800383	800451	800130	800244	4063	95110100	41,40,33	66,46,62	0,3,12	124	73	7.8631e-07	1.65652e-05	0.577,0.618,0.641	1.0,0.9,0.753	-0.272	-27.2	27.2
6845	ENSG00000130734	ATG4D	19	+	10546838	10547082	10546838	10547071	10547188	10547253	6845	6,4,4	0,0,0	26,26,34	4,7,29	84	73	8.01391e-07	1.67638e-05	1.0,1.0,1.0	0.85,0.763,0.505	0.294	29.4	29.4
7215	ENSG00000071462	WBSCR22	7	+	73692595	73693414	73692595	73692646	73693623	73693669	7215	374668418	0,0,0	697739491	7,0,13	841	73	8.96905e-07	1.86855e-05	1.0,1.0,1.0	0.896,1.0,0.766	0.113	11.3	11.3
352	ENSG00000197448	GSTK1	7	+	143264991	143265296	143264991	143265092	143267616	143267733	352	193413436	23,0,8	228165211	0,0,0	277	73	9.211e-07	1.91119e-05	0.689,1.0,0.935	1.0,1.0,1.0	-0.125	-12.5	12.5
6027	ENSG00000131069	ACSS2	20	+	34921785	34921992	34921785	34921866	34923322	34923431	6027	6,0,9	11,5,25	0,0,0	36,35,9	199	73	9.29792e-07	1.92145e-05	0.167,0.0,0.117	0.0,0.0,0.0	0.095	9.5	9.5
6289	ENSG00000100242	SUN2	22	-	38740888	38741050	38741006	38741050	38740266	38740432	6289	0,8,0	20,55,31	23,5,11	9,34,4	191	73	9.63517e-07	1.98314e-05	0.0,0.053,0.0	0.494,0.053,0.512	-0.335	-33.5	33.5
2196	ENSG00000099797	TECR	19	+	14564785	14564965	14564785	14564858	14565065	14565123	2196	7,8,23	0,0,0	28,82,74	35,0,31	180	73	9.73254e-07	1.99517e-05	1.0,1.0,1.0	0.245,1.0,0.492	0.421	42.1	42.1
3625	ENSG00000169696	ASPSCR1	17	+	82016940	82017113	82016940	82017088	82017308	82017403	3625	68,56,110	6,13,14	67,52,33	0,0,3	98	73	9.86799e-07	2.01488e-05	0.894,0.762,0.854	1.0,1.0,0.891	-0.127	-12.7	12.7
5420	ENSG00000102030	NAA10	X	-	153932070	153932431	153932315	153932431	153930762	153930847	5420	285317381	19,17,8	307201294	0,0,7	318	73	9.92494e-07	2.01847e-05	0.775,0.811,0.916	1.0,1.0,0.906	-0.135	-13.5	13.5
2463	ENSG00000161939	RNASEK-C17orf49	17	+	7012634	7012777	7012634	7012761	7013665	7013742	2463	1,0,14	236466399	38,21,20	589597526	89	73	1.09266e-06	2.21339e-05	0.003,0.0,0.028	0.05,0.028,0.03	-0.026	-2.6	2.6
2004	ENSG00000158545	ZC3H18	16	+	88625201	88625361	88625201	88625267	88627621	88627782	2004	0,0,0	12,24,42	0,7,20	38,46,31	167	73	1.11044e-06	2.24055e-05	0.0,0.0,0.0	0.0,0.062,0.22	-0.094	-9.4	9.4
1982	ENSG00000156873	PHKG2	16	+	30751105	30751603	30751105	30751217	30753231	30753297	1982	41,85,26	0,0,0	59102115	27,9,0	459	73	1.15981e-06	2.331e-05	1.0,1.0,1.0	0.258,0.643,1.0	0.366	36.6	36.6
8060	ENSG00000164068	RNF123	3	+	49712478	49712892	49712478	49712536	49713512	49713587	8060	22,99,93	12,43,36	41,30,20	0,0,3	429	73	1.1772e-06	2.3567e-05	0.238,0.281,0.305	1.0,1.0,0.531	-0.569	-56.9	56.9
4511	ENSG00000062822	POLD1	19	+	50415437	50415602	50415437	50415590	50415723	50415826	4511	0,0,0	77,102,94	9,1,6	73,52,29	85	73	1.27383e-06	2.54022e-05	0.0,0.0,0.0	0.096,0.016,0.151	-0.088	-8.8	8.8
4643	ENSG00000074582	BCS1L	2	+	218660036	218660245	218660036	218660166	218660938	218661307	4643	9,4,19	0,0,0	21,5,21	24,0,4	152	73	1.30222e-06	2.58678e-05	1.0,1.0,1.0	0.296,1.0,0.716	0.329	32.9	32.9
6167	ENSG00000162076	FLYWCH2	16	+	2883185	2883366	2883185	2883362	2895219	2895320	6167	54,94,67	0,0,0	34,74,40	20,4,0	77	73	1.36675e-06	2.70448e-05	1.0,1.0,1.0	0.617,0.946,1.0	0.146	14.6	14.6
6412	ENSG00000073060	SCARB1	12	-	124786356	124786503	124786440	124786503	124782671	124782811	6412	109171165	5,19,0	71,86,88	0,0,0	157	73	1.4108e-06	2.78091e-05	0.91,0.807,1.0	1.0,1.0,1.0	-0.094	-9.4	9.4
2348	ENSG00000161010	C5orf45	5	-	179853196	179853437	179853377	179853437	179847977	179848066	2348	10,8,6	9,21,6	3,0,0	20,17,4	254	73	1.42393e-06	2.78536e-05	0.242,0.099,0.223	0.041,0.0,0.0	0.174	17.4	17.4
3595	ENSG00000165526	RPUSD4	11	-	126209490	126209722	126209520	126209722	126205687	126205781	3595	7,8,6	7,28,50	0,0,1	14,27,22	103	73	1.4223e-06	2.78536e-05	0.415,0.168,0.078	0.0,0.0,0.031	0.21	21	21
2851	ENSG00000091640	SPAG7	17	-	4960682	4960853	4960785	4960853	4960458	4960547	2851	4,0,11	60,62,93	25,44,24	119159118	176	73	1.4614e-06	2.84778e-05	0.027,0.0,0.047	0.08,0.103,0.078	-0.062	-6.2	6.2
8174	ENSG00000163481	RNF25	2	-	218668238	218668341	218668278	218668341	218668078	218668146	8174	43,61,60	0,0,0	66,57,52	0,5,12	113	73	1.55085e-06	3.01064e-05	1.0,1.0,1.0	1.0,0.88,0.737	0.128	12.8	12.8
2222	ENSG00000007392	LUC7L	16	-	189967	190135	189980	190135	188989	189339	2222	43,79,166	0,0,0	129,99,99	13,8,0	86	73	1.56692e-06	3.03037e-05	1.0,1.0,1.0	0.894,0.913,1.0	0.064	6.4	6.4
3979	ENSG00000172590	MRPL52	14	+	22829886	22829944	22829886	22829940	22830052	22830110	3979	0,0,0	77,123,62	12,6,9	185140101	77	73	1.61457e-06	3.08756e-05	0.0,0.0,0.0	0.058,0.039,0.078	-0.058	-5.8	5.8
4309	ENSG00000111361	EIF2B1	12	-	123622635	123622761	123622646	123622761	123620405	123621920	4309	81,98,29	0,0,0	92,99,89	0,6,16	84	73	1.60352e-06	3.08756e-05	1.0,1.0,1.0	1.0,0.935,0.829	0.079	7.9	7.9
4876	ENSG00000095059	DHPS	19	-	12680149	12680325	12680195	12680325	12679800	12679922	4876	82,75,67	0,0,0	39,78,25	0,7,7	119	73	1.61418e-06	3.08756e-05	1.0,1.0,1.0	1.0,0.872,0.687	0.147	14.7	14.7
4614	ENSG00000143537	ADAM15	1	+	155058245	155058468	155058245	155058441	155058709	155058787	4614	0,8,8	137369353	24,11,14	225325174	100	73	1.62866e-06	3.10293e-05	0.0,0.016,0.016	0.072,0.024,0.055	-0.04	-4	4
7082	ENSG00000110060	PUS3	11	-	125895223	125895789	125895669	125895789	125893485	125894286	7082	10,94,55	0,4,6	57,33,61	0,0,0	519	73	1.63514e-06	3.10374e-05	1.0,0.768,0.563	1.0,1.0,1.0	-0.223	-22.3	22.3
5449	ENSG00000159352	PSMD4	1	+	151264887	151265028	151264887	151264918	151265165	151265201	5449	30,0,46	276466493	32,30,51	284281236	183	73	1.64908e-06	3.11864e-05	0.042,0.0,0.036	0.043,0.041,0.079	-0.028	-2.8	2.8
8366	ENSG00000196781	TLE1	9	-	81652183	81652288	81652213	81652288	81634096	81634301	8366	11,3,15	3,0,0	26,0,6	16,7,11	103	73	1.65956e-06	3.12693e-05	0.722,1.0,1.0	0.535,0.0,0.279	0.636	63.6	63.6
4451	ENSG00000161265	U2AF1L4	19	-	35744011	35744145	35744069	35744145	35743808	35743904	4451	1,30,6	14,41,35	0,0,2	10,36,14	131	73	1.68394e-06	3.16125e-05	0.038,0.29,0.087	0.0,0.0,0.074	0.114	11.4	11.4
4864	ENSG00000118418	HMGN3	6	-	79202055	79202155	79202093	79202155	79201248	79201726	4864	15,19,1	0,0,0	35,11,50	0,7,18	111	73	1.76089e-06	3.29364e-05	1.0,1.0,1.0	1.0,0.508,0.646	0.282	28.2	28.2
5930	ENSG00000178467	P4HTM	3	+	49002499	49006187	49002499	49002596	49006686	49007115	5930	72511101140	0,0,0	1180985881	8,0,5	3664	73	1.80862e-06	3.36997e-05	1.0,1.0,1.0	0.746,1.0,0.778	0.159	15.9	15.9
7383	ENSG00000125107	CNOT1	16	-	58531955	58532075	58531957	58532075	58530245	58530347	7383	0,6,11	10,80,48	0,0,0	30,49,58	75	73	1.81485e-06	3.36997e-05	0.0,0.068,0.182	0.0,0.0,0.0	0.083	8.3	8.3
7106	ENSG00000197956	S100A6	1	-	153536107	153536244	153536129	153536244	153535201	153535360	7106	4,11,15	0,4,5	27,36,39	0,0,0	95	73	1.84424e-06	3.41218e-05	1.0,0.679,0.697	1.0,1.0,1.0	-0.208	-20.8	20.8
5728	ENSG00000060138	YBX3	12	-	10710529	10710714	10710653	10710714	10709907	10710114	5728	52,34,33	0,0,0	109,115,79	19,7,0	197	73	1.86815e-06	3.44398e-05	1.0,1.0,1.0	0.68,0.859,1.0	0.154	15.4	15.4
8731	ENSG00000180228	PRKRA	2	-	178447455	178447586	178447504	178447586	178444421	178444500	8731	0,0,0	69,28,52	7,3,3	22,19,23	122	73	1.90781e-06	3.50449e-05	0.0,0.0,0.0	0.16,0.086,0.072	-0.106	-10.6	10.6
5130	ENSG00000159199	ATP5G1	17	+	48892816	48892910	48892816	48892840	48893408	48893456	5130	46,111,73	470843667	91,57,157	543399466	143	73	2.02002e-06	3.69736e-05	0.048,0.063,0.053	0.079,0.068,0.147	-0.043	-4.3	4.3
5034	ENSG00000177225	PDDC1	11	-	773427	773629	773521	773629	772426	772521	5034	0,0,0	15,36,17	21,0,9	23,52,48	167	73	2.06324e-06	3.75704e-05	0.0,0.0,0.0	0.285,0.0,0.076	-0.12	-12	12
7067	ENSG00000181392	SYNE4	19	-	36006422	36006671	36006601	36006671	36005332	36005437	7067	97176160	3,12,7	74,22,34	0,0,0	252	73	2.06729e-06	3.75704e-05	0.904,0.809,0.869	1.0,1.0,1.0	-0.139	-13.9	13.9
5940	ENSG00000171163	ZNF692	1	-	248856287	248856422	248856372	248856422	248855557	248855946	5940	61,63,69	4,0,0	51,53,30	4,12,6	158	73	2.16078e-06	3.91308e-05	0.876,1.0,1.0	0.855,0.671,0.698	0.217	21.7	21.7
1573	ENSG00000141002	TCF25	16	+	89908965	89909107	89908965	89909083	89910590	89910663	1573	57,89,112	1,0,9	54,62,25	11,10,8	97	73	2.20512e-06	3.9793e-05	0.977,1.0,0.904	0.787,0.824,0.702	0.189	18.9	18.9
1301	ENSG00000278615	C11orf98	11	-	62665124	62665191	62665130	62665191	62664848	62664973	1301	33,26,39	394735598	19,6,12	656473509	79	73	2.26198e-06	4.0676e-05	0.072,0.032,0.057	0.026,0.012,0.021	0.034	3.4	3.4
8404	ENSG00000188130	MAPK12	22	-	50249102	50249454	50249327	50249454	50248661	50248859	8404	6,15,19	0,23,14	20,16,26	0,1,0	298	73	2.45683e-06	4.40254e-05	1.0,0.138,0.25	1.0,0.797,1.0	-0.47	-47	47
8125	ENSG00000165416	SUGT1	13	+	52652865	52652960	52652865	52652958	52653045	52653103	8125	0,0,0	23,47,45	6,0,14	32,89,56	75	73	2.47601e-06	4.42144e-05	0.0,0.0,0.0	0.154,0.0,0.196	-0.117	-11.7	11.7
413	ENSG00000213928	IRF9	14	+	24162143	24162324	24162143	24162280	24162965	24163149	413	46,30,22	6,16,0	25,9,18	0,0,0	117	73	2.5089e-06	4.46462e-05	0.827,0.539,1.0	1.0,1.0,1.0	-0.211	-21.1	21.1
7100	ENSG00000004975	DVL2	17	-	7230045	7230155	7230057	7230155	7229807	7229943	7100	2,34,36	1,9,6	7,12,9	0,0,0	85	73	2.52531e-06	4.47828e-05	0.632,0.764,0.837	1.0,1.0,1.0	-0.256	-25.6	25.6
6121	ENSG00000256206	RP11-140L24.4	11	-	14520192	14520344	14520296	14520344	14518996	14519041	6121	11,19,12	115159156	27,69,20	193,135,99	177	73	2.63727e-06	4.66069e-05	0.038,0.047,0.031	0.055,0.174,0.077	-0.063	-6.3	6.3
1177	ENSG00000234741	GAS5	1	-	173865228	173865547	173865470	173865547	173864256	173864304	1177	71155205	0,0,6	128,191,98	14,7,14	315	73	2.75562e-06	4.85312e-05	1.0,1.0,0.888	0.679,0.863,0.619	0.242	24.2	24.2
5195	ENSG00000180817	PPA1	10	-	70206253	70206333	70206263	70206333	70204872	70204915	5195	0,56,15	467802837	3,14,4	811654580	83	73	2.84194e-06	4.988e-05	0.0,0.058,0.016	0.003,0.018,0.006	0.016	1.6	1.6
1692	ENSG00000172809	RPL38	17	+	74203703	74203790	74203703	74203736	74203917	74203958	1692	14,20,56	10,0,8	91,99,32	2,0,0	127	73	3.01836e-06	5.27955e-05	0.446,1.0,0.801	0.963,1.0,1.0	-0.239	-23.9	23.9
300	ENSG00000171298	GAA	17	+	80101810	80101925	80101810	80101890	80104554	80105132	300	0,12,11	9,12,12	0,0,0	1,4,1	108	73	3.16091e-06	5.51008e-05	0.0,0.403,0.383	0.0,0.0,0.0	0.262	26.2	26.2
179	ENSG00000182325	FBXL6	8	-	144356989	144357502	144357438	144357502	144356680	144356915	179	225319396	0,7,13	258261140	1,0,0	522	73	3.41399e-06	5.93109e-05	1.0,0.864,0.81	0.973,1.0,1.0	-0.1	-10	10
2045	ENSG00000162961	DPY30	2	-	32039592	32039805	32039732	32039805	32039424	32039492	2045	23,36,52	221187294	100,59,35	212206176	213	73	3.47795e-06	6.02179e-05	0.034,0.062,0.057	0.139,0.089,0.064	-0.046	-4.6	4.6
5870	ENSG00000125534	PPDPF	20	+	63521511	63521593	63521511	63521589	63521667	63521949	5870	62109108	94314931594	54,49,50	408371389	77	73	3.58737e-06	6.19033e-05	0.059,0.065,0.06	0.111,0.111,0.109	-0.049	-4.9	4.9
4409	ENSG00000241685	ARPC1A	7	+	99348851	99349025	99348851	99348959	99353908	99354121	4409	11,0,0	93337159	13,17,1	82145107	139	73	3.70015e-06	6.36351e-05	0.058,0.0,0.0	0.077,0.058,0.005	-0.027	-2.7	2.7
7831	ENSG00000099326	MZF1	19	-	58573054	58573575	58573372	58573575	58570993	58571429	7831	6,76,17	0,5,5	37,4,6	0,0,0	391	73	3.92288e-06	6.724e-05	1.0,0.739,0.388	1.0,1.0,1.0	-0.291	-29.1	29.1
8504	ENSG00000064932	SBNO2	19	-	1108778	1108969	1108782	1108969	1108564	1108704	8504	28,81,32	0,0,0	89,48,49	4,2,12	77	73	3.99338e-06	6.82202e-05	1.0,1.0,1.0	0.955,0.958,0.795	0.097	9.7	9.7
5360	ENSG00000090097	PCBP4	3	-	51959894	51960320	51960188	51960320	51959576	51959651	5360	130230154	0,6,0	126,77,110	8,3,28	367	73	4.08951e-06	6.96303e-05	1.0,0.884,1.0	0.758,0.836,0.439	0.284	28.4	28.4
6605	ENSG00000159214	CCDC24	1	+	43993889	43995162	43993889	43993964	43995600	43995670	6605	74186221	0,3,7	90,52,58	0,0,0	1271	73	4.17525e-06	7.08549e-05	1.0,0.781,0.645	1.0,1.0,1.0	-0.191	-19.1	19.1
4299	ENSG00000204316	MRPL38	17	-	75904221	75904719	75904539	75904719	75902019	75902154	4299	38,29,9	117244181	73,21,40	181125109	391	73	4.19595e-06	7.09711e-05	0.057,0.022,0.009	0.07,0.03,0.064	-0.025	-2.5	2.5
4785	ENSG00000255526	NEDD8-MDP1	14	-	24218058	24218215	24218132	24218215	24217185	24217223	4785	34,73,87	52110051040	183193203	186715231183	147	73	4.27915e-06	7.21403e-05	0.031,0.035,0.04	0.046,0.059,0.079	-0.026	-2.6	2.6
8568	ENSG00000169599	NFU1	2	-	69437270	69437628	69437360	69437628	69431901	69432005	8568	12,0,28	90,33,86	1,7,3	71,80,118	163	73	4.32162e-06	7.26173e-05	0.056,0.0,0.127	0.006,0.038,0.011	0.043	4.3	4.3
58	ENSG00000197958	RPL12	9	-	127451049	127451405	127451284	127451405	127450730	127450804	58	499935846	11,16,5	1138637656	2,0,5	308	73	4.34301e-06	7.26534e-05	0.915,0.933,0.976	0.993,1.0,0.969	-0.046	-4.6	4.6
6555	ENSG00000119650	IFT43	14	+	75985779	75985955	75985779	75985840	75988884	75988977	6555	8,0,24	24,78,137	6,0,0	70,144,68	188	73	4.35211e-06	7.26534e-05	0.115,0.0,0.064	0.032,0.0,0.0	0.049	4.9	4.9
5658	ENSG00000169738	DCXR	17	-	82036687	82036763	82036720	82036763	82036190	82036308	5658	64,56,65	0,5,12	38,36,54	0,0,0	106	73	4.39766e-06	7.31753e-05	1.0,0.885,0.789	1.0,1.0,1.0	-0.109	-10.9	10.9
2079	ENSG00000144034	TPRKB	2	-	73734428	73734591	73734527	73734591	73732162	73732285	2079	221356232	0,1,0	728522705	0,25,14	172	73	4.51845e-06	7.4942e-05	1.0,0.993,1.0	1.0,0.899,0.955	0.046	4.6	4.6
2714	ENSG00000170037	CNTROB	17	+	7944122	7944248	7944122	7944225	7944475	7944638	2714	23,28,66	0,0,0	17,47,77	4,0,12	96	73	4.60495e-06	7.61302e-05	1.0,1.0,1.0	0.764,1.0,0.83	0.135	13.5	13.5
2586	ENSG00000141378	PTRH2	17	-	59707370	59707598	59707379	59707598	59697305	59697978	2586	163197114	20,15,0	292201184	4,6,1	82	73	4.7493e-06	7.80133e-05	0.879,0.921,1.0	0.985,0.968,0.994	-0.049	-4.9	4.9
6531	ENSG00000160410	SHKBP1	19	+	40577556	40577709	40577556	40577630	40578153	40578212	6531	13,35,16	35,50,48	0,5,0	29,16,11	152	73	4.73734e-06	7.80133e-05	0.151,0.252,0.138	0.0,0.13,0.0	0.137	13.7	13.7
6866	ENSG00000104872	PIH1D1	19	-	49449339	49449654	49449474	49449654	49448000	49448062	6866	26,20,11	133318226	0,0,4	106,94,143	208	73	4.81765e-06	7.88833e-05	0.064,0.022,0.017	0.0,0.0,0.01	0.031	3.1	3.1
6685	ENSG00000170791	CHCHD7	8	+	56211788	56212174	56211788	56211837	56214597	56214667	6685	0,0,0	35,52,22	0,0,22	2,29,17	410	73	4.89685e-06	7.99248e-05	0.0,0.0,0.0	0.0,0.0,0.187	-0.062	-6.2	6.2
7849	ENSG00000170412	GPRC5C	17	+	74439744	74440827	74439744	74440046	74443817	74443912	7849	425919964	0,6,0	530469537	4,9,10	854	73	4.96362e-06	8.07573e-05	1.0,0.929,1.0	0.919,0.817,0.821	0.124	12.4	12.4
1980	ENSG00000156873	PHKG2	16	+	30751105	30751259	30751105	30751217	30751548	30751603	1980	17,22,11	0,0,0	9,22,23	0,3,8	115	73	5.18644e-06	8.41155e-05	1.0,1.0,1.0	1.0,0.823,0.646	0.177	17.7	17.7
8415	ENSG00000158805	ZNF276	16	+	89727278	89727357	89727278	89727325	89729234	89729318	8415	2,2,14	12,1,0	0,2,0	20,10,9	105	73	5.21473e-06	8.43076e-05	0.104,0.582,1.0	0.0,0.122,0.0	0.521	52.1	52.1
2488	ENSG00000160447	PKN3	9	+	128720202	128720283	128720202	128720239	128720393	128720918	2488	138191187	0,20,8	48,58,76	0,0,0	117	73	5.53583e-06	8.92174e-05	1.0,0.856,0.936	1.0,1.0,1.0	-0.069	-6.9	6.9
256	ENSG00000197217	ENTPD4	8	-	23441568	23441723	23441592	23441723	23439748	23439915	256	1,14,11	0,0,0	0,14,1	6,6,0	97	73	5.62104e-06	9.03067e-05	1.0,1.0,1.0	0.0,0.637,1.0	0.454	45.4	45.4
7059	ENSG00000002822	MAD1L1	7	-	2225405	2225550	2225409	2225550	2222574	2222754	7059	0,0,0	8,12,19	0,10,16	26,16,0	77	73	5.70175e-06	9.13171e-05	0.0,0.0,0.0	0.0,0.372,1.0	-0.457	-45.7	45.7
2846	ENSG00000166855	CLPX	15	-	65156777	65156932	65156843	65156932	65155691	65155856	2846	6,0,0	24,54,84	17,11,3	62,26,55	139	73	6.45475e-06	0.000103055	0.116,0.0,0.0	0.126,0.182,0.028	-0.073	-7.3	7.3
8848	ENSG00000245910	SNHG6	8	-	66926197	66926398	66926377	66926398	66922613	66922725	8848	10,19,23	0,0,0	101,36,38	0,5,8	253	73	6.61774e-06	0.000105329	1.0,1.0,1.0	1.0,0.675,0.578	0.249	24.9	24.9
3451	ENSG00000100142	POLR2F	22	+	37956772	37956901	37956772	37956842	37959345	37959476	3451	9115106	426735561	149,27,35	1191816898	132	73	6.70708e-06	0.00010642	0.012,0.08,0.095	0.065,0.018,0.021	0.028	2.8	2.8
5984	ENSG00000204371	EHMT2	6	-	31884890	31885016	31884911	31885016	31884644	31884799	5984	7,13,11	31,30,66	0,0,0	3,7,6	94	73	6.7852e-06	0.000107328	0.149,0.252,0.115	0.0,0.0,0.0	0.172	17.2	17.2
8323	ENSG00000188542	DUSP28	2	+	240560301	240561077	240560301	240560456	240561329	240564014	8323	22136122	0,0,0	12,6,43	2,0,5	694	73	6.91767e-06	0.000109086	1.0,1.0,1.0	0.387,1.0,0.475	0.379	37.9	37.9
5097	ENSG00000115970	THADA	2	-	43292072	43292222	43292103	43292222	43291695	43291768	5097	0,0,0	20,16,5	0,2,29	39,0,0	104	73	6.98338e-06	0.000109785	0.0,0.0,0.0	0.0,1.0,1.0	-0.667	-66.7	66.7
1775	ENSG00000138095	LRPPRC	2	-	43896418	43896655	43896633	43896655	43894544	43894629	1775	33,45,46	101250253	109,50,38	124166127	288	73	7.43131e-06	0.000116419	0.076,0.044,0.044	0.182,0.071,0.07	-0.053	-5.3	5.3
3655	ENSG00000136718	IMP4	2	+	130344628	130344725	130344628	130344712	130345375	130345485	3655	0,4,3	128190156	13,0,9	88,55,105	86	73	7.45082e-06	0.000116419	0.0,0.018,0.016	0.111,0.0,0.068	-0.048	-4.8	4.8
2931	ENSG00000013375	PGM3	6	-	83174245	83174487	83174373	83174487	83171936	83172059	2931	0,0,2	25,44,67	1,39,0	18,23,14	201	73	7.52007e-06	0.000116916	0.0,0.0,0.011	0.02,0.381,0.0	-0.13	-13	13
4620	ENSG00000241553	ARPC4	3	+	9803842	9804013	9803842	9804012	9806209	9806442	4620	94,141,76	21,15,27	157137115	13,6,7	74	73	7.55103e-06	0.000116916	0.815,0.903,0.735	0.923,0.957,0.942	-0.123	-12.3	12.3
6216	ENSG00000008283	CYB561	17	-	63436006	63436152	63436053	63436152	63435687	63435791	6216	0,11,8	10,23,48	0,1,0	3,38,23	120	73	7.55046e-06	0.000116916	0.0,0.225,0.092	0.0,0.016,0.0	0.1	10	10
6054	ENSG00000104907	TRMT1	19	-	13116135	13116340	13116145	13116340	13115996	13116052	6054	0,1,4	41,119,87	24,1,14	187,107,91	83	73	8.02012e-06	0.000123805	0.0,0.007,0.039	0.101,0.008,0.119	-0.061	-6.1	6.1
2587	ENSG00000110711	AIP	11	+	67490321	67490457	67490321	67490449	67490787	67490886	2587	206367264	0,0,0	323221199	18,2,6	81	73	8.14062e-06	0.000125287	1.0,1.0,1.0	0.942,0.99,0.968	0.033	3.3	3.3
7355	ENSG00000101182	PSMA7	20	-	62139695	62139905	62139780	62139905	62139074	62139197	7355	37,77,98	6861140848	163136139	1495948894	158	73	8.36182e-06	0.000128306	0.024,0.03,0.051	0.048,0.062,0.067	-0.024	-2.4	2.4
8299	ENSG00000113312	TTC1	5	+	160009112	160009193	160009112	160009190	160010499	160010858	8299	19,61,27	0,0,0	166,85,47	0,12,12	76	73	8.79744e-06	0.000134588	1.0,1.0,1.0	1.0,0.872,0.79	0.113	11.3	11.3
48	ENSG00000204310	AGPAT1	6	-	32171249	32171505	32171296	32171505	32170936	32171070	48	0,3,0	33,79,43	6,0,10	9,48,23	120	73	9.17798e-06	0.000139992	0.0,0.023,0.0	0.289,0.0,0.209	-0.158	-15.8	15.8
1046	ENSG00000079432	CIC	19	+	42294172	42294304	42294172	42294298	42294603	42294735	1046	50,56,57	2,12,5	23,23,20	20,20,5	79	73	9.29723e-06	0.00014139	0.959,0.812,0.913	0.515,0.515,0.787	0.289	28.9	28.9
3628	ENSG00000156697	UTP14A	X	+	129925897	129926112	129925897	129926024	129926239	129926339	3628	96243239	0,0,18	298230229	0,0,0	161	73	9.61625e-06	0.000145809	1.0,1.0,0.858	1.0,1.0,1.0	-0.047	-4.7	4.7
5650	ENSG00000148291	SURF2	9	+	133356913	133357072	133356913	133357068	133357710	133357814	5650	6,6,1	13,48,22	2,0,0	90,62,29	77	73	9.9175e-06	0.000149808	0.304,0.106,0.041	0.021,0.0,0.0	0.143	14.3	14.3
7294	ENSG00000115677	HDLBP	2	-	241230068	241230269	241230152	241230269	241229832	241229961	7294	14,38,33	467922654	31,44,39	535352429	157	73	9.9385e-06	0.000149808	0.014,0.019,0.023	0.026,0.055,0.041	-0.022	-2.2	2.2
1981	ENSG00000156873	PHKG2	16	+	30751105	30751281	30751105	30751217	30751548	30751603	1981	24,52,42	0,0,0	13,50,27	0,3,8	137	73	1.01482e-05	0.00015209	1.0,1.0,1.0	1.0,0.899,0.643	0.153	15.3	15.3
8432	ENSG00000203875	SNHG5	6	-	85677794	85678032	85677953	85678032	85677423	85677492	8432	366800635	48,60,83	13418231056	37,62,66	232	73	1.01492e-05	0.00015209	0.706,0.808,0.707	0.919,0.807,0.834	-0.113	-11.3	11.3
1485	ENSG00000100028	SNRPD3	22	+	24556006	24556228	24556006	24556057	24557656	24557800	1485	69,97,63	13,0,12	35,75,71	0,0,2	244	73	1.01921e-05	0.000152288	0.614,1.0,0.611	1.0,1.0,0.914	-0.23	-23	23
3165	ENSG00000126522	ASL	7	+	66089090	66089335	66089090	66089175	66089611	66089695	3165	65126114	12,0,5	61,70,19	0,0,0	233	73	1.0378e-05	0.000154614	0.629,1.0,0.877	1.0,1.0,1.0	-0.165	-16.5	16.5
4016	ENSG00000149809	TM7SF2	11	+	65112810	65112894	65112810	65112865	65113219	65113414	4016	0,3,6	9,96,94	6,8,7	20,16,1	102	73	1.08374e-05	0.000160524	0.0,0.022,0.044	0.177,0.264,0.834	-0.403	-40.3	40.3
8635	ENSG00000177238	TRIM72	16	+	31222826	31222945	31222826	31222911	31224180	31231537	8635	16,58,15	3,8,0	34,52,28	0,0,0	107	73	1.083e-05	0.000160524	0.784,0.832,1.0	1.0,1.0,1.0	-0.128	-12.8	12.8
3629	ENSG00000156697	UTP14A	X	+	129925897	129926112	129925897	129926020	129926239	129926339	3629	104281239	0,0,0	301230239	0,21,1	165	73	1.08867e-05	0.00016079	1.0,1.0,1.0	1.0,0.829,0.991	0.06	6	6
6551	ENSG00000162144	CYB561A3	11	-	61352955	61353139	61352984	61353139	61350990	61351147	6551	7,12,0	37,62,36	0,0,0	23,22,25	102	73	1.12496e-05	0.000165672	0.119,0.122,0.0	0.0,0.0,0.0	0.08	8	8
6208	ENSG00000186577	C6orf1	6	-	34247680	34247864	34247740	34247864	34247466	34247492	6208	10,51,50	5,5,2	14,29,16	0,0,0	133	73	1.13496e-05	0.000166667	0.523,0.848,0.932	1.0,1.0,1.0	-0.232	-23.2	23.2
5323	ENSG00000111364	DDX55	12	+	123613169	123613408	123613169	123613252	123615184	123615316	5323	1,0,3	21,16,8	30,0,20	37,19,15	229	73	1.14792e-05	0.000168088	0.015,0.0,0.107	0.205,0.0,0.298	-0.127	-12.7	12.7
8590	ENSG00000117308	GALE	1	-	23796508	23796782	23796696	23796782	23796150	23796265	8590	220551426	5,13,28	200201214	45,40,12	261	73	1.16006e-05	0.000169381	0.925,0.922,0.81	0.554,0.584,0.833	0.229	22.9	22.9
4130	ENSG00000240682	ISY1	3	-	129134827	129134954	129134831	129134954	129134073	129134195	4130	12,1,0	93,68,91	15,15,12	77,62,77	77	73	1.20239e-05	0.000175063	0.109,0.014,0.0	0.156,0.187,0.129	-0.116	-11.6	11.6
5085	ENSG00000107281	NPDC1	9	-	137040511	137040598	137040513	137040598	137040356	137040436	5085	0,0,0	76166140	4,1,12	74,114,81	75	73	1.2224e-05	0.000177474	0.0,0.0,0.0	0.05,0.008,0.126	-0.061	-6.1	6.1
6953	ENSG00000141556	TBCD	17	+	82932657	82932855	82932657	82932735	82937270	82937360	6953	0,11,14	69119116	18,13,21	105,56,45	193	73	1.23435e-05	0.000178702	0.0,0.034,0.044	0.061,0.081,0.15	-0.071	-7.1	7.1
3672	ENSG00000072786	STK10	5	-	172060966	172061168	172061138	172061168	172057348	172057473	3672	0,4,0	7,11,28	10,23,2	24,5,4	245	73	1.255e-05	0.000181179	0.0,0.098,0.0	0.11,0.578,0.13	-0.24	-24	24
4677	ENSG00000116786	PLEKHM2	1	+	15728266	15728357	15728266	15728313	15728668	15728733	4677	26,87,63	0,0,0	63,28,57	0,5,7	117	73	1.26125e-05	0.00018157	1.0,1.0,1.0	1.0,0.777,0.836	0.129	12.9	12.9
8053	ENSG00000180891	CUEDC1	17	-	57867240	57867418	57867337	57867418	57866473	57866544	8053	13,12,17	0,0,0	17,20,11	5,0,3	170	73	1.26755e-05	0.000181967	1.0,1.0,1.0	0.593,1.0,0.612	0.265	26.5	26.5
1590	ENSG00000141994	DUS3L	19	-	5786748	5787171	5787060	5787171	5786466	5786542	1590	146140133	11,0,3	58,101,94	12,13,13	385	73	1.37242e-05	0.000195924	0.716,1.0,0.894	0.478,0.596,0.578	0.319	31.9	31.9
4300	ENSG00000204316	MRPL38	17	-	75904225	75904719	75904539	75904719	75902019	75902154	4300	38,29,9	117244181	71,18,40	181125109	387	73	1.36989e-05	0.000195924	0.058,0.022,0.009	0.069,0.026,0.065	-0.024	-2.4	2.4
654	ENSG00000188603	CLN3	16	-	28491481	28491835	28491713	28491835	28489289	28489386	654	10,70,20	0,6,6	55,14,51	0,0,1	305	73	1.42748e-05	0.000203101	1.0,0.736,0.444	1.0,1.0,0.924	-0.248	-24.8	24.8
8551	ENSG00000068137	PLEKHH3	17	-	42669917	42670376	42669942	42670376	42669429	42669621	8551	38,141,96	10,21,39	6,21,27	8,40,16	98	73	1.43062e-05	0.000203101	0.739,0.833,0.647	0.358,0.281,0.557	0.341	34.1	34.1
7313	ENSG00000169718	DUS1L	17	-	82060599	82060780	82060700	82060780	82059947	82060093	7313	32,21,36	132373218	98,80,35	308288244	174	73	1.45655e-05	0.00020621	0.092,0.023,0.065	0.118,0.104,0.057	-0.033	-3.3	3.3
5027	ENSG00000102901	CENPT	16	-	67832227	67832545	67832454	67832545	67832011	67832108	5027	16,28,51	10,0,3	38,37,38	0,0,0	300	73	1.46937e-05	0.000207453	0.28,1.0,0.805	1.0,1.0,1.0	-0.305	-30.5	30.5
6313	ENSG00000139637	C12orf10	12	+	53303033	53303193	53303033	53303172	53305907	53306060	6313	196196224	0,0,25	151155143	0,0,0	94	73	1.49112e-05	0.000209945	1.0,1.0,0.874	1.0,1.0,1.0	-0.042	-4.2	4.2
2716	ENSG00000170037	CNTROB	17	+	7934137	7934226	7934137	7934222	7934464	7934546	2716	0,0,0	4,4,30	1,6,6	18,29,3	77	73	1.50501e-05	0.00021132	0.0,0.0,0.0	0.05,0.164,0.655	-0.29	-29	29
123	ENSG00000182872	RBM10	X	+	47185715	47185795	47185715	47185790	47186064	47186171	123	11,26,21	105188173	6,5,18	325147189	78	73	1.51385e-05	0.00021198	0.089,0.115,0.102	0.017,0.031,0.082	0.059	5.9	5.9
8402	ENSG00000188130	MAPK12	22	-	50256787	50256964	50256934	50256964	50256569	50256646	8402	58,70,57	53,70,84	15,11,1	3,0,0	220	73	1.54214e-05	0.000215354	0.266,0.249,0.184	0.624,1.0,1.0	-0.642	-64.2	64.2
8483	ENSG00000164609	SLU7	5	-	160418595	160419081	160419022	160419081	160415124	160415310	8483	0,0,0	4,5,22	22,0,0	16,11,4	500	73	1.54731e-05	0.000215383	0.0,0.0,0.0	0.167,0.0,0.0	-0.056	-5.6	5.6
99	ENSG00000211450	C11orf31	11	+	57742116	57742247	57742116	57742227	57742862	57743038	99	517882863	14,19,33	500328241	6,0,3	93	73	1.55076e-05	0.000215383	0.967,0.973,0.954	0.985,1.0,0.984	-0.025	-2.5	2.5
8648	ENSG00000090581	GNPTG	16	+	1352238	1352413	1352238	1352306	1361742	1361797	8648	27,1,0	60,55,73	0,0,1	35,64,40	180	73	1.5711e-05	0.000217618	0.154,0.007,0.0	0.0,0.0,0.01	0.05	5	5
461	ENSG00000133195	SLC39A11	17	-	72947730	72947875	72947751	72947875	72849633	72849804	461	0,15,8	16,1,15	0,0,0	11,16,8	94	73	1.5764e-05	0.000217764	0.0,0.921,0.293	0.0,0.0,0.0	0.405	40.5	40.5
2390	ENSG00000197142	ACSL5	10	+	112421946	112422039	112421946	112422035	112422324	112422441	2390	12,5,29	159283245	0,0,0	39,29,40	77	73	1.58583e-05	0.000218478	0.067,0.016,0.101	0.0,0.0,0.0	0.061	6.1	6.1
2728	ENSG00000111666	CHPT1	12	+	101726293	101726497	101726293	101726404	101728900	101729074	2728	12,34,15	5,13,10	15,23,59	43,37,77	166	73	1.60538e-05	0.000220579	0.513,0.535,0.397	0.133,0.215,0.252	0.282	28.2	28.2
2912	ENSG00000100519	PSMC6	14	+	52707201	52707529	52707201	52707304	52708308	52708388	2912	0,0,1	19,20,32	4,5,14	35,10,47	298	73	1.61378e-05	0.000221139	0.0,0.0,0.008	0.027,0.109,0.068	-0.065	-6.5	6.5
5252	ENSG00000103005	USB1	16	+	58002478	58002663	58002478	58002645	58009928	58010112	5252	0,0,1	37,23,29	10,5,0	33,30,26	91	73	1.61952e-05	0.000221334	0.0,0.0,0.027	0.196,0.118,0.0	-0.096	-9.6	9.6
646	ENSG00000129103	SUMF2	7	+	56068481	56068647	56068481	56068638	56072996	56073111	646	19,24,13	128155159	16,0,0	173,122,97	82	73	1.68673e-05	0.000229906	0.117,0.121,0.068	0.076,0.0,0.0	0.077	7.7	7.7
387	ENSG00000167508	MVD	16	-	88657734	88658029	88657914	88658029	88657435	88657582	387	7,22,16	70106134	9,0,1	83,111,68	253	73	1.73299e-05	0.000235586	0.028,0.057,0.033	0.03,0.0,0.004	0.028	2.8	2.8
4352	ENSG00000168439	STIP1	11	+	64203449	64203682	64203449	64203622	64204053	64204408	4352	48,32,63	435641563	65,76,88	527414510	133	73	1.77042e-05	0.000238788	0.057,0.027,0.058	0.063,0.092,0.087	-0.033	-3.3	3.3
7677	ENSG00000143774	GUK1	1	+	228145510	228145649	228145510	228145624	228146025	228146067	7677	1,38,32	152296227	29,16,25	793368516	98	73	1.76853e-05	0.000238788	0.005,0.087,0.095	0.027,0.031,0.035	0.031	3.1	3.1
832	ENSG00000164880	INTS1	7	-	1472242	1472386	1472272	1472386	1471570	1471641	832	6,2,2	130242174	12,7,16	241106137	103	73	1.77052e-05	0.000238788	0.032,0.006,0.008	0.034,0.045,0.076	-0.036	-3.6	3.6
1585	ENSG00000204839	MROH6	8	-	143568123	143568261	143568141	143568261	143567785	143567888	1585	1,12,5	37,72,35	24,5,6	8,3,18	91	73	1.80352e-05	0.000242238	0.021,0.118,0.103	0.706,0.572,0.211	-0.416	-41.6	41.6
2923	ENSG00000214078	CPNE1	20	-	35632162	35632385	35632310	35632385	35631944	35632025	2923	218232334	3,17,13	461334255	45,48,22	221	73	1.80609e-05	0.000242238	0.96,0.818,0.895	0.772,0.697,0.793	0.137	13.7	13.7
8334	ENSG00000130816	DNMT1	19	-	10142027	10142220	10142079	10142220	10141104	10141189	8334	61161136	0,0,0	166146194	6,13,0	125	73	1.81028e-05	0.000242238	1.0,1.0,1.0	0.942,0.868,1.0	0.063	6.3	6.3
2541	ENSG00000143578	CREB3L4	1	+	153967533	153967884	153967533	153967762	153968521	153968699	2541	9,20,8	2,0,6	3,22,8	0,0,0	195	73	1.92303e-05	0.000256056	0.628,1.0,0.333	1.0,1.0,1.0	-0.346	-34.6	34.6
3107	ENSG00000185624	P4HB	17	-	81845459	81845647	81845560	81845647	81845143	81845230	3107	93198171	75015561533	71,103,83	14311104982	174	73	1.92354e-05	0.000256056	0.049,0.051,0.045	0.02,0.038,0.034	0.018	1.8	1.8
691	ENSG00000017260	ATP2C1	3	+	131001219	131001410	131001219	131001344	131016151	131016684	691	28,83,44	5,35,5	19,41,18	32,27,21	139	73	1.9427e-05	0.000257936	0.746,0.555,0.822	0.238,0.444,0.31	0.377	37.7	37.7
5941	ENSG00000171163	ZNF692	1	-	248855366	248855458	248855379	248855458	248853936	248854051	5941	4,0,0	36,106,63	6,0,18	80,34,77	86	73	1.95057e-05	0.000258312	0.086,0.0,0.0	0.06,0.0,0.166	-0.047	-4.7	4.7
2908	ENSG00000231663	RP5-827C21.4	1	-	234373422	234373593	234373517	234373593	234372806	234373210	2908	50,106,64	0,0,0	59,49,43	0,4,6	168	73	1.95725e-05	0.000258529	1.0,1.0,1.0	1.0,0.842,0.757	0.134	13.4	13.4
4514	ENSG00000101361	NOP56	20	+	2655933	2656214	2655933	2656034	2656400	2656549	4514	275679467	81,93,108	486508405	179216237	253	73	2.05579e-05	0.000270847	0.495,0.678,0.555	0.439,0.404,0.33	0.185	18.5	18.5
3836	ENSG00000182718	ANXA2	15	-	60360930	60361054	60360940	60361054	60357145	60357236	3836	40,108,56	123519411959	31,91,40	265123802267	83	73	2.1113e-05	0.000277447	0.028,0.047,0.025	0.01,0.033,0.015	0.014	1.4	1.4
1699	ENSG00000171566	PLRG1	4	-	154547010	154547064	154547037	154547064	154546122	154546213	1699	28,67,79	0,26,0	85,61,46	0,0,0	100	73	2.13698e-05	0.000280103	1.0,0.653,1.0	1.0,1.0,1.0	-0.116	-11.6	11.6
1756	ENSG00000197114	ZGPAT	20	+	63708880	63709164	63708880	63708979	63733586	63733775	1756	59151106	0,0,0	167185106	5,9,0	258	73	2.19381e-05	0.000286818	1.0,1.0,1.0	0.904,0.853,1.0	0.081	8.1	8.1
6609	ENSG00000116729	WLS	1	-	68148417	68148660	68148562	68148660	68148135	68148199	6609	0,0,20	12,35,43	0,0,0	27,12,37	218	73	2.30287e-05	0.00030031	0.0,0.0,0.135	0.0,0.0,0.0	0.045	4.5	4.5
3912	ENSG00000133422	MORC2	22	-	30928018	30928207	30928027	30928207	30926610	30926871	3912	52,72,73	0,6,30	89,72,57	39,55,28	82	73	2.32555e-05	0.000302499	1.0,0.914,0.684	0.67,0.538,0.644	0.249	24.9	24.9
3301	ENSG00000155229	MMS19	10	-	97461495	97461896	97461827	97461896	97460906	97461007	3301	161306208	6,10,0	218,94,147	0,0,1	405	73	2.46852e-05	0.000320283	0.829,0.847,1.0	1.0,1.0,0.964	-0.096	-9.6	9.6
7280	ENSG00000175061	LRRC75A-AS1	17	+	16463163	16463317	16463163	16463247	16463718	16463986	7280	19,33,26	35,27,95	24,32,24	17,5,2	143	73	2.52756e-05	0.000327115	0.217,0.384,0.123	0.419,0.766,0.86	-0.44	-44	44
1083	ENSG00000087995	METTL2A	17	+	62440616	62440756	62440616	62440701	62444836	62444943	1083	98,46,128	0,0,0	75138133	0,18,0	128	73	2.62855e-05	0.000339328	1.0,1.0,1.0	1.0,0.814,1.0	0.062	6.2	6.2
8852	ENSG00000116212	LRRC42	1	+	53966295	53966384	53966295	53966380	53967664	53968168	8852	0,9,14	90202143	0,0,0	122,49,88	77	73	2.64006e-05	0.000339957	0.0,0.041,0.085	0.0,0.0,0.0	0.042	4.2	4.2
6827	ENSG00000109016	DHRS7B	17	+	21188710	21188863	21188710	21188855	21190947	21192030	6827	43,62,76	9,1,0	83,19,108	23,31,19	81	73	2.69599e-05	0.00034629	0.812,0.982,1.0	0.765,0.356,0.837	0.279	27.9	27.9
4385	ENSG00000102125	TAZ	X	+	154413206	154413339	154413206	154413252	154413481	154413567	4385	0,0,3	11,32,4	11,0,11	0,12,0	160	73	2.70563e-05	0.000346659	0.0,0.0,0.255	1.0,0.0,1.0	-0.582	-58.2	58.2
588	ENSG00000168303	MPLKIP	7	-	40134228	40134659	40134436	40134659	40126022	40133259	588	265495591	0,21,0	646634484	0,0,3	281	73	2.74204e-05	0.000350447	1.0,0.86,1.0	1.0,1.0,0.977	-0.039	-3.9	3.9
180	ENSG00000163382	APOA1BP	1	+	156593463	156593572	156593463	156593555	156593881	156594131	180	40,66,17	419641406	4,17,0	263177196	90	73	2.76709e-05	0.00035277	0.072,0.077,0.033	0.012,0.072,0.0	0.033	3.3	3.3
8319	ENSG00000101365	IDH3B	20	-	2659698	2660176	2660029	2660176	2659524	2659585	8319	379500419	0,0,0	729439501	7,0,11	404	73	2.78827e-05	0.000354588	1.0,1.0,1.0	0.95,1.0,0.892	0.053	5.3	5.3
1342	ENSG00000089063	TMEM230	20	-	5112742	5113049	5112955	5113049	5109331	5109445	1342	39,36,42	0,0,0	46,50,82	4,5,0	286	73	2.83897e-05	0.000360142	1.0,1.0,1.0	0.746,0.719,1.0	0.178	17.8	17.8
2922	ENSG00000214078	CPNE1	20	-	35626562	35626803	35626566	35626803	35626043	35626381	2922	41,70,26	401819723	55,22,13	970592895	77	73	2.87637e-05	0.000363985	0.088,0.075,0.033	0.051,0.034,0.014	0.032	3.2	3.2
2065	ENSG00000100284	TOM1	22	+	35321958	35322037	35321958	35322019	35323027	35323177	2065	6,31,15	0,2,0	13,13,11	6,21,0	91	73	2.93924e-05	0.000371025	1.0,0.926,1.0	0.635,0.332,1.0	0.32	32	32
2173	ENSG00000165233	CARD19	9	+	93110567	93110721	93110567	93110634	93112217	93112289	2173	126340261	0,0,0	217166199	8,8,0	160	73	3.05773e-05	0.00038409	1.0,1.0,1.0	0.925,0.904,1.0	0.057	5.7	5.7
2212	ENSG00000100412	ACO2	22	+	41515766	41515992	41515766	41515917	41517526	41517631	2212	16,6,8	63,65,99	61,49,11	135,101,85	148	73	3.056e-05	0.00038409	0.111,0.044,0.038	0.182,0.193,0.06	-0.081	-8.1	8.1
7285	ENSG00000120686	UFM1	13	+	38349998	38350227	38349998	38350055	38354238	38354296	7285	0,0,1	19,22,28	0,27,18	133,62,81	245	73	3.12989e-05	0.000392193	0.0,0.0,0.011	0.0,0.115,0.062	-0.055	-5.5	5.5
4830	ENSG00000269893	SNHG8	4	+	118278708	118279137	118278708	118278792	118279388	118279431	4830	110920642122	128113178	158511461288	208229188	418	73	3.14222e-05	0.000392777	0.602,0.761,0.676	0.571,0.466,0.545	0.152	15.2	15.2
7103	ENSG00000197956	S100A6	1	-	153536116	153536215	153536129	153536215	153535201	153535360	7103	10,29,10	0,4,5	39,60,45	0,0,0	86	73	3.23435e-05	0.00040331	1.0,0.86,0.629	1.0,1.0,1.0	-0.17	-17	17
5932	ENSG00000103245	NARFL	16	-	732296	732373	732300	732373	731564	731702	5932	2,13,0	32,43,34	0,0,2	55,47,59	77	73	3.30922e-05	0.000411644	0.056,0.223,0.0	0.0,0.0,0.031	0.083	8.3	8.3
6470	ENSG00000048140	TSPAN17	5	+	176647501	176647713	176647501	176647702	176651615	176651666	6470	1,0,1	3,10,20	1,5,12	6,0,13	84	73	3.35418e-05	0.000416227	0.225,0.0,0.042	0.127,1.0,0.445	-0.435	-43.5	43.5
8486	ENSG00000172663	TMEM134	11	-	67468016	67468092	67468027	67468092	67467500	67467563	8486	5,3,4	21,13,26	0,0,0	9,8,2	84	73	3.40952e-05	0.000422072	0.171,0.167,0.118	0.0,0.0,0.0	0.152	15.2	15.2
2973	ENSG00000068308	OTUD5	X	-	48934695	48934867	48934710	48934867	48934463	48934612	2973	0,0,1	11,46,57	0,4,16	39,49,105	88	73	3.419e-05	0.000422225	0.0,0.0,0.014	0.0,0.063,0.112	-0.054	-5.4	5.4
6831	ENSG00000104413	ESRP1	8	+	94674307	94674506	94674307	94674494	94678202	94678371	6831	12,25,53	0,0,14	41,24,7	0,0,0	85	73	3.45125e-05	0.000425184	1.0,1.0,0.765	1.0,1.0,1.0	-0.078	-7.8	7.8
1578	ENSG00000204394	VARS	6	-	31782284	31782443	31782401	31782443	31782086	31782177	1578	386710556	0,0,0	443272405	0,5,14	190	73	3.56277e-05	0.000436823	1.0,1.0,1.0	1.0,0.954,0.917	0.043	4.3	4.3
7555	ENSG00000130560	UBAC1	9	-	135945756	135945997	135945888	135945997	135945027	135945250	7555	0,0,20	75,109,79	33,3,6	56,44,38	205	73	3.55788e-05	0.000436823	0.0,0.0,0.083	0.173,0.024,0.053	-0.056	-5.6	5.6
1535	ENSG00000204525	HLA-C	6	-	31269488	31269525	31269492	31269525	31269337	31269381	1535	15,82,26	2,0,0	138,48,88	6,3,19	77	73	3.59582e-05	0.000439823	0.877,1.0,1.0	0.956,0.938,0.815	0.056	5.6	5.6
6715	ENSG00000126012	KDM5C	X	-	53195230	53195410	53195308	53195410	53194930	53195068	6715	54,42,54	0,0,0	136120237	8,5,7	151	73	3.78554e-05	0.000461926	1.0,1.0,1.0	0.892,0.921,0.942	0.082	8.2	8.2
5720	ENSG00000185043	CIB1	15	-	90233834	90234047	90233918	90234047	90233668	90233703	5720	401550555	12,31,6	1005700558	48,51,50	157	73	3.83413e-05	0.000465637	0.94,0.892,0.977	0.907,0.865,0.838	0.066	6.6	6.6
7220	ENSG00000071462	WBSCR22	7	+	73683766	73683901	73683766	73683804	73686635	73686731	7220	15,51,63	166227195	33,26,14	283184232	170	73	3.83343e-05	0.000465637	0.037,0.088,0.122	0.048,0.057,0.025	0.039	3.9	3.9
1415	ENSG00000070610	GBA2	9	-	35738751	35738903	35738792	35738903	35738493	35738632	1415	60,52,85	0,0,14	73,76,69	0,0,0	114	73	3.8933e-05	0.000470639	1.0,1.0,0.795	1.0,1.0,1.0	-0.068	-6.8	6.8
7636	ENSG00000112110	MRPL18	6	+	159797286	159797369	159797286	159797347	159798051	159798436	7636	21,99,72	0,1,13	91,39,68	0,0,0	95	73	3.89367e-05	0.000470639	1.0,0.987,0.81	1.0,1.0,1.0	-0.068	-6.8	6.8
8220	ENSG00000100823	APEX1	14	+	20455577	20455773	20455577	20455703	20455913	20456101	8220	7,23,12	400547354	9,39,0	192182147	143	73	3.92886e-05	0.000472709	0.009,0.021,0.017	0.023,0.099,0.0	-0.025	-2.5	2.5
8599	ENSG00000092841	MYL6	12	+	56158683	56159730	56158683	56158711	56159974	56160148	8599	283943504502	45,11,66	159951168311775	350240201	1092	73	3.92925e-05	0.000472709	0.808,0.964,0.82	0.753,0.765,0.797	0.092	9.2	9.2
6089	ENSG00000100722	ZC3H14	14	+	88602827	88603060	88602827	88603045	88607242	88607363	6089	16,89,57	0,13,0	21,34,8	10,8,8	88	73	3.96236e-05	0.000475577	1.0,0.85,1.0	0.635,0.779,0.453	0.328	32.8	32.8
6873	ENSG00000138074	SLC5A6	2	-	27201660	27201847	27201665	27201847	27201349	27201453	6873	0,6,16	22,78,52	1,0,2	58,33,45	78	73	4.06873e-05	0.000487202	0.0,0.067,0.224	0.016,0.0,0.04	0.078	7.8	7.8
5250	ENSG00000103005	USB1	16	+	58001406	58001588	58001406	58001581	58002478	58002645	5250	0,9,15	45,19,68	0,0,4	31,59,56	80	73	4.07888e-05	0.000487279	0.0,0.302,0.168	0.0,0.0,0.061	0.136	13.6	13.6
2410	ENSG00000204387	C6orf48	6	+	31834907	31835200	31834907	31835057	31835410	31835451	2410	138525882796	37,74,65	172114031772	28,9,30	216	73	4.15137e-05	0.000494786	0.927,0.922,0.936	0.954,0.981,0.952	-0.034	-3.4	3.4
7400	ENSG00000105819	PMPCB	7	+	103299442	103299533	103299442	103299529	103300177	103300307	7400	1,1,10	14,48,54	22,17,15	44,72,25	77	73	4.35103e-05	0.000517379	0.063,0.019,0.149	0.322,0.183,0.363	-0.212	-21.2	21.2
1879	ENSG00000130299	GTPBP3	19	+	17339433	17339599	17339433	17339519	17341106	17341322	1879	28,87,78	0,16,0	24,46,67	0,0,0	153	73	4.37912e-05	0.000518313	1.0,0.722,1.0	1.0,1.0,1.0	-0.093	-9.3	9.3
3577	ENSG00000125755	SYMPK	19	-	45830051	45830204	45830053	45830204	45828969	45829205	3577	0,4,0	44146109	9,6,0	61,58,34	75	73	4.37641e-05	0.000518313	0.0,0.026,0.0	0.126,0.091,0.0	-0.064	-6.4	6.4
4993	ENSG00000121766	ZCCHC17	1	+	31346639	31346818	31346639	31346740	31348828	31348974	4993	0,0,0	44,49,83	14,0,5	107,46,26	151	73	4.42384e-05	0.000522401	0.0,0.0,0.0	0.059,0.0,0.085	-0.048	-4.8	4.8
2718	ENSG00000170037	CNTROB	17	+	7944122	7944638	7944122	7944248	7945727	7945986	2718	117172171	0,0,0	158179348	8,4,0	463	73	4.50304e-05	0.00053053	1.0,1.0,1.0	0.757,0.876,1.0	0.122	12.2	12.2
7189	ENSG00000099617	EFNA2	19	+	1295544	1295858	1295544	1295590	1298550	1298616	7189	11,91,52	0,3,0	31,91,62	12,5,6	341	73	4.63224e-05	0.0005445	1.0,0.867,1.0	0.356,0.796,0.689	0.342	34.2	34.2
7446	ENSG00000171552	BCL2L1	20	-	31721654	31722348	31721843	31722348	31664451	31666086	7446	531845725	0,13,1	580319491	5,10,17	262	73	4.64672e-05	0.000544953	1.0,0.948,0.995	0.97,0.899,0.889	0.062	6.2	6.2
1230	ENSG00000008294	SPAG9	17	-	50979745	50979917	50979761	50979917	50977107	50977221	1230	24,22,19	0,0,0	94,75,39	8,0,10	89	73	4.74248e-05	0.000554913	1.0,1.0,1.0	0.906,1.0,0.762	0.111	11.1	11.1
360	ENSG00000011243	AKAP8L	19	-	15403652	15403715	15403657	15403715	15403474	15403555	360	0,0,3	15,13,21	14,20,0	14,0,3	78	73	4.8981e-05	0.000571817	0.0,0.0,0.118	0.483,1.0,0.0	-0.455	-45.5	45.5
4321	ENSG00000071564	TCF3	19	-	1631950	1632116	1632037	1632116	1627358	1627426	4321	7,0,0	24,21,33	3,10,25	35,11,15	160	73	4.91203e-05	0.00057214	0.117,0.0,0.0	0.038,0.293,0.432	-0.215	-21.5	21.5
3719	ENSG00000114388	NPRL2	3	-	50348526	50348782	50348680	50348782	50348316	50348410	3719	47,93,112	0,0,0	100,53,41	11,0,0	227	73	4.98276e-05	0.000579062	1.0,1.0,1.0	0.745,1.0,1.0	0.085	8.5	8.5
6141	ENSG00000101782	RIOK3	18	+	23473428	23473626	23473428	23473483	23474947	23475107	6141	5,6,4	0,0,0	24,33,30	2,0,6	216	73	5.01623e-05	0.000581633	1.0,1.0,1.0	0.802,1.0,0.628	0.19	19	19
2253	ENSG00000105325	FZR1	19	+	3534420	3534522	3534420	3534513	3534794	3534836	2253	0,21,14	10,39,70	4,0,0	44,39,8	82	73	5.07416e-05	0.000587022	0.0,0.324,0.151	0.075,0.0,0.0	0.133	13.3	13.3
522	ENSG00000198131	ZNF544	19	+	58230393	58230497	58230393	58230462	58243964	58244056	522	0,0,0	4,34,11	17,0,10	77,61,93	108	73	5.28485e-05	0.00061002	0.0,0.0,0.0	0.13,0.0,0.068	-0.066	-6.6	6.6
1341	ENSG00000089063	TMEM230	20	-	5112719	5113050	5112955	5113050	5109331	5109445	1341	39,38,42	0,0,0	61,79,81	4,5,0	309	73	5.36469e-05	0.000617843	1.0,1.0,1.0	0.783,0.789,1.0	0.143	14.3	14.3
5337	ENSG00000140474	ULK3	15	-	74838265	74838344	74838269	74838344	74838151	74838192	5337	21,51,40	0,9,4	10,29,18	0,0,0	77	73	5.44049e-05	0.000625168	1.0,0.843,0.905	1.0,1.0,1.0	-0.084	-8.4	8.4
7292	ENSG00000115677	HDLBP	2	-	241230047	241230269	241230152	241230269	241229461	241229961	7292	16,38,33	467922654	31,40,39	535352429	178	73	5.58456e-05	0.000640288	0.014,0.017,0.02	0.023,0.045,0.036	-0.018	-1.8	1.8
3524	ENSG00000161513	FDXR	17	-	74864429	74864564	74864479	74864564	74864147	74864347	3524	14,2,21	134334238	12,26,9	111100109	123	73	5.70875e-05	0.000651611	0.058,0.004,0.05	0.06,0.134,0.047	-0.043	-4.3	4.3
5864	ENSG00000198856	OSTC	4	+	108650583	108650794	108650583	108650753	108655563	108655657	5864	207302437	15,7,0	421384430	0,0,0	114	73	5.70762e-05	0.000651611	0.898,0.965,1.0	1.0,1.0,1.0	-0.046	-4.6	4.6
1888	ENSG00000168000	BSCL2	11	-	62705300	62705617	62705467	62705617	62702467	62702549	1888	68130124	5,3,4	151178164	2,0,0	240	73	5.78508e-05	0.000658856	0.805,0.929,0.904	0.958,1.0,1.0	-0.107	-10.7	10.7
7884	ENSG00000122140	MRPS2	9	+	135500997	135501326	135500997	135501123	135501843	135501973	7884	10,16,15	161,163,77	0,1,0	74,80,71	276	73	5.85234e-05	0.000665039	0.016,0.025,0.049	0.0,0.003,0.0	0.029	2.9	2.9
1811	ENSG00000009844	VTA1	6	+	142147161	142147399	142147161	142147270	142166227	142166322	1811	68,71,16	0,0,0	67,45,25	12,0,0	202	73	5.93506e-05	0.000672947	1.0,1.0,1.0	0.669,1.0,1.0	0.11	11	11
3123	ENSG00000142541	RPL13A	19	+	49489849	49489922	49489849	49489912	49490231	49490297	3123	59461211910804	57197174	508440213832	39,12,45	83	73	6.06818e-05	0.000685078	0.989,0.982,0.982	0.991,0.997,0.987	-0.007	-0.7	0.7
5448	ENSG00000159352	PSMD4	1	+	151254757	151254808	151254757	151254803	151262160	151262910	5448	473703638	20,22,0	417328407	0,0,0	78	73	6.06879e-05	0.000685078	0.957,0.968,1.0	1.0,1.0,1.0	-0.025	-2.5	2.5
1015	ENSG00000138119	MYOF	10	-	93323072	93323173	93323077	93323173	93319871	93320013	1015	28,36,21	95130142	2,15,15	82150109	78	73	6.14189e-05	0.000690939	0.216,0.206,0.122	0.022,0.086,0.114	0.107	10.7	10.7
7382	ENSG00000125107	CNOT1	16	-	58536967	58537220	58536988	58537220	58534146	58534395	7382	7,10,6	34,66,49	2,0,0	46,9,12	94	73	6.14767e-05	0.000690939	0.138,0.105,0.087	0.033,0.0,0.0	0.099	9.9	9.9
5883	ENSG00000090615	GOLGA3	12	-	132775065	132775305	132775140	132775305	132774156	132774320	5883	0,0,0	4,18,12	9,0,3	0,6,1	148	73	6.25908e-05	0.00070192	0.0,0.0,0.0	1.0,0.0,0.597	-0.532	-53.2	53.2
141	ENSG00000148498	PARD3	10	-	34337274	34337426	34337364	34337426	34336198	34336243	141	18,48,51	0,13,0	159,50,37	0,0,0	163	73	6.30375e-05	0.000705387	1.0,0.623,1.0	1.0,1.0,1.0	-0.126	-12.6	12.6
4105	ENSG00000057935	MTA3	2	+	42708873	42709096	42708873	42709014	42718987	42719074	4105	17,52,58	0,0,14	32,64,18	0,0,0	155	73	6.34613e-05	0.000708582	1.0,1.0,0.661	1.0,1.0,1.0	-0.113	-11.3	11.3
7198	ENSG00000229117	RPL41	12	+	56116774	56116829	56116774	56116799	56117188	56117211	7198	77,78,62	550085548521	156113127	794052775300	103	73	6.84893e-05	0.00076306	0.01,0.006,0.005	0.014,0.015,0.017	-0.008	-0.8	0.8
6663	ENSG00000221983	UBA52	19	+	18571878	18572607	18571878	18571900	18573292	18573403	6663	299266175	0,18,0	401399447	0,0,0	780	73	6.89214e-05	0.000766208	1.0,0.58,1.0	1.0,1.0,1.0	-0.14	-14	14
8463	ENSG00000165915	SLC39A13	11	+	47414776	47414909	47414776	47414905	47415059	47415159	8463	29,75,34	0,0,0	75,26,59	10,3,0	77	73	6.93746e-05	0.000769578	1.0,1.0,1.0	0.877,0.891,1.0	0.077	7.7	7.7
3777	ENSG00000108587	GOSR1	17	+	30481142	30481263	30481142	30481257	30484213	30484301	3777	0,2,10	13,9,7	9,13,8	0,0,9	79	73	6.99807e-05	0.000774624	0.0,0.17,0.569	1.0,1.0,0.451	-0.571	-57.1	57.1
5299	ENSG00000172053	QARS	3	-	49103555	49103706	49103630	49103706	49103344	49103409	5299	6,19,9	86116123	0,21,31	21,18,28	148	73	7.08068e-05	0.00078208	0.033,0.075,0.035	0.0,0.365,0.353	-0.192	-19.2	19.2
4794	ENSG00000087088	BAX	19	+	48955714	48955835	48955714	48955833	48956197	48956333	4794	11,10,29	287470424	9,2,0	331299170	75	73	7.11384e-05	0.00078237	0.036,0.02,0.062	0.026,0.006,0.0	0.029	2.9	2.9
6877	ENSG00000141504	SAT2	17	-	7627362	7627802	7627552	7627802	7627142	7627226	6877	31152112	3,0,0	84123101	32,3,5	263	73	7.11061e-05	0.00078237	0.741,1.0,1.0	0.422,0.919,0.849	0.184	18.4	18.4
7671	ENSG00000242485	MRPL20	1	-	1405802	1405886	1405808	1405886	1401912	1402256	7671	4,8,11	297388536	18,33,7	476314396	79	73	7.16845e-05	0.000786687	0.012,0.019,0.019	0.034,0.089,0.016	-0.03	-3	3
3864	ENSG00000168137	SETD5	3	+	9475067	9475299	9475067	9475156	9475482	9476459	3864	0,0,0	5,21,18	4,0,9	5,13,25	216	73	7.23397e-05	0.000792182	0.0,0.0,0.0	0.213,0.0,0.108	-0.107	-10.7	10.7
8282	ENSG00000115806	GORASP2	2	+	170948349	170948430	170948349	170948380	170949538	170949742	8282	21,40,17	0,11,0	31,20,44	0,0,0	123	73	7.26265e-05	0.000793627	1.0,0.683,1.0	1.0,1.0,1.0	-0.106	-10.6	10.6
2319	ENSG00000089685	BIRC5	17	+	78215965	78216066	78215965	78216034	78216663	78216781	2319	1,0,0	50,36,16	5,9,0	56,19,24	105	73	7.75525e-05	0.000845653	0.014,0.0,0.0	0.058,0.248,0.0	-0.097	-9.7	9.7
2713	ENSG00000170037	CNTROB	17	+	7948486	7948619	7948486	7948615	7949084	7949137	2713	49,89,93	0,0,16	126106103	2,0,0	77	73	8.05803e-05	0.000876802	1.0,1.0,0.846	0.984,1.0,1.0	-0.046	-4.6	4.6
1917	ENSG00000064687	ABCA7	19	+	1063759	1063899	1063759	1063863	1064160	1064253	1917	3,25,14	26,92,83	37,14,37	25,47,38	109	73	8.10306e-05	0.000877975	0.072,0.154,0.101	0.498,0.166,0.395	-0.244	-24.4	24.4
8581	ENSG00000009954	BAZ1B	7	-	73459535	73459718	73459550	73459718	73450846	73450994	8581	59,41,29	0,0,0	34,30,15	0,13,0	88	73	8.10162e-05	0.000877975	1.0,1.0,1.0	1.0,0.657,1.0	0.114	11.4	11.4
2639	ENSG00000265241	RBM8A	1	-	145926808	145927077	145927017	145927077	145926481	145926618	2639	426630554	0,0,0	946570593	20,0,2	282	73	8.26734e-05	0.000893884	1.0,1.0,1.0	0.924,1.0,0.987	0.03	3	3
349	ENSG00000038219	BOD1L1	4	-	13607116	13607189	13607121	13607189	13598945	13605084	349	17,8,69	0,0,0	109,33,71	18,0,0	78	73	8.32516e-05	0.000898241	1.0,1.0,1.0	0.85,1.0,1.0	0.05	5	5
1008	ENSG00000143033	MTF2	1	+	93134090	93134195	93134090	93134186	93136669	93136852	1008	6,32,12	0,0,0	51,11,30	5,26,0	82	73	8.46397e-05	0.0009113	1.0,1.0,1.0	0.901,0.274,1.0	0.275	27.5	27.5
3736	ENSG00000111596	CNOT2	12	+	70344127	70344239	70344127	70344228	70346179	70346324	3736	0,0,0	24,38,36	0,23,0	17,27,17	84	73	8.49552e-05	0.000912779	0.0,0.0,0.0	0.0,0.425,0.0	-0.142	-14.2	14.2
6958	ENSG00000140988	RPS2	16	-	1963652	1964365	1964275	1964365	1963148	1963256	6958	180392248	522925790	263211170	500406281	696	73	8.52233e-05	0.000913743	0.035,0.043,0.032	0.052,0.052,0.06	-0.018	-1.8	1.8
7298	ENSG00000109180	OCIAD1	4	+	48831226	48831496	48831226	48831433	48832619	48832682	7298	15,28,4	0,11,0	45,87,96	0,0,0	136	73	8.62873e-05	0.00092322	1.0,0.577,1.0	1.0,1.0,1.0	-0.141	-14.1	14.1
4011	ENSG00000171202	TMEM126A	11	+	85654062	85654256	85654062	85654234	85655593	85655708	4011	60,37,66	0,0,0	194,44,134	5,15,0	95	73	8.64691e-05	0.000923238	1.0,1.0,1.0	0.968,0.693,1.0	0.113	11.3	11.3
1679	ENSG00000027001	MIPEP	13	-	23760087	23760217	23760095	23760217	23756544	23756618	1679	7,0,13	69,90,62	0,0,0	40,10,9	81	73	8.66532e-05	0.00092328	0.084,0.0,0.159	0.0,0.0,0.0	0.081	8.1	8.1
87	ENSG00000104823	ECH1	19	-	38815851	38816007	38815856	38816007	38815421	38815717	87	15,38,18	225228296	6,5,17	270236217	78	73	9.07662e-05	0.000965097	0.059,0.135,0.054	0.02,0.019,0.068	0.047	4.7	4.7
4877	ENSG00000095059	DHPS	19	-	12679622	12679719	12679643	12679719	12679456	12679543	4877	135418335	0,0,6	229207219	19,0,4	94	73	9.12015e-05	0.000967718	1.0,1.0,0.977	0.903,1.0,0.977	0.032	3.2	3.2
3109	ENSG00000185624	P4HB	17	-	81845459	81845647	81845626	81845647	81845143	81845230	3109	83817831634	0,3,19	138011231137	24,16,10	240	73	9.17298e-05	0.000971313	1.0,0.994,0.963	0.946,0.955,0.972	0.028	2.8	2.8
3788	ENSG00000168591	TMUB2	17	+	44188934	44189588	44188934	44189299	44190500	44190635	3788	96,199,98	0,0,0	133119115	12,0,0	362	73	9.2216e-05	0.000974447	1.0,1.0,1.0	0.691,1.0,1.0	0.103	10.3	10.3
7358	ENSG00000169062	UPF3A	13	+	114298839	114299059	114298839	114299000	114301730	114301792	7358	3,0,5	63,55,111	20,5,8	114,60,79	132	73	9.33512e-05	0.000984413	0.026,0.0,0.024	0.088,0.044,0.053	-0.045	-4.5	4.5
1513	ENSG00000110492	MDK	11	+	46382586	46383193	46382586	46382748	46383468	46383806	1513	108258187	120916661619	56,48,49	929606562	518	73	9.35879e-05	0.000984883	0.012,0.021,0.016	0.008,0.011,0.012	0.006	0.6	0.6
4134	ENSG00000120656	TAF12	1	-	28642921	28643066	28642991	28643066	28621913	28622165	4134	12,15,11	64,102,84	7,0,3	102,60,61	143	73	9.53494e-05	0.00100136	0.087,0.07,0.063	0.034,0.0,0.024	0.054	5.4	5.4
1714	ENSG00000077463	SIRT6	19	-	4175679	4175937	4175841	4175937	4175027	4175151	1714	37,82,60	0,0,0	160,136,92	16,0,0	235	73	9.59206e-05	0.0010053	1.0,1.0,1.0	0.756,1.0,1.0	0.081	8.1	8.1
1941	ENSG00000129219	PLD2	17	+	4819083	4819218	4819083	4819184	4819428	4819465	1941	70,66,60	0,0,0	35,3,18	9,0,0	107	73	9.93728e-05	0.00103936	1.0,1.0,1.0	0.726,1.0,1.0	0.091	9.1	9.1
4860	ENSG00000196704	AMZ2	17	+	68250187	68250967	68250187	68250470	68251049	68251178	4860	192253377	0,0,0	168139221	13,0,0	570	73	0.000100641	0.00105048	1.0,1.0,1.0	0.623,1.0,1.0	0.126	12.6	12.6
4154	ENSG00000135441	BLOC1S1	12	+	55716530	55716717	55716530	55716588	55719090	55719223	4154	106136136	0,16,0	101,82,19	0,0,0	202	73	0.000102384	0.00106529	1.0,0.754,1.0	1.0,1.0,1.0	-0.082	-8.2	8.2
6618	ENSG00000196998	WDR45	X	-	49076405	49076524	49076429	49076524	49075865	49075945	6618	2,12,0	28,76,50	0,1,0	58,134,39	97	73	0.000102475	0.00106529	0.051,0.106,0.0	0.0,0.006,0.0	0.05	5	5
8054	ENSG00000180891	CUEDC1	17	-	57867337	57867418	57867356	57867418	57866473	57866544	8054	0,0,0	30,40,55	5,0,11	73,63,12	92	73	0.000107545	0.00111572	0.0,0.0,0.0	0.052,0.0,0.421	-0.158	-15.8	15.8
3233	ENSG00000128159	TUBGCP6	22	-	50218702	50218897	50218709	50218897	50218487	50218620	3233	50,39,34	0,0,0	44,45,46	0,14,0	80	73	0.000108126	0.00111948	1.0,1.0,1.0	1.0,0.746,1.0	0.085	8.5	8.5
8337	ENSG00000141552	ANAPC11	17	+	81894466	81894624	81894466	81894586	81899919	81900254	8337	43,109,60	61412651043	56,37,76	144011841322	111	73	0.000110008	0.00113667	0.044,0.054,0.036	0.025,0.02,0.036	0.018	1.8	1.8
6023	ENSG00000114316	USP4	3	-	49335468	49335596	49335557	49335596	49327685	49327816	6023	11,44,38	0,0,0	52,9,62	12,0,0	162	73	0.000110937	0.00114397	1.0,1.0,1.0	0.661,1.0,1.0	0.113	11.3	11.3
1698	ENSG00000172809	RPL38	17	+	74203703	74203770	74203703	74203736	74203917	74203958	1698	3,10,69	10,0,8	65,113,31	2,0,0	107	73	0.000112402	0.00115675	0.17,1.0,0.855	0.957,1.0,1.0	-0.311	-31.1	31.1
2678	ENSG00000107959	PITRM1	10	-	3148167	3148291	3148170	3148291	3147986	3148063	2678	0,0,0	42,33,40	4,0,5	27,16,15	76	73	0.00011795	0.00121141	0.0,0.0,0.0	0.125,0.0,0.243	-0.123	-12.3	12.3
510	ENSG00000135457	TFCP2	12	-	51099654	51099779	51099666	51099779	51098775	51098918	510	21,27,28	0,16,0	60,43,58	0,0,0	85	73	0.000121684	0.00124726	1.0,0.592,1.0	1.0,1.0,1.0	-0.136	-13.6	13.6
3113	ENSG00000117419	ERI3	1	-	44354891	44355260	44355259	44355260	44319627	44319744	3113	46220131	0,10,0	40,24,32	3,6,5	441	73	0.000122304	0.00125111	1.0,0.785,1.0	0.688,0.398,0.514	0.395	39.5	39.5
6102	ENSG00000162402	USP24	1	-	55071805	55071924	55071813	55071924	55066358	55069107	6102	0,23,0	10,28,24	0,0,0	19,15,14	81	73	0.00012328	0.00125859	0.0,0.425,0.0	0.0,0.0,0.0	0.142	14.2	14.2
943	ENSG00000130159	ECSIT	19	-	11507701	11508048	11507990	11508048	11507456	11507562	943	97216140	0,0,1	247198255	0,1,15	362	73	0.000124685	0.00127039	1.0,1.0,0.966	1.0,0.976,0.774	0.072	7.2	7.2
4129	ENSG00000168476	REEP4	8	-	22138638	22138793	22138647	22138793	22138019	22138552	4129	106153180	19,0,0	100157125	0,0,0	82	73	0.000126733	0.00128871	0.832,1.0,1.0	1.0,1.0,1.0	-0.056	-5.6	5.6
714	ENSG00000106290	TAF6	7	-	100113348	100113769	100113615	100113769	100112797	100112917	714	49,38,43	0,0,0	27,41,44	0,4,3	340	73	0.000128751	0.00130405	1.0,1.0,1.0	1.0,0.688,0.759	0.184	18.4	18.4
8728	ENSG00000172366	FAM195A	16	+	647782	647884	647782	647849	648119	648474	8728	107230241	0,20,0	118,124,86	0,0,0	108	73	0.000128618	0.00130405	1.0,0.886,1.0	1.0,1.0,1.0	-0.038	-3.8	3.8
5644	ENSG00000103253	HAGHL	16	+	728793	728895	728793	728868	729008	729088	5644	151268241	9,24,3	28,15,16	0,0,0	100	73	0.000130354	0.00131768	0.925,0.891,0.983	1.0,1.0,1.0	-0.067	-6.7	6.7
4239	ENSG00000137154	RPS6	9	-	19379377	19379618	19379462	19379618	19378707	19378918	4239	1,25,1	0,10,0	4,10,32	0,0,0	158	73	0.000130981	0.00132141	1.0,0.536,1.0	1.0,1.0,1.0	-0.155	-15.5	15.5
5541	ENSG00000114107	CEP70	3	-	138500109	138500224	138500135	138500224	138498030	138498110	5541	7,33,27	0,0,12	29,30,53	0,0,0	99	73	0.000131537	0.00132442	1.0,1.0,0.624	1.0,1.0,1.0	-0.125	-12.5	12.5
7887	ENSG00000086065	CHMP5	9	+	33264941	33265169	33264941	33265147	33266009	33266114	7887	0,5,0	21,60,50	26,13,9	113126114	95	73	0.000132292	0.0013294	0.0,0.06,0.0	0.15,0.073,0.057	-0.073	-7.3	7.3
3654	ENSG00000137413	TAF8	6	+	42055951	42056034	42055951	42056014	42057388	42057513	3654	0,0,0	8,18,11	10,0,1	37,11,18	93	73	0.000133632	0.00134025	0.0,0.0,0.0	0.175,0.0,0.042	-0.072	-7.2	7.2
4509	ENSG00000062822	POLD1	19	+	50415723	50416528	50415723	50415826	50416609	50416723	4509	255400309	0,0,0	294239206	0,4,5	775	73	0.000135543	0.00135675	1.0,1.0,1.0	1.0,0.849,0.795	0.119	11.9	11.9
1025	ENSG00000128973	CLN6	15	-	68211555	68211863	68211674	68211863	68211262	68211318	1025	0,8,0	18,28,46	20,0,6	22,5,3	192	73	0.000139086	0.00138741	0.0,0.098,0.0	0.257,0.0,0.432	-0.197	-19.7	19.7
7201	ENSG00000229117	RPL41	12	+	56116753	56116930	56116753	56116863	56117188	56117211	7201	69175109	80154153	223269222	141,72,143	140	73	0.000139147	0.00138741	0.31,0.372,0.271	0.452,0.661,0.447	-0.202	-20.2	20.2
191	ENSG00000111231	GPN3	12	-	110468125	110468264	110468195	110468264	110465105	110465214	191	16,15,26	0,0,0	102,38,77	8,5,0	143	73	0.000140458	0.00139686	1.0,1.0,1.0	0.867,0.795,1.0	0.113	11.3	11.3
7193	ENSG00000229117	RPL41	12	+	56116753	56116816	56116753	56116799	56117188	56117211	7193	33,60,53	550085548521	124,97,118	794052775300	90	73	0.00014064	0.00139686	0.005,0.006,0.005	0.013,0.015,0.018	-0.01	-1	1
8091	ENSG00000149743	TRPT1	11	-	64226061	64226233	64226190	64226233	64225785	64225869	8091	85,66,54	0,0,0	42,12,33	12,0,0	202	73	0.000141747	0.00140514	1.0,1.0,1.0	0.558,1.0,1.0	0.147	14.7	14.7
5038	ENSG00000175634	RPS6KB2	11	+	67428497	67428623	67428497	67428510	67429119	67429240	5038	30,49,34	0,0,0	56,55,33	0,13,0	186	73	0.000142199	0.00140613	1.0,1.0,1.0	1.0,0.624,1.0	0.125	12.5	12.5
5468	ENSG00000127184	COX7C	5	+	86619352	86619878	86619352	86619442	86620667	86620766	5468	171325582578	0,0,6	217121761808	12,1,15	509	73	0.000142397	0.00140613	1.0,1.0,0.984	0.963,0.997,0.945	0.026	2.6	2.6
2199	ENSG00000099797	TECR	19	+	14564785	14564992	14564785	14564858	14565201	14565290	2199	7,18,19	0,0,0	48,82,104	0,1,12	207	73	0.000144592	0.00142285	1.0,1.0,1.0	1.0,0.967,0.753	0.093	9.3	9.3
6704	ENSG00000147687	TATDN1	8	-	124538927	124539078	124539024	124539078	124522936	124523002	6704	5,8,21	115173154	16,32,7	83,142,59	170	73	0.000144644	0.00142285	0.018,0.019,0.055	0.076,0.088,0.048	-0.04	-4	4
5115	ENSG00000143314	MRPL24	1	-	156741011	156741088	156741015	156741088	156738521	156738764	5115	150140129	0,17,5	66,48,22	0,0,0	77	73	0.000146553	0.00143885	1.0,0.886,0.961	1.0,1.0,1.0	-0.051	-5.1	5.1
3314	ENSG00000160741	CRTC2	1	-	153951259	153952096	153951855	153952096	153949171	153949384	3314	75179126	0,0,0	168214229	0,15,0	669	73	0.000149399	0.001464	1.0,1.0,1.0	1.0,0.609,1.0	0.13	13	13
1654	ENSG00000132635	PCED1A	20	-	2838837	2839082	2838843	2839082	2838595	2838746	1654	13,7,0	17,90,55	1,0,0	33,22,19	79	73	0.000152827	0.00149473	0.414,0.067,0.0	0.027,0.0,0.0	0.151	15.1	15.1
5327	ENSG00000258890	CEP95	17	+	64530925	64531022	64530925	64531018	64531889	64532022	5327	7,0,0	13,20,13	27,29,13	35,49,19	77	73	0.000155178	0.00151483	0.338,0.0,0.0	0.422,0.359,0.393	-0.279	-27.9	27.9
5645	ENSG00000103253	HAGHL	16	+	728796	728895	728796	728868	729287	729715	5645	27121103	14,6,0	31,10,6	0,0,0	100	73	0.000156992	0.00152962	0.585,0.936,1.0	1.0,1.0,1.0	-0.16	-16	16
6130	ENSG00000079462	PAFAH1B3	19	-	42302521	42302770	42302698	42302770	42302231	42302325	6130	21,44,102	0,10,1	30,13,14	0,0,0	250	73	0.000157321	0.00152992	1.0,0.562,0.968	1.0,1.0,1.0	-0.157	-15.7	15.7
2876	ENSG00000124357	NAGK	2	+	71075554	71075642	71075554	71075610	71076603	71076701	2876	36,72,46	0,0,0	113,97,82	16,0,0	105	73	0.000158214	0.00153306	1.0,1.0,1.0	0.831,1.0,1.0	0.056	5.6	5.6
5036	ENSG00000175634	RPS6KB2	11	+	67432736	67432845	67432736	67432837	67432951	67433042	5036	2,1,0	28,56,95	37,1,0	68,70,58	81	73	0.000158242	0.00153306	0.06,0.016,0.0	0.329,0.013,0.0	-0.089	-8.9	8.9
579	ENSG00000134057	CCNB1	5	+	69167262	69167447	69167262	69167283	69167907	69168078	579	23,2,8	99131153	0,0,0	154,111,54	237	73	0.000158707	0.00153467	0.067,0.005,0.016	0.0,0.0,0.0	0.029	2.9	2.9
1413	ENSG00000070610	GBA2	9	-	35738760	35738903	35738792	35738903	35738493	35738632	1413	21,25,30	0,0,14	42,17,22	0,0,0	105	73	0.000159057	0.00153516	1.0,1.0,0.598	1.0,1.0,1.0	-0.134	-13.4	13.4
4633	ENSG00000057019	DCBLD2	3	-	98901121	98901689	98901639	98901689	98881539	98881767	4633	504775721	0,11,7	228171141	0,0,0	591	73	0.000159988	0.00154123	1.0,0.897,0.927	1.0,1.0,1.0	-0.059	-5.9	5.9
6314	ENSG00000008988	RPS20	8	-	56073547	56073768	56073689	56073768	56073074	56073272	6314	18,66,8	0,0,0	75,56,87	0,0,14	215	73	0.000160351	0.00154184	1.0,1.0,1.0	1.0,1.0,0.678	0.107	10.7	10.7
3771	ENSG00000104341	LAPTM4B	8	+	97825057	97825157	97825057	97825153	97851396	97853013	3771	10,11,11	298256385	18,18,33	284343255	77	73	0.000160814	0.00154339	0.031,0.039,0.026	0.057,0.047,0.109	-0.039	-3.9	3.9
8485	ENSG00000172663	TMEM134	11	-	67467164	67467388	67467311	67467388	67465055	67465267	8485	1,8,20	0,0,7	0,0,11	4,11,7	220	73	0.000164304	0.00157394	1.0,1.0,0.487	0.0,0.0,0.343	0.715	71.5	71.5
1339	ENSG00000089063	TMEM230	20	-	5112729	5113042	5112955	5113042	5109331	5109445	1339	48,50,53	0,0,0	88,98,92	4,5,0	299	73	0.00016469	0.00157469	1.0,1.0,1.0	0.843,0.827,1.0	0.11	11	11
7653	ENSG00000115204	MPV17	2	-	27312493	27312589	27312547	27312589	27312213	27312246	7653	50,128,81	0,12,0	125,89,110	0,0,0	127	73	0.000165181	0.00157645	1.0,0.86,1.0	1.0,1.0,1.0	-0.047	-4.7	4.7
7469	ENSG00000100104	SRRD	22	+	26483989	26484226	26483989	26484099	26486022	26486063	7469	0,7,2	1,9,22	31,4,17	30,2,5	200	73	0.000166757	0.00158853	0.0,0.221,0.032	0.274,0.422,0.554	-0.332	-33.2	33.2
4557	ENSG00000102054	RBBP7	X	-	16862950	16863100	16862954	16863100	16858675	16858849	4557	2,0,0	81,139,87	13,0,3	13,71,55	77	73	0.000169421	0.00161091	0.023,0.0,0.0	0.487,0.0,0.049	-0.171	-17.1	17.1
2462	ENSG00000161939	RNASEK-C17orf49	17	+	7016949	7017164	7016949	7017014	7017260	7017502	2462	7,10,33	204266238	27,19,66	292253239	223	73	0.000173959	0.001651	0.011,0.012,0.043	0.029,0.024,0.083	-0.023	-2.3	2.3
2265	ENSG00000167107	ACSF2	17	+	50473893	50474078	50473893	50474004	50474198	50474267	2265	12,0,11	38105157	3,0,0	188,50,52	147	73	0.000174604	0.00165101	0.136,0.0,0.034	0.008,0.0,0.0	0.054	5.4	5.4
6562	ENSG00000221914	PPP2R2A	8	+	26362683	26363890	26362683	26362848	26366314	26366406	6562	72218141	0,0,0	272261148	0,1,12	1115	73	0.000174517	0.00165101	1.0,1.0,1.0	1.0,0.945,0.447	0.203	20.3	20.3
4616	ENSG00000143537	ADAM15	1	+	155052670	155052777	155052670	155052768	155053416	155053493	4616	79,83,37	6,7,0	62,42,55	0,0,0	82	73	0.000175497	0.00165639	0.921,0.913,1.0	1.0,1.0,1.0	-0.055	-5.5	5.5
1642	ENSG00000183010	PYCR1	17	-	81936969	81937248	81937241	81937248	81936747	81936861	1642	34,70,89	17,29,9	2,35,27	0,3,0	345	73	0.000177747	0.00167455	0.297,0.338,0.677	1.0,0.712,1.0	-0.467	-46.7	46.7
7246	ENSG00000125458	NT5C	17	-	75130964	75131281	75131044	75131281	75130752	75130867	7246	81,94,55	100246146	75,44,64	43,56,64	153	73	0.00017935	0.00168655	0.279,0.154,0.152	0.454,0.273,0.323	-0.155	-15.5	15.5
1999	ENSG00000101017	CD40	20	+	46126639	46126741	46126639	46126701	46128137	46128236	1999	20,0,0	20,21,25	0,0,0	39,27,29	113	73	0.000180014	0.00168969	0.392,0.0,0.0	0.0,0.0,0.0	0.131	13.1	13.1
2630	ENSG00000108773	KAT2A	17	-	42114888	42115035	42114953	42115035	42114489	42114604	2630	36,103,75	0,13,0	40,20,36	0,0,0	138	73	0.000181737	0.00169655	1.0,0.807,1.0	1.0,1.0,1.0	-0.064	-6.4	6.4
408	ENSG00000110619	CARS	11	-	3002520	3002600	3002540	3002600	3001969	3002053	408	38,50,70	429603575	51,66,22	336235197	93	73	0.000181673	0.00169655	0.065,0.061,0.087	0.106,0.181,0.081	-0.052	-5.2	5.2
4448	ENSG00000197324	LRP10	14	+	22875354	22876372	22875354	22875465	22876688	22876818	4448	473619461	13,0,0	380247334	0,0,0	980	73	0.000181561	0.00169655	0.73,1.0,1.0	1.0,1.0,1.0	-0.09	-9	9
3173	ENSG00000112984	KIF20A	5	+	138186293	138186516	138186293	138186431	138187095	138187665	3173	3,12,1	107148112	12,12,4	78,76,35	158	73	0.000185189	0.00172562	0.013,0.036,0.004	0.066,0.068,0.05	-0.044	-4.4	4.4
4767	ENSG00000160445	ZER1	9	-	128750615	128750789	128750621	128750789	128742529	128742745	4767	3,64,33	7,0,6	11,24,3	0,0,0	79	73	0.000186868	0.00173531	0.284,1.0,0.836	1.0,1.0,1.0	-0.293	-29.3	29.3
8598	ENSG00000092841	MYL6	12	+	56160244	56160327	56160244	56160320	56161386	56161575	8598	56,60,114	93211511442	235162234	573248844595	80	73	0.000186906	0.00173531	0.052,0.045,0.067	0.036,0.029,0.044	0.018	1.8	1.8
816	ENSG00000161914	ZNF653	19	-	11484041	11484141	11484079	11484141	11483426	11483859	816	17,8,54	2,7,0	44,13,39	0,0,0	111	73	0.000190105	0.00176182	0.848,0.429,1.0	1.0,1.0,1.0	-0.241	-24.1	24.1
7715	ENSG00000131748	STARD3	17	+	39657774	39657852	39657774	39657839	39657972	39658026	7715	19,54,15	0,0,0	23,27,31	0,14,0	86	73	0.000191126	0.00176809	1.0,1.0,1.0	1.0,0.621,1.0	0.126	12.6	12.6
2953	ENSG00000142676	RPL11	1	+	23694659	23694790	23694659	23694788	23695797	23696128	2953	40,75,88	0,0,0	38,61,51	0,12,0	75	73	0.000197358	0.00182245	1.0,1.0,1.0	1.0,0.832,1.0	0.056	5.6	5.6
7072	ENSG00000067225	PKM	15	-	72208616	72208891	72208620	72208891	72207126	72207277	7072	47,230,95	263640093932	134,73,102	268916491762	77	73	0.000198233	0.00182724	0.017,0.052,0.022	0.045,0.04,0.052	-0.015	-1.5	1.5
4485	ENSG00000060656	PTPRU	1	+	29311455	29311553	29311455	29311544	29311642	29311759	4485	22,35,15	0,16,22	5,3,2	0,0,1	82	73	0.0002005	0.00184481	1.0,0.661,0.378	1.0,1.0,0.64	-0.2	-20	20
1088	ENSG00000132406	TMEM128	4	-	4247600	4248212	4248105	4248212	4246201	4246343	1088	24,20,18	4,8,7	40,30,4	0,3,0	578	73	0.000206088	0.00189103	0.431,0.24,0.245	1.0,0.558,1.0	-0.547	-54.7	54.7
3749	ENSG00000185324	CDK10	16	+	89694930	89695070	89694930	89695052	89695292	89695345	3749	62170138	0,0,2	178,84,89	6,7,3	91	73	0.000206261	0.00189103	1.0,1.0,0.982	0.96,0.906,0.96	0.052	5.2	5.2
1307	ENSG00000179218	CALR	19	+	12940785	12940975	12940785	12940887	12943536	12943629	1307	67,92,88	87817091323	222126133	176414241650	161	73	0.00020702	0.00189157	0.033,0.024,0.029	0.054,0.039,0.035	-0.014	-1.4	1.4
3569	ENSG00000152795	HNRNPDL	4	-	82425557	82425667	82425562	82425667	82424629	82424883	3569	3,0,13	57,116,83	40,37,42	235310218	78	73	0.000207058	0.00189157	0.047,0.0,0.128	0.137,0.1,0.153	-0.072	-7.2	7.2
8232	ENSG00000177697	CD151	11	+	836250	836843	836250	836442	837249	837354	8232	4651006697	0,0,0	140511821199	4,18,0	474	73	0.000208333	0.00189983	1.0,1.0,1.0	0.982,0.91,1.0	0.036	3.6	3.6
143	ENSG00000148498	PARD3	10	-	34337277	34337426	34337364	34337426	34336198	34336243	143	16,37,49	0,13,0	86,49,51	0,0,0	160	73	0.000209519	0.00190725	1.0,0.565,1.0	1.0,1.0,1.0	-0.145	-14.5	14.5
1712	ENSG00000077463	SIRT6	19	-	4175679	4175937	4175841	4175937	4174703	4174946	1712	13,15,17	0,0,0	58,39,36	10,0,0	235	73	0.000210655	0.0019142	1.0,1.0,1.0	0.643,1.0,1.0	0.119	11.9	11.9
3783	ENSG00000152117	AC093838.4	2	+	131519534	131519666	131519534	131519625	131520096	131521573	3783	7,19,3	0,10,0	54,38,28	0,0,0	114	73	0.000213521	0.0019368	1.0,0.549,1.0	1.0,1.0,1.0	-0.15	-15	15
2667	ENSG00000167113	COQ4	9	+	128325142	128325239	128325142	128325189	128325778	128325881	2667	24,38,41	0,0,10	29,54,26	0,0,0	123	73	0.000214935	0.00194275	1.0,1.0,0.709	1.0,1.0,1.0	-0.097	-9.7	9.7
4086	ENSG00000183291	2015-09-01	1	-	86914027	86914424	86914314	86914424	86903280	86903448	4086	189342170	2,7,6	339288275	11,28,19	360	73	0.000214665	0.00194275	0.95,0.908,0.852	0.862,0.676,0.746	0.142	14.2	14.2
2129	ENSG00000157045	NTAN1	16	-	15047996	15048099	15048077	15048099	15047854	15047920	2129	29,95,48	0,0,14	84,21,50	0,0,0	154	73	0.000216409	0.00195134	1.0,1.0,0.619	1.0,1.0,1.0	-0.127	-12.7	12.7
2467	ENSG00000181396	OGFOD3	17	-	82415397	82415627	82415405	82415627	82411458	82411530	2467	49,71,53	0,15,0	37,10,26	0,0,0	81	73	0.000216646	0.00195134	1.0,0.81,1.0	1.0,1.0,1.0	-0.063	-6.3	6.3
8831	ENSG00000143156	NME7	1	-	169169432	169169554	169169446	169169554	169132530	169132817	8831	0,0,0	33,43,80	9,0,14	124186132	87	73	0.000217582	0.00195633	0.0,0.0,0.0	0.057,0.0,0.082	-0.046	-4.6	4.6
1488	ENSG00000151552	QDPR	4	-	17511949	17512087	17512032	17512087	17509270	17509363	1488	50,120,68	0,0,14	43,57,34	0,0,0	156	73	0.000219134	0.00196683	1.0,1.0,0.694	1.0,1.0,1.0	-0.102	-10.2	10.2
6646	ENSG00000116350	SRSF4	1	-	29159348	29159486	29159373	29159486	29154735	29154910	6646	3,11,0	22,4,21	0,0,0	45,72,35	98	73	0.000225718	0.00202239	0.092,0.672,0.0	0.0,0.0,0.0	0.255	25.5	25.5
7862	ENSG00000111679	PTPN6	12	+	6960805	6960945	6960805	6960936	6961125	6961316	7862	86140188	4,12,2	108,51,69	0,0,0	82	73	0.000226471	0.00202559	0.95,0.912,0.988	1.0,1.0,1.0	-0.05	-5	5
[truncated: 4,552 more rows]

## Sheet: S Tab2 MXE
ID	GeneID	geneSymbol	chr	strand	1stExonStart_0base	1stExonEnd	2ndExonStart_0base	2ndExonEnd	upstreamES	upstreamEE	downstreamES	downstreamEE	ID	IC_SAMPLE_1	SC_SAMPLE_1	IC_SAMPLE_2	SC_SAMPLE_2	IncFormLen	SkipFormLen	PValue	FDR	IncLevel1	IncLevel2	IncLevelDifference	dPSI	Abs dPSI
[truncated: 2,916 more rows]

[truncated: 3 more sheets: Sup Tab2 RI, Sup Tab 2 SE, Sup Tab 2 A3 Splicing]
